# Supplementary material
Source: publisher figshare collection journal article supplement (https://gsajournals.figshare.com/articles/dataset/_/27146583)
Supplement: Supplementary file 1 [file 1]

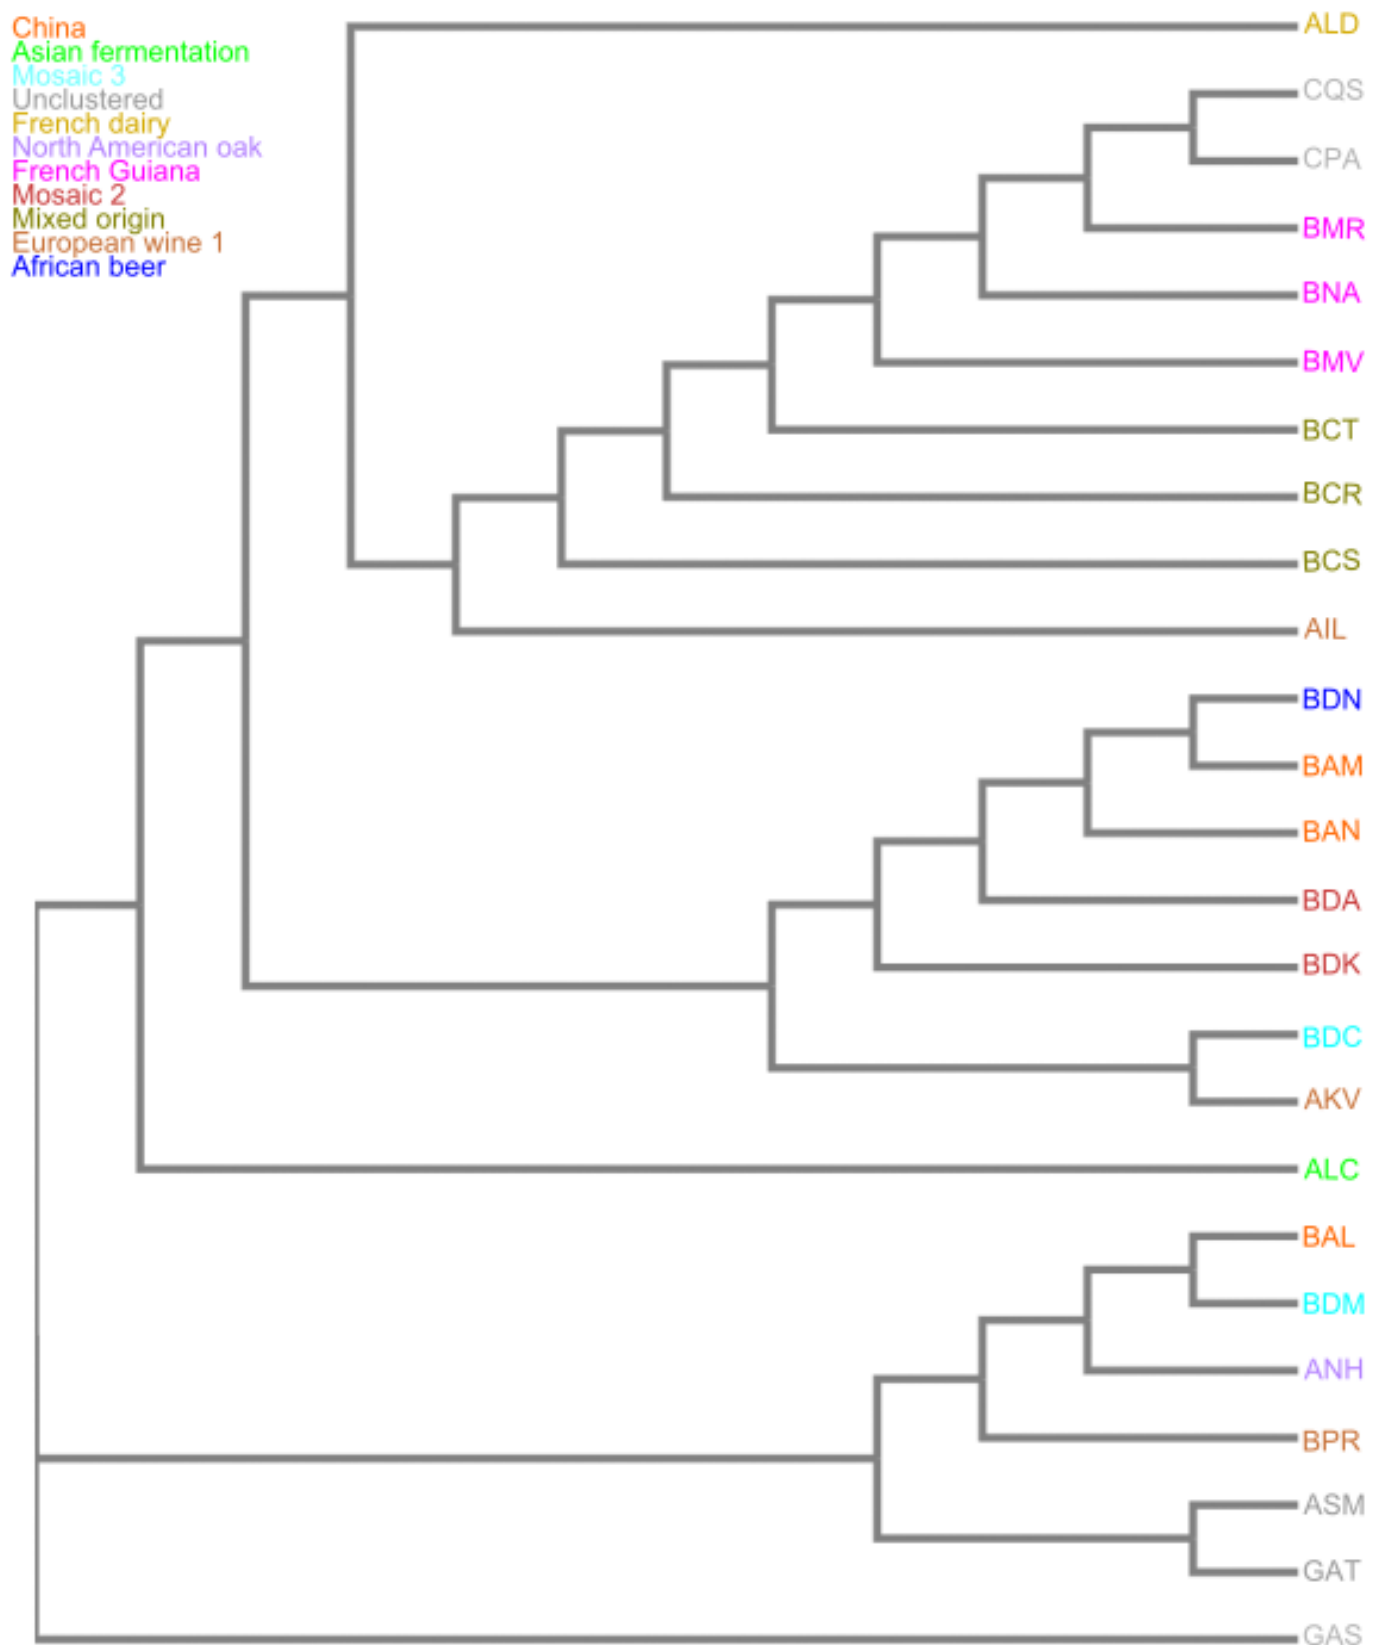

**Figure S3. Phylogenetic tree of natural *S. cerevisiae* isolates based on *ACT1* sequence.** As in Figure 4C, but with *S. cerevisiae* isolates from Figure 2B and the clade assignments as in Figure S1. Tree was created using the Simple Phylogeny tool at the EMBL-EBI server.
