# Supplementary material
Source: publisher figshare collection journal article supplement (https://gsajournals.figshare.com/articles/dataset/_/27146583)
Supplement: Supplementary file 1 [file 1]

## Sheet: All 1,011 genomes
Identifier	Lab HO deletion	Strain name and Genome (FASTA)	Strain name and Genome	Ala189: CTCGCAGGAAATG	Thr189: CTCACAGGAAATG	Thr/Ala189: CTCRCAGGAAATG	Gly223: GACGGTA	Asp223: GACGATA	Ser223: GACAGTA	Gly/Ser223 Heterozygous: GACRGTA	Gly/Asp223 Heterozygous: GACGRTA	Leu405: AACTTTACAGAA	Ser405: AACTTCACAGAA	Leu/Ser405 heterozygous: AACTTYACAGAA	Leu475: AGAACAGCTTAAA	His475: AGAACAGCATAAA	Leu/His475: AGAACAGCWTAAA	36-amino acid deletion at positions 524–559: TGTATAAAATGTGGCG	Group	Geographical origins	Standardized name	Ecological origins
CGV	no	> CGV_YDL227C_HO chromosome4:46271-48031 - 692 ATGCTTTCTGAAAACACGACTATTCTGATGGCTAACGGTGAAATTAAAGACATCGCAAACGTCACGGCTAACTCTTACGTTATGTGCGCAGATGGCTCCGCTGCCCGCGTCATAAATGTCACACAGGGCTATCAGAAAATCTATAATATACAGCAAAAAACCAAACACAGAGCTTTTGAAGGTGAACCTGGTAGGTTAGATCCCAGGCGTAGAACAGTTTATCAGCGTCTTGCATTACAATGTACTGCAGGTCATAAATTGTCAGTCAGGGTCCCTACCAAACCACTGTTGGAAAAAAGTGGTAGAAATGCCACCAAATATAAAGTGAGATGGAGAAATCTGCAGCAATGTC…	CGV_YDL227C_HO chromosome4:46271-48031 - 692ATGCTTTCTGAAAACACGACTATTCTGATGGCTAACGGTGAAATTAAAGACATCGCAAACGTCACGGCTAACTCTTACGTTATGTGCGCAGATGGCTCCGCTGCCCGCGTCATAAATGTCACACAGGGCTATCAGAAAATCTATAATATACAGCAAAAAACCAAACACAGAGCTTTTGAAGGTGAACCTGGTAGGTTAGATCCCAGGCGTAGAACAGTTTATCAGCGTCTTGCATTACAATGTACTGCAGGTCATAAATTGTCAGTCAGGGTCCCTACCAAACCACTGTTGGAAAAAAGTGGTAGAAATGCCACCAAATATAAAGTGAGATGGAGAAATCTGCAGCAATGTCAGA…	ALA	notfound	notfound	GLY	notfound	notfound	notfound	notfound	notfound	SER	notfound	LEU	notfound	notfound	notfound	1	Lebanon	CGV	Wine
CET	no	> CET_YDL227C_HO chromosome4:46271-48031 - 692 ATGCTTTCTGAAAACACGACTATTCTGATGGCTAACGGTGAAATTAAAGACATCGCAAACGTCACGGCTAACTCTTACGTTATGTGCGCAGATGGCTCCGCTGCCCGCGTCATAAATGTCACACAGGGCTATCAGAAAATCTATAATATACAGCAAAAAACCAAACACAGAGCTTTTGAAGGTGAACCTGGTAGGTTAGATCCCAGGCGTAGAGCAGTTTATCAGCGTCTTGCATTACAATGTACTGCAGGTCATAAATTGTCAGTCAGGGTCCCTACCAAACCACTGTTGGAAAAAAGTGGTAGAAATGCCACCAAATATAAAGTGAGATGGAGAAATCTGCAGCAATGTC…	CET_YDL227C_HO chromosome4:46271-48031 - 692ATGCTTTCTGAAAACACGACTATTCTGATGGCTAACGGTGAAATTAAAGACATCGCAAACGTCACGGCTAACTCTTACGTTATGTGCGCAGATGGCTCCGCTGCCCGCGTCATAAATGTCACACAGGGCTATCAGAAAATCTATAATATACAGCAAAAAACCAAACACAGAGCTTTTGAAGGTGAACCTGGTAGGTTAGATCCCAGGCGTAGAGCAGTTTATCAGCGTCTTGCATTACAATGTACTGCAGGTCATAAATTGTCAGTCAGGGTCCCTACCAAACCACTGTTGGAAAAAAGTGGTAGAAATGCCACCAAATATAAAGTGAGATGGAGAAATCTGCAGCAATGTCAGA…	ALA	notfound	notfound	GLY	notfound	notfound	notfound	notfound	LEU	notfound	notfound	LEU	notfound	notfound	36	2	Ghana	CET	Bakery
CHM	no	> CHM_YDL227C_HO chromosome4:46271-48031 - 692 ATGCTTTCTGAAAACACGACTATTCTGATGGCTAACGGTGAAATTAAAGACATCGCAAACGTCACGGCTAACTCTTACGTTATGTGCGCAGATAGCTCCGCTGCCCGCGTCATAAATGTCACACAGGGCTATCAGAAAATCTATAATATACAGCAAAAAACCAAACACAGAGCTTTTGAAGGTGAACCTGGTAGGTTAGATCCCAGGCGTAGAACAGTTTATCAGCGTCTTGCATTATAATGTACTGCAGGTCATAAATTGTCAGTCAGGGTCCCTACAAAACCACTGTTGGAAAAAAGTGGTAGAAATGCCACCAAATATAAAGTGAGATGGAGAAATCTGCAGCAATGTC…	CHM_YDL227C_HO chromosome4:46271-48031 - 692ATGCTTTCTGAAAACACGACTATTCTGATGGCTAACGGTGAAATTAAAGACATCGCAAACGTCACGGCTAACTCTTACGTTATGTGCGCAGATAGCTCCGCTGCCCGCGTCATAAATGTCACACAGGGCTATCAGAAAATCTATAATATACAGCAAAAAACCAAACACAGAGCTTTTGAAGGTGAACCTGGTAGGTTAGATCCCAGGCGTAGAACAGTTTATCAGCGTCTTGCATTATAATGTACTGCAGGTCATAAATTGTCAGTCAGGGTCCCTACAAAACCACTGTTGGAAAAAAGTGGTAGAAATGCCACCAAATATAAAGTGAGATGGAGAAATCTGCAGCAATGTCAGA…	ALA	notfound	notfound	GLY	notfound	notfound	notfound	notfound	LEU	notfound	notfound	LEU	notfound	notfound	36	2	Northern Europe	CHM	Bakery
BVC	no	> BVC_YDL227C_HO chromosome4:46271-48031 - 692 ATGCTTTCTGAAAACACGACTATTCTGATGGCTAACGGTGAAATTAAAGACATCGCAAACGTCACGGCTAACTCTTACGTTATGTGCGCAGATGGCTCCGCTGCCCGCGTCATAAATGTCACACAGGGCTATCAGAAAATCTATAATATACAGCAAAAAACCAAACACAGAGCTTTTGAAGGTGAACCTGGTAGGTTAGATCCCAGGCGTAGAACAGTTTATCAGCGTCTTGCATTACAATGTACTGCAGGTCATAAATTGTCAGTCAGGGTCCCTACCAAACCACTGTTGGAAAAAAGTGGTAGAAATGCCACCAAATATAAAGTGAGATGGAGAAATCTGCAGCAATGTC…	BVC_YDL227C_HO chromosome4:46271-48031 - 692ATGCTTTCTGAAAACACGACTATTCTGATGGCTAACGGTGAAATTAAAGACATCGCAAACGTCACGGCTAACTCTTACGTTATGTGCGCAGATGGCTCCGCTGCCCGCGTCATAAATGTCACACAGGGCTATCAGAAAATCTATAATATACAGCAAAAAACCAAACACAGAGCTTTTGAAGGTGAACCTGGTAGGTTAGATCCCAGGCGTAGAACAGTTTATCAGCGTCTTGCATTACAATGTACTGCAGGTCATAAATTGTCAGTCAGGGTCCCTACCAAACCACTGTTGGAAAAAAGTGGTAGAAATGCCACCAAATATAAAGTGAGATGGAGAAATCTGCAGCAATGTCAGA…	ALA	notfound	notfound	GLY	notfound	notfound	notfound	notfound	LEU	notfound	notfound	LEU	notfound	notfound	36	2	Brazil	BVC	Bioethanol
AKR	no	> AKR_YDL227C_HO chromosome4:46271-48031 - 692 ATGCTTTCTGAAAACACGACTATTCTGATGGCTAACGGTGAAATTAAAGACATCGCAAACGTCACGGCTAACTCTTACGTTATGTGCGCAGATAGCTCCGCTGCCCGCGTCATAAATGTCACACAGGGCTATCAGAAAATCTATAATATACAGCAAAAAACCAAACACAGAGCTTTTGAAGGTGAACCTGGTAGGTTAGATCCCAGGCGTAGAACAGTTTATCAGCGTCTTGCATTATAATGTACTGCAGGTCATAAATTGTCAGTCAGGGTCCCTACAAAACCACTGTTGGAAAAAAGTGGTAGAAATGCCACCAAATATAAAGTGAGATGGAGAAATCTGCAGCAATGTC…	AKR_YDL227C_HO chromosome4:46271-48031 - 692ATGCTTTCTGAAAACACGACTATTCTGATGGCTAACGGTGAAATTAAAGACATCGCAAACGTCACGGCTAACTCTTACGTTATGTGCGCAGATAGCTCCGCTGCCCGCGTCATAAATGTCACACAGGGCTATCAGAAAATCTATAATATACAGCAAAAAACCAAACACAGAGCTTTTGAAGGTGAACCTGGTAGGTTAGATCCCAGGCGTAGAACAGTTTATCAGCGTCTTGCATTATAATGTACTGCAGGTCATAAATTGTCAGTCAGGGTCCCTACAAAACCACTGTTGGAAAAAAGTGGTAGAAATGCCACCAAATATAAAGTGAGATGGAGAAATCTGCAGCAATGTCAGA…	ALA	notfound	notfound	GLY	notfound	notfound	notfound	notfound	LEU	notfound	notfound	LEU	notfound	notfound	36	2	Guayas, Ecuador	AKR	Fruit
BMF	no	> BMF_YDL227C_HO chromosome4:46271-48031 - 692 ATGCTTTCTGAAAACACGACTATTCTGATGGCTAACGGTGAAATTAAAGACATCGCAAACGTCACGGCTAACTCTTACGTTATGTGCGCAGATGGCTCCGCTGCCCGCGTCATAAATGTCACACAGGGCTATCAGAAAATCTATAATATACAGCAAAAAACCAAACACAGAGCTTTTGAAGGTGAACCTGGTAGGTTAGATCCCAGGCGTAGAACAGTTTATCAGCGTCTTGCATTACAATGTACTGCAGGTCATAAATTGTCAGTCAGGGTCCCTACCAAACCACTGTTGGAAAAAAGTGGTAGAAATGCCACCAAATATAAAGTGAGATGGAGAAATCTGCAGCAATGTC…	BMF_YDL227C_HO chromosome4:46271-48031 - 692ATGCTTTCTGAAAACACGACTATTCTGATGGCTAACGGTGAAATTAAAGACATCGCAAACGTCACGGCTAACTCTTACGTTATGTGCGCAGATGGCTCCGCTGCCCGCGTCATAAATGTCACACAGGGCTATCAGAAAATCTATAATATACAGCAAAAAACCAAACACAGAGCTTTTGAAGGTGAACCTGGTAGGTTAGATCCCAGGCGTAGAACAGTTTATCAGCGTCTTGCATTACAATGTACTGCAGGTCATAAATTGTCAGTCAGGGTCCCTACCAAACCACTGTTGGAAAAAAGTGGTAGAAATGCCACCAAATATAAAGTGAGATGGAGAAATCTGCAGCAATGTCAGA…	ALA	notfound	notfound	GLY	notfound	notfound	notfound	notfound	LEU	notfound	notfound	LEU	notfound	notfound	36	2	RVI Newcastle, UK	BMF	Human
ALA	no	> ALA_YDL227C_HO chromosome4:46271-48031 - 692 ATGCTTTCTGAAAACACGACTATTCTGATGGCTAACGGTGAAATTAAAGACATCGCAAACGTCACGGCTAACTCTTACGTTATGTGCGCAGATAGCTCCGCTGCCCGCGTCATAAATGTCACACAGGGCTATCAGAAAATCTATAATATACAGCAAAAAACCAAACACAGAGCTTTTGAAGGTGAACCTGGTAGGTTAGATCCCAGGCGTAGAACAGTTTATCAGCGTCTTGCATTATAATGTACTGCAGGTCATAAATTGTCAGTCAGGGTCCCTACAAAACCACTGTTGGAAAAAAGTGGTAGAAATGCCACCAAATATAAAGTGAGATGGAGAAATCTGCAGCAATGTC…	ALA_YDL227C_HO chromosome4:46271-48031 - 692ATGCTTTCTGAAAACACGACTATTCTGATGGCTAACGGTGAAATTAAAGACATCGCAAACGTCACGGCTAACTCTTACGTTATGTGCGCAGATAGCTCCGCTGCCCGCGTCATAAATGTCACACAGGGCTATCAGAAAATCTATAATATACAGCAAAAAACCAAACACAGAGCTTTTGAAGGTGAACCTGGTAGGTTAGATCCCAGGCGTAGAACAGTTTATCAGCGTCTTGCATTATAATGTACTGCAGGTCATAAATTGTCAGTCAGGGTCCCTACAAAACCACTGTTGGAAAAAAGTGGTAGAAATGCCACCAAATATAAAGTGAGATGGAGAAATCTGCAGCAATGTCAGA…	ALA	notfound	notfound	GLY	notfound	notfound	notfound	notfound	LEU	notfound	notfound	LEU	notfound	notfound	36	2	Pichincha, Ecuador	ALA	Insect
ALB	no	> ALB_YDL227C_HO chromosome4:46271-48031 - 692 ATGCTTTCTGAAAACACGACTATTCTGATGGCTAACGGTGAAATTAAAGACATCGCAAACGTCACGGCTAACTCTTACGTTATGTGCGCAGATAGCTCCGCTGCCCGCGTCATAAATGTCACACAGGGCTATCAGAAAATCTATAATATACAGCAAAAAACCAAACACAGAGCTTTTGAAGGTGAACCTGGTAGGTTAGATCCCAGGCGTAGAACAGTTTATCAGCGTCTTGCATTATAATGTACTGCAGGTCATAAATTGTCAGTCAGGGTCCCTACAAAACCACTGTTGGAAAAAAGTGGTAGAAATGCCACCAAATATAAAGTGAGATGGAGAAATCTGCAGCAATGTC…	ALB_YDL227C_HO chromosome4:46271-48031 - 692ATGCTTTCTGAAAACACGACTATTCTGATGGCTAACGGTGAAATTAAAGACATCGCAAACGTCACGGCTAACTCTTACGTTATGTGCGCAGATAGCTCCGCTGCCCGCGTCATAAATGTCACACAGGGCTATCAGAAAATCTATAATATACAGCAAAAAACCAAACACAGAGCTTTTGAAGGTGAACCTGGTAGGTTAGATCCCAGGCGTAGAACAGTTTATCAGCGTCTTGCATTATAATGTACTGCAGGTCATAAATTGTCAGTCAGGGTCCCTACAAAACCACTGTTGGAAAAAAGTGGTAGAAATGCCACCAAATATAAAGTGAGATGGAGAAATCTGCAGCAATGTCAGA…	ALA	notfound	notfound	GLY	notfound	notfound	notfound	notfound	LEU	notfound	notfound	LEU	notfound	notfound	36	2	Pichincha, Ecuador	ALB	Insect
ALC	no	> ALC_YDL227C_HO chromosome4:46271-48031 - 692 ATGCTTTCTGAAAACACGACTATTCTGATGGCTAACGGTGAAATTAAAGACATCGCAAACGTCACGGCTAACTCTTACGTTATGTGCGCAGATAGCTCCGCTGCCCGCGTCATAAATGTCACACAGGGCTATCAGAAAATCTATAATATACAGCAAAAAACCAAACACAGAGCTTTTGAAGGTGAACCTGGTAGGTTAGATCCCAGGCGTAGAACAGTTTATCAGCGTCTTGCATTATAATGTACTGCAGGTCATAAATTGTCAGTCAGGGTCCCTACAAAACCACTGTTGGAAAAAAGTGGTAGAAATGCCACCAAATATAAAGTGAGATGGAGAAATCTGCAGCAATGTC…	ALC_YDL227C_HO chromosome4:46271-48031 - 692ATGCTTTCTGAAAACACGACTATTCTGATGGCTAACGGTGAAATTAAAGACATCGCAAACGTCACGGCTAACTCTTACGTTATGTGCGCAGATAGCTCCGCTGCCCGCGTCATAAATGTCACACAGGGCTATCAGAAAATCTATAATATACAGCAAAAAACCAAACACAGAGCTTTTGAAGGTGAACCTGGTAGGTTAGATCCCAGGCGTAGAACAGTTTATCAGCGTCTTGCATTATAATGTACTGCAGGTCATAAATTGTCAGTCAGGGTCCCTACAAAACCACTGTTGGAAAAAAGTGGTAGAAATGCCACCAAATATAAAGTGAGATGGAGAAATCTGCAGCAATGTCAGA…	ALA	notfound	notfound	GLY	notfound	notfound	notfound	notfound	LEU	notfound	notfound	LEU	notfound	notfound	36	2	Cotopaxi, Ecuador	ALC	Nature
ALH	no	> ALH_YDL227C_HO chromosome4:46271-48031 - 692 ATGCTTTCTGAAAACACGACTATTCTGATGGCTAACGGTGAAATTAAAGACATCGCAAACGTCACGGCTAACTCTTACGTTATGTGCGCAGATAGCTCCGCTGCCCGCGTCATAAATGTCACACAGGGCTATCAGAAAATCTATAATATACAGCAAAAAACCAAACACAGAGCTTTTGAAGGTGAACCTGGTAGGTTAGATCCCAGGCGTAGAACAGTTTATCAGCGTCTTGCATTATAATGTACTGCAGGTCATAAATTGTCAGTCAGGGTCCCTACAAAACCACTGTTGGAAAAAAGTGGTAGAAATGCCACCAAATATAAAGTGAGATGGAGAAATCTGCAGCAATGTC…	ALH_YDL227C_HO chromosome4:46271-48031 - 692ATGCTTTCTGAAAACACGACTATTCTGATGGCTAACGGTGAAATTAAAGACATCGCAAACGTCACGGCTAACTCTTACGTTATGTGCGCAGATAGCTCCGCTGCCCGCGTCATAAATGTCACACAGGGCTATCAGAAAATCTATAATATACAGCAAAAAACCAAACACAGAGCTTTTGAAGGTGAACCTGGTAGGTTAGATCCCAGGCGTAGAACAGTTTATCAGCGTCTTGCATTATAATGTACTGCAGGTCATAAATTGTCAGTCAGGGTCCCTACAAAACCACTGTTGGAAAAAAGTGGTAGAAATGCCACCAAATATAAAGTGAGATGGAGAAATCTGCAGCAATGTCAGA…	ALA	notfound	notfound	GLY	notfound	notfound	notfound	notfound	LEU	notfound	notfound	LEU	notfound	notfound	36	2	Napo, Ecuador	ALH	Nature
CPT	no	> CPT_YDL227C_HO chromosome4:46271-48031 - 692 ATGCTTTCTGAAAACACGACTATTCTGATGGCTAACGGTGAAATTAAAGACATCGCAAACGTCACGGCTAACTCTTACGTTATGTGCGCAGATGGCTCCGCTGCCCGCGTCATAAATGTCACACAGGGCTATCAGAAAATCTATAATATACAGCAAAAAACCAAACACAGAGCTTTTGAAGGTGAACCTGGTAGGTTAGATCCCAGGCGTAGAACAGTTTATCAGCGTCTTGCATTACAATGTACTGCAGGTCATAAATTGTCAGTCAGGGTCCCTACCAAACCACTGTTGGAAAAAAGTGGTAGAAATGCCACCAAATATAAAGTGAGATGGAGAAATCTGCAGCAATGTC…	CPT_YDL227C_HO chromosome4:46271-48031 - 692ATGCTTTCTGAAAACACGACTATTCTGATGGCTAACGGTGAAATTAAAGACATCGCAAACGTCACGGCTAACTCTTACGTTATGTGCGCAGATGGCTCCGCTGCCCGCGTCATAAATGTCACACAGGGCTATCAGAAAATCTATAATATACAGCAAAAAACCAAACACAGAGCTTTTGAAGGTGAACCTGGTAGGTTAGATCCCAGGCGTAGAACAGTTTATCAGCGTCTTGCATTACAATGTACTGCAGGTCATAAATTGTCAGTCAGGGTCCCTACCAAACCACTGTTGGAAAAAAGTGGTAGAAATGCCACCAAATATAAAGTGAGATGGAGAAATCTGCAGCAATGTCAGA…	ALA	notfound	notfound	GLY	notfound	notfound	notfound	notfound	LEU	notfound	notfound	LEU	notfound	notfound	36	2	Burkina Faso	CPT	Palm wine
BRG	no	> BRG_YDL227C_HO chromosome4:46271-48031 - 692 ATGCTTTCTGAAAACACGACTATTCTGATGGCTAACGGTGAAATTAAAGACATCGCAAACGTCACGGCTAACTCTTACGTTATGTGCGCAGATAGCTCCGCTGCCCGCGTCATAAATGTCACACAGGGCTATCAGAAAATCTATAATATACAGCAAAAAACCAAACACAGAGCTTTTGAAGGTGAACCTGGTAGGTTAGATCCCAGGCGTAGAACAGTTTATCAGCGTCTTGCATTATAATGTACTGCAGGTCATAAATTGTCAGTCAGGGTCCCTACAAAACCACTGTTGGAAAAAAGTGGTAGAAATGCCACCAAATATAAAGTGAGATGGAGAAATCTGCAGCAATGTC…	BRG_YDL227C_HO chromosome4:46271-48031 - 692ATGCTTTCTGAAAACACGACTATTCTGATGGCTAACGGTGAAATTAAAGACATCGCAAACGTCACGGCTAACTCTTACGTTATGTGCGCAGATAGCTCCGCTGCCCGCGTCATAAATGTCACACAGGGCTATCAGAAAATCTATAATATACAGCAAAAAACCAAACACAGAGCTTTTGAAGGTGAACCTGGTAGGTTAGATCCCAGGCGTAGAACAGTTTATCAGCGTCTTGCATTATAATGTACTGCAGGTCATAAATTGTCAGTCAGGGTCCCTACAAAACCACTGTTGGAAAAAAGTGGTAGAAATGCCACCAAATATAAAGTGAGATGGAGAAATCTGCAGCAATGTCAGA…	ALA	notfound	notfound	GLY	notfound	notfound	notfound	notfound	LEU	notfound	notfound	LEU	notfound	notfound	36	2	District of Hamma Bouziane, Constantine, Algeria	BRG	Soil
ALK	no	> ALK_YDL227C_HO chromosome4:46271-48031 - 692 ATGCTTTCTGAAAACACGACTATTCTGATGGCTAACGGTGAAATTAAAGACATCGCAAACGTCACGGCTAACTCTTACGTTATGTGCGCAGATAGCTCCGCTGCCCGCGTCATAAATGTCACACAGGGCTATCAGAAAATCTATAATATACAGCAAAAAACCAAACACAGAGCTTTTGAAGGTGAACCTGGTAGGTTAGATCCCAGGCGTAGAACAGTTTATCAGCGTCTTGCATTATAATGTACTGCAGGTCATAAATTGTCAGTCAGGGTCCCTACAAAACCACTGTTGGAAAAAAGTGGTAGAAATGCCACCAAATATAAAGTGAGATGGAGAAATCTGCAGCAATGTC…	ALK_YDL227C_HO chromosome4:46271-48031 - 692ATGCTTTCTGAAAACACGACTATTCTGATGGCTAACGGTGAAATTAAAGACATCGCAAACGTCACGGCTAACTCTTACGTTATGTGCGCAGATAGCTCCGCTGCCCGCGTCATAAATGTCACACAGGGCTATCAGAAAATCTATAATATACAGCAAAAAACCAAACACAGAGCTTTTGAAGGTGAACCTGGTAGGTTAGATCCCAGGCGTAGAACAGTTTATCAGCGTCTTGCATTATAATGTACTGCAGGTCATAAATTGTCAGTCAGGGTCCCTACAAAACCACTGTTGGAAAAAAGTGGTAGAAATGCCACCAAATATAAAGTGAGATGGAGAAATCTGCAGCAATGTCAGA…	ALA	notfound	notfound	GLY	notfound	notfound	notfound	notfound	LEU	notfound	notfound	LEU	notfound	notfound	36	2	Galapagos, Ecuador	ALK	Tree
CGK	no	> CGK_YDL227C_HO chromosome4:46271-48031 - 692 ATGCTTTCTGAAAACACGACTATTCTGATGGCTAACGGTGAAATTAAAGACATCGCAAACGTCACGGCTAACTCTTACGTTATGTGCGCAGATAGCTCCGCTGCCCGCGTCATAAATGTCACACAGGGCTATCAGAAAATCTATAATATACAGCAAAAAACCAAACACAGAGCTTTTGAAGGTGAACCTGGTAGGTTAGATCCCAGGCGTAGAACAGTTTATCAGCGTCTTGCATTATAATGTACTGCAGGTCATAAATTGTCAGTCAGGGTCCCTACAAAACCACTGTTGGAAAAAAGTGGTAGAAATGCCACCAAATATAAAGTGAGATGGAGAAATCTGCAGCAATGTC…	CGK_YDL227C_HO chromosome4:46271-48031 - 692ATGCTTTCTGAAAACACGACTATTCTGATGGCTAACGGTGAAATTAAAGACATCGCAAACGTCACGGCTAACTCTTACGTTATGTGCGCAGATAGCTCCGCTGCCCGCGTCATAAATGTCACACAGGGCTATCAGAAAATCTATAATATACAGCAAAAAACCAAACACAGAGCTTTTGAAGGTGAACCTGGTAGGTTAGATCCCAGGCGTAGAACAGTTTATCAGCGTCTTGCATTATAATGTACTGCAGGTCATAAATTGTCAGTCAGGGTCCCTACAAAACCACTGTTGGAAAAAAGTGGTAGAAATGCCACCAAATATAAAGTGAGATGGAGAAATCTGCAGCAATGTCAGA…	ALA	notfound	notfound	GLY	notfound	notfound	notfound	notfound	LEU	notfound	notfound	LEU	notfound	notfound	36	2	Dong Thap, South Vietnam	CGK	Unknown
CGQ	no	> CGQ_YDL227C_HO chromosome4:46271-48031 - 692 ATGCTTTCTGAAAACACGACTATTCTGATGGCTAACGGTGAAATTAAAGACATCGCAAACGTCACGGCTAACTCTTACGTTATGTGCGCAGATAGCTCCGCTGCCCGCGTCATAAATGTCACACAGGGCTATCAGAAAATCTATAATATACAGCAAAAAACCAAACACAGAGCTTTTGAAGGTGAACCTGGTAGGTTAGATCCCAGGCGTAGAACAGTTTATCAGCGTCTTGCATTATAATGTACTGCAGGTCATAAATTGTCAGTCAGGGTCCCTACAAAACCACTGTTGGAAAAAAGTGGTAGAAATGCCACCAAATATAAAGTGAGATGGAGAAATCTGCAGCAATGTC…	CGQ_YDL227C_HO chromosome4:46271-48031 - 692ATGCTTTCTGAAAACACGACTATTCTGATGGCTAACGGTGAAATTAAAGACATCGCAAACGTCACGGCTAACTCTTACGTTATGTGCGCAGATAGCTCCGCTGCCCGCGTCATAAATGTCACACAGGGCTATCAGAAAATCTATAATATACAGCAAAAAACCAAACACAGAGCTTTTGAAGGTGAACCTGGTAGGTTAGATCCCAGGCGTAGAACAGTTTATCAGCGTCTTGCATTATAATGTACTGCAGGTCATAAATTGTCAGTCAGGGTCCCTACAAAACCACTGTTGGAAAAAAGTGGTAGAAATGCCACCAAATATAAAGTGAGATGGAGAAATCTGCAGCAATGTCAGA…	ALA	notfound	notfound	GLY	notfound	notfound	notfound	notfound	LEU	notfound	notfound	LEU	notfound	notfound	36	2	My Tho, South Vietnam	CGQ	Unknown
ARB	no	> ARB_YDL227C_HO chromosome4:46271-48031 - 692 ATGCTTTCTGAAAACACGACTATTCTGATGGCTAACGGTGAAATTAAAGACATCGCAAACGTCACGGCTAACTCTTACGTTATGTGCGCAGATGGCTCCGCTGCCCGCGTCATAAATGTCACACAGGGCTATCAGAAAATCTATAATATACAGCAAAAAACCAAACACAGAGCTTTTGAAGGTGAACCTGGTAGGTTAGATCCCAGGCATAGAACAGTTTATCAGCGTCTTGCATTACAATGTACTGCAGGTCATAAATTGTCAGTCAGGGTCCCTACCAAACCACTGTTGGAAAAAAGTGGTAGAAATGCCACCAAATATAAAGTGAGATGGAGAAATCTGCAGCAATGTC…	ARB_YDL227C_HO chromosome4:46271-48031 - 692ATGCTTTCTGAAAACACGACTATTCTGATGGCTAACGGTGAAATTAAAGACATCGCAAACGTCACGGCTAACTCTTACGTTATGTGCGCAGATGGCTCCGCTGCCCGCGTCATAAATGTCACACAGGGCTATCAGAAAATCTATAATATACAGCAAAAAACCAAACACAGAGCTTTTGAAGGTGAACCTGGTAGGTTAGATCCCAGGCATAGAACAGTTTATCAGCGTCTTGCATTACAATGTACTGCAGGTCATAAATTGTCAGTCAGGGTCCCTACCAAACCACTGTTGGAAAAAAGTGGTAGAAATGCCACCAAATATAAAGTGAGATGGAGAAATCTGCAGCAATGTCAGA…	ALA	notfound	notfound	GLY	notfound	notfound	notfound	notfound	LEU	notfound	notfound	LEU	notfound	notfound	notfound	3	NA	ARB	Bakery
CER	no	> CER_YDL227C_HO chromosome4:46271-48031 - 692 ATGCTTTCTGAAAACACGACTATTCTGATGGCTAACGGTGAAATTAAAGACATCGCAAACGTCACGGCTAACTCTTACGTTATGTGCGCAGATGGCTCCGCTGCCCGCGTCATAAATGTCACACAGGGCTATCAGAAAATCTATAATATACAGCAAAAAACCAAACACAGAGCTTTTGAAGGTGAACCTGGTAGGTTAGATCCCAGGCGTAGAACAGTTTATCAGCGTCTTGCATTACAATGTACTGCAGGTCATAAATTGTCAGTCAGGGTCCCTACCAAACCACTGTTGGAAAAAAGTGGTAGAAATGCCACTAAATATAAAGTGAGATGGAGAAATCTGCAGCAATGTC…	CER_YDL227C_HO chromosome4:46271-48031 - 692ATGCTTTCTGAAAACACGACTATTCTGATGGCTAACGGTGAAATTAAAGACATCGCAAACGTCACGGCTAACTCTTACGTTATGTGCGCAGATGGCTCCGCTGCCCGCGTCATAAATGTCACACAGGGCTATCAGAAAATCTATAATATACAGCAAAAAACCAAACACAGAGCTTTTGAAGGTGAACCTGGTAGGTTAGATCCCAGGCGTAGAACAGTTTATCAGCGTCTTGCATTACAATGTACTGCAGGTCATAAATTGTCAGTCAGGGTCCCTACCAAACCACTGTTGGAAAAAAGTGGTAGAAATGCCACTAAATATAAAGTGAGATGGAGAAATCTGCAGCAATGTCAGA…	ALA	notfound	notfound	GLY	notfound	notfound	notfound	notfound	LEU	notfound	notfound	LEU	notfound	notfound	notfound	3	Ghana	CER	Bakery
CES	no	> CES_YDL227C_HO chromosome4:46271-48031 - 692 ATGCTTTCTGAAAACACGACTATTCTGATGGCTAACGGTGAAATTAAAGACATCGCAAACGTCACGGCTAACTCTTACGTTATGTGCGCAGATGGCTCCGCTGCCCGCGTCATAAATGTCACACAGGGCTATCAGAAAATCTATAATATACAGCAAAAAACCAAACACAGAGCTTTTGAAGGTGAACCTGGTAGGTTAGATCCCAGGCGTAGAACAGTTTATCAGCGTCTTGCATTACAATGTACTGCAGGTCATAAATTGTCAGTCAGGGTCCCTACCAAACCACTGTTGGAAAAAAGTGGTAGAAATGCCACTAAATATAAAGTGAGATGGAGAAATCTGCAGCAATGTC…	CES_YDL227C_HO chromosome4:46271-48031 - 692ATGCTTTCTGAAAACACGACTATTCTGATGGCTAACGGTGAAATTAAAGACATCGCAAACGTCACGGCTAACTCTTACGTTATGTGCGCAGATGGCTCCGCTGCCCGCGTCATAAATGTCACACAGGGCTATCAGAAAATCTATAATATACAGCAAAAAACCAAACACAGAGCTTTTGAAGGTGAACCTGGTAGGTTAGATCCCAGGCGTAGAACAGTTTATCAGCGTCTTGCATTACAATGTACTGCAGGTCATAAATTGTCAGTCAGGGTCCCTACCAAACCACTGTTGGAAAAAAGTGGTAGAAATGCCACTAAATATAAAGTGAGATGGAGAAATCTGCAGCAATGTCAGA…	ALA	notfound	notfound	GLY	notfound	notfound	notfound	notfound	LEU	notfound	notfound	LEU	notfound	notfound	notfound	3	Ghana	CES	Bakery
AEN	no	> AEN_YDL227C_HO chromosome4:46271-48031 - 692 ATGCTTTCTGAAAACACGACTATTCTGATGGCTAACGGTGAAATTAAAGACATCGCAAACGTCACGGCTAACTCTTACGTTATGTGCGCAGATGGCTCCGCTGCCCGCGTCATAAATGTCACACAGGGCTATCAGAAAATCTATAATATACAGCAAAAAACCAAACACAGAGCTTTTGAAGGTGAACCTGGTAGGTTAGATCCCAGGCGTAGAACAGTTTATCAGCGTCTTGCATTACAATGTACTGCAGGTCATAAATTGTCAGTTAGGGTCCCTACCAAACCACTGTTGGAAAAAAGTGGTAGAAATGCCACCAAATATAAAGTGAGATGGAGAAATCTGCAGCAATGTC…	AEN_YDL227C_HO chromosome4:46271-48031 - 692ATGCTTTCTGAAAACACGACTATTCTGATGGCTAACGGTGAAATTAAAGACATCGCAAACGTCACGGCTAACTCTTACGTTATGTGCGCAGATGGCTCCGCTGCCCGCGTCATAAATGTCACACAGGGCTATCAGAAAATCTATAATATACAGCAAAAAACCAAACACAGAGCTTTTGAAGGTGAACCTGGTAGGTTAGATCCCAGGCGTAGAACAGTTTATCAGCGTCTTGCATTACAATGTACTGCAGGTCATAAATTGTCAGTTAGGGTCCCTACCAAACCACTGTTGGAAAAAAGTGGTAGAAATGCCACCAAATATAAAGTGAGATGGAGAAATCTGCAGCAATGTCAGA…	ALA	notfound	notfound	GLY	notfound	notfound	notfound	notfound	LEU	notfound	notfound	LEU	notfound	notfound	notfound	3	South Africa	AEN	Beer
AFA	no	> AFA_YDL227C_HO chromosome4:46271-48031 - 692 ATGCTTTCTGAAAACACGACTATTCTGATGGCTAACGGTGAAATTAAAGACATCGCAAACGTCACGGCTAACTCTTACGTTATGTGCGCAGATGGCTCCGCTGCCCGCGTCATAAATGTCACACAGGGCTATCAGAAAATCTATAATATACAGCAAAAAACCAAACACAGAGCTTTTGAAGGTGAACCTGGTAGGTTAGATCCCAGGCGTAGAACAGTTTATCAGCGTCTTGCATTACAATGTACTGCAGGTCATAAATTGTCAGTCAGGGTCCCTACCAAACCACTGTTGGAAAAAAGTGGTAGAAATGCCACCAAATATAAAGTGAGATGGAGAAATCTGCAGCAATGTC…	AFA_YDL227C_HO chromosome4:46271-48031 - 692ATGCTTTCTGAAAACACGACTATTCTGATGGCTAACGGTGAAATTAAAGACATCGCAAACGTCACGGCTAACTCTTACGTTATGTGCGCAGATGGCTCCGCTGCCCGCGTCATAAATGTCACACAGGGCTATCAGAAAATCTATAATATACAGCAAAAAACCAAACACAGAGCTTTTGAAGGTGAACCTGGTAGGTTAGATCCCAGGCGTAGAACAGTTTATCAGCGTCTTGCATTACAATGTACTGCAGGTCATAAATTGTCAGTCAGGGTCCCTACCAAACCACTGTTGGAAAAAAGTGGTAGAAATGCCACCAAATATAAAGTGAGATGGAGAAATCTGCAGCAATGTCAGA…	ALA	notfound	notfound	GLY	notfound	notfound	notfound	notfound	LEU	notfound	notfound	LEU	notfound	notfound	notfound	3	UK	AFA	Beer
AFP	no	> AFP_YDL227C_HO chromosome4:46271-48031 - 692 ATGCTTTCTGAAAACACGACTATTCTGATGGCTAACGGTGAAATTAAAGACATCGCAAACGTCACGGCTAACTCTTACGTTATGTGCGCAGATGGCTCCGCTGCCCGCGTCATAAATGTCACACAGGGCTATCAGAAAATCTATAATATACAGCAAAAAACCAAACACAGAGCTTTTGAAGGTGAACCTGGTAGGTTAGATCCCAGGCGTAGAACAGTTTATCAGCGTCTTGCATTACAATGTACTGCAGGTCATAAATTGTCAGTCAGGGTCCCTACCAAACCACTGTTGGAAAAAAGTGGTAGAAATGCCACCAAATATAAAGTGAGATGGAGAAATCTGCAGCAATGTC…	AFP_YDL227C_HO chromosome4:46271-48031 - 692ATGCTTTCTGAAAACACGACTATTCTGATGGCTAACGGTGAAATTAAAGACATCGCAAACGTCACGGCTAACTCTTACGTTATGTGCGCAGATGGCTCCGCTGCCCGCGTCATAAATGTCACACAGGGCTATCAGAAAATCTATAATATACAGCAAAAAACCAAACACAGAGCTTTTGAAGGTGAACCTGGTAGGTTAGATCCCAGGCGTAGAACAGTTTATCAGCGTCTTGCATTACAATGTACTGCAGGTCATAAATTGTCAGTCAGGGTCCCTACCAAACCACTGTTGGAAAAAAGTGGTAGAAATGCCACCAAATATAAAGTGAGATGGAGAAATCTGCAGCAATGTCAGA…	ALA	notfound	notfound	GLY	notfound	notfound	notfound	notfound	LEU	notfound	notfound	LEU	notfound	notfound	notfound	3	UK	AFP	Beer
ANL	no	> ANL_YDL227C_HO chromosome4:46271-48031 - 692 ATGCTTTCTGAAAACACGACTATTCTGATGGCTAACGGTGAAATTAARGACATCGCAAACGTCACGGCTAACTCTTACGTTATGTGCGCAGATGGCTCCGCTGCCCGCGTCATAAATGTCACACAGGGCTATCAGAAAATCTATAATATACAGCAAAAAACCAAACACAGAGCTTTTGAAGGTGAACCTGGTAGGTTAGATCCCAGGCGTAGAACAGTTTATCAGCGTCTTGCATTACAATGTACTGCAGGTCATAAATTGTCAGTCAGGGTCCCTACCAAACCACTGTTGGAAAAAAGTGGTAGAAATGCCACCAAATATAAAGTGAGATGGAGAAATCTGCAGCAATGTC…	ANL_YDL227C_HO chromosome4:46271-48031 - 692ATGCTTTCTGAAAACACGACTATTCTGATGGCTAACGGTGAAATTAARGACATCGCAAACGTCACGGCTAACTCTTACGTTATGTGCGCAGATGGCTCCGCTGCCCGCGTCATAAATGTCACACAGGGCTATCAGAAAATCTATAATATACAGCAAAAAACCAAACACAGAGCTTTTGAAGGTGAACCTGGTAGGTTAGATCCCAGGCGTAGAACAGTTTATCAGCGTCTTGCATTACAATGTACTGCAGGTCATAAATTGTCAGTCAGGGTCCCTACCAAACCACTGTTGGAAAAAAGTGGTAGAAATGCCACCAAATATAAAGTGAGATGGAGAAATCTGCAGCAATGTCAGA…	ALA	notfound	notfound	GLY	notfound	notfound	notfound	notfound	LEU	notfound	notfound	LEU	notfound	notfound	notfound	3	Ghana	ANL	Beer
ANM	no	> ANM_YDL227C_HO chromosome4:46271-48031 - 692 ATGCTTTCTGAAAACACGACTATTCTGATGGCTAACGGTGAAATTAAAGACATCGCAAACGTCACGGCTAACTCTTACGTTATGTGCGCAGATGGCTCCGCTGCCCGCGTCATAAATGTCACACAGGGCTATCAGAAAATCTATAATATACAGCAAAAAACCAAACACAGAGCTTTTGAAGGTGAACCTGGTAGGTTAGATCCCAGGCGTAGAACAGTTTATCAGCGTCTTGCATTACAATGTACTGCAGGTCATAAATTGTCAGTCAGGGTCCCTACCAAACCACTSTTGGAAAAAAGTGGTAGAAATGCCACCAAATATAAAGTGAGATGGAGAAATCTGCAGCAATGTC…	ANM_YDL227C_HO chromosome4:46271-48031 - 692ATGCTTTCTGAAAACACGACTATTCTGATGGCTAACGGTGAAATTAAAGACATCGCAAACGTCACGGCTAACTCTTACGTTATGTGCGCAGATGGCTCCGCTGCCCGCGTCATAAATGTCACACAGGGCTATCAGAAAATCTATAATATACAGCAAAAAACCAAACACAGAGCTTTTGAAGGTGAACCTGGTAGGTTAGATCCCAGGCGTAGAACAGTTTATCAGCGTCTTGCATTACAATGTACTGCAGGTCATAAATTGTCAGTCAGGGTCCCTACCAAACCACTSTTGGAAAAAAGTGGTAGAAATGCCACCAAATATAAAGTGAGATGGAGAAATCTGCAGCAATGTCAGA…	ALA	notfound	notfound	GLY	notfound	notfound	notfound	notfound	LEU	notfound	notfound	LEU	notfound	notfound	notfound	3	Ghana	ANM	Beer
APP	no	> APP_YDL227C_HO chromosome4:46271-48031 - 692 ATGCTTTCTGAAAACACGACTATTCTGATGGCTAACGGTGAAATTAAAGACATCGCAAACGTCACGGCTAACTCTTACGTTATGTGCGCAGATGGCTCCGCTGCCCGCGTCATAAATGTCACACAGGGCTATCAGAAAATCTATAATATACAGCAAAAAACCAAACACAGAGCTTTTGAAGGTGAACCTGGTAGGTTAGATCCCAGGCGTAGAACAGTTTATCAGCGTCTTGCATTACAATGTACTGCAGGTCATAAATTGTCAGTCAGGGTCCCTACCAAACCACTGTTGGAAAAAAGTGGTAGAAATGCCACCAAATATAAAGTGAGATGGAGAAATCTGCAGCAATGTC…	APP_YDL227C_HO chromosome4:46271-48031 - 692ATGCTTTCTGAAAACACGACTATTCTGATGGCTAACGGTGAAATTAAAGACATCGCAAACGTCACGGCTAACTCTTACGTTATGTGCGCAGATGGCTCCGCTGCCCGCGTCATAAATGTCACACAGGGCTATCAGAAAATCTATAATATACAGCAAAAAACCAAACACAGAGCTTTTGAAGGTGAACCTGGTAGGTTAGATCCCAGGCGTAGAACAGTTTATCAGCGTCTTGCATTACAATGTACTGCAGGTCATAAATTGTCAGTCAGGGTCCCTACCAAACCACTGTTGGAAAAAAGTGGTAGAAATGCCACCAAATATAAAGTGAGATGGAGAAATCTGCAGCAATGTCAGA…	ALA	notfound	notfound	GLY	notfound	notfound	notfound	notfound	LEU	notfound	notfound	LEU	notfound	notfound	notfound	3	Brazil, Rio de Janeiro	APP	Beer
APR	no	> APR_YDL227C_HO chromosome4:46271-48031 - 692 ATGCTTTCTGAAAACACGACTATTCTGATGGCTAACGGTGAAATTAAAGACATCGCAAACGTCACGGCTAACTCTTACGTTATGTGCGCAGATGGCTCCGCTGCCCGCGTCATAAATGTCACACAGGGCTATCAGAAAATCTATAATATACAGCAAAAAACCAAACACAGAGCTTTTGAAGGTGAACCTGGTAGGTTAGATCCCAGGCGTAGAACAGTTTATCAGCGTCTTGCATTACAATGTACTGCAGGTCATAAATTGTCAGTCAGGGTCCCTACCAAACCACTGTTGGAAAAAAGTGGTAGAAATGCCACCAAATATAAAGTGAGATGGAGAAATCTGCAGCAATGTC…	APR_YDL227C_HO chromosome4:46271-48031 - 692ATGCTTTCTGAAAACACGACTATTCTGATGGCTAACGGTGAAATTAAAGACATCGCAAACGTCACGGCTAACTCTTACGTTATGTGCGCAGATGGCTCCGCTGCCCGCGTCATAAATGTCACACAGGGCTATCAGAAAATCTATAATATACAGCAAAAAACCAAACACAGAGCTTTTGAAGGTGAACCTGGTAGGTTAGATCCCAGGCGTAGAACAGTTTATCAGCGTCTTGCATTACAATGTACTGCAGGTCATAAATTGTCAGTCAGGGTCCCTACCAAACCACTGTTGGAAAAAAGTGGTAGAAATGCCACCAAATATAAAGTGAGATGGAGAAATCTGCAGCAATGTCAGA…	ALA	notfound	notfound	GLY	notfound	notfound	notfound	notfound	LEU	notfound	notfound	LEU	notfound	notfound	notfound	3	West Africa	APR	Beer
AVN	no	> AVN_YDL227C_HO chromosome4:46271-48031 - 692 ATGCTTTCTGAAAACACGACTATTCTGATGGCTAACGGTGAAATTAAAGACATCGCAAACGTCACGGCTAACTCTTACGTTATGTGCGCAGATGGCTCCGCTGCCCGCGTCATAAATGTCACACAGGGCTATCAGAAAATCTATAATATACAGCAAAAAACCAAACACAGAGCTTTTGAAGGTGAACCTGGTAGGTTAGATCCCAGGCGTAGAACAGTTTATCAGCGTCTTGCATTACAATGTACTGCAGGTCATAAATTGTCAGTCAGGGTCCCTACCAAACCACTGTTGGAAAAAAGTGGTAGAAATGCCACCAAATATAAAGTGAGATGGAGAAATCTGCAGCAATGTC…	AVN_YDL227C_HO chromosome4:46271-48031 - 692ATGCTTTCTGAAAACACGACTATTCTGATGGCTAACGGTGAAATTAAAGACATCGCAAACGTCACGGCTAACTCTTACGTTATGTGCGCAGATGGCTCCGCTGCCCGCGTCATAAATGTCACACAGGGCTATCAGAAAATCTATAATATACAGCAAAAAACCAAACACAGAGCTTTTGAAGGTGAACCTGGTAGGTTAGATCCCAGGCGTAGAACAGTTTATCAGCGTCTTGCATTACAATGTACTGCAGGTCATAAATTGTCAGTCAGGGTCCCTACCAAACCACTGTTGGAAAAAAGTGGTAGAAATGCCACCAAATATAAAGTGAGATGGAGAAATCTGCAGCAATGTCAGA…	ALA	notfound	notfound	GLY	notfound	notfound	notfound	notfound	LEU	notfound	notfound	LEU	notfound	notfound	notfound	3	Abengourou, Ivory Coast	AVN	Beer
AVP	no	> AVP_YDL227C_HO chromosome4:46271-48031 - 692 ATGCTTTCTGAAAACACGACTATTCTGATGGCTAACGGTGAAATTAAAGACATCGCAAACGTCACGGCTAACTCTTACGTTATGTGCGCAGATGGCTCCGCTGCCCGCGTCATAAATGTCACACAGGGCTATCAGAAAATCTATAATATACAGCAAAAAACCAAACACAGAGCTTTTGAAGGTGAACCTGGTAGGTTAGATCCCAGGCGTAGAACAGTTTATCAGCGTCTTGCATTACAATGTACTGCAGGTCATAAATTGTCAGTCAGGGTCCCTACCAAACCACTGTTGGAAAAAAGTGGTAGAAATGCCACCAAATATAAAGTGAGATGGAGAAATCTGCAGCAATGTC…	AVP_YDL227C_HO chromosome4:46271-48031 - 692ATGCTTTCTGAAAACACGACTATTCTGATGGCTAACGGTGAAATTAAAGACATCGCAAACGTCACGGCTAACTCTTACGTTATGTGCGCAGATGGCTCCGCTGCCCGCGTCATAAATGTCACACAGGGCTATCAGAAAATCTATAATATACAGCAAAAAACCAAACACAGAGCTTTTGAAGGTGAACCTGGTAGGTTAGATCCCAGGCGTAGAACAGTTTATCAGCGTCTTGCATTACAATGTACTGCAGGTCATAAATTGTCAGTCAGGGTCCCTACCAAACCACTGTTGGAAAAAAGTGGTAGAAATGCCACCAAATATAAAGTGAGATGGAGAAATCTGCAGCAATGTCAGA…	ALA	notfound	notfound	GLY	notfound	notfound	notfound	notfound	LEU	notfound	notfound	LEU	notfound	notfound	notfound	3	Abengourou, Ivory Coast	AVP	Beer
AVQ	no	> AVQ_YDL227C_HO chromosome4:46271-48031 - 692 ATGCTTTCTGAAAACACGACTATTCTGATGGCTAACGGTGAAATTAAAGACATCGCAAACGTCACGGCTAACTCTTACGTTATGTGCGCAGATGGCTCCGCTGCCCGCGTCATAAATGTCACACAGGGCTATCAGAAAATCTATAATATACAGCAAAAAACCAAACACAGAGCTTTTGAAGGTGAACCTGGTAGGTTAGATCCCAGGCGTAGAACAGTTTATCAGCGTCTTGCATTACAATGTACTGCAGGTCATAAATTGTCAGTCAGGGTCCCTACCAAACCACTGTTGGAAAAAAGTGGTAGAAATGCCACCAAATATAAAGTGAGATGGAGAAATCTGCAGCAATGTC…	AVQ_YDL227C_HO chromosome4:46271-48031 - 692ATGCTTTCTGAAAACACGACTATTCTGATGGCTAACGGTGAAATTAAAGACATCGCAAACGTCACGGCTAACTCTTACGTTATGTGCGCAGATGGCTCCGCTGCCCGCGTCATAAATGTCACACAGGGCTATCAGAAAATCTATAATATACAGCAAAAAACCAAACACAGAGCTTTTGAAGGTGAACCTGGTAGGTTAGATCCCAGGCGTAGAACAGTTTATCAGCGTCTTGCATTACAATGTACTGCAGGTCATAAATTGTCAGTCAGGGTCCCTACCAAACCACTGTTGGAAAAAAGTGGTAGAAATGCCACCAAATATAAAGTGAGATGGAGAAATCTGCAGCAATGTCAGA…	ALA	notfound	notfound	GLY	notfound	notfound	notfound	notfound	LEU	notfound	notfound	LEU	notfound	notfound	notfound	3	Abengourou, Ivory Coast	AVQ	Beer
AVR	no	> AVR_YDL227C_HO chromosome4:46271-48031 - 692 ATGCTTTCTGAAAACACGACTATTCTGATGGCTAACGGTGAAATTAAAGACATCGCAAACGTCACGGCTAACTCTTACGTTATGTGCGCAGATGGCTCCGCTGCCCGCGTCATAAATGTCACACAGGGCTATCAGAAAATCTATAATATACAGCAAAAAACCAAACACAGAGCTTTTGAAGGTGAACCTGGTAGGTTAGATCCCAGGCGTAGAACAGTTTATCAGCGTCTTGCATTACAATGTACTGCAGGTCATAAATTGTCAGTCAGGGTCCCTACCAAACCACTGTTGGAAAAAAGTGGTAGAAATGCCACCAAATATAAAGTGAGATGGAGAAATCTGCAGCAATGTC…	AVR_YDL227C_HO chromosome4:46271-48031 - 692ATGCTTTCTGAAAACACGACTATTCTGATGGCTAACGGTGAAATTAAAGACATCGCAAACGTCACGGCTAACTCTTACGTTATGTGCGCAGATGGCTCCGCTGCCCGCGTCATAAATGTCACACAGGGCTATCAGAAAATCTATAATATACAGCAAAAAACCAAACACAGAGCTTTTGAAGGTGAACCTGGTAGGTTAGATCCCAGGCGTAGAACAGTTTATCAGCGTCTTGCATTACAATGTACTGCAGGTCATAAATTGTCAGTCAGGGTCCCTACCAAACCACTGTTGGAAAAAAGTGGTAGAAATGCCACCAAATATAAAGTGAGATGGAGAAATCTGCAGCAATGTCAGA…	ALA	notfound	notfound	GLY	notfound	notfound	notfound	notfound	LEU	notfound	notfound	LEU	notfound	notfound	notfound	3	Abengourou, Ivory Coast	AVR	Beer
AVS	no	> AVS_YDL227C_HO chromosome4:46271-48031 - 692 ATGCTTTCTGAAAACACGACTATTCTGATGGCTAACGGTGAAATTAARGACATCGCAAACGTCACGGCTAACTCTTACGTTATGTGCGCAGATGGCTCCGCTGCCCGCGTCATAAATGTCACACAGGGCTATCAGAAAATCTATAATATACAGCAAAAAACCAAACACAGAGCTTTTGAAGGTGAACCTGGTAGGTTAGATCCCAGGCGTAGAACAGTTTATCAGCGTCTTGCATTACAATGTACTGCAGGTCATAAATTGTCAGTCAGGGTCCCTACCAAACCACTGTTGGAAAAAAGTGGTAGAAATGCCACCAAATATAAAGTGAGATGGAGAAATCTGCAGCAATGTC…	AVS_YDL227C_HO chromosome4:46271-48031 - 692ATGCTTTCTGAAAACACGACTATTCTGATGGCTAACGGTGAAATTAARGACATCGCAAACGTCACGGCTAACTCTTACGTTATGTGCGCAGATGGCTCCGCTGCCCGCGTCATAAATGTCACACAGGGCTATCAGAAAATCTATAATATACAGCAAAAAACCAAACACAGAGCTTTTGAAGGTGAACCTGGTAGGTTAGATCCCAGGCGTAGAACAGTTTATCAGCGTCTTGCATTACAATGTACTGCAGGTCATAAATTGTCAGTCAGGGTCCCTACCAAACCACTGTTGGAAAAAAGTGGTAGAAATGCCACCAAATATAAAGTGAGATGGAGAAATCTGCAGCAATGTCAGA…	ALA	notfound	notfound	GLY	notfound	notfound	notfound	notfound	LEU	notfound	notfound	LEU	notfound	notfound	notfound	3	Abengourou, Ivory Coast	AVS	Beer
AVT	no	> AVT_YDL227C_HO chromosome4:46271-48031 - 692 ATGCTTTCTGAAAACACGACTATTCTGATGGCTAACGGTGAAATTAAAGACATCGCAAACGTCACGGCTAACTCTTACGTTATGTGCGCAGATGGCTCCGCTGCCCGCGTCATAAATGTCACACAGGGCTATCAGAAAATCTATAATATACAGCAAAAAACCAAACACAGAGCTTTTGAAGGTGAACCTGGTAGGTTAGATCCCAGGCGTAGAACAGTTTATCAGCGTCTTGCATTACAATGTACTGCAGGTCATAAATTGTCAGTCAGGGTCCCTACCAAACCACTGTTGGAAAAAAGTGGTAGAAATGCCACCAAATATAAAGTGAGATGGAGAAATCTGCAGCAATGTC…	AVT_YDL227C_HO chromosome4:46271-48031 - 692ATGCTTTCTGAAAACACGACTATTCTGATGGCTAACGGTGAAATTAAAGACATCGCAAACGTCACGGCTAACTCTTACGTTATGTGCGCAGATGGCTCCGCTGCCCGCGTCATAAATGTCACACAGGGCTATCAGAAAATCTATAATATACAGCAAAAAACCAAACACAGAGCTTTTGAAGGTGAACCTGGTAGGTTAGATCCCAGGCGTAGAACAGTTTATCAGCGTCTTGCATTACAATGTACTGCAGGTCATAAATTGTCAGTCAGGGTCCCTACCAAACCACTGTTGGAAAAAAGTGGTAGAAATGCCACCAAATATAAAGTGAGATGGAGAAATCTGCAGCAATGTCAGA…	ALA	notfound	notfound	GLY	notfound	notfound	notfound	notfound	LEU	notfound	notfound	LEU	notfound	notfound	notfound	3	Abengourou, Ivory Coast	AVT	Beer
BEI	no	> BEI_YDL227C_HO chromosome4:46271-48031 - 692 ATGCTTTCTGAAAACACGACTATTCTGATGGCTAACGGTGAAATTAAAGACATCGCAAACGTCACGGCTAACTCTTACGTTATGTGCGCAGATGGCTCCGCTGCCCGCGTCATAAATGTCACACAGGGCTATCAGAAAATCTATAATATACAGCAAAAAACCAAACACAGAGCTTTTGAAGGTGAACCTGGTAGGTTAGATCCCAGGCGTAGAACAGTTTATCAGCGTCTTGCATTACAATGAACTGCAGGTCATAAATTGTCAGTCAGGGTCCCTACCAAACCACTGTTGGAAAAAAGTGGTAGAAATGCCACCAAATATAAAGTGAGATGGAGAAATCTGCAGCAATGTC…	BEI_YDL227C_HO chromosome4:46271-48031 - 692ATGCTTTCTGAAAACACGACTATTCTGATGGCTAACGGTGAAATTAAAGACATCGCAAACGTCACGGCTAACTCTTACGTTATGTGCGCAGATGGCTCCGCTGCCCGCGTCATAAATGTCACACAGGGCTATCAGAAAATCTATAATATACAGCAAAAAACCAAACACAGAGCTTTTGAAGGTGAACCTGGTAGGTTAGATCCCAGGCGTAGAACAGTTTATCAGCGTCTTGCATTACAATGAACTGCAGGTCATAAATTGTCAGTCAGGGTCCCTACCAAACCACTGTTGGAAAAAAGTGGTAGAAATGCCACCAAATATAAAGTGAGATGGAGAAATCTGCAGCAATGTCAGA…	ALA	notfound	notfound	GLY	notfound	notfound	notfound	notfound	LEU	notfound	notfound	LEU	notfound	notfound	notfound	3	Chad	BEI	Beer
BEK	no	> BEK_YDL227C_HO chromosome4:46271-48031 - 692 ATGCTTTCTGAAAACACGACTATTCTGATGGCTAACGGTGAAATTAAAGACATCGCAAACGTCACGGCTAACTCTTACGTTATGTGCGCAGATGGCTCCGCTGCCCGCGTCATAAATGTCACACAGGGCTATCAGAAAATCTATAATATACAGCAAAAAACCAAACACAAAGCTTTTGAAGGTGAACCTGGTAGGTTAGATCCCAGGCGTAGAACAGTTTATCAGCGTCTTGCATTACAATGTACTGCAGGTCATAAATTGTCAGTCAGGGTCCCTACCAAACCACTGTTGGAAAAAAGTGGTAGAAATGCCACCAAATATAAAGTGAGATGGAGAAATCTGCAGCAATGTC…	BEK_YDL227C_HO chromosome4:46271-48031 - 692ATGCTTTCTGAAAACACGACTATTCTGATGGCTAACGGTGAAATTAAAGACATCGCAAACGTCACGGCTAACTCTTACGTTATGTGCGCAGATGGCTCCGCTGCCCGCGTCATAAATGTCACACAGGGCTATCAGAAAATCTATAATATACAGCAAAAAACCAAACACAAAGCTTTTGAAGGTGAACCTGGTAGGTTAGATCCCAGGCGTAGAACAGTTTATCAGCGTCTTGCATTACAATGTACTGCAGGTCATAAATTGTCAGTCAGGGTCCCTACCAAACCACTGTTGGAAAAAAGTGGTAGAAATGCCACCAAATATAAAGTGAGATGGAGAAATCTGCAGCAATGTCAGA…	ALA	notfound	notfound	GLY	notfound	notfound	notfound	notfound	LEU	notfound	notfound	LEU	notfound	notfound	notfound	3	Chad	BEK	Beer
BEM	no	> BEM_YDL227C_HO chromosome4:46271-48031 - 692 ATGCTTTCTGAAAACACGACTATTCTGATGGCTAACGGTGAAATTAAAGACATCGCAAACGTCACGGCTAACTCTTACGTTATGTGCGCAGATGGCTCCGCTGCCCGCGTCATAAATGTCACACAGGGCTATCAGAAAATCTATAATATACAGCAAAAAACCAAACACAAAGCTTTTGAAGGTGAACCTGGTAGGTTAGATCCCAGGCGTAGAACAGTTTATCAGCGTCTTGCATTACAATGTACTGCAGGTCATAAATTGTCAGTCAGGGTCCCTACCAAACCACTGTTGGAAAAAAGTGGTAGAAATGCCACCAAATATAAAGTGAGATGGAGAAATCTGCAGCAATGTC…	BEM_YDL227C_HO chromosome4:46271-48031 - 692ATGCTTTCTGAAAACACGACTATTCTGATGGCTAACGGTGAAATTAAAGACATCGCAAACGTCACGGCTAACTCTTACGTTATGTGCGCAGATGGCTCCGCTGCCCGCGTCATAAATGTCACACAGGGCTATCAGAAAATCTATAATATACAGCAAAAAACCAAACACAAAGCTTTTGAAGGTGAACCTGGTAGGTTAGATCCCAGGCGTAGAACAGTTTATCAGCGTCTTGCATTACAATGTACTGCAGGTCATAAATTGTCAGTCAGGGTCCCTACCAAACCACTGTTGGAAAAAAGTGGTAGAAATGCCACCAAATATAAAGTGAGATGGAGAAATCTGCAGCAATGTCAGA…	ALA	notfound	notfound	GLY	notfound	notfound	notfound	notfound	LEU	notfound	notfound	LEU	notfound	notfound	notfound	3	Chad	BEM	Beer
BEN	no	> BEN_YDL227C_HO chromosome4:46271-48031 - 692 ATGCTTTCTGAAAACACGACTATTCTGATGGCTAACGGTGAAATTAAAGACATCGCAAACGTCACGGCTAACTCTTACGTTATGTGCGCAGATGGCTCCGCTGCCCGCGTCATAAATGTCACACAGGGCTATCAGAAAATCTATAATATACAGCAAAAAACCAAACACAGAGCTTTTGAAGGTGAACCTGGTAGGTTAGATCCCAGGCGTAGAACAGTTTATCAGCGTCTTGCATTACAATGAACTGCAGGTCATAAATTGTCAGTCAGGGTCCCTACCAAACCACTGTTGGAAAAAAGTGGTAGAAATGCCACCAAATATAAAGTGAGATGGAGAAATCTGCAGCAATGTC…	BEN_YDL227C_HO chromosome4:46271-48031 - 692ATGCTTTCTGAAAACACGACTATTCTGATGGCTAACGGTGAAATTAAAGACATCGCAAACGTCACGGCTAACTCTTACGTTATGTGCGCAGATGGCTCCGCTGCCCGCGTCATAAATGTCACACAGGGCTATCAGAAAATCTATAATATACAGCAAAAAACCAAACACAGAGCTTTTGAAGGTGAACCTGGTAGGTTAGATCCCAGGCGTAGAACAGTTTATCAGCGTCTTGCATTACAATGAACTGCAGGTCATAAATTGTCAGTCAGGGTCCCTACCAAACCACTGTTGGAAAAAAGTGGTAGAAATGCCACCAAATATAAAGTGAGATGGAGAAATCTGCAGCAATGTCAGA…	ALA	notfound	notfound	GLY	notfound	notfound	notfound	notfound	LEU	notfound	notfound	LEU	notfound	notfound	notfound	3	Chad	BEN	Beer
BHA	no	> BHA_YDL227C_HO chromosome4:46271-48031 - 692 ATGCTTTCTGAAAACACGACTATTCTGATGGCTAACGGTGAAATTAAAGACATCGCAAACGTCACGGCTAACTCTTACGTTATGTGCGCAGATGGCTCCGCTGCCCGCGTCATAAATGTCACACAGGGCTATCAGAAAATCTATAATATACAGCAAAAAACCAAACACAGAGCTTTTGAAGGTGAACCTGGTAGGTTAGATCCCAGGCGTAGAACAGTTTATCAGCGTCTTGCATTACAATGAACTGCAGGTCATAAATTGTCAGTCAGGGTCCCTACCAAACCACTGTTGGAAAAAAGTGGTAGAAATGCCACCAAATATAAAGTGAGATGGAGAAATCTGCAGCAATGTC…	BHA_YDL227C_HO chromosome4:46271-48031 - 692ATGCTTTCTGAAAACACGACTATTCTGATGGCTAACGGTGAAATTAAAGACATCGCAAACGTCACGGCTAACTCTTACGTTATGTGCGCAGATGGCTCCGCTGCCCGCGTCATAAATGTCACACAGGGCTATCAGAAAATCTATAATATACAGCAAAAAACCAAACACAGAGCTTTTGAAGGTGAACCTGGTAGGTTAGATCCCAGGCGTAGAACAGTTTATCAGCGTCTTGCATTACAATGAACTGCAGGTCATAAATTGTCAGTCAGGGTCCCTACCAAACCACTGTTGGAAAAAAGTGGTAGAAATGCCACCAAATATAAAGTGAGATGGAGAAATCTGCAGCAATGTCAGA…	ALA	notfound	notfound	GLY	notfound	notfound	notfound	notfound	LEU	notfound	notfound	LEU	notfound	notfound	notfound	3	Chad	BHA	Beer
BRQ	no	> BRQ_YDL227C_HO chromosome4:46271-48031 - 692 ATGCTTTCTGAAAACACGACTATTCTGATGGCTAACGGTGAAATTAAAGACATCGCAAACGTCACGGCTAACTCTTACGTTATGTGCGCAGATGGCTCCGCTGCCCGCGTCATAAATGTCACACAGGGCTATCAGAAAATCTATAATATACAGCAAAAAACCAAACACAGAGCTTTTGAAGGTGAACCTGGTAGGTTAGATCCCAGGCGTAGAACAGTTTATCAGCGTCTTGCATTACAATGTACTGCAGGTCATAAATTGTCAGTCAGGGTCCCTACCAAACCACTGTTGGAAAAAAGTGGTAGAAATGCCACCAAATATAAAGTGAGATGGAGAAATCTGCAGCAATGTC…	BRQ_YDL227C_HO chromosome4:46271-48031 - 692ATGCTTTCTGAAAACACGACTATTCTGATGGCTAACGGTGAAATTAAAGACATCGCAAACGTCACGGCTAACTCTTACGTTATGTGCGCAGATGGCTCCGCTGCCCGCGTCATAAATGTCACACAGGGCTATCAGAAAATCTATAATATACAGCAAAAAACCAAACACAGAGCTTTTGAAGGTGAACCTGGTAGGTTAGATCCCAGGCGTAGAACAGTTTATCAGCGTCTTGCATTACAATGTACTGCAGGTCATAAATTGTCAGTCAGGGTCCCTACCAAACCACTGTTGGAAAAAAGTGGTAGAAATGCCACCAAATATAAAGTGAGATGGAGAAATCTGCAGCAATGTCAGA…	ALA	notfound	notfound	GLY	notfound	notfound	notfound	notfound	LEU	notfound	notfound	LEU	notfound	notfound	notfound	3	Belgium	BRQ	Beer
CBN	no	> CBN_YDL227C_HO chromosome4:46271-48031 - 692 ATGCTTTCTGAAAACACGACTATTCTGATGGCTAACGGTGAAATTAAAGACATCGCAAACGTCACGGCTAACTCTTACGTTATGTGCGCAGATGGCTCCGCTGCCCGCGTCATAAATGTCACACAGGGCTATCAGAAAATCTATAATATACAGCAAAAAACCAAACACAGAGCTTTTGAAGGTGAACCTGGTAGGTTAGATCCCAGGCGTAGAACAGTTTATCAGCGTCTTGCATTACAATGTACTGCAGGTCATAAATTGTCAGTCAGGGTCCCTACCAAACCACTGTTGGAAAAAAGTGGTAGAAATGCCACCAAATATAAAGTGAGATGGAGAAATCTGCAGCAATGTC…	CBN_YDL227C_HO chromosome4:46271-48031 - 692ATGCTTTCTGAAAACACGACTATTCTGATGGCTAACGGTGAAATTAAAGACATCGCAAACGTCACGGCTAACTCTTACGTTATGTGCGCAGATGGCTCCGCTGCCCGCGTCATAAATGTCACACAGGGCTATCAGAAAATCTATAATATACAGCAAAAAACCAAACACAGAGCTTTTGAAGGTGAACCTGGTAGGTTAGATCCCAGGCGTAGAACAGTTTATCAGCGTCTTGCATTACAATGTACTGCAGGTCATAAATTGTCAGTCAGGGTCCCTACCAAACCACTGTTGGAAAAAAGTGGTAGAAATGCCACCAAATATAAAGTGAGATGGAGAAATCTGCAGCAATGTCAGA…	ALA	notfound	notfound	GLY	notfound	notfound	notfound	notfound	LEU	notfound	notfound	LEU	notfound	notfound	notfound	3	UK	CBN	Beer
CPB	no	> CPB_YDL227C_HO chromosome4:46271-48031 - 692 ATGCTTTCTGAAAACACGACTATTCTGATGGCTAACGGTGAAATTAAAGACATCGCAAACGTCACGGCTAACTCTTACGTTATGTGCGCAGATGGCTCCGCTGCCCGCGTCATAAATGTCACACAGGGCTATCAGAAAATCTATAATATACAGCAAAAAACCAAACACAGAGCTTTTGAAGGTGAACCTGGTAGGTTAGATCCCAGGCGTAGAACAGTTTATCAGCGTCTTGCATTACAATGTACTGCAGGTCATAAATTGTCAGTCAGGGTCCCTACCAAACCACTGTTGGAAAAAAGTGGTAGAAATGCCACCAAATATAAAGTGAGATGGAGAAATCTGCAGCAATGTC…	CPB_YDL227C_HO chromosome4:46271-48031 - 692ATGCTTTCTGAAAACACGACTATTCTGATGGCTAACGGTGAAATTAAAGACATCGCAAACGTCACGGCTAACTCTTACGTTATGTGCGCAGATGGCTCCGCTGCCCGCGTCATAAATGTCACACAGGGCTATCAGAAAATCTATAATATACAGCAAAAAACCAAACACAGAGCTTTTGAAGGTGAACCTGGTAGGTTAGATCCCAGGCGTAGAACAGTTTATCAGCGTCTTGCATTACAATGTACTGCAGGTCATAAATTGTCAGTCAGGGTCCCTACCAAACCACTGTTGGAAAAAAGTGGTAGAAATGCCACCAAATATAAAGTGAGATGGAGAAATCTGCAGCAATGTCAGA…	ALA	notfound	notfound	GLY	notfound	notfound	notfound	notfound	LEU	notfound	notfound	LEU	notfound	notfound	notfound	3	Hungary	CPB	Beer
SACE_YAG	no	> SACE_YAG_YDL227C_HO chromosome4:46271-48031 - 692 ATGCTTTCTGAAAACACGACTATTCTGATGGCTAACGGTGAAATTAAAGACATCGCAAACGTCACGGCTAACTCTTACGTTATGTGCGCAGATGGCTCCGCTGCCCGCGTCATAAATGTCACACAGGGCTATCAGAAAATCTATAATATACAGCAAAAAACCAAACACAGAGCTTTTGAAGGTGAACCTGGTAGGTTAGATCCCAGGCGTAGAACAGTTTATCAGCGTCTTGCATTACAATGTACTGCAGGTCATAAATTGTCAGTCAGGGTCCCTACCAAACCACTGTTGGAAAAAAGTGGTAGAAATGCCACCAAATATAAAGTGAGATGGAGAAATCTGCAGCA…	SACE_YAG_YDL227C_HO chromosome4:46271-48031 - 692ATGCTTTCTGAAAACACGACTATTCTGATGGCTAACGGTGAAATTAAAGACATCGCAAACGTCACGGCTAACTCTTACGTTATGTGCGCAGATGGCTCCGCTGCCCGCGTCATAAATGTCACACAGGGCTATCAGAAAATCTATAATATACAGCAAAAAACCAAACACAGAGCTTTTGAAGGTGAACCTGGTAGGTTAGATCCCAGGCGTAGAACAGTTTATCAGCGTCTTGCATTACAATGTACTGCAGGTCATAAATTGTCAGTCAGGGTCCCTACCAAACCACTGTTGGAAAAAAGTGGTAGAAATGCCACCAAATATAAAGTGAGATGGAGAAATCTGCAGCAATG…	ALA	notfound	notfound	GLY	notfound	notfound	notfound	notfound	LEU	notfound	notfound	LEU	notfound	notfound	notfound	3	NA	SACE_YAG	Beer
SACE_YCV	no	> SACE_YCV_YDL227C_HO chromosome4:46271-48031 - 692 ATGCTTTCTGAAAACACGACTATTCTGATGGCTAACGGTGAAATTAAAGACATCGCAAACGTCACGGCTAACTCTTACGTTATGTGCGCAGATGGCTCCGCTGCCCGCGTCATAAATGTCACACAGGGCTATCAGAAAATCTATAATATACAGCAAAAAACCAAACACAGAGCTTTTGAAGGTGAACCTGGTAGGTTAGATCCCAGGCGTAGAACAGTTTATCAGCGTCTTGCATTACAATGTACTGCAGGTCATAAATTGTCAGTCAGGGTCCCTACCAAACCACTGTTGGAAAAAAGTGGTAGAAATGCCACCAAATATAAAGTGAGATGGAGAAATCTGCAGCA…	SACE_YCV_YDL227C_HO chromosome4:46271-48031 - 692ATGCTTTCTGAAAACACGACTATTCTGATGGCTAACGGTGAAATTAAAGACATCGCAAACGTCACGGCTAACTCTTACGTTATGTGCGCAGATGGCTCCGCTGCCCGCGTCATAAATGTCACACAGGGCTATCAGAAAATCTATAATATACAGCAAAAAACCAAACACAGAGCTTTTGAAGGTGAACCTGGTAGGTTAGATCCCAGGCGTAGAACAGTTTATCAGCGTCTTGCATTACAATGTACTGCAGGTCATAAATTGTCAGTCAGGGTCCCTACCAAACCACTGTTGGAAAAAAGTGGTAGAAATGCCACCAAATATAAAGTGAGATGGAGAAATCTGCAGCAATG…	ALA	notfound	notfound	GLY	notfound	notfound	notfound	notfound	LEU	notfound	notfound	LEU	notfound	notfound	notfound	3	West Africa	SACE_YCV	Beer
APG	no	> APG_YDL227C_HO chromosome4:46271-48031 - 692 ATGCTTTCTGAAAACACGACTATTCTGATGGCTAACGGTGAAATTAAAGACATCGCAAACGTCACGGCTAACTCTTACGTTATGTGCGCAGATGGCTCCGCTGCCCGCGTCATAAATGTCACACAGGGCTATCAGAAAATCTATAATATACAGCAAAAAACCAAACACAGAGCTTTTGAAGGTGAACCTGGTAGGTTAGATCCCAGGCGTAGAACAGTTTATCAGCGTCTTGCATTACAATGTACTGCAGGTCATAAATTGTCAGTCAGGGTCCCTACCAAACCACTGTTGGAAAAAAGTGGTAGAAATGCCACCAAATATAAAGTGAGATGGAGAAATCTGCAGCAATGTC…	APG_YDL227C_HO chromosome4:46271-48031 - 692ATGCTTTCTGAAAACACGACTATTCTGATGGCTAACGGTGAAATTAAAGACATCGCAAACGTCACGGCTAACTCTTACGTTATGTGCGCAGATGGCTCCGCTGCCCGCGTCATAAATGTCACACAGGGCTATCAGAAAATCTATAATATACAGCAAAAAACCAAACACAGAGCTTTTGAAGGTGAACCTGGTAGGTTAGATCCCAGGCGTAGAACAGTTTATCAGCGTCTTGCATTACAATGTACTGCAGGTCATAAATTGTCAGTCAGGGTCCCTACCAAACCACTGTTGGAAAAAAGTGGTAGAAATGCCACCAAATATAAAGTGAGATGGAGAAATCTGCAGCAATGTCAGA…	ALA	notfound	notfound	GLY	notfound	notfound	notfound	notfound	LEU	notfound	notfound	LEU	notfound	notfound	notfound	3	Araras, Sao Paulo, Brazil	APG	Bioethanol
CMT	no	> CMT_YDL227C_HO chromosome4:46271-48031 - 692 ATGCTTTCTGAAAACACGACTATTCTGATGGCTAACGGTGAAATTAAAGACATCGCAAACGTCACGGCTAACTCTTACGTTATGTGCGCAGATGGCTCCGCTGCCCGCGTCATAAATGTCACACAGGGCTATCAGAAAATCTATAATATACAGCAAAAAACCAAACACAGAGCTTTTGAAGGTGAACCTGGTAGGTTAGATCCCAGGCGTAGAACAGTTTATCAGCGTCTTGCATTACAATGTACTGCAGGTCATAAATTGTCAGTCAGGGTCCCTACCAAACCACTGTTGGAAAAAAGTGGTAGAAATGCCACCAAATATAAAGTGAGATGGAGAAATCTGCAGCAATGTC…	CMT_YDL227C_HO chromosome4:46271-48031 - 692ATGCTTTCTGAAAACACGACTATTCTGATGGCTAACGGTGAAATTAAAGACATCGCAAACGTCACGGCTAACTCTTACGTTATGTGCGCAGATGGCTCCGCTGCCCGCGTCATAAATGTCACACAGGGCTATCAGAAAATCTATAATATACAGCAAAAAACCAAACACAGAGCTTTTGAAGGTGAACCTGGTAGGTTAGATCCCAGGCGTAGAACAGTTTATCAGCGTCTTGCATTACAATGTACTGCAGGTCATAAATTGTCAGTCAGGGTCCCTACCAAACCACTGTTGGAAAAAAGTGGTAGAAATGCCACCAAATATAAAGTGAGATGGAGAAATCTGCAGCAATGTCAGA…	ALA	notfound	notfound	GLY	notfound	notfound	notfound	notfound	LEU	notfound	notfound	LEU	notfound	notfound	notfound	3	Brazil	CMT	Bioethanol
CNC	no	> CNC_YDL227C_HO chromosome4:46271-48031 - 692 ATGCTTTCTGAAAACACGACTATTCTGATGGCTAACGGTGAAATTAAAGACATCGCAAACGTCACGGCTAACTCTTACGTTATGTGCGCAGATGGCTCCGCTGCCCGCGTCATAAATGTCACACAGGGCTATCAGAAAATCTATAATATACAGCAAAAAACCAAACACAGAGCTTTTGAAGGTGAACCTGGTAGGTTAGATCCCAGGCGTAGAACAGTTTATCAGCGTCTTGCATTACAATGTACTGCAGGTCATAAATTGTCAGTCAGGGTCCCTACCAAACCACTGTTGGAAAAAAGTGGTAGAAATGCCACCAAATATAAAGTGAGATGGAGAAATCTGCAGCAATGTC…	CNC_YDL227C_HO chromosome4:46271-48031 - 692ATGCTTTCTGAAAACACGACTATTCTGATGGCTAACGGTGAAATTAAAGACATCGCAAACGTCACGGCTAACTCTTACGTTATGTGCGCAGATGGCTCCGCTGCCCGCGTCATAAATGTCACACAGGGCTATCAGAAAATCTATAATATACAGCAAAAAACCAAACACAGAGCTTTTGAAGGTGAACCTGGTAGGTTAGATCCCAGGCGTAGAACAGTTTATCAGCGTCTTGCATTACAATGTACTGCAGGTCATAAATTGTCAGTCAGGGTCCCTACCAAACCACTGTTGGAAAAAAGTGGTAGAAATGCCACCAAATATAAAGTGAGATGGAGAAATCTGCAGCAATGTCAGA…	ALA	notfound	notfound	GLY	notfound	notfound	notfound	notfound	LEU	notfound	notfound	LEU	notfound	notfound	notfound	3	Brazil	CNC	Bioethanol
CNG	no	> CNG_YDL227C_HO chromosome4:46271-48031 - 692 ATGCTTTCTGAAAACACGACTATTCTGATGGCTAACGGTGAAATTAAAGACATCGCAAACGTCACGGCTAACTCTTACGTTATGTGCGCAGATGGCTCCGCTGCCCGCGTCATAAATGTCACACAGGGCTATCAGAAAATCTATAATATACAGCAAAAAACCAAACACAGAGCTTTTGAAGGTGAACCTGGTAGGTTAGATCCCAGGCGTAGAACAGTTTATCAGCGTCTTGCATTACAATGTACTGCAGGTCATAAATTGTCAGTCAGGGTCCCTACCAAACCACTGTTGGAAAAAAGTGGTAGAAATGCCACCAAATATAAAGTGAGATGGAGAAATCTGCAGCAATGTC…	CNG_YDL227C_HO chromosome4:46271-48031 - 692ATGCTTTCTGAAAACACGACTATTCTGATGGCTAACGGTGAAATTAAAGACATCGCAAACGTCACGGCTAACTCTTACGTTATGTGCGCAGATGGCTCCGCTGCCCGCGTCATAAATGTCACACAGGGCTATCAGAAAATCTATAATATACAGCAAAAAACCAAACACAGAGCTTTTGAAGGTGAACCTGGTAGGTTAGATCCCAGGCGTAGAACAGTTTATCAGCGTCTTGCATTACAATGTACTGCAGGTCATAAATTGTCAGTCAGGGTCCCTACCAAACCACTGTTGGAAAAAAGTGGTAGAAATGCCACCAAATATAAAGTGAGATGGAGAAATCTGCAGCAATGTCAGA…	ALA	notfound	notfound	GLY	notfound	notfound	notfound	notfound	LEU	notfound	notfound	LEU	notfound	notfound	notfound	3	Brazil	CNG	Bioethanol
CNK	no	> CNK_YDL227C_HO chromosome4:46271-48031 - 692 ATGCTTTCTGAAAACACGACTATTCTGATGGCTAACGGTGAAATTAAAGACATCGCAAACGTCACGGCTAACTCTTACGTTATGTGCGCAGATGGCTCCGCTGCCCGCGTCATAAATGTCACACAGGGCTATCAGAAAATCTATAATATACAGCAAAAAACCAAACACAGAGCTTTTGAAGGTGAACCTGGTAGGTTAGATCCCAGGCGTAGAACAGTTTATCAGCGTCTTGCATTACAATGTACTGCAGGTCATAAATTGTCAGTCAGGGTCCCTACCAAACCACTGTTGGAAAAAAGTGGTAGAAATGCCACCAAATATAAAGTGAGATGGAGAAATCTGCAGCAATGTC…	CNK_YDL227C_HO chromosome4:46271-48031 - 692ATGCTTTCTGAAAACACGACTATTCTGATGGCTAACGGTGAAATTAAAGACATCGCAAACGTCACGGCTAACTCTTACGTTATGTGCGCAGATGGCTCCGCTGCCCGCGTCATAAATGTCACACAGGGCTATCAGAAAATCTATAATATACAGCAAAAAACCAAACACAGAGCTTTTGAAGGTGAACCTGGTAGGTTAGATCCCAGGCGTAGAACAGTTTATCAGCGTCTTGCATTACAATGTACTGCAGGTCATAAATTGTCAGTCAGGGTCCCTACCAAACCACTGTTGGAAAAAAGTGGTAGAAATGCCACCAAATATAAAGTGAGATGGAGAAATCTGCAGCAATGTCAGA…	ALA	notfound	notfound	GLY	notfound	notfound	notfound	notfound	LEU	notfound	notfound	LEU	notfound	notfound	notfound	3	Brazil	CNK	Bioethanol
CNP	no	> CNP_YDL227C_HO chromosome4:46271-48031 - 692 ATGCTTTCTGAAAACACGACTATTCTGATGGCTAACGGTGAAATTAAAGACATCGCAAACGTCACGGCTAACTCTTACGTTATGTGCGCAGATGGCTCCGCTGCCCGCGTCATAAATGTCACACAGGGCTATCAGAAAATCTATAATATACAGCAAAAAACCAAACACAGAGCTTTTGAAGGTGAACCTGGTAGGTTAGATCCCAGGCGTAGAACAGTTTATCAGCGTCTTGCATTACAATGTACTGCAGGTCATAAATTGTCAGTCAGGGTCCCTACCAAACCACTGTTGGAAAAAAGTGGTAGAAATGCCACCAAATATAAAGTGAGATGGAGAAATCTGCAGCAATGTC…	CNP_YDL227C_HO chromosome4:46271-48031 - 692ATGCTTTCTGAAAACACGACTATTCTGATGGCTAACGGTGAAATTAAAGACATCGCAAACGTCACGGCTAACTCTTACGTTATGTGCGCAGATGGCTCCGCTGCCCGCGTCATAAATGTCACACAGGGCTATCAGAAAATCTATAATATACAGCAAAAAACCAAACACAGAGCTTTTGAAGGTGAACCTGGTAGGTTAGATCCCAGGCGTAGAACAGTTTATCAGCGTCTTGCATTACAATGTACTGCAGGTCATAAATTGTCAGTCAGGGTCCCTACCAAACCACTGTTGGAAAAAAGTGGTAGAAATGCCACCAAATATAAAGTGAGATGGAGAAATCTGCAGCAATGTCAGA…	ALA	notfound	notfound	GLY	notfound	notfound	notfound	notfound	LEU	notfound	notfound	LEU	notfound	notfound	notfound	3	Brazil	CNP	Bioethanol
CNQ	no	> CNQ_YDL227C_HO chromosome4:46271-48031 - 692 ATGCTTTCTGAAAACACGACTATTCTGATGGCTAACGGTGAAATTAAAGACATCGCAAACGTCACGGCTAACTCTTACGTTATGTGCGCAGATGGCTCCGCTGCCCGCGTCATAAATGTCACACAGGGCTATCAGAAAATCTATAATATACAGCAAAAAACCAAACACAGAGCTTTTGAAGGTGAACCTGGTAGGTTAGATCCCAGGCGTAGAACAGTTTATCAGCGTCTTGCATTACAATGTACTGCAGGTCATAAATTGTCAGTCAGGGTCCCTACCAAACCACTGTTGGAAAAAAGTGGTAGAAATGCCACCAAATATAAAGTGAGATGGAGAAATCTGCAGCAATGTC…	CNQ_YDL227C_HO chromosome4:46271-48031 - 692ATGCTTTCTGAAAACACGACTATTCTGATGGCTAACGGTGAAATTAAAGACATCGCAAACGTCACGGCTAACTCTTACGTTATGTGCGCAGATGGCTCCGCTGCCCGCGTCATAAATGTCACACAGGGCTATCAGAAAATCTATAATATACAGCAAAAAACCAAACACAGAGCTTTTGAAGGTGAACCTGGTAGGTTAGATCCCAGGCGTAGAACAGTTTATCAGCGTCTTGCATTACAATGTACTGCAGGTCATAAATTGTCAGTCAGGGTCCCTACCAAACCACTGTTGGAAAAAAGTGGTAGAAATGCCACCAAATATAAAGTGAGATGGAGAAATCTGCAGCAATGTCAGA…	ALA	notfound	notfound	GLY	notfound	notfound	notfound	notfound	LEU	notfound	notfound	LEU	notfound	notfound	notfound	3	Brazil	CNQ	Bioethanol
ARR	no	> ARR_YDL227C_HO chromosome4:46271-48031 - 692 ATGCTTTCTGAAAACACGACTATTCTGATGGCTAACGGTGAAATTAAAGACATCGCAAACGTCACGGCTAACTCTTACGTTATGTGCGCAGATGGCTCCGCTGCCCGCGTCATAAATGTCACACAGGGCTATCAGAAAATCTATAATATACAGCAAAAAACCAAACACAGAGCTTTTGAAGGTGAACCTGGTAGGTTAGATCCCAGGCGTAGAACAGTTTATCAGCGTCTTGCATTACAATGTACTGCAGGTCATAAATTGTCAGTCAGGGTCCCTACCAAACCACTGTTGGAAAAAAGTGGTAGAAATGCCACCAAATATAAAGTGAGATGGAGAAATCTGCAGCAATGTC…	ARR_YDL227C_HO chromosome4:46271-48031 - 692ATGCTTTCTGAAAACACGACTATTCTGATGGCTAACGGTGAAATTAAAGACATCGCAAACGTCACGGCTAACTCTTACGTTATGTGCGCAGATGGCTCCGCTGCCCGCGTCATAAATGTCACACAGGGCTATCAGAAAATCTATAATATACAGCAAAAAACCAAACACAGAGCTTTTGAAGGTGAACCTGGTAGGTTAGATCCCAGGCGTAGAACAGTTTATCAGCGTCTTGCATTACAATGTACTGCAGGTCATAAATTGTCAGTCAGGGTCCCTACCAAACCACTGTTGGAAAAAAGTGGTAGAAATGCCACCAAATATAAAGTGAGATGGAGAAATCTGCAGCAATGTCAGA…	ALA	notfound	notfound	GLY	notfound	notfound	notfound	notfound	LEU	notfound	notfound	LEU	notfound	notfound	notfound	3	Delft, Netherlands	ARR	Dairy
ASN	no	> ASN_YDL227C_HO chromosome4:46271-48031 - 692 ATGCTTTCTGAAAACACGACTATTCTGATGGCTAACGGTGAAATTAAAGACATCGCAAACGTCACGGCTAACTCTTACGTTATGTGCGCAGATGGCTCCGCTGCCCGCGTCATAAATGTCACACAGGGCTATCAGAAAATCTATAATATACAGCAAAAAACCAAACACAGAGCTTTTGAAGGTGAACCTGGTAGGTTAGATCCCAGGCGTAGAACAGTTTATCAGCGTCTTGCATTACAATGTACTGCAGGTCATAAATTGTCAGTCAGGGTCCCTACCAAACCACTGTTGGAAAAAAGTGGTAGAAATGCCACCAAATATAAAGTGAGATGGAGAAATCTGCAGCAATGTC…	ASN_YDL227C_HO chromosome4:46271-48031 - 692ATGCTTTCTGAAAACACGACTATTCTGATGGCTAACGGTGAAATTAAAGACATCGCAAACGTCACGGCTAACTCTTACGTTATGTGCGCAGATGGCTCCGCTGCCCGCGTCATAAATGTCACACAGGGCTATCAGAAAATCTATAATATACAGCAAAAAACCAAACACAGAGCTTTTGAAGGTGAACCTGGTAGGTTAGATCCCAGGCGTAGAACAGTTTATCAGCGTCTTGCATTACAATGTACTGCAGGTCATAAATTGTCAGTCAGGGTCCCTACCAAACCACTGTTGGAAAAAAGTGGTAGAAATGCCACCAAATATAAAGTGAGATGGAGAAATCTGCAGCAATGTCAGA…	ALA	notfound	notfound	GLY	notfound	notfound	notfound	notfound	LEU	notfound	notfound	LEU	notfound	notfound	notfound	3	Normandy, France	ASN	Dairy
BFS	no	> BFS_YDL227C_HO chromosome4:46271-48031 - 692 ATGCTTTCTGAAAACACGACTATTCTGATGGCTAACGGTGAAATTAAAGACATCGCAAACGTCACGGCTAACTCTTACGTTATGTGCGCAGATGGCTCCGCTGCCCGCGTCATAAATGTCACACAGGGCTATCAGAAAATCTATAATATACAGCAAAAAACCAAACACAGAGCTTTTGAAGGTGAACCTGGTAGGTTAGATCCCAGGCGTAGAACAGTTTATCAGCGTCTTGCATTACAATGTACTGCAGGTCATAAATTGTCAGTCAGGGTCCCTACCAAACCACTGTTGGAAAAAAGTGGTAGAAATGCCACCAAATATAAAGTGAGATGGAGAAATCTGCAGCAATGTC…	BFS_YDL227C_HO chromosome4:46271-48031 - 692ATGCTTTCTGAAAACACGACTATTCTGATGGCTAACGGTGAAATTAAAGACATCGCAAACGTCACGGCTAACTCTTACGTTATGTGCGCAGATGGCTCCGCTGCCCGCGTCATAAATGTCACACAGGGCTATCAGAAAATCTATAATATACAGCAAAAAACCAAACACAGAGCTTTTGAAGGTGAACCTGGTAGGTTAGATCCCAGGCGTAGAACAGTTTATCAGCGTCTTGCATTACAATGTACTGCAGGTCATAAATTGTCAGTCAGGGTCCCTACCAAACCACTGTTGGAAAAAAGTGGTAGAAATGCCACCAAATATAAAGTGAGATGGAGAAATCTGCAGCAATGTCAGA…	ALA	notfound	notfound	GLY	notfound	notfound	notfound	notfound	LEU	notfound	notfound	LEU	notfound	notfound	notfound	3	Normandy, France	BFS	Dairy
BFT	no	> BFT_YDL227C_HO chromosome4:46271-48031 - 692 ATGCTTTCTGAAAACACGACTATTCTGATGGCTAACGGTGAAATTAAAGACATCGCAAACGTCACGGCTAACTCTTACGTTATGTGCGCAGATRGCTCCGCTGCCCGCGTCATAAATGTCACACAGGGCTATCAGAAAATCTATAATATACAGCAAAAAACCAAACACAGAGCTTTTGAAGGTGAACCTGGTAGGTTAGATCCCAGGCGTAGAACAGTTTATCAGCGTCTTGCATTACAATGTACTGCAGGTCATAAATTGTCAGTCAGGGTCCCTACCAAACCACTGTTGGAAAAAAGTGGTAGAAATGCCACCAAATATAAAGTGAGATGGAGAAATCTGCAGCAATGTC…	BFT_YDL227C_HO chromosome4:46271-48031 - 692ATGCTTTCTGAAAACACGACTATTCTGATGGCTAACGGTGAAATTAAAGACATCGCAAACGTCACGGCTAACTCTTACGTTATGTGCGCAGATRGCTCCGCTGCCCGCGTCATAAATGTCACACAGGGCTATCAGAAAATCTATAATATACAGCAAAAAACCAAACACAGAGCTTTTGAAGGTGAACCTGGTAGGTTAGATCCCAGGCGTAGAACAGTTTATCAGCGTCTTGCATTACAATGTACTGCAGGTCATAAATTGTCAGTCAGGGTCCCTACCAAACCACTGTTGGAAAAAAGTGGTAGAAATGCCACCAAATATAAAGTGAGATGGAGAAATCTGCAGCAATGTCAGA…	ALA	notfound	notfound	GLY	notfound	notfound	notfound	notfound	LEU	notfound	notfound	LEU	notfound	notfound	notfound	3	Normandy, France	BFT	Dairy
BFV	no	> BFV_YDL227C_HO chromosome4:46271-48031 - 692 ATGCTTTCTGAAAACACGACTATTCTGATGGCTAACGGTGAAATTAAAGACATCGCAAACGTCACGGCTAACTCTTACGTTATGTGCGCAGATGGCTCCGCTGCCCGCGTCATAAATGTCACACAGGGCTATCAGAAAATCTATAATATACAGCAAAAAACCAAACACAGAGCTTTTGAAGGTGAACCTGGTAGGTTAGATCCCAGGCGTAGAACAGTTTATCAGCGTCTTGCATTACAATGTACTGCAGGTCATAAATTGTCAGTCAGGGTCCCTACCAAACCACTGTTGGMAAAAAGTGGTAGAAATGCCACCAAATATAAAGTGAGATGGAGAAATCTGCAGCAATGTC…	BFV_YDL227C_HO chromosome4:46271-48031 - 692ATGCTTTCTGAAAACACGACTATTCTGATGGCTAACGGTGAAATTAAAGACATCGCAAACGTCACGGCTAACTCTTACGTTATGTGCGCAGATGGCTCCGCTGCCCGCGTCATAAATGTCACACAGGGCTATCAGAAAATCTATAATATACAGCAAAAAACCAAACACAGAGCTTTTGAAGGTGAACCTGGTAGGTTAGATCCCAGGCGTAGAACAGTTTATCAGCGTCTTGCATTACAATGTACTGCAGGTCATAAATTGTCAGTCAGGGTCCCTACCAAACCACTGTTGGMAAAAAGTGGTAGAAATGCCACCAAATATAAAGTGAGATGGAGAAATCTGCAGCAATGTCAGA…	ALA	notfound	notfound	GLY	notfound	notfound	notfound	notfound	LEU	notfound	notfound	LEU	notfound	notfound	notfound	3	Normandy, France	BFV	Dairy
BGA	no	> BGA_YDL227C_HO chromosome4:46271-48031 - 692 ATGCTTTCTGAAAACACGACTATTCTGATGGCTAACGGTGAAATTAAAGACATCGCAAACGTCACGGCTAACTCTTACGTTATGTGCGCAGATGGCTCCGCTGCCCGCGTCATAAATGTCACACAGGGCTATCAGAAAATCTATAATATACAGCAAAAAACCAAACACAGAGCTTTTGAAGGTGAACCTGGTAGGTTAGATCCCAGGCGTAGAACAGTTTATCAGCGTCTTGCATTACAATGTACTGCAGGTCATAAATTGTCAGTCAGGGTCCCTACCAAACCACTGTTGGMAAAAAGTGGTAGAAATGCCACCAAATATAAAGTGAGATGGAGAAATCTGCAGCAATGTC…	BGA_YDL227C_HO chromosome4:46271-48031 - 692ATGCTTTCTGAAAACACGACTATTCTGATGGCTAACGGTGAAATTAAAGACATCGCAAACGTCACGGCTAACTCTTACGTTATGTGCGCAGATGGCTCCGCTGCCCGCGTCATAAATGTCACACAGGGCTATCAGAAAATCTATAATATACAGCAAAAAACCAAACACAGAGCTTTTGAAGGTGAACCTGGTAGGTTAGATCCCAGGCGTAGAACAGTTTATCAGCGTCTTGCATTACAATGTACTGCAGGTCATAAATTGTCAGTCAGGGTCCCTACCAAACCACTGTTGGMAAAAAGTGGTAGAAATGCCACCAAATATAAAGTGAGATGGAGAAATCTGCAGCAATGTCAGA…	ALA	notfound	notfound	GLY	notfound	notfound	notfound	notfound	LEU	notfound	notfound	LEU	notfound	notfound	notfound	3	Normandy, France	BGA	Dairy
BGB	no	> BGB_YDL227C_HO chromosome4:46271-48031 - 692 ATGCTTTCTGAAAACACGACTATTCTGATGGCTAACGGTGAAATTAAAGACATCGCAAACGTCACGGCTAACTCTTACGTTATGTGCGCAGATGGCTCCGCTGCCCGCGTCATAAATGTCACACAGGGCTATCAGAAAATCTATAATATACAGCAAAAAACCAAACACAGAGCTTTTGAAGGTGAACCTGGTAGGTTAGATCCCAGGCGTAGARCAGTTTATCAGCGTCTTGCATTACAATGTACTGCAGGTCATAAATTGTCAGTCAGGGTCCCTACCAAACCACTGTTGGAAAAAAGTGGTAGAAATGCCACCAAATATAAAGTGAGATGGAGAAATCTGCAGCAATGTC…	BGB_YDL227C_HO chromosome4:46271-48031 - 692ATGCTTTCTGAAAACACGACTATTCTGATGGCTAACGGTGAAATTAAAGACATCGCAAACGTCACGGCTAACTCTTACGTTATGTGCGCAGATGGCTCCGCTGCCCGCGTCATAAATGTCACACAGGGCTATCAGAAAATCTATAATATACAGCAAAAAACCAAACACAGAGCTTTTGAAGGTGAACCTGGTAGGTTAGATCCCAGGCGTAGARCAGTTTATCAGCGTCTTGCATTACAATGTACTGCAGGTCATAAATTGTCAGTCAGGGTCCCTACCAAACCACTGTTGGAAAAAAGTGGTAGAAATGCCACCAAATATAAAGTGAGATGGAGAAATCTGCAGCAATGTCAGA…	ALA	notfound	notfound	GLY	notfound	notfound	notfound	notfound	LEU	notfound	notfound	LEU	notfound	notfound	notfound	3	Normandy, France	BGB	Dairy
BGC	no	> BGC_YDL227C_HO chromosome4:46271-48031 - 692 ATGCTTTCTGAAAACACGACTATTCTGATGGCTAACGGTGAAATTAAAGACATCGCAAACGTCACGGCTAACTCTTACGTTATGTGCGCAGATGGCTCCGCTGCCCGCGTCATAAATGTCACACAGGGCTATCAGAAAATCTATAATATACAGCAAAAAACCAAACACAGAGCTTTTGAAGGTGAACCTGGTAGGTTAGATCCCAGGCGTAGAACAGTTTATCAGCGTCTTGCATTACAATGTACTGCAGGTCATAAATTGTCAGTCAGGGTCCCTACCAAACCACTGTTGGMAAAAAGTGGTAGAAATGCCACCAAATATAAAGTGAGATGGAGAAATCTGCAGCAATGTC…	BGC_YDL227C_HO chromosome4:46271-48031 - 692ATGCTTTCTGAAAACACGACTATTCTGATGGCTAACGGTGAAATTAAAGACATCGCAAACGTCACGGCTAACTCTTACGTTATGTGCGCAGATGGCTCCGCTGCCCGCGTCATAAATGTCACACAGGGCTATCAGAAAATCTATAATATACAGCAAAAAACCAAACACAGAGCTTTTGAAGGTGAACCTGGTAGGTTAGATCCCAGGCGTAGAACAGTTTATCAGCGTCTTGCATTACAATGTACTGCAGGTCATAAATTGTCAGTCAGGGTCCCTACCAAACCACTGTTGGMAAAAAGTGGTAGAAATGCCACCAAATATAAAGTGAGATGGAGAAATCTGCAGCAATGTCAGA…	ALA	notfound	notfound	GLY	notfound	notfound	notfound	notfound	LEU	notfound	notfound	LEU	notfound	notfound	notfound	3	Normandy, France	BGC	Dairy
BGD	no	> BGD_YDL227C_HO chromosome4:46271-48031 - 692 ATGCTTTCTGAAAACACGACTATTCTGATGGCTAACGGTGAAATTAAAGACATCGCAAACGTCACGGCTAACTCTTACGTTATGTGCGCAGATGGCTCCGCTGCCCGCGTCATAAATGTCACACAGGGCTATCAGAAAATCTATAATATACAGCAAAAAACCAAACACAGAGCTTTTGAAGGTGAACCTGGTAGGTTAGATCCCAGGCGTAGAACAGTTTATCAGCGTCTTGCATTACAATGTACTGCAGGTCATAAATTGTCAGTCAGGGTCCCTACCAAACCACTGTTGGAAAAAAGTGGTAGAAATGCCACCAAATATAAAGTGAGATGGAGAAATCTGCAGCAATGTC…	BGD_YDL227C_HO chromosome4:46271-48031 - 692ATGCTTTCTGAAAACACGACTATTCTGATGGCTAACGGTGAAATTAAAGACATCGCAAACGTCACGGCTAACTCTTACGTTATGTGCGCAGATGGCTCCGCTGCCCGCGTCATAAATGTCACACAGGGCTATCAGAAAATCTATAATATACAGCAAAAAACCAAACACAGAGCTTTTGAAGGTGAACCTGGTAGGTTAGATCCCAGGCGTAGAACAGTTTATCAGCGTCTTGCATTACAATGTACTGCAGGTCATAAATTGTCAGTCAGGGTCCCTACCAAACCACTGTTGGAAAAAAGTGGTAGAAATGCCACCAAATATAAAGTGAGATGGAGAAATCTGCAGCAATGTCAGA…	ALA	notfound	notfound	GLY	notfound	notfound	notfound	notfound	LEU	notfound	notfound	LEU	notfound	notfound	notfound	3	Normandy, France	BGD	Dairy
BGE	no	> BGE_YDL227C_HO chromosome4:46271-48031 - 692 ATGCTTTCTGAAAACACGACTATTCTGATGGCTAACGGTGAAATTAAAGACATCGCAAACGTCACGGCTAACTCTTACGTTATGTGCGCAGATRGCTCCGCTGCCCGCGTCATAAATGTCACACAGGGCTATCAGAAAATCTATAATATACAGCAAAAAACCAAACACAGAGCTTTTGAAGGTGAACCTGGTAGGTTAGATCCCAGGCGTAGAACAGTTTATCAGCGTCTTGCATTACAATGTACTGCAGGTCATAAATTGTCAGTCAGGGTCCCTACCAAACCACTGTTGGAAAAAAGTGGTAGAAATGCCACCAAATATAAAGTGAGATGGAGAAATCTGCAGCAATGTC…	BGE_YDL227C_HO chromosome4:46271-48031 - 692ATGCTTTCTGAAAACACGACTATTCTGATGGCTAACGGTGAAATTAAAGACATCGCAAACGTCACGGCTAACTCTTACGTTATGTGCGCAGATRGCTCCGCTGCCCGCGTCATAAATGTCACACAGGGCTATCAGAAAATCTATAATATACAGCAAAAAACCAAACACAGAGCTTTTGAAGGTGAACCTGGTAGGTTAGATCCCAGGCGTAGAACAGTTTATCAGCGTCTTGCATTACAATGTACTGCAGGTCATAAATTGTCAGTCAGGGTCCCTACCAAACCACTGTTGGAAAAAAGTGGTAGAAATGCCACCAAATATAAAGTGAGATGGAGAAATCTGCAGCAATGTCAGA…	ALA	notfound	notfound	GLY	notfound	notfound	notfound	notfound	LEU	notfound	notfound	LEU	notfound	notfound	notfound	3	Normandy, France	BGE	Dairy
BGF	no	> BGF_YDL227C_HO chromosome4:46271-48031 - 692 ATGCTTTCTGAAAACACGACTATTCTGATGGCTAACGGTGAAATTAAAGACATCGCAAACGTCACGGCTAACTCTTACGTTATGTGCGCAGATGGCTCCGCTGCCCGCGTCATAAATGTCACACAGGGCTATCAGAAAATCTATAATATACAGCAAAAAACCAAACACAGAGCTTTTGAAGGTGAACCTGGTAGGTTAGATCCCAGGCGTAGAACAGTTTATCAGCGTCTTGCATTACAATGTACTGCAGGTCATAAATTGTCAGTCAGGGTCCCTACCAAACCACTGTTGGMAAAAAGTGGTAGAAATGCCACCAAATATAAAGTGAGATGGAGAAATCTGCAGCAATGTC…	BGF_YDL227C_HO chromosome4:46271-48031 - 692ATGCTTTCTGAAAACACGACTATTCTGATGGCTAACGGTGAAATTAAAGACATCGCAAACGTCACGGCTAACTCTTACGTTATGTGCGCAGATGGCTCCGCTGCCCGCGTCATAAATGTCACACAGGGCTATCAGAAAATCTATAATATACAGCAAAAAACCAAACACAGAGCTTTTGAAGGTGAACCTGGTAGGTTAGATCCCAGGCGTAGAACAGTTTATCAGCGTCTTGCATTACAATGTACTGCAGGTCATAAATTGTCAGTCAGGGTCCCTACCAAACCACTGTTGGMAAAAAGTGGTAGAAATGCCACCAAATATAAAGTGAGATGGAGAAATCTGCAGCAATGTCAGA…	ALA	notfound	notfound	GLY	notfound	notfound	notfound	notfound	LEU	notfound	notfound	LEU	notfound	notfound	notfound	3	France	BGF	Dairy
BGG	no	> BGG_YDL227C_HO chromosome4:46271-48031 - 692 ATGCTTTCTGAAAACACGACTATTCTGATGGCTAACGGTGAAATTAAAGACATCGCAAACGTCACGGCTAACTCTTACGTTATGTGCGCAGATGGCTCCGCTGCCCGCGTCATAAATGTCACACAGGGCTATCAGAAAATCTATAATATACAGCAAAAAACCAAACACAGAGCTTTTGAAGGTGAACCTGGTAGGTTAGATCCCAGGCGTAGAACAGTTTATCAGCGTCTTGCATTACAATGTACTGCAGGTCATAAATTGTCAGTCAGGGTCCCTACCAAACCACTGTTGGMAAAAAGTGGTAGAAATGCCACCAAATATAAAGTGAGATGGAGAAATCTGCAGCAATGTC…	BGG_YDL227C_HO chromosome4:46271-48031 - 692ATGCTTTCTGAAAACACGACTATTCTGATGGCTAACGGTGAAATTAAAGACATCGCAAACGTCACGGCTAACTCTTACGTTATGTGCGCAGATGGCTCCGCTGCCCGCGTCATAAATGTCACACAGGGCTATCAGAAAATCTATAATATACAGCAAAAAACCAAACACAGAGCTTTTGAAGGTGAACCTGGTAGGTTAGATCCCAGGCGTAGAACAGTTTATCAGCGTCTTGCATTACAATGTACTGCAGGTCATAAATTGTCAGTCAGGGTCCCTACCAAACCACTGTTGGMAAAAAGTGGTAGAAATGCCACCAAATATAAAGTGAGATGGAGAAATCTGCAGCAATGTCAGA…	ALA	notfound	notfound	GLY	notfound	notfound	notfound	notfound	LEU	notfound	notfound	LEU	notfound	notfound	notfound	3	France	BGG	Dairy
BGH	no	> BGH_YDL227C_HO chromosome4:46271-48031 - 692 ATGCTTTCTGAAAACACGACTATTCTGATGGCTAACGGTGAAATTAAAGACATCGCAAACGTCACGGCTAACTCTTACGTTATGTGCGCAGATGGCTCCGCTGCCCGCGTCATAAATGTCACACAGGGCTATCAGAAAATCTATAATATACAGCAAAAAACCAAACACAGAGCTTTTGAAGGTGAACCTGGTAGGTTAGATCCCAGGCGTAGAACAGTTTATCAGCGTCTTGCATTACAATGTACTGCAGGTCATAAATTGTCAGTCAGGGTCCCTACCAAACCACTGTTGGAAAAAAGTGGTAGAAATGCCACCAAATATAAAGTGAGATGGAGAAATCTGCAGCAATGTC…	BGH_YDL227C_HO chromosome4:46271-48031 - 692ATGCTTTCTGAAAACACGACTATTCTGATGGCTAACGGTGAAATTAAAGACATCGCAAACGTCACGGCTAACTCTTACGTTATGTGCGCAGATGGCTCCGCTGCCCGCGTCATAAATGTCACACAGGGCTATCAGAAAATCTATAATATACAGCAAAAAACCAAACACAGAGCTTTTGAAGGTGAACCTGGTAGGTTAGATCCCAGGCGTAGAACAGTTTATCAGCGTCTTGCATTACAATGTACTGCAGGTCATAAATTGTCAGTCAGGGTCCCTACCAAACCACTGTTGGAAAAAAGTGGTAGAAATGCCACCAAATATAAAGTGAGATGGAGAAATCTGCAGCAATGTCAGA…	ALA	notfound	notfound	GLY	notfound	notfound	notfound	notfound	LEU	notfound	notfound	LEU	notfound	notfound	notfound	3	Poitou-Charentes, France	BGH	Dairy
BGI	no	> BGI_YDL227C_HO chromosome4:46271-48031 - 692 ATGCTTTCTGAAAACACGACTATTCTGATGGCTAACGGTGAAATTAAAGACATCGCAAACGTCACGGCTAACTCTTACGTTATGTGCGCAGATGGCTCCGCTGCCCGCGTCATAAATGTCACACAGGGCTATCAGAAAATCTATAATATACAGCAAAAAACCAAACACAGAGCTTTTGAAGGTGAACCTGGTAGGTTAGATCCCAGGCGTAGAACAGTTTATCAGCGTCTTGCATTACAATGTACTGCAGGTCATAAATTGTCAGTCAGGGTCCCTACCAAACCACTGTTGGAAAAAAGTGGTAGAAATGCCACCAAATATAAAGTGAGATGGAGAAATCTGCAGCAATGTC…	BGI_YDL227C_HO chromosome4:46271-48031 - 692ATGCTTTCTGAAAACACGACTATTCTGATGGCTAACGGTGAAATTAAAGACATCGCAAACGTCACGGCTAACTCTTACGTTATGTGCGCAGATGGCTCCGCTGCCCGCGTCATAAATGTCACACAGGGCTATCAGAAAATCTATAATATACAGCAAAAAACCAAACACAGAGCTTTTGAAGGTGAACCTGGTAGGTTAGATCCCAGGCGTAGAACAGTTTATCAGCGTCTTGCATTACAATGTACTGCAGGTCATAAATTGTCAGTCAGGGTCCCTACCAAACCACTGTTGGAAAAAAGTGGTAGAAATGCCACCAAATATAAAGTGAGATGGAGAAATCTGCAGCAATGTCAGA…	ALA	notfound	notfound	GLY	notfound	notfound	notfound	notfound	LEU	notfound	notfound	LEU	notfound	notfound	notfound	3	Normandy, France	BGI	Dairy
BGK	no	> BGK_YDL227C_HO chromosome4:46271-48031 - 692 ATGCTTTCTGAAAACACGACTATTCTGATGGCTAACGGTGAAATTAAAGACATCGCAAACGTCACGGCTAACTCTTACGTTATGTGCGCAGATGGCTCCGCTGCCCGCGTCATAAATGTCACACAGGGCTATCAGAAAATCTATAATATACAGCAAAAAACCAAACACAGAGCTTTTGAAGGTGAACCTGGTAGGTTAGATCCCAGGCGTAGAACAGTTTATCAGCGTCTTGCATTACAATGTACTGCAGGTCATAAATTGTCAGTCAGGGTCCCTACCAAACCACTGTTGGAAAAAAGTGGTAGAAATGCCACCAAATATAAAGTGAGATGGAGAAATCTGCAGCAATGTC…	BGK_YDL227C_HO chromosome4:46271-48031 - 692ATGCTTTCTGAAAACACGACTATTCTGATGGCTAACGGTGAAATTAAAGACATCGCAAACGTCACGGCTAACTCTTACGTTATGTGCGCAGATGGCTCCGCTGCCCGCGTCATAAATGTCACACAGGGCTATCAGAAAATCTATAATATACAGCAAAAAACCAAACACAGAGCTTTTGAAGGTGAACCTGGTAGGTTAGATCCCAGGCGTAGAACAGTTTATCAGCGTCTTGCATTACAATGTACTGCAGGTCATAAATTGTCAGTCAGGGTCCCTACCAAACCACTGTTGGAAAAAAGTGGTAGAAATGCCACCAAATATAAAGTGAGATGGAGAAATCTGCAGCAATGTCAGA…	ALA	notfound	notfound	GLY	notfound	notfound	notfound	notfound	LEU	notfound	notfound	LEU	notfound	notfound	notfound	3	Normandy, France	BGK	Dairy
BGL	no	> BGL_YDL227C_HO chromosome4:46271-48031 - 692 ATGCTTTCTGAAAACACGACTATTCTGATGGCTAACGGTGAAATTAAAGACATCGCAAACGTCACGGCTAACTCTTACGTTATGTGCGCAGATGGCTCCGCTGCCCGCGTCATAAATGTCACACAGGGCTATCAGAAAATCTATAATATACAGCAAAAAACCAAACACAGAGCTTTTGAAGGTGAACCTGGTAGGTTAGATCCCAGGCGTAGAACAGTTTATCAGCGTCTTGCATTACAATGTACTGCAGGTCATAAATTGTCAGTCAGGGTCCCTACCAAACCACTGTTGGMAAAAAGTGGTAGAAATGCCACCAAATATAAAGTGAGATGGAGAAATCTGCAGCAATGTC…	BGL_YDL227C_HO chromosome4:46271-48031 - 692ATGCTTTCTGAAAACACGACTATTCTGATGGCTAACGGTGAAATTAAAGACATCGCAAACGTCACGGCTAACTCTTACGTTATGTGCGCAGATGGCTCCGCTGCCCGCGTCATAAATGTCACACAGGGCTATCAGAAAATCTATAATATACAGCAAAAAACCAAACACAGAGCTTTTGAAGGTGAACCTGGTAGGTTAGATCCCAGGCGTAGAACAGTTTATCAGCGTCTTGCATTACAATGTACTGCAGGTCATAAATTGTCAGTCAGGGTCCCTACCAAACCACTGTTGGMAAAAAGTGGTAGAAATGCCACCAAATATAAAGTGAGATGGAGAAATCTGCAGCAATGTCAGA…	ALA	notfound	notfound	GLY	notfound	notfound	notfound	notfound	LEU	notfound	notfound	LEU	notfound	notfound	notfound	3	Normandy, France	BGL	Dairy
BGM	no	> BGM_YDL227C_HO chromosome4:46271-48031 - 692 ATGCTTTCTGAAAACACGACTATTCTGATGGCTAACGGTGAAATTAAAGACATCGCAAACGTCACGGCTAACTCTTACGTTATGTGCGCAGATGGCTCCGCTGCCCGCGTCATAAATGTCACACAGGGCTATCAGAAAATCTATAATATACAGCAAAAAACCAAACACAGAGCTTTTGAAGGTGAACCTGGTAGGTTAGATCCCAGGCGTAGAACRGTTTATCAGCGTCTTGCATTACAATGTACTGCAGGTCATAAATTGTCAGTCAGGGTCCCTACCAAACCACTGTTGGMAAAAARTGGTAGAAATGCCACCAAATATAAAGTGAGATGGAGAAATCTGCAGCAATGTC…	BGM_YDL227C_HO chromosome4:46271-48031 - 692ATGCTTTCTGAAAACACGACTATTCTGATGGCTAACGGTGAAATTAAAGACATCGCAAACGTCACGGCTAACTCTTACGTTATGTGCGCAGATGGCTCCGCTGCCCGCGTCATAAATGTCACACAGGGCTATCAGAAAATCTATAATATACAGCAAAAAACCAAACACAGAGCTTTTGAAGGTGAACCTGGTAGGTTAGATCCCAGGCGTAGAACRGTTTATCAGCGTCTTGCATTACAATGTACTGCAGGTCATAAATTGTCAGTCAGGGTCCCTACCAAACCACTGTTGGMAAAAARTGGTAGAAATGCCACCAAATATAAAGTGAGATGGAGAAATCTGCAGCAATGTCAGA…	ALA	notfound	notfound	GLY	notfound	notfound	notfound	notfound	LEU	notfound	notfound	LEU	notfound	notfound	notfound	3	Normandy, France	BGM	Dairy
BGN	no	> BGN_YDL227C_HO chromosome4:46271-48031 - 692 ATGCTTTCTGAAAACACGACTATTCTGATGGCTAACGGTGAAATTAAAGACATCGCAAACGTCACGGCTAACTCTTACGTTATGTGCGCAGATGGCTCCGCTGCCCGCGTCATAAATGTCACACAGGGCTATCAGAAAATCTATAATATACAGCAAAAAACCAAACACAGAGCTTTTGAAGGTGAACCTGGTAGGTTAGATCCCAGGCGTAGAACAGTTTATCAGCGTCTTGCATTACAATGTACTGCAGGTCATAAATTGTCAGTCAGGGTCCCTACCAAACCACTGTTGGAAAAAAGTGGTAGAAATGCCACCAAATATAAAGTGAGATGGAGAAATCTGCAGCAATGTC…	BGN_YDL227C_HO chromosome4:46271-48031 - 692ATGCTTTCTGAAAACACGACTATTCTGATGGCTAACGGTGAAATTAAAGACATCGCAAACGTCACGGCTAACTCTTACGTTATGTGCGCAGATGGCTCCGCTGCCCGCGTCATAAATGTCACACAGGGCTATCAGAAAATCTATAATATACAGCAAAAAACCAAACACAGAGCTTTTGAAGGTGAACCTGGTAGGTTAGATCCCAGGCGTAGAACAGTTTATCAGCGTCTTGCATTACAATGTACTGCAGGTCATAAATTGTCAGTCAGGGTCCCTACCAAACCACTGTTGGAAAAAAGTGGTAGAAATGCCACCAAATATAAAGTGAGATGGAGAAATCTGCAGCAATGTCAGA…	ALA	notfound	notfound	GLY	notfound	notfound	notfound	notfound	LEU	notfound	notfound	LEU	notfound	notfound	notfound	3	Normandy, France	BGN	Dairy
BGP	no	> BGP_YDL227C_HO chromosome4:46271-48031 - 692 ATGCTTTCTGAAAACACGACTATTCTGATGGCTAACGGTGAAATTAAAGACATCGCAAACGTCACGGCTAACTCTTACGTTATGTGCGCAGATGGCTCCGCTGCCCGCGTCATAAATGTCACACAGGGCTATCAGAAAATCTATAATATACAGCAAAAAACCAAACACAGAGCTTTTGAAGGTGAACCTGGTAGGTTAGATCCCAGGCGTAGAACGGTTTATCAGCGTCTTGCATTACAATGTACTGCAGGTCATAAATTGTCAGTCAGGGTCCCTACCAAACCACTGTTGGCAAAAAGTGGTAGAAATGCCACCAAATATAAAGTGAGATGGAGAAATCTGCAGCAATGTC…	BGP_YDL227C_HO chromosome4:46271-48031 - 692ATGCTTTCTGAAAACACGACTATTCTGATGGCTAACGGTGAAATTAAAGACATCGCAAACGTCACGGCTAACTCTTACGTTATGTGCGCAGATGGCTCCGCTGCCCGCGTCATAAATGTCACACAGGGCTATCAGAAAATCTATAATATACAGCAAAAAACCAAACACAGAGCTTTTGAAGGTGAACCTGGTAGGTTAGATCCCAGGCGTAGAACGGTTTATCAGCGTCTTGCATTACAATGTACTGCAGGTCATAAATTGTCAGTCAGGGTCCCTACCAAACCACTGTTGGCAAAAAGTGGTAGAAATGCCACCAAATATAAAGTGAGATGGAGAAATCTGCAGCAATGTCAGA…	ALA	notfound	notfound	GLY	notfound	notfound	notfound	notfound	LEU	notfound	notfound	LEU	notfound	notfound	notfound	3	Normandy, France	BGP	Dairy
BGQ	no	> BGQ_YDL227C_HO chromosome4:46271-48031 - 692 ATGCTTTCTGAAAACACGACTATTCTGATGGCTAACGGTGAAATTAAAGACATCGCAAACGTCACGGCTAACTCTTACGTTATGTGCGCAGATGGCTCCGCTGCCCGCGTCATAAATGTCACACAGGGCTATCAGAAAATCTATAATATACAGCAAAAAACCAAACACAGAGCTTTTGAAGGTGAACCTGGTAGGTTAGATCCCAGGCGTAGAACAGTTTATCAGCGTCTTGCATTACAATGTACTGCAGGTCATAAATTGTCAGTCAGGGTCCCTACCAAACCACTGTTGGMAAAAAGTGGTAGAAATGCCACCAAATATAAAGTGAGATGGAGAAATCTGCAGCAATGTC…	BGQ_YDL227C_HO chromosome4:46271-48031 - 692ATGCTTTCTGAAAACACGACTATTCTGATGGCTAACGGTGAAATTAAAGACATCGCAAACGTCACGGCTAACTCTTACGTTATGTGCGCAGATGGCTCCGCTGCCCGCGTCATAAATGTCACACAGGGCTATCAGAAAATCTATAATATACAGCAAAAAACCAAACACAGAGCTTTTGAAGGTGAACCTGGTAGGTTAGATCCCAGGCGTAGAACAGTTTATCAGCGTCTTGCATTACAATGTACTGCAGGTCATAAATTGTCAGTCAGGGTCCCTACCAAACCACTGTTGGMAAAAAGTGGTAGAAATGCCACCAAATATAAAGTGAGATGGAGAAATCTGCAGCAATGTCAGA…	ALA	notfound	notfound	GLY	notfound	notfound	notfound	notfound	LEU	notfound	notfound	LEU	notfound	notfound	notfound	3	Normandy, France	BGQ	Dairy
BGR	no	> BGR_YDL227C_HO chromosome4:46271-48031 - 692 ATGCTTTCTGAAAACACGACTATTCTGATGGCTAACGGTGAAATTAAAGACATCGCAAACGTCACGGCTAACTCTTACGTTATGTGCGCAGATGGCTCCGCTGCCCGCGTCATAAATGTCACACAGGGCTATCAGAAAATCTATAATATACAGCAAAAAACCAAACACAGAGCTTTTGAAGGTGAACCTGGTAGGTTAGATCCCAGGCGTAGAACAGTTTATCAGCGTCTTGCATTACAATGTACTGCAGGTCATAAATTGTCAGTCAGGGTCCCTACCAAACCACTGTTGGAAAAAAGTGGTAGAAATGCCACCAAATATAAAGTGAGATGGAGAAATCTGCAGCAATGTC…	BGR_YDL227C_HO chromosome4:46271-48031 - 692ATGCTTTCTGAAAACACGACTATTCTGATGGCTAACGGTGAAATTAAAGACATCGCAAACGTCACGGCTAACTCTTACGTTATGTGCGCAGATGGCTCCGCTGCCCGCGTCATAAATGTCACACAGGGCTATCAGAAAATCTATAATATACAGCAAAAAACCAAACACAGAGCTTTTGAAGGTGAACCTGGTAGGTTAGATCCCAGGCGTAGAACAGTTTATCAGCGTCTTGCATTACAATGTACTGCAGGTCATAAATTGTCAGTCAGGGTCCCTACCAAACCACTGTTGGAAAAAAGTGGTAGAAATGCCACCAAATATAAAGTGAGATGGAGAAATCTGCAGCAATGTCAGA…	ALA	notfound	notfound	GLY	notfound	notfound	notfound	notfound	LEU	notfound	notfound	LEU	notfound	notfound	notfound	3	Normandy, France	BGR	Dairy
BGS	no	> BGS_YDL227C_HO chromosome4:46271-48031 - 692 ATGCTTTCTGAAAACACGACTATTCTGATGGCTAACGGTGAAATTAAAGACATCGCAAACGTCACGGCTAACTCTTACGTTATGTGCGCAGATGGCTCCGCTGCCCGCGTCATAAATGTCACACAGGGCTATCAGAAAATCTATAATATACAGCAAAAAACCAAACACAGAGCTTTTGAAGGTGAACCTGGTAGGTTAGATCCCAGGCGTAGAACAGTTTATCAGCGTCTTGCATTACAATGTACTGCAGGTCATAAATTGTCAGTCAGGGTCCCTACCAAACCACTGTTGGAAAAAAGTGGTAGAAATGCCACCAAATATAAAGTGAGATGGAGAAATCTGCAGCAATGTC…	BGS_YDL227C_HO chromosome4:46271-48031 - 692ATGCTTTCTGAAAACACGACTATTCTGATGGCTAACGGTGAAATTAAAGACATCGCAAACGTCACGGCTAACTCTTACGTTATGTGCGCAGATGGCTCCGCTGCCCGCGTCATAAATGTCACACAGGGCTATCAGAAAATCTATAATATACAGCAAAAAACCAAACACAGAGCTTTTGAAGGTGAACCTGGTAGGTTAGATCCCAGGCGTAGAACAGTTTATCAGCGTCTTGCATTACAATGTACTGCAGGTCATAAATTGTCAGTCAGGGTCCCTACCAAACCACTGTTGGAAAAAAGTGGTAGAAATGCCACCAAATATAAAGTGAGATGGAGAAATCTGCAGCAATGTCAGA…	ALA	notfound	notfound	GLY	notfound	notfound	notfound	notfound	LEU	notfound	notfound	LEU	notfound	notfound	notfound	3	Normandy, France	BGS	Dairy
BGT	no	> BGT_YDL227C_HO chromosome4:46271-48031 - 692 ATGCTTTCTGAAAACACGACTATTCTGATGGCTAACGGTGAAATTAAAGACATCGCAAACGTCACGGCTAACTCTTACGTTATGTGCGCAGATGGCTCCGCTGCCCGCGTCATAAATGTCACACAGGGCTATCAGAAAATCTATAATATACAGCAAAAAACCAAACACAGAGCTTTTGAAGGTGAACCTGGTAGGTTAGATCCCAGGCGTAGAACAGTTTATCAGCGTCTTGCATTACAATGTACTGCAGGTCATAAATTGTCAGTCAGGGTCCCTACCAAACCACTGTTGGCAAAAAGTGGTAGAAATGCCACCAAATATAAAGTGAGATGGAGAAATCTGCAGCAATGTC…	BGT_YDL227C_HO chromosome4:46271-48031 - 692ATGCTTTCTGAAAACACGACTATTCTGATGGCTAACGGTGAAATTAAAGACATCGCAAACGTCACGGCTAACTCTTACGTTATGTGCGCAGATGGCTCCGCTGCCCGCGTCATAAATGTCACACAGGGCTATCAGAAAATCTATAATATACAGCAAAAAACCAAACACAGAGCTTTTGAAGGTGAACCTGGTAGGTTAGATCCCAGGCGTAGAACAGTTTATCAGCGTCTTGCATTACAATGTACTGCAGGTCATAAATTGTCAGTCAGGGTCCCTACCAAACCACTGTTGGCAAAAAGTGGTAGAAATGCCACCAAATATAAAGTGAGATGGAGAAATCTGCAGCAATGTCAGA…	ALA	notfound	notfound	GLY	notfound	notfound	notfound	notfound	LEU	notfound	notfound	LEU	notfound	notfound	notfound	3	Alpes, France	BGT	Dairy
BGV	no	> BGV_YDL227C_HO chromosome4:46271-48031 - 692 ATGCTTTCTGAAAACACGACTATTCTGATGGCTAACGGTGAAATTAAAGACATCGCAAACGTCACGGCTAACTCTTACGTTATGTGCGCAGATGGCTCCGCTGCCCGCGTCATAAATGTCACACAGGGCTATCAGAAAATCTATAATATACAGCAAAAAACCAAACACAGAGCTTTTGAAGGTGAACCTGGTAGGTTAGATCCCAGGCGTAGAACAGTTTATCAGCGTCTTGCATTACAATGTACTGCAGGTCATAAATTGTCAGTCAGGGTCCCTACCAAACCACTGTTGGCAAAAAGTGGTAGAAATGCCACCAAATATAAAGTGAGATGGAGAAATCTGCAGCAATGTC…	BGV_YDL227C_HO chromosome4:46271-48031 - 692ATGCTTTCTGAAAACACGACTATTCTGATGGCTAACGGTGAAATTAAAGACATCGCAAACGTCACGGCTAACTCTTACGTTATGTGCGCAGATGGCTCCGCTGCCCGCGTCATAAATGTCACACAGGGCTATCAGAAAATCTATAATATACAGCAAAAAACCAAACACAGAGCTTTTGAAGGTGAACCTGGTAGGTTAGATCCCAGGCGTAGAACAGTTTATCAGCGTCTTGCATTACAATGTACTGCAGGTCATAAATTGTCAGTCAGGGTCCCTACCAAACCACTGTTGGCAAAAAGTGGTAGAAATGCCACCAAATATAAAGTGAGATGGAGAAATCTGCAGCAATGTCAGA…	ALA	notfound	notfound	GLY	notfound	notfound	notfound	notfound	LEU	notfound	notfound	LEU	notfound	notfound	notfound	3	Alpes, France	BGV	Dairy
ARA	no	> ARA_YDL227C_HO chromosome4:46271-48031 - 692 ATGCTTTCTGAAAACACGACTATTCTGATGGCTAACGGTGAAATTAAAGACATCGCAAACGTCACGGCTAACTCTTACGTTATGTGCGCAGATGGCTCCGCTGCCCGCGTCATAAATGTCACACAGGGCTATCAGAAAATCTATAATATACAGCAAAAAACCAAACACAGAGCTTTTGAAGGTGAACCTGGTAGGTTAGATCCCAGGCATAGAACAGTTTATCAGCGTCTTGCATTACAATGTACTGCAGGTCATAAATTGTCAGTCAGGGTCCCTACCAAACCACTGTTGGAAAAAAGTGGTAGAAATGCCACCAAATATAAAGTGAGATGGAGAAATCTGCAGCAATGTC…	ARA_YDL227C_HO chromosome4:46271-48031 - 692ATGCTTTCTGAAAACACGACTATTCTGATGGCTAACGGTGAAATTAAAGACATCGCAAACGTCACGGCTAACTCTTACGTTATGTGCGCAGATGGCTCCGCTGCCCGCGTCATAAATGTCACACAGGGCTATCAGAAAATCTATAATATACAGCAAAAAACCAAACACAGAGCTTTTGAAGGTGAACCTGGTAGGTTAGATCCCAGGCATAGAACAGTTTATCAGCGTCTTGCATTACAATGTACTGCAGGTCATAAATTGTCAGTCAGGGTCCCTACCAAACCACTGTTGGAAAAAAGTGGTAGAAATGCCACCAAATATAAAGTGAGATGGAGAAATCTGCAGCAATGTCAGA…	ALA	notfound	notfound	GLY	notfound	notfound	notfound	notfound	LEU	notfound	notfound	LEU	notfound	notfound	notfound	3	NA	ARA	Distillery
BBM	no	> BBM_YDL227C_HO chromosome4:46271-48031 - 692 ATGCTTTCTGAAAACACGACTATTCTGATGGCCAACGGTGAAATTAAAGACATCGCAAACGTCACGGCTAACTCTTACGTTATGTGCGCAGATGGCTCCGCTGCCCGCGTCATAAATGTCACACAGGGCTATCAGAAAATCTATAATATACAGCAAAAAACCAAACACAGAGCTTTTGAAGGTGAACCTGGTAGGTTAGATCCCAGGCGTAGAACAGTTTATCAGCGTCTTGCATTACAATGTACTGCAGGTCATAAATTGTCAGTCAGGGTCCCTACCAAACCACTGTTGGAAAAAAGTGGTAGAAATGCCACCAAATATAAAGTGAGATGGAGAAATCTGCAGCAATGTC…	BBM_YDL227C_HO chromosome4:46271-48031 - 692ATGCTTTCTGAAAACACGACTATTCTGATGGCCAACGGTGAAATTAAAGACATCGCAAACGTCACGGCTAACTCTTACGTTATGTGCGCAGATGGCTCCGCTGCCCGCGTCATAAATGTCACACAGGGCTATCAGAAAATCTATAATATACAGCAAAAAACCAAACACAGAGCTTTTGAAGGTGAACCTGGTAGGTTAGATCCCAGGCGTAGAACAGTTTATCAGCGTCTTGCATTACAATGTACTGCAGGTCATAAATTGTCAGTCAGGGTCCCTACCAAACCACTGTTGGAAAAAAGTGGTAGAAATGCCACCAAATATAAAGTGAGATGGAGAAATCTGCAGCAATGTCAGA…	ALA	notfound	notfound	GLY	notfound	notfound	notfound	notfound	LEU	notfound	notfound	LEU	notfound	notfound	notfound	3	Jalisco, Mexico	BBM	Distillery
BRM	no	> BRM_YDL227C_HO chromosome4:46271-48031 - 692 ATGCTTTCTGAAAACACGACTATTCTGATGGCTAACGGTGAAATTAAAGACATCGCAAACGTCACGGCTAACTCTTACGTTATGTGCGCAGATGGCTCCGCTGCCCGCGTCATAAATGTCACACAGGGCTATCAGAAAATCTATAATATACAGCAAAAAACCAAACACAGAGCTTTTGAAGGTGAACCTGGTAGGTTAGATCCCAGGCGTAGAACAGTTTATCAGCGTCTTGCATTACAATGTACTGCAGGTCATAAATTGTCAGTCAGGGTCCCTACCAAACCACTGTTGGAAAAAAGTGGTAGAAATGCCACCAAATATAAAGTGAGATGGAGAAATCTGCAGCAATGTC…	BRM_YDL227C_HO chromosome4:46271-48031 - 692ATGCTTTCTGAAAACACGACTATTCTGATGGCTAACGGTGAAATTAAAGACATCGCAAACGTCACGGCTAACTCTTACGTTATGTGCGCAGATGGCTCCGCTGCCCGCGTCATAAATGTCACACAGGGCTATCAGAAAATCTATAATATACAGCAAAAAACCAAACACAGAGCTTTTGAAGGTGAACCTGGTAGGTTAGATCCCAGGCGTAGAACAGTTTATCAGCGTCTTGCATTACAATGTACTGCAGGTCATAAATTGTCAGTCAGGGTCCCTACCAAACCACTGTTGGAAAAAAGTGGTAGAAATGCCACCAAATATAAAGTGAGATGGAGAAATCTGCAGCAATGTCAGA…	ALA	notfound	notfound	GLY	notfound	notfound	notfound	notfound	LEU	notfound	notfound	LEU	notfound	notfound	notfound	3	Brazil	BRM	Distillery
BTV	no	> BTV_YDL227C_HO chromosome4:46271-48031 - 692 ATGCTTTCTGAAAACACGACTATTCTGATGGCTAACGGTGAAATTAAAGACATCGCAAACGTCACGGCTAACTCTTACGTTATGTGCGCAGATGGCTCCGCTGCCCGCGTCATAAATGTCACACAGGGCTATCAGAAAATCTATAATATACAGCAAAAAACCAAACACAGAGCTTTTGAAGGTGAACCTGGTAGGTTAGATCCCAGGCGTAGAACAGTTTATCAGCGTCTTGCATTACAATGTACTGCAGGTCATAAATTGTCAGTCAGGGTCCCTACCAAACCACTGTTGGAAAAAAGTGGTAGAAATGCCACCAAATATAAAGTGAGATGGAGAAATCTGCAGCAATGTC…	BTV_YDL227C_HO chromosome4:46271-48031 - 692ATGCTTTCTGAAAACACGACTATTCTGATGGCTAACGGTGAAATTAAAGACATCGCAAACGTCACGGCTAACTCTTACGTTATGTGCGCAGATGGCTCCGCTGCCCGCGTCATAAATGTCACACAGGGCTATCAGAAAATCTATAATATACAGCAAAAAACCAAACACAGAGCTTTTGAAGGTGAACCTGGTAGGTTAGATCCCAGGCGTAGAACAGTTTATCAGCGTCTTGCATTACAATGTACTGCAGGTCATAAATTGTCAGTCAGGGTCCCTACCAAACCACTGTTGGAAAAAAGTGGTAGAAATGCCACCAAATATAAAGTGAGATGGAGAAATCTGCAGCAATGTCAGA…	ALA	notfound	notfound	GLY	notfound	notfound	notfound	notfound	LEU	notfound	notfound	LEU	notfound	notfound	notfound	3	Brazil	BTV	Distillery
CPI	no	> CPI_YDL227C_HO chromosome4:46271-48031 - 692 ATGCTTTCCGAAAACACGACTATTCTGATGGCTAACGGTGAAATTAAAGACATCGCAAACGTCACGGCTAACTCTTACGTTATGTGCGCAGATGGCTCCGCTGCCCGCGTCATAAATGTCACACAGGGCTATCAGAAAATCTATAATATACAGCAAAAACCCAAACACAGAGCTTTTGAAGGTGAACCTGGTAGGTTAGATCCCAGGCGTAGAACAGTTTATCAGCGTCTTGCATTACAATGTACTGCAGGTCATAAATTGTCAGTCAGGGTCCCTACCAAACCACTGTTGGAAAAAAGTGGTAGAAATGCCACCAAATATAAAGTGAGATGGAGAAATCTGCAGCAATGTC…	CPI_YDL227C_HO chromosome4:46271-48031 - 692ATGCTTTCCGAAAACACGACTATTCTGATGGCTAACGGTGAAATTAAAGACATCGCAAACGTCACGGCTAACTCTTACGTTATGTGCGCAGATGGCTCCGCTGCCCGCGTCATAAATGTCACACAGGGCTATCAGAAAATCTATAATATACAGCAAAAACCCAAACACAGAGCTTTTGAAGGTGAACCTGGTAGGTTAGATCCCAGGCGTAGAACAGTTTATCAGCGTCTTGCATTACAATGTACTGCAGGTCATAAATTGTCAGTCAGGGTCCCTACCAAACCACTGTTGGAAAAAAGTGGTAGAAATGCCACCAAATATAAAGTGAGATGGAGAAATCTGCAGCAATGTCAGA…	ALA	notfound	notfound	GLY	notfound	notfound	notfound	notfound	LEU	notfound	notfound	LEU	notfound	notfound	notfound	3	Tamaulipas, Mexico	CPI	Distillery
CPK	no	> CPK_YDL227C_HO chromosome4:46271-48031 - 692 ATGCTTTCCGAAAACACGACTATTCTGATGGCTAACGGTGAAATTAAAGACATCGCAAACGTCACGGCTAACTCTTACGTTATGTGCGCAGATGGCTCCGCTGCCCGCGTCATAAATGTCACACAGGGCTATCAGAAAATCTATAATATACAGCAAAAACCCAAACACAGAGCTTTTGAAGGTGAACCTGGTAGGTTAGATCCCAGGCGTAGAACAGTTTATCAGCGTCTTGCATTACAATGTACTGCAGGTCATAAATTGTCAGTCAGGGTCCCTACCAAACCACTGTTGGAAAAAAGTGGTAGAAATGCCACCAAATATAAAGTGAGATGGAGAAATCTGCAGCAATGTC…	CPK_YDL227C_HO chromosome4:46271-48031 - 692ATGCTTTCCGAAAACACGACTATTCTGATGGCTAACGGTGAAATTAAAGACATCGCAAACGTCACGGCTAACTCTTACGTTATGTGCGCAGATGGCTCCGCTGCCCGCGTCATAAATGTCACACAGGGCTATCAGAAAATCTATAATATACAGCAAAAACCCAAACACAGAGCTTTTGAAGGTGAACCTGGTAGGTTAGATCCCAGGCGTAGAACAGTTTATCAGCGTCTTGCATTACAATGTACTGCAGGTCATAAATTGTCAGTCAGGGTCCCTACCAAACCACTGTTGGAAAAAAGTGGTAGAAATGCCACCAAATATAAAGTGAGATGGAGAAATCTGCAGCAATGTCAGA…	ALA	notfound	notfound	GLY	notfound	notfound	notfound	notfound	LEU	notfound	notfound	LEU	notfound	notfound	notfound	3	Tamaulipas, Mexico	CPK	Distillery
CPL	no	> CPL_YDL227C_HO chromosome4:46271-48031 - 692 ATGCTTTCCGAAAACACGACTATTCTGATGGCTAACGGTGAAATTAAAGACATCGCAAACGTCACGGCTAACTCTTACGTTATGTGCGCAGATGGCTCCGCTGCCCGCGTCATAAATGTCACACAGGGCTATCAGAAAATCTATAATATACAGCAAAAACCCAAACACAGAGCTTTTGAAGGTGAACCTGGTAGGTTAGATCCCAGGCGTAGAACAGTTTATCAGCGTCTTGCATTACAATGTACTGCAGGTCATAAATTGTCAGTCAGGGTCCCTACCAAACCACTGTTGGAAAAAAGTGGTAGAAATGCCACCAAATATAAAGTGAGATGGAGAAATCTGCAGCAATGTC…	CPL_YDL227C_HO chromosome4:46271-48031 - 692ATGCTTTCCGAAAACACGACTATTCTGATGGCTAACGGTGAAATTAAAGACATCGCAAACGTCACGGCTAACTCTTACGTTATGTGCGCAGATGGCTCCGCTGCCCGCGTCATAAATGTCACACAGGGCTATCAGAAAATCTATAATATACAGCAAAAACCCAAACACAGAGCTTTTGAAGGTGAACCTGGTAGGTTAGATCCCAGGCGTAGAACAGTTTATCAGCGTCTTGCATTACAATGTACTGCAGGTCATAAATTGTCAGTCAGGGTCCCTACCAAACCACTGTTGGAAAAAAGTGGTAGAAATGCCACCAAATATAAAGTGAGATGGAGAAATCTGCAGCAATGTCAGA…	ALA	notfound	notfound	GLY	notfound	notfound	notfound	notfound	LEU	notfound	notfound	LEU	notfound	notfound	notfound	3	Tamaulipas, Mexico	CPL	Distillery
CPM	no	> CPM_YDL227C_HO chromosome4:46271-48031 - 692 ATGCTTTCCGAAAACACGACTATTCTGATGGCTAACGGTGAAATTAAAGACATCGCAAACGTCACGGCTAACTCTTACGTTATGTGCGCAGATGGCTCCGCTGCCCGCGTCATAAATGTCACACAGGGCTATCAGAAAATCTATAATATACAGCAAAAACCCAAACACAGAGCTTTTGAAGGTGAACCTGGTAGGTTAGATCCCAGGCGTAGAACAGTTTATCAGCGTCTTGCATTACAATGTACTGCAGGTCATAAATTGTCAGTCAGGGTCCCTACCAAACCACTGTTGGAAAAAAGTGGTAGAAATGCCACCAAATATAAAGTGAGATGGAGAAATCTGCAGCAATGTC…	CPM_YDL227C_HO chromosome4:46271-48031 - 692ATGCTTTCCGAAAACACGACTATTCTGATGGCTAACGGTGAAATTAAAGACATCGCAAACGTCACGGCTAACTCTTACGTTATGTGCGCAGATGGCTCCGCTGCCCGCGTCATAAATGTCACACAGGGCTATCAGAAAATCTATAATATACAGCAAAAACCCAAACACAGAGCTTTTGAAGGTGAACCTGGTAGGTTAGATCCCAGGCGTAGAACAGTTTATCAGCGTCTTGCATTACAATGTACTGCAGGTCATAAATTGTCAGTCAGGGTCCCTACCAAACCACTGTTGGAAAAAAGTGGTAGAAATGCCACCAAATATAAAGTGAGATGGAGAAATCTGCAGCAATGTCAGA…	ALA	notfound	notfound	GLY	notfound	notfound	notfound	notfound	LEU	notfound	notfound	LEU	notfound	notfound	notfound	3	Tamaulipas, Mexico	CPM	Distillery
SACE_YAB	no	> SACE_YAB_YDL227C_HO chromosome4:46271-48031 - 692 ATGCTTTCTGAAAACACGACTATTCTGATGGCTAACGGTGAAATTAAAGACATCGCAAACGTCACGGCTAACTCTTACGTTATGTGCGCAGATGGCTCCGCTGCCCGCGTCATAAATGTCACACAGGGCTATCAGAAAATCTATAATATACAGCAAAAAACCAAACACAGAGCTTTTGAAGGTGAACCTGGTAGGTTAGATCCCAGGCGTAGAACAGTTTATCAGCGTCTTGCATTACAATGTACTGCAGGTCATAAATTGTCAGTCAGGGTCCCTACCAAACCACTGTTGGAAAAAAGTGGTAGAAATGCCACCAAATATAAAGTGAGATGGAGAAATCTGCAGCA…	SACE_YAB_YDL227C_HO chromosome4:46271-48031 - 692ATGCTTTCTGAAAACACGACTATTCTGATGGCTAACGGTGAAATTAAAGACATCGCAAACGTCACGGCTAACTCTTACGTTATGTGCGCAGATGGCTCCGCTGCCCGCGTCATAAATGTCACACAGGGCTATCAGAAAATCTATAATATACAGCAAAAAACCAAACACAGAGCTTTTGAAGGTGAACCTGGTAGGTTAGATCCCAGGCGTAGAACAGTTTATCAGCGTCTTGCATTACAATGTACTGCAGGTCATAAATTGTCAGTCAGGGTCCCTACCAAACCACTGTTGGAAAAAAGTGGTAGAAATGCCACCAAATATAAAGTGAGATGGAGAAATCTGCAGCAATG…	ALA	notfound	notfound	GLY	notfound	notfound	notfound	notfound	LEU	notfound	notfound	LEU	notfound	notfound	notfound	3	NA	SACE_YAB	Distillery
SACE_YCE	no	> SACE_YCE_YDL227C_HO chromosome4:46271-48031 - 692 ATGCTTTCTGAAAACACGACTATTCTGATGGCTAACGGTGAAATTAAAGACATCGCAAACGTCACGGCTAACTCTTACGTTATGTGCGCAGATGGCTCCGCTGCCCGCGTCATAAATGTCACACAGGGCTATCAGAAAATCTATAATATACAGCAAAAAACCAAACACAGAGCTTTTGAAGGTGAACCTGGTAGGTTAGATCCCAGGCGTAGAACAGTTTATCAGCGTCTTGCTTTACAATGTACTGCAGGTCATAAATTGTCAGTCAGGGTCCCTACCAAACCACTGTTGGAAAAAAGTGGTAGAAATGCCACCAAATATAAAGTGAGATGGAGAAATCTGCAGCA…	SACE_YCE_YDL227C_HO chromosome4:46271-48031 - 692ATGCTTTCTGAAAACACGACTATTCTGATGGCTAACGGTGAAATTAAAGACATCGCAAACGTCACGGCTAACTCTTACGTTATGTGCGCAGATGGCTCCGCTGCCCGCGTCATAAATGTCACACAGGGCTATCAGAAAATCTATAATATACAGCAAAAAACCAAACACAGAGCTTTTGAAGGTGAACCTGGTAGGTTAGATCCCAGGCGTAGAACAGTTTATCAGCGTCTTGCTTTACAATGTACTGCAGGTCATAAATTGTCAGTCAGGGTCCCTACCAAACCACTGTTGGAAAAAAGTGGTAGAAATGCCACCAAATATAAAGTGAGATGGAGAAATCTGCAGCAATG…	ALA	notfound	notfound	GLY	notfound	notfound	notfound	notfound	LEU	notfound	notfound	LEU	notfound	notfound	notfound	3	Trinidad	SACE_YCE	Distillery
ANN	no	> ANN_YDL227C_HO chromosome4:46271-48031 - 692 ATGCTTTCTGAAAACACGACTATTCTGATGGCTAACGGTGAAATTAAAGACATCGCAAACGTCACGGCTAACTCTTACGTTATGTGCGCAGATGGTTCCGCTGCCCGCGTCATAAATGTCACACAGGGCTATCAGAAAATCTATAATATACAGCAAAAAACCAAACACAGAGCTTTTGAAGGTGAACCTGGTAGGTTAGATCCCAGGCGTAGAACAGTTTATCAGCGTCTTGCATTACAATGTACTGCAGGTCATAAATTGTCAGTCAGGGTCCCTACCAAACCACTGTTGGAAAAAAGTGGTAGAAATGCCACCAAATATAAAGTGAGATGGAGAAATCTGCAGCAATGTC…	ANN_YDL227C_HO chromosome4:46271-48031 - 692ATGCTTTCTGAAAACACGACTATTCTGATGGCTAACGGTGAAATTAAAGACATCGCAAACGTCACGGCTAACTCTTACGTTATGTGCGCAGATGGTTCCGCTGCCCGCGTCATAAATGTCACACAGGGCTATCAGAAAATCTATAATATACAGCAAAAAACCAAACACAGAGCTTTTGAAGGTGAACCTGGTAGGTTAGATCCCAGGCGTAGAACAGTTTATCAGCGTCTTGCATTACAATGTACTGCAGGTCATAAATTGTCAGTCAGGGTCCCTACCAAACCACTGTTGGAAAAAAGTGGTAGAAATGCCACCAAATATAAAGTGAGATGGAGAAATCTGCAGCAATGTCAGA…	ALA	notfound	notfound	GLY	notfound	notfound	notfound	notfound	LEU	notfound	notfound	LEU	notfound	notfound	notfound	3	Ghana	ANN	Fermentation
ARH	no	> ARH_YDL227C_HO chromosome4:46271-48031 - 692 ATGCTTTCTGAAAACACGACTATTCTGATGGCTAACGGTGAAATTAAAGACATCGCAAACGTCACGGCTAACTCTTACGTTATGTGCGCAGATGGCTCCGCTGCCCGCGTCATAAATGTCACACAGGGCTATCAGAAAATCTATAATATACAGCAAAAAACCAAACACAGAGCTTTTGAAGGTGAACCTGGTAGGTTAGATCCCAGGCGTAGAACAGTTTATCAGCGTCTTGCATTACAATGTACTGCAGGTCATAAATTGTCAGTCAGGGTCCCTACCAAACCACTGTTGGAAAAAAGTGGTAGAAATGCCACCAAATATAAAGTGAGATGGAGAAATCTGCAGCAATGTC…	ARH_YDL227C_HO chromosome4:46271-48031 - 692ATGCTTTCTGAAAACACGACTATTCTGATGGCTAACGGTGAAATTAAAGACATCGCAAACGTCACGGCTAACTCTTACGTTATGTGCGCAGATGGCTCCGCTGCCCGCGTCATAAATGTCACACAGGGCTATCAGAAAATCTATAATATACAGCAAAAAACCAAACACAGAGCTTTTGAAGGTGAACCTGGTAGGTTAGATCCCAGGCGTAGAACAGTTTATCAGCGTCTTGCATTACAATGTACTGCAGGTCATAAATTGTCAGTCAGGGTCCCTACCAAACCACTGTTGGAAAAAAGTGGTAGAAATGCCACCAAATATAAAGTGAGATGGAGAAATCTGCAGCAATGTCAGA…	ALA	notfound	notfound	GLY	notfound	notfound	notfound	notfound	LEU	notfound	notfound	LEU	notfound	notfound	notfound	3	Java, Indonesia	ARH	Fermentation
ARI	no	> ARI_YDL227C_HO chromosome4:46271-48031 - 692 ATGCTTTCTGAAAACACGACTATTCTGATGGCTAACGGTGAAATTAAAGACATCGCAAACGTCACGGCTAACTCTTACGTTATGTGCGCAGATGGCTCCGCTGCCCGCGTCATAAATGTCACACAGGGCTATCAGAAAATCTATAATATACAGCAAAAAACCAAACACAGAGCTTTTGAAGGTGAACCTGGTAGGTTAGATCCCAGGCGTAGAACAGTTTATCAGCGTCTTGCATTACAATGTACTGCAGGTCATAAATTGTCAGTCAGGGTCCCTACCAAACCACTGTTGGAAAAAAGTGGTAGAAATGCCACCAAATATAAAGTGAGATGGAGAAATCTGCAGCAATGTC…	ARI_YDL227C_HO chromosome4:46271-48031 - 692ATGCTTTCTGAAAACACGACTATTCTGATGGCTAACGGTGAAATTAAAGACATCGCAAACGTCACGGCTAACTCTTACGTTATGTGCGCAGATGGCTCCGCTGCCCGCGTCATAAATGTCACACAGGGCTATCAGAAAATCTATAATATACAGCAAAAAACCAAACACAGAGCTTTTGAAGGTGAACCTGGTAGGTTAGATCCCAGGCGTAGAACAGTTTATCAGCGTCTTGCATTACAATGTACTGCAGGTCATAAATTGTCAGTCAGGGTCCCTACCAAACCACTGTTGGAAAAAAGTGGTAGAAATGCCACCAAATATAAAGTGAGATGGAGAAATCTGCAGCAATGTCAGA…	ALA	notfound	notfound	GLY	notfound	notfound	notfound	notfound	LEU	notfound	notfound	LEU	notfound	notfound	notfound	3	Java, Indonesia	ARI	Fermentation
BHP	no	> BHP_YDL227C_HO chromosome4:46271-48031 - 692 ATGCTTTCTGAAAACACGACTATTCTGATGGCTAACGGTGAAATTAAAGACATCGCAAACGTCACGGCTAACTCTTACGTTATGTGCGCAGATGGCTCCGCTGCCCGCGTCATAAATGTCACACAGGGCTATCAGAAAATCTATAATATACAGCAAAAAACCAAACACAGAGCTTTTGAAGGTGAACCTGGTAGGTTAGATCCCAGGCGTAGAACAGTTTATCAGCGTCTTGCATTACAATGTACTGCAGGTCATAAATTGTCAGTCAGGGTCCCTACCAAACCACTGTTGGAAAAAAGTGGTAGAAATGCCACCAAATATAAAGTGAGATGGAGAAATCTGCAGCAATGTC…	BHP_YDL227C_HO chromosome4:46271-48031 - 692ATGCTTTCTGAAAACACGACTATTCTGATGGCTAACGGTGAAATTAAAGACATCGCAAACGTCACGGCTAACTCTTACGTTATGTGCGCAGATGGCTCCGCTGCCCGCGTCATAAATGTCACACAGGGCTATCAGAAAATCTATAATATACAGCAAAAAACCAAACACAGAGCTTTTGAAGGTGAACCTGGTAGGTTAGATCCCAGGCGTAGAACAGTTTATCAGCGTCTTGCATTACAATGTACTGCAGGTCATAAATTGTCAGTCAGGGTCCCTACCAAACCACTGTTGGAAAAAAGTGGTAGAAATGCCACCAAATATAAAGTGAGATGGAGAAATCTGCAGCAATGTCAGA…	ALA	notfound	notfound	GLY	notfound	notfound	notfound	notfound	LEU	notfound	notfound	LEU	notfound	notfound	notfound	3	Laos	BHP	Fermentation
BHQ	no	> BHQ_YDL227C_HO chromosome4:46271-48031 - 692 ATGCTTTCTGAAAACACGACTATTCTGATGGCTAACGGTGAAATTAAAGACATCGCAAACGTCACGGCTAACTCTTACGTTATGTGCGCAGATGGCTCCGCTGCCCGCGTCATAAATGTCACACAGGGCTATCAGAAAATCTATAATATACAGCAAAAAACCAAACACAGAGCTTTTGAAGGTGAACCTGGTAGGTTAGATCCCAGGCGTAGAACAGTTTATCAGCGTCTTGCATTACAATGTACTGCAGGTCATAAATTGTCAGTCAGGGTCCCTACCAAACCACTGTTGGAAAAAAGTGGTAGAAATGCCACCAAATATAAAGTGAGATGGAGAAATCTGCAGCAATGTC…	BHQ_YDL227C_HO chromosome4:46271-48031 - 692ATGCTTTCTGAAAACACGACTATTCTGATGGCTAACGGTGAAATTAAAGACATCGCAAACGTCACGGCTAACTCTTACGTTATGTGCGCAGATGGCTCCGCTGCCCGCGTCATAAATGTCACACAGGGCTATCAGAAAATCTATAATATACAGCAAAAAACCAAACACAGAGCTTTTGAAGGTGAACCTGGTAGGTTAGATCCCAGGCGTAGAACAGTTTATCAGCGTCTTGCATTACAATGTACTGCAGGTCATAAATTGTCAGTCAGGGTCCCTACCAAACCACTGTTGGAAAAAAGTGGTAGAAATGCCACCAAATATAAAGTGAGATGGAGAAATCTGCAGCAATGTCAGA…	ALA	notfound	notfound	GLY	notfound	notfound	notfound	notfound	LEU	notfound	notfound	LEU	notfound	notfound	notfound	3	Laos	BHQ	Fermentation
BHR	no	> BHR_YDL227C_HO chromosome4:46271-48031 - 692 ATGCTTTCTGAAAACACGACTATTCTGATGGCTAACGGTGAAATTAAAGACATCGCAAACGTCACGGCTAACTCTTACGTTATGTGCGCAGATGGCTCCGCTGCCCGCGTCATAAATGTCACACAGGGCTATCAGAAAATCTATAATATACAGCAAAAAACCAAACACAGAGCTTTTGAAGGTGAACCTGGTAGGTTAGATCCCAGGCGTAGAACAGTTTATCAGCGTCTTGCATTACAATGTACTGCAGGTCATAAATTGTCAGTCAGGGTCCCTACCAAACCACTGTTGGAAAAAAGTGGTAGAAATGCCACCAAATATAAAGTGAGATGGAGAAATCTGCAGCAATGTC…	BHR_YDL227C_HO chromosome4:46271-48031 - 692ATGCTTTCTGAAAACACGACTATTCTGATGGCTAACGGTGAAATTAAAGACATCGCAAACGTCACGGCTAACTCTTACGTTATGTGCGCAGATGGCTCCGCTGCCCGCGTCATAAATGTCACACAGGGCTATCAGAAAATCTATAATATACAGCAAAAAACCAAACACAGAGCTTTTGAAGGTGAACCTGGTAGGTTAGATCCCAGGCGTAGAACAGTTTATCAGCGTCTTGCATTACAATGTACTGCAGGTCATAAATTGTCAGTCAGGGTCCCTACCAAACCACTGTTGGAAAAAAGTGGTAGAAATGCCACCAAATATAAAGTGAGATGGAGAAATCTGCAGCAATGTCAGA…	ALA	notfound	notfound	GLY	notfound	notfound	notfound	notfound	LEU	notfound	notfound	LEU	notfound	notfound	notfound	3	Laos	BHR	Fermentation
BHS	no	> BHS_YDL227C_HO chromosome4:46271-48031 - 692 ATGCTTTCTGAAAACACGACTATTCTGATGGCTAACGGTGAAATTAAAGACATCGCAAACGTCACGGCTAACTCTTACGTTATGTGCGCAGATGGCTCCGCTGCCCGCGTCATAAATGTCACACAGGGCTATCAGAAAATCTATAATATACAGCAAAAAACCAAACACAGAGCTTTTGAAGGTGAACCTGGTAGGTTAGATCCCAGGCGTAGAACAGTTTATCAGCGTCTTGCATTACAATGTACTGCAGGTCATAAATTGTCAGTCAGGGTCCCTACCAAACCACTGTTGGAAAAAAGTGGTAGAAATGCCACCAAATATAAAGTGAGATGGAGAAATCTGCAGCAATGTC…	BHS_YDL227C_HO chromosome4:46271-48031 - 692ATGCTTTCTGAAAACACGACTATTCTGATGGCTAACGGTGAAATTAAAGACATCGCAAACGTCACGGCTAACTCTTACGTTATGTGCGCAGATGGCTCCGCTGCCCGCGTCATAAATGTCACACAGGGCTATCAGAAAATCTATAATATACAGCAAAAAACCAAACACAGAGCTTTTGAAGGTGAACCTGGTAGGTTAGATCCCAGGCGTAGAACAGTTTATCAGCGTCTTGCATTACAATGTACTGCAGGTCATAAATTGTCAGTCAGGGTCCCTACCAAACCACTGTTGGAAAAAAGTGGTAGAAATGCCACCAAATATAAAGTGAGATGGAGAAATCTGCAGCAATGTCAGA…	ALA	notfound	notfound	GLY	notfound	notfound	notfound	notfound	LEU	notfound	notfound	LEU	notfound	notfound	notfound	3	Laos	BHS	Fermentation
CEP	no	> CEP_YDL227C_HO chromosome4:46271-48031 - 692 ATGCTTTCTGAAAACACGACTATTCTGATGGCTAACGGTGAAATTAAAGACATCGCAAACGTCACGGCTAACTCTTACGTTATGTGCGCAGATGGCTCCGCTGCCCGCGTCATAAATGTCACACAGGGCTATCAGAAAATCTATAATATACAGCAAAAAACCAAACACAGAGCTTTTGAAGGTGAACCTGGTAGGTTAGATCCCAGGCGTAGAACAGTTTATCAGCGTCTTGCATTACAATGTACTGCAGGTCATAAATTGTCAGTCAGGGTCCCTACAAAACCACTGTTGGAAAAAAGTGGTAGAAATGCCACCAAATATAAAGTGAGATGGAGAAATCTGCAGCAATGTC…	CEP_YDL227C_HO chromosome4:46271-48031 - 692ATGCTTTCTGAAAACACGACTATTCTGATGGCTAACGGTGAAATTAAAGACATCGCAAACGTCACGGCTAACTCTTACGTTATGTGCGCAGATGGCTCCGCTGCCCGCGTCATAAATGTCACACAGGGCTATCAGAAAATCTATAATATACAGCAAAAAACCAAACACAGAGCTTTTGAAGGTGAACCTGGTAGGTTAGATCCCAGGCGTAGAACAGTTTATCAGCGTCTTGCATTACAATGTACTGCAGGTCATAAATTGTCAGTCAGGGTCCCTACAAAACCACTGTTGGAAAAAAGTGGTAGAAATGCCACCAAATATAAAGTGAGATGGAGAAATCTGCAGCAATGTCAGA…	ALA	notfound	notfound	GLY	notfound	notfound	notfound	notfound	LEU	notfound	notfound	LEU	notfound	notfound	notfound	3	Philippines	CEP	Fermentation
CEQ	no	> CEQ_YDL227C_HO chromosome4:46271-48031 - 692 ATGCTTTCTGAAAACACGACTATTCTGATGGCTAACGGTGAAATTAAAGACATCGCAAACGTCACGGCTAACTCTTACGTTATGTGCGCAGATGGCTCCGCTGCCCGCGTCATAAATGTCACACAGGGCTATCAGAAAATCTATAATATACAGCAAAAAACCAAACACAGAGCTTTTGAAGGTGAACCTGGTAGGTTAGATCCCAGGCGTAGAACAGTTTATCAGCGTCTTGCATTACAATGTACTGCAGGTCATAAATTGTCAGTCAGGGTCCCTACCAAACCACTGTTGGAAAAAAGTGGTAGAAATGCCACCAAATATAAAGTGAGATGGAGAAATCTGCAGCAATGTC…	CEQ_YDL227C_HO chromosome4:46271-48031 - 692ATGCTTTCTGAAAACACGACTATTCTGATGGCTAACGGTGAAATTAAAGACATCGCAAACGTCACGGCTAACTCTTACGTTATGTGCGCAGATGGCTCCGCTGCCCGCGTCATAAATGTCACACAGGGCTATCAGAAAATCTATAATATACAGCAAAAAACCAAACACAGAGCTTTTGAAGGTGAACCTGGTAGGTTAGATCCCAGGCGTAGAACAGTTTATCAGCGTCTTGCATTACAATGTACTGCAGGTCATAAATTGTCAGTCAGGGTCCCTACCAAACCACTGTTGGAAAAAAGTGGTAGAAATGCCACCAAATATAAAGTGAGATGGAGAAATCTGCAGCAATGTCAGA…	ALA	notfound	notfound	GLY	notfound	notfound	notfound	notfound	LEU	notfound	notfound	LEU	notfound	notfound	notfound	3	Burundi	CEQ	Fermentation
CQE	no	> CQE_YDL227C_HO chromosome4:46271-48031 - 692 ATGCTTTCTGAAAACACGACTATTCTGATGGCTAACGGTGAAATTAAAGACATCGCAAACGTCACGGCTAACTCTTACGTTATGTGCGCAGATGGTTCCGCTGCCCGCGTCATAAATGTCACACAGGGCTATCAGAAAATCTATAATATACAGCAAAAAACCAAACACAGAGCTTTTGAAGGTGAACCTGGTAGGTTAGATCCCAGGCGTAGAACAGTTTATCAGCGTCTTGCATTACAATGTACTGCAGGTCATAAATTGTCAGTCAGGGTCCCTACCAAACCACTGTTGGAAAAAAGTGGTAGAAATGCCACCAAATATAAAGTGAGATGGAGAAATCTGCAGCAATGTC…	CQE_YDL227C_HO chromosome4:46271-48031 - 692ATGCTTTCTGAAAACACGACTATTCTGATGGCTAACGGTGAAATTAAAGACATCGCAAACGTCACGGCTAACTCTTACGTTATGTGCGCAGATGGTTCCGCTGCCCGCGTCATAAATGTCACACAGGGCTATCAGAAAATCTATAATATACAGCAAAAAACCAAACACAGAGCTTTTGAAGGTGAACCTGGTAGGTTAGATCCCAGGCGTAGAACAGTTTATCAGCGTCTTGCATTACAATGTACTGCAGGTCATAAATTGTCAGTCAGGGTCCCTACCAAACCACTGTTGGAAAAAAGTGGTAGAAATGCCACCAAATATAAAGTGAGATGGAGAAATCTGCAGCAATGTCAGA…	ALA	notfound	notfound	GLY	notfound	notfound	notfound	notfound	LEU	notfound	notfound	LEU	notfound	notfound	notfound	3	West Africa	CQE	Fermentation
CQF	no	> CQF_YDL227C_HO chromosome4:46271-48031 - 692 ATGCTTTCTGAAAACACGACTATTCTGATGGCTAACGGTGAAATTAAAGACATCGCAAACGTCACGGCTAACTCTTACGTTATGTGCGCAGATGGTTCCGCTGCCCGCGTCATAAATGTCACACAGGGCTATCAGAAAATCTATAATATACAGCAAAAAACCAAACACAGAGCTTTTGAAGGTGAACCTGGTAGGTTAGATCCCAGGCGTAGAACAGTTTATCAGCGTCTTGCATTACAATGTACTGCAGGTCATAAATTGTCAGTCAGGGTCCCTACCAAACCACTGTTGGAAAAAAGTGGTAGAAATGCCACCAAATATAAAGTGAGATGGAGAAATCTGCAGCAATGTC…	CQF_YDL227C_HO chromosome4:46271-48031 - 692ATGCTTTCTGAAAACACGACTATTCTGATGGCTAACGGTGAAATTAAAGACATCGCAAACGTCACGGCTAACTCTTACGTTATGTGCGCAGATGGTTCCGCTGCCCGCGTCATAAATGTCACACAGGGCTATCAGAAAATCTATAATATACAGCAAAAAACCAAACACAGAGCTTTTGAAGGTGAACCTGGTAGGTTAGATCCCAGGCGTAGAACAGTTTATCAGCGTCTTGCATTACAATGTACTGCAGGTCATAAATTGTCAGTCAGGGTCCCTACCAAACCACTGTTGGAAAAAAGTGGTAGAAATGCCACCAAATATAAAGTGAGATGGAGAAATCTGCAGCAATGTCAGA…	ALA	notfound	notfound	GLY	notfound	notfound	notfound	notfound	LEU	notfound	notfound	LEU	notfound	notfound	notfound	3	West Africa	CQF	Fermentation
CQG	no	> CQG_YDL227C_HO chromosome4:46271-48031 - 692 ATGCTTTCTGAAAACACGACTATTCTGATGGCTAACGGTGAAATTAAAGACATCGCAAACGTCACGGCTAACTCTTACGTTATGTGCGCAGATGGTTCCGCTGCCCGCGTCATAAATGTCACACAGGGCTATCAGAAAATCTATAATATACAGCAAAAAACCAAACACAGAGCTTTTGAAGGTGAACCTGGTAGGTTAGATCCCAGGCGTAGAACAGTTTATCAGCGTCTTGCATTACAATGTACTGCAGGTCATAAATTGTCAGTCAGGGTCCCTACCAAACCACTGTTGGAAAAAAGTGGTAGAAATGCCACCAAATATAAAGTGAGATGGAGAAATCTGCAGCAATGTC…	CQG_YDL227C_HO chromosome4:46271-48031 - 692ATGCTTTCTGAAAACACGACTATTCTGATGGCTAACGGTGAAATTAAAGACATCGCAAACGTCACGGCTAACTCTTACGTTATGTGCGCAGATGGTTCCGCTGCCCGCGTCATAAATGTCACACAGGGCTATCAGAAAATCTATAATATACAGCAAAAAACCAAACACAGAGCTTTTGAAGGTGAACCTGGTAGGTTAGATCCCAGGCGTAGAACAGTTTATCAGCGTCTTGCATTACAATGTACTGCAGGTCATAAATTGTCAGTCAGGGTCCCTACCAAACCACTGTTGGAAAAAAGTGGTAGAAATGCCACCAAATATAAAGTGAGATGGAGAAATCTGCAGCAATGTCAGA…	ALA	notfound	notfound	GLY	notfound	notfound	notfound	notfound	LEU	notfound	notfound	LEU	notfound	notfound	notfound	3	West Africa	CQG	Fermentation
CQH	no	> CQH_YDL227C_HO chromosome4:46271-48031 - 692 ATGCTTTCTGAAAACACGACTATTCTGATGGCTAACGGTGAAATTAAAGACATCGCAAACGTCACGGCTAACTCTTACGTTATGTGCGCAGATGGTTCCGCTGCCCGCGTCATAAATGTCACACAGGGCTATCAGAAAATCTATAATATACAGCAAAAAACCAAACACAGAGCTTTTGAAGGTGAACCTGGTAGGTTAGATCCCAGGCGTAGAACAGTTTATCAGCGTCTTGCATTACAATGTACTGCAGGTCATAAATTGTCAGTCAGGGTCCCTACCAAACCACTGTTGGAAAAAAGTGGTAGAAATGCCACCAAATATAAAGTGAGATGGAGAAATCTGCAGCAATGTC…	CQH_YDL227C_HO chromosome4:46271-48031 - 692ATGCTTTCTGAAAACACGACTATTCTGATGGCTAACGGTGAAATTAAAGACATCGCAAACGTCACGGCTAACTCTTACGTTATGTGCGCAGATGGTTCCGCTGCCCGCGTCATAAATGTCACACAGGGCTATCAGAAAATCTATAATATACAGCAAAAAACCAAACACAGAGCTTTTGAAGGTGAACCTGGTAGGTTAGATCCCAGGCGTAGAACAGTTTATCAGCGTCTTGCATTACAATGTACTGCAGGTCATAAATTGTCAGTCAGGGTCCCTACCAAACCACTGTTGGAAAAAAGTGGTAGAAATGCCACCAAATATAAAGTGAGATGGAGAAATCTGCAGCAATGTCAGA…	ALA	notfound	notfound	GLY	notfound	notfound	notfound	notfound	LEU	notfound	notfound	LEU	notfound	notfound	notfound	3	West Africa	CQH	Fermentation
CQI	no	> CQI_YDL227C_HO chromosome4:46271-48031 - 692 ATGCTTTCTGAAAACACGACTATTCTGATGGCTAACGGTGAAATTAAAGACATCGCAAACGTCACGGCTAACTCTTACGTTATGTGCGCAGATGGTTCCGCTGCCCGCGTCATAAATGTCACACAGGGCTATCAGAAAATCTATAATATACAGCAAAAAACCAAACACAGAGCTTTTGAAGGTGAACCTGGTAGGTTAGATCCCAGGCGTAGAACAGTTTATCAGCGTCTTGCATTACAATGTACTGCAGGTCATAAATTGTCAGTCAGGGTCCCTACCAAACCACTGTTGGAAAAAAGTGGTAGAAATGCCACCAAATATAAAGTGAGATGGAGAAATCTGCAGCAATGTC…	CQI_YDL227C_HO chromosome4:46271-48031 - 692ATGCTTTCTGAAAACACGACTATTCTGATGGCTAACGGTGAAATTAAAGACATCGCAAACGTCACGGCTAACTCTTACGTTATGTGCGCAGATGGTTCCGCTGCCCGCGTCATAAATGTCACACAGGGCTATCAGAAAATCTATAATATACAGCAAAAAACCAAACACAGAGCTTTTGAAGGTGAACCTGGTAGGTTAGATCCCAGGCGTAGAACAGTTTATCAGCGTCTTGCATTACAATGTACTGCAGGTCATAAATTGTCAGTCAGGGTCCCTACCAAACCACTGTTGGAAAAAAGTGGTAGAAATGCCACCAAATATAAAGTGAGATGGAGAAATCTGCAGCAATGTCAGA…	ALA	notfound	notfound	GLY	notfound	notfound	notfound	notfound	LEU	notfound	notfound	LEU	notfound	notfound	notfound	3	West Africa	CQI	Fermentation
CQK	no	> CQK_YDL227C_HO chromosome4:46271-48031 - 692 ATGCTTTCTGAAAACACGACTATTCTGATGGCTAACGGTGAAATTAAAGACATCGCAAACGTCACGGCTAACTCTTACGTTATGTGCGCAGATGGTTCCGCTGCCCGCGTCATAAATGTCACACAGGGCTATCAGAAAATCTATAATATACAGCAAAAAACCAAACACAGAGCTTTTGAAGGTGAACCTGGTAGGTTAGATCCCAGGCGTAGAACAGTTTATCAGCGTCTTGCATTACAATGTACTGCAGGTCATAAATTGTCAGTCAGGGTCCCTACCAAACCACTGTTGGAAAAAAGTGGTAGAAATGCCACCAAATATAAAGTGAGATGGAGAAATCTGCAGCAATGTC…	CQK_YDL227C_HO chromosome4:46271-48031 - 692ATGCTTTCTGAAAACACGACTATTCTGATGGCTAACGGTGAAATTAAAGACATCGCAAACGTCACGGCTAACTCTTACGTTATGTGCGCAGATGGTTCCGCTGCCCGCGTCATAAATGTCACACAGGGCTATCAGAAAATCTATAATATACAGCAAAAAACCAAACACAGAGCTTTTGAAGGTGAACCTGGTAGGTTAGATCCCAGGCGTAGAACAGTTTATCAGCGTCTTGCATTACAATGTACTGCAGGTCATAAATTGTCAGTCAGGGTCCCTACCAAACCACTGTTGGAAAAAAGTGGTAGAAATGCCACCAAATATAAAGTGAGATGGAGAAATCTGCAGCAATGTCAGA…	ALA	notfound	notfound	GLY	notfound	notfound	notfound	notfound	LEU	notfound	notfound	LEU	notfound	notfound	notfound	3	West Africa	CQK	Fermentation
CQL	no	> CQL_YDL227C_HO chromosome4:46271-48031 - 692 ATGCTTTCTGAAAACACGACTATTCTGATGGCTAACGGTGAAATTAAAGACATCGCAAACGTCACGGCTAACTCTTACGTTATGTGCGCAGATGGTTCCGCTGCCCGCGTCATAAATGTCACACAGGGCTATCAGAAAATCTATAATATACAGCAAAAAACCAAACACAGAGCTTTTGAAGGTGAACCTGGTAGGTTAGATCCCAGGCGTAGAACAGTTTATCAGCGTCTTGCATTACAATGTACTGCAGGTCATAAATTGTCAGTCAGGGTCCCTACCAAACCACTGTTGGAAAAAAGTGGTAGAAATGCCACCAAATATAAAGTGAGATGGAGAAATCTGCAGCAATGTC…	CQL_YDL227C_HO chromosome4:46271-48031 - 692ATGCTTTCTGAAAACACGACTATTCTGATGGCTAACGGTGAAATTAAAGACATCGCAAACGTCACGGCTAACTCTTACGTTATGTGCGCAGATGGTTCCGCTGCCCGCGTCATAAATGTCACACAGGGCTATCAGAAAATCTATAATATACAGCAAAAAACCAAACACAGAGCTTTTGAAGGTGAACCTGGTAGGTTAGATCCCAGGCGTAGAACAGTTTATCAGCGTCTTGCATTACAATGTACTGCAGGTCATAAATTGTCAGTCAGGGTCCCTACCAAACCACTGTTGGAAAAAAGTGGTAGAAATGCCACCAAATATAAAGTGAGATGGAGAAATCTGCAGCAATGTCAGA…	ALA	notfound	notfound	GLY	notfound	notfound	notfound	notfound	LEU	notfound	notfound	LEU	notfound	notfound	notfound	3	West Africa	CQL	Fermentation
CQM	no	> CQM_YDL227C_HO chromosome4:46271-48031 - 692 ATGCTTTCTGAAAACACGACTATTCTGATGGCTAACGGTGAAATTAAAGACATCGCAAACGTCACGGCTAACTCTTACGTTATGTGCGCAGATGGTTCCGCTGCCCGCGTCATAAATGTCACACAGGGCTATCAGAAAATCTATAATATACAGCAAAAAACCAAACACAGAGCTTTTGAAGGTGAACCTGGTAGGTTAGATCCCAGGCGTAGAACAGTTTATCAGCGTCTTGCATTACAATGTACTGCAGGTCATAAATTGTCAGTCAGGGTCCCTACCAAACCACTGTTGGAAAAAAGTGGTAGAAATGCCACCAAATATAAAGTGAGATGGAGAAATCTGCAGCAATGTC…	CQM_YDL227C_HO chromosome4:46271-48031 - 692ATGCTTTCTGAAAACACGACTATTCTGATGGCTAACGGTGAAATTAAAGACATCGCAAACGTCACGGCTAACTCTTACGTTATGTGCGCAGATGGTTCCGCTGCCCGCGTCATAAATGTCACACAGGGCTATCAGAAAATCTATAATATACAGCAAAAAACCAAACACAGAGCTTTTGAAGGTGAACCTGGTAGGTTAGATCCCAGGCGTAGAACAGTTTATCAGCGTCTTGCATTACAATGTACTGCAGGTCATAAATTGTCAGTCAGGGTCCCTACCAAACCACTGTTGGAAAAAAGTGGTAGAAATGCCACCAAATATAAAGTGAGATGGAGAAATCTGCAGCAATGTCAGA…	ALA	notfound	notfound	GLY	notfound	notfound	notfound	notfound	LEU	notfound	notfound	LEU	notfound	notfound	notfound	3	West Africa	CQM	Fermentation
CQN	no	> CQN_YDL227C_HO chromosome4:46271-48031 - 692 ATGCTTTCTGAAAACACGACTATTCTGATGGCTAACGGTGAAATTAAAGACATCGCAAACGTCACGGCTAACTCTTACGTTATGTGCGCAGATGGTTCCGCTGCCCGCGTCATAAATGTCACACAGGGCTATCAGAAAATCTATAATATACAGCAAAAAACCAAACACAGAGCTTTTGAAGGTGAACCTGGTAGGTTAGATCCCAGGCGTAGAACAGTTTATCAGCGTCTTGCATTACAATGTACTGCAGGTCATAAATTGTCAGTCAGGGTCCCTACCAAACCACTGTTGGAAAAAAGTGGTAGAAATGCCACCAAATATAAAGTGAGATGGAGAAATCTGCAGCAATGTC…	CQN_YDL227C_HO chromosome4:46271-48031 - 692ATGCTTTCTGAAAACACGACTATTCTGATGGCTAACGGTGAAATTAAAGACATCGCAAACGTCACGGCTAACTCTTACGTTATGTGCGCAGATGGTTCCGCTGCCCGCGTCATAAATGTCACACAGGGCTATCAGAAAATCTATAATATACAGCAAAAAACCAAACACAGAGCTTTTGAAGGTGAACCTGGTAGGTTAGATCCCAGGCGTAGAACAGTTTATCAGCGTCTTGCATTACAATGTACTGCAGGTCATAAATTGTCAGTCAGGGTCCCTACCAAACCACTGTTGGAAAAAAGTGGTAGAAATGCCACCAAATATAAAGTGAGATGGAGAAATCTGCAGCAATGTCAGA…	ALA	notfound	notfound	GLY	notfound	notfound	notfound	notfound	LEU	notfound	notfound	LEU	notfound	notfound	notfound	3	West Africa	CQN	Fermentation
CQP	no	> CQP_YDL227C_HO chromosome4:46271-48031 - 692 ATGCTTTCTGAAAACACGACTATTCTGATGGCTAACGGTGAAATTAAAGACATCGCAAACGTCACGGCTAACTCTTACGTTATGTGCGCAGATGGTTCCGCTGCCCGCGTCATAAATGTCACACAGGGCTATCAGAAAATCTATAATATACAGCAAAAAACCAAACACAGAGCTTTTGAAGGTGAACCTGGTAGGTTAGATCCCAGGCGTAGAACAGTTTATCAGCGTCTTGCATTACAATGTACTGCAGGTCATAAATTGTCAGTCAGGGTCCCTACCAAACCACTGTTGGAAAAAAGTGGTAGAAATGCCACCAAATATAAAGTGAGATGGAGAAATCTGCAGCAATGTC…	CQP_YDL227C_HO chromosome4:46271-48031 - 692ATGCTTTCTGAAAACACGACTATTCTGATGGCTAACGGTGAAATTAAAGACATCGCAAACGTCACGGCTAACTCTTACGTTATGTGCGCAGATGGTTCCGCTGCCCGCGTCATAAATGTCACACAGGGCTATCAGAAAATCTATAATATACAGCAAAAAACCAAACACAGAGCTTTTGAAGGTGAACCTGGTAGGTTAGATCCCAGGCGTAGAACAGTTTATCAGCGTCTTGCATTACAATGTACTGCAGGTCATAAATTGTCAGTCAGGGTCCCTACCAAACCACTGTTGGAAAAAAGTGGTAGAAATGCCACCAAATATAAAGTGAGATGGAGAAATCTGCAGCAATGTCAGA…	ALA	notfound	notfound	GLY	notfound	notfound	notfound	notfound	LEU	notfound	notfound	LEU	notfound	notfound	notfound	3	West Africa	CQP	Fermentation
SACE_YDD	no	> SACE_YDD_YDL227C_HO chromosome4:46271-48031 - 692 ATGCTTTCTGAAAACACGACTATTCTGATGGCTAACGGTGAAATTAAAGACATCGCAAACGTCACGGCTAACTCTTACGTTATGTGCGCAGATGGCTCCGCTGCCCGCGTCATAAATGTCACACAGGGCTATCAGAAAATCTATAATATACAGCAAAAAACCAAACACAGAGCTTTTGAAGGTGAACCTGGTAGGTTAGATCCCAGGCGTAGAACAGTTTATCAGCGTCTTGCATTACAATGTACTGCAGGTCATAAATTGTCAGTCAGGGTCCCTACCAAACCACTGTTGGAAAAAAGTGGTAGAAATGCCACCAAATATAAAGTGAGATGGAGAAATCTGCAGCA…	SACE_YDD_YDL227C_HO chromosome4:46271-48031 - 692ATGCTTTCTGAAAACACGACTATTCTGATGGCTAACGGTGAAATTAAAGACATCGCAAACGTCACGGCTAACTCTTACGTTATGTGCGCAGATGGCTCCGCTGCCCGCGTCATAAATGTCACACAGGGCTATCAGAAAATCTATAATATACAGCAAAAAACCAAACACAGAGCTTTTGAAGGTGAACCTGGTAGGTTAGATCCCAGGCGTAGAACAGTTTATCAGCGTCTTGCATTACAATGTACTGCAGGTCATAAATTGTCAGTCAGGGTCCCTACCAAACCACTGTTGGAAAAAAGTGGTAGAAATGCCACCAAATATAAAGTGAGATGGAGAAATCTGCAGCAATG…	ALA	notfound	notfound	GLY	notfound	notfound	notfound	notfound	LEU	notfound	notfound	LEU	notfound	notfound	notfound	3	Missouri, USA	SACE_YDD	Fermentation
AKS	no	> AKS_YDL227C_HO chromosome4:46271-48031 - 692 ATGCTTTCTGAAAACACGACTATTCTGATGGCTAACGGTGAAATTAAAGACATCGCAAACGTCACGGCTAACTCTTACGTTATGTGCGCAGATGGCTCCGCTGCCCGCGTCATAAATGTCACACAGGGCTATCAGAAAATCTATAATATACAGCAAAAAACCAAACACAGAGCTTTTGAAGGTGAACCTGGTAGGTTAGATCCCAGGCGTAGAACAGTTTATCAGCGTCTTGCATTACAATGTACTGCAGGTCATAAATTGTCAGTCAGGGTCCCTACCAAACCACTGTTGGAAAAAAGTGGTAGAAATGCCACCAAATATAAAGTGAGATGGAGAAATCTGCAGCAATGTC…	AKS_YDL227C_HO chromosome4:46271-48031 - 692ATGCTTTCTGAAAACACGACTATTCTGATGGCTAACGGTGAAATTAAAGACATCGCAAACGTCACGGCTAACTCTTACGTTATGTGCGCAGATGGCTCCGCTGCCCGCGTCATAAATGTCACACAGGGCTATCAGAAAATCTATAATATACAGCAAAAAACCAAACACAGAGCTTTTGAAGGTGAACCTGGTAGGTTAGATCCCAGGCGTAGAACAGTTTATCAGCGTCTTGCATTACAATGTACTGCAGGTCATAAATTGTCAGTCAGGGTCCCTACCAAACCACTGTTGGAAAAAAGTGGTAGAAATGCCACCAAATATAAAGTGAGATGGAGAAATCTGCAGCAATGTCAGA…	ALA	notfound	notfound	GLY	notfound	notfound	notfound	notfound	LEU	notfound	notfound	LEU	notfound	notfound	notfound	3	Imbabura, Ecuador	AKS	Flower
CCC	no	> CCC_YDL227C_HO chromosome4:46271-48031 - 692 ATGCTTTCTGAAAACACGACTATTCTGATGGCTAACGGTGAAATTAAAGACATCGCAAACGTCACGGCTAACTCTTACGTTATGTGCGCAGATGGCTCCGCTGCCCGCGTCATAAATGTCACACAGGGCTATCAGAAAATCTATAATATACAGCAAAAAACCAAACACAGAGCTTTTGAAGGTGAACCTGGTAGGTTAGATCCCAGGCGTAGAACAGTTTATCAGCGTCTTGCATTACAATGTACTGCAGGTCATAAATTGTCAGTCAGGGTCCCTACCAAACCATTGTTGGAAAAAAGTGGTAGAAATGCCACCAAATATAAAGTGAGATGGAGAAATCTGCAGCAATGTC…	CCC_YDL227C_HO chromosome4:46271-48031 - 692ATGCTTTCTGAAAACACGACTATTCTGATGGCTAACGGTGAAATTAAAGACATCGCAAACGTCACGGCTAACTCTTACGTTATGTGCGCAGATGGCTCCGCTGCCCGCGTCATAAATGTCACACAGGGCTATCAGAAAATCTATAATATACAGCAAAAAACCAAACACAGAGCTTTTGAAGGTGAACCTGGTAGGTTAGATCCCAGGCGTAGAACAGTTTATCAGCGTCTTGCATTACAATGTACTGCAGGTCATAAATTGTCAGTCAGGGTCCCTACCAAACCATTGTTGGAAAAAAGTGGTAGAAATGCCACCAAATATAAAGTGAGATGGAGAAATCTGCAGCAATGTCAGA…	ALA	notfound	notfound	GLY	notfound	notfound	notfound	notfound	LEU	notfound	notfound	LEU	notfound	notfound	notfound	3	Yasuni, Orellana	CCC	Flower
CCD	no	> CCD_YDL227C_HO chromosome4:46271-48031 - 692 ATGCTTTCTGAAAACACGACTATTCTGATGGCTAACGGTGAAATTAAAGACATCGCAAACGTCACGGCTAACTCTTACGTTATGTGCGCAGATGGCTCCGCTGCCCGCGTCATAAATGTCACACAGGGCTATCAGAAAATCTATAATATACAGCAAAAAACCAAACACAGAGCTTTTGAAGGTGAACCTGGTAGGTTAGATCCCAGGCGTAGAACAGTTTATCAGCGTCTTGCATTACAATGTACTGCAGGTCATAAATTGTCAGTCAGGGTCCCTACCAAACCATTGTTGGAAAAAAGTGGTAGAAATGCCACCAAATATAAAGTGAGATGGAGAAATCTGCAGCAATGTC…	CCD_YDL227C_HO chromosome4:46271-48031 - 692ATGCTTTCTGAAAACACGACTATTCTGATGGCTAACGGTGAAATTAAAGACATCGCAAACGTCACGGCTAACTCTTACGTTATGTGCGCAGATGGCTCCGCTGCCCGCGTCATAAATGTCACACAGGGCTATCAGAAAATCTATAATATACAGCAAAAAACCAAACACAGAGCTTTTGAAGGTGAACCTGGTAGGTTAGATCCCAGGCGTAGAACAGTTTATCAGCGTCTTGCATTACAATGTACTGCAGGTCATAAATTGTCAGTCAGGGTCCCTACCAAACCATTGTTGGAAAAAAGTGGTAGAAATGCCACCAAATATAAAGTGAGATGGAGAAATCTGCAGCAATGTCAGA…	ALA	notfound	notfound	GLY	notfound	notfound	notfound	notfound	LEU	notfound	notfound	LEU	notfound	notfound	notfound	3	Yasuni, Orellana	CCD	Flower
CCE	no	> CCE_YDL227C_HO chromosome4:46271-48031 - 692 ATGCTTTCTGAAAACACGACTATTCTGATGGCTAACGGTGAAATTAAAGACATCGCAAACGTCACGGCTAACTCTTACGTTATGTGCGCAGATGGCTCCGCTGCCCGCGTCATAAATGTCACACAGGGCTATCAGAAAATCTATAATATACAGCAAAAAACCAAACACAGAGCTTTTGAAGGTGAACCTGGTAGGTTAGATCCCAGGCGTAGAACAGTTTATCAGCGTCTTGCATTACAATGTACTGCAGGTCATAAATTGTCAGTCAGGGTCCCTACCAAACCATTGTTGGAAAAAAGTGGTAGAAATGCCACCAAATATAAAGTGAGATGGAGAAATCTGCAGCAATGTC…	CCE_YDL227C_HO chromosome4:46271-48031 - 692ATGCTTTCTGAAAACACGACTATTCTGATGGCTAACGGTGAAATTAAAGACATCGCAAACGTCACGGCTAACTCTTACGTTATGTGCGCAGATGGCTCCGCTGCCCGCGTCATAAATGTCACACAGGGCTATCAGAAAATCTATAATATACAGCAAAAAACCAAACACAGAGCTTTTGAAGGTGAACCTGGTAGGTTAGATCCCAGGCGTAGAACAGTTTATCAGCGTCTTGCATTACAATGTACTGCAGGTCATAAATTGTCAGTCAGGGTCCCTACCAAACCATTGTTGGAAAAAAGTGGTAGAAATGCCACCAAATATAAAGTGAGATGGAGAAATCTGCAGCAATGTCAGA…	ALA	notfound	notfound	GLY	notfound	notfound	notfound	notfound	LEU	notfound	notfound	LEU	notfound	notfound	notfound	3	Yasuni, Orellana	CCE	Flower
AFS	no	> AFS_YDL227C_HO chromosome4:46271-48031 - 692 ATGCTTTCTGAAAACACGACTATTCTGATGGCTAACGGTGAAATTAAAGACATCGCAAACGTCACGGCTAACTCTTACGTTATGTGCGCAGATGGCTCCGCTGCCCGCGTCATAAATGTCACACAGGGCTATCAGAAAATCTATAATATACAGCAAAAAACCAAACACAGAGCTTTTGAAGGTGAACCTGGTAGGTTAGATCCCAGGCATAGAACAGTTTATCAGCGTCTTGCATTACAATGTACTGCAGGTCATAAATTGTCAGTCAGGGTCCCTACCAAACCACTGTTGGAAAAAAGTGGTAGAAATGCCACCAAATATAAAGTGAGATGGAGAAATCTGCAGCAATGTC…	AFS_YDL227C_HO chromosome4:46271-48031 - 692ATGCTTTCTGAAAACACGACTATTCTGATGGCTAACGGTGAAATTAAAGACATCGCAAACGTCACGGCTAACTCTTACGTTATGTGCGCAGATGGCTCCGCTGCCCGCGTCATAAATGTCACACAGGGCTATCAGAAAATCTATAATATACAGCAAAAAACCAAACACAGAGCTTTTGAAGGTGAACCTGGTAGGTTAGATCCCAGGCATAGAACAGTTTATCAGCGTCTTGCATTACAATGTACTGCAGGTCATAAATTGTCAGTCAGGGTCCCTACCAAACCACTGTTGGAAAAAAGTGGTAGAAATGCCACCAAATATAAAGTGAGATGGAGAAATCTGCAGCAATGTCAGA…	ALA	notfound	notfound	GLY	notfound	notfound	notfound	notfound	LEU	notfound	notfound	LEU	notfound	notfound	notfound	3	NA	AFS	Fruit
ALG	no	> ALG_YDL227C_HO chromosome4:46271-48031 - 692 ATGCTTTCTGAAAACACGACTATTCTGATGGCTAACGGTGAAATTAAAGACATCGCAAACGTCACGGCTAACTCTTACGTTATGTGCGCAGATGGCTCCGCTGCCCGCGTCATAAATGTCACACAGGGCTATCAGAAAATCTATAATATACAGCAAAAAACCAAACACAGAGCTTTTGAAGGTGAACCTGGTAGGTTAGATCCCAGGCGTAGAACAGTTTATCAGCGTCTTGCATTACAATGTACTGCAGGTCATAAATTGTCAGTCAGGGTCCCTACCAAACCACTGTTGGAAAAAAGTGGTAGAAATGCCACCAAATATAAAGTGAGATGGAGAAATCTGCAGCAATGTC…	ALG_YDL227C_HO chromosome4:46271-48031 - 692ATGCTTTCTGAAAACACGACTATTCTGATGGCTAACGGTGAAATTAAAGACATCGCAAACGTCACGGCTAACTCTTACGTTATGTGCGCAGATGGCTCCGCTGCCCGCGTCATAAATGTCACACAGGGCTATCAGAAAATCTATAATATACAGCAAAAAACCAAACACAGAGCTTTTGAAGGTGAACCTGGTAGGTTAGATCCCAGGCGTAGAACAGTTTATCAGCGTCTTGCATTACAATGTACTGCAGGTCATAAATTGTCAGTCAGGGTCCCTACCAAACCACTGTTGGAAAAAAGTGGTAGAAATGCCACCAAATATAAAGTGAGATGGAGAAATCTGCAGCAATGTCAGA…	ALA	notfound	notfound	GLY	notfound	notfound	notfound	notfound	LEU	notfound	notfound	LEU	notfound	notfound	notfound	3	Sucumbios, Ecuador	ALG	Fruit
AMD	no	> AMD_YDL227C_HO chromosome4:46271-48031 - 692 ATGCTTTCTGAAAACACGACTATTCTGATGGCTAACGGTGAAATTAAAGACATCGCAAACGTCACGGCTAACTCTTACGTTATGTGCGCAGATGGCTCCGCTGCCCGCGTCATAAATGTCACACAGGGCTATCAGAAAATCTATAATATACAGCAAAAAACCAAACACAGAGCTTTTGAAGGTGAACCTGGTAGGTTAGATCCCAGGCGTAGAACAGTTTATCAGCGTCTTGCATTACAATGTACTGCAGGTCATAAATTGTCAGTCAGGGTCCCTACCAAACCACTGTTGGAAAAAAGTGGTAGAAATGCCACCAAATATAAAGTGAGATGGAGAAATCTGCAGCAATGTC…	AMD_YDL227C_HO chromosome4:46271-48031 - 692ATGCTTTCTGAAAACACGACTATTCTGATGGCTAACGGTGAAATTAAAGACATCGCAAACGTCACGGCTAACTCTTACGTTATGTGCGCAGATGGCTCCGCTGCCCGCGTCATAAATGTCACACAGGGCTATCAGAAAATCTATAATATACAGCAAAAAACCAAACACAGAGCTTTTGAAGGTGAACCTGGTAGGTTAGATCCCAGGCGTAGAACAGTTTATCAGCGTCTTGCATTACAATGTACTGCAGGTCATAAATTGTCAGTCAGGGTCCCTACCAAACCACTGTTGGAAAAAAGTGGTAGAAATGCCACCAAATATAAAGTGAGATGGAGAAATCTGCAGCAATGTCAGA…	ALA	notfound	notfound	GLY	notfound	notfound	notfound	notfound	LEU	notfound	notfound	LEU	notfound	notfound	notfound	3	Dongpu, Sinyi Township, Nantou, Taiwan	AMD	Fruit
AMF	no	> AMF_YDL227C_HO chromosome4:46271-48031 - 692 ATGCTTTCTGAAAACACGACTATTCTGATGGCTAACGGTGAAATTAAAGACATCGCAAACGTCACGGCTAACTCTTACGTTATGTGCGCAGATGGCTCCGCTGCCCGCGTCATAAATGTCACACAGGGCTATCAGAAAATCTATAATATACAGCAAAAAACCAAACACAGAGCTTTTGAAGGTGAACCTGGTAGGTTAGATCCCAGGCGTAGAACAGTTTATCAGCGTCTTGCATTACAATGTACTGCAGGTCATAAATTGTCAGTCAGGGTCCCTACCAAACCACTGTTGGAAAAAAGTGGTAGAAATGCCACCAAATATAAAGTGAGATGGAGAAATCTGCAGCAATGTC…	AMF_YDL227C_HO chromosome4:46271-48031 - 692ATGCTTTCTGAAAACACGACTATTCTGATGGCTAACGGTGAAATTAAAGACATCGCAAACGTCACGGCTAACTCTTACGTTATGTGCGCAGATGGCTCCGCTGCCCGCGTCATAAATGTCACACAGGGCTATCAGAAAATCTATAATATACAGCAAAAAACCAAACACAGAGCTTTTGAAGGTGAACCTGGTAGGTTAGATCCCAGGCGTAGAACAGTTTATCAGCGTCTTGCATTACAATGTACTGCAGGTCATAAATTGTCAGTCAGGGTCCCTACCAAACCACTGTTGGAAAAAAGTGGTAGAAATGCCACCAAATATAAAGTGAGATGGAGAAATCTGCAGCAATGTCAGA…	ALA	notfound	notfound	GLY	notfound	notfound	notfound	notfound	LEU	notfound	notfound	LEU	notfound	notfound	notfound	3	Dongpu, Sinyi Township, Nantou, Taiwan	AMF	Fruit
AMP	no	> AMP_YDL227C_HO chromosome4:46271-48031 - 692 ATGCTTTCTGAAAACACGACTATTCTGATGGCTAACGGTGAAATTAAAGACATCGCAAACGTCACGGCTAACTCTTACGTTATGTGCGCAGATGGCTCCGCTGCCCGCGTCATAAATGTCACACAGGGCTATCAGAAAATCTATAATATACAGCAAAAAACCAAACACAGAGCTTTTGAAGGTGAACCTGGTAGGTTAGATCCCAGGCGTAGAACAGTTTATCAGCGTCTTGCATTACAATGTACTGCAGGTCATAAATTGTCAGTCAGGGTCCCTACCAAACCACTGTTGGAAAAAAGTGGTAGAAATGCCACCAAATATAAAGTGAGATGGAGAAATCTGCAGCAATGTC…	AMP_YDL227C_HO chromosome4:46271-48031 - 692ATGCTTTCTGAAAACACGACTATTCTGATGGCTAACGGTGAAATTAAAGACATCGCAAACGTCACGGCTAACTCTTACGTTATGTGCGCAGATGGCTCCGCTGCCCGCGTCATAAATGTCACACAGGGCTATCAGAAAATCTATAATATACAGCAAAAAACCAAACACAGAGCTTTTGAAGGTGAACCTGGTAGGTTAGATCCCAGGCGTAGAACAGTTTATCAGCGTCTTGCATTACAATGTACTGCAGGTCATAAATTGTCAGTCAGGGTCCCTACCAAACCACTGTTGGAAAAAAGTGGTAGAAATGCCACCAAATATAAAGTGAGATGGAGAAATCTGCAGCAATGTCAGA…	ALA	notfound	notfound	GLY	notfound	notfound	notfound	notfound	LEU	notfound	notfound	LEU	notfound	notfound	notfound	3	Taian, Miaoli, Taiwan	AMP	Fruit
BAI	no	> BAI_YDL227C_HO chromosome4:46271-48031 - 692 ATGCTTTCTGAAAACACGACTATTCTGATGGCTAACGGTGAAATTAAAGACATCGCAAACGTCACGGCTAACTCTTACGTTATGTGCGCAGATGGCTCCGCTGCCCGCGTCATAAATGTCACACAGGGCTATCAGAAAATCTATAATATACAGCAAAAAACCAAACACAGAGCTTTTGAAGGTGAACCTGGTAGGTTAGATCCCAGGCGTAGAACAGTTTATCAGCGTCTTGCATTACAATGTACTGCAGGTCATAAATTGTCAGTCAGGGTCCCTACCAAACCACTGTTGGAAAAAAGTGGTAGAAATGCCACCAAATATAAAGTGAGATGGAGAAATCTGCAGCAATGTC…	BAI_YDL227C_HO chromosome4:46271-48031 - 692ATGCTTTCTGAAAACACGACTATTCTGATGGCTAACGGTGAAATTAAAGACATCGCAAACGTCACGGCTAACTCTTACGTTATGTGCGCAGATGGCTCCGCTGCCCGCGTCATAAATGTCACACAGGGCTATCAGAAAATCTATAATATACAGCAAAAAACCAAACACAGAGCTTTTGAAGGTGAACCTGGTAGGTTAGATCCCAGGCGTAGAACAGTTTATCAGCGTCTTGCATTACAATGTACTGCAGGTCATAAATTGTCAGTCAGGGTCCCTACCAAACCACTGTTGGAAAAAAGTGGTAGAAATGCCACCAAATATAAAGTGAGATGGAGAAATCTGCAGCAATGTCAGA…	ALA	notfound	notfound	GLY	notfound	notfound	notfound	notfound	LEU	notfound	notfound	LEU	notfound	notfound	notfound	3	Changping, Beijing, China	BAI	Fruit
BNB	no	> BNB_YDL227C_HO chromosome4:46271-48031 - 692 ATGCTTTCTGAAAACACGACTATTCTGATGGCTAACGGTGAAATTAAAGACATCGCAAACGTCACGGCTAACTCTTACGTTATGTGCGCAGATGGCTCCGCTGCCCGCGTCATAAATGTCACACAGGGCTATCAGAAAATCTATAATATACAACAAAAAACCAAACACAGAGCTTTTGAAGGTGAACCTGGTAGGTTAGATCCCAGGCGTAGAACAGTTTATCAGCGTCTTGCATTACAATGTACTGCAGGTCATAAATTGTCAGTCAGGGTCCCTACCAAACCACTGTTGGAAAAAAGTGGTAGAAATGCCACCAAATATAAAGTGAGATGGAGAAATCTGCAGCAATGTC…	BNB_YDL227C_HO chromosome4:46271-48031 - 692ATGCTTTCTGAAAACACGACTATTCTGATGGCTAACGGTGAAATTAAAGACATCGCAAACGTCACGGCTAACTCTTACGTTATGTGCGCAGATGGCTCCGCTGCCCGCGTCATAAATGTCACACAGGGCTATCAGAAAATCTATAATATACAACAAAAAACCAAACACAGAGCTTTTGAAGGTGAACCTGGTAGGTTAGATCCCAGGCGTAGAACAGTTTATCAGCGTCTTGCATTACAATGTACTGCAGGTCATAAATTGTCAGTCAGGGTCCCTACCAAACCACTGTTGGAAAAAAGTGGTAGAAATGCCACCAAATATAAAGTGAGATGGAGAAATCTGCAGCAATGTCAGA…	ALA	notfound	notfound	GLY	notfound	notfound	notfound	notfound	LEU	notfound	notfound	LEU	notfound	notfound	notfound	3	French Guiana	BNB	Fruit
BNC	no	> BNC_YDL227C_HO chromosome4:46271-48031 - 692 ATGCTTTCTGAAAACACGACTATTCTGATGGCTAACGGTGAAATTAAAGACATCGCAAACGTCACGGCTAACTCTTACGTTATGTGCGCAGATGGCTCCGCTGCCCGCGTCATAAATGTCACACAGGGCTATCAGAAAATCTATAATATACAGCAAAAAACCAAAAACAGAGCTTTTGAAGGTGAACCTGGTAGGTTAGATCCCAGGCGTAGAACAGTTTATCAGCGTCTTGCATTACAATGTACTGCAGGTCATAAATTGTCAGTCAGGGTCCCTACCAAACCACTGTTGGAAAAAAGTGGTAGAAATGCCACCAAATATAAAGTGAGATGGAGAAATCTGCAGCAATGTC…	BNC_YDL227C_HO chromosome4:46271-48031 - 692ATGCTTTCTGAAAACACGACTATTCTGATGGCTAACGGTGAAATTAAAGACATCGCAAACGTCACGGCTAACTCTTACGTTATGTGCGCAGATGGCTCCGCTGCCCGCGTCATAAATGTCACACAGGGCTATCAGAAAATCTATAATATACAGCAAAAAACCAAAAACAGAGCTTTTGAAGGTGAACCTGGTAGGTTAGATCCCAGGCGTAGAACAGTTTATCAGCGTCTTGCATTACAATGTACTGCAGGTCATAAATTGTCAGTCAGGGTCCCTACCAAACCACTGTTGGAAAAAAGTGGTAGAAATGCCACCAAATATAAAGTGAGATGGAGAAATCTGCAGCAATGTCAGA…	ALA	notfound	notfound	GLY	notfound	notfound	notfound	notfound	LEU	notfound	notfound	LEU	notfound	notfound	notfound	3	French Guiana	BNC	Fruit
BND	no	> BND_YDL227C_HO chromosome4:46271-48031 - 692 ATGCTTTCTGAAAACACGACTATTCTGATGGCTAACGGTGAAATTAAAGACATCGCAAACGTCACGGCTAACTCTTACGTTATGTGCGCAGATGGCTCCGCTGCCCGCGTCATAAATGTCACACAGGGCTATCAGAAAATCTATAATATACAACAAAAAACCAAACACAGAGCTTTTGAAGGTGAACCTGGTAGGTTAGATCCCAGGCGTAGAACAGTTTATCAGCGTCTTGCATTACAATGTACTGCAGGTCATAAATTGTCAGTCAGGGTCCCTACCAAACCACTGTTGGAAAAAAGTGGTAGAAATGCCACCAAATATAAAGTGAGATGGAGAAATCTGCAGCAATGTC…	BND_YDL227C_HO chromosome4:46271-48031 - 692ATGCTTTCTGAAAACACGACTATTCTGATGGCTAACGGTGAAATTAAAGACATCGCAAACGTCACGGCTAACTCTTACGTTATGTGCGCAGATGGCTCCGCTGCCCGCGTCATAAATGTCACACAGGGCTATCAGAAAATCTATAATATACAACAAAAAACCAAACACAGAGCTTTTGAAGGTGAACCTGGTAGGTTAGATCCCAGGCGTAGAACAGTTTATCAGCGTCTTGCATTACAATGTACTGCAGGTCATAAATTGTCAGTCAGGGTCCCTACCAAACCACTGTTGGAAAAAAGTGGTAGAAATGCCACCAAATATAAAGTGAGATGGAGAAATCTGCAGCAATGTCAGA…	ALA	notfound	notfound	GLY	notfound	notfound	notfound	notfound	LEU	notfound	notfound	LEU	notfound	notfound	notfound	3	French Guiana	BND	Fruit
CCG	no	> CCG_YDL227C_HO chromosome4:46271-48031 - 692 ATGCTTTCTGAAAACACGACTATTCTGATGGCTAACGGTGAAATTAAAGACATCGCAAACGTCACGGCTAACTCTTACGTTATGTGCGCAGATGGCTCCGCTGCCCGCGTCATAAATGTCACACAGGGCTATCAGAAAATCTATAATATACAGCAAAAAACCAAACACAGAGCTTTTGAAGGTGAACCTGGTAGGTTAGATCCCAGGCGTAGAACAGTTTATCAGCGTCTTGCATTACAATGTACTGCAGGTCATAAATTGTCAGTCAGGGTCCCTACCAAACCATTGTTGGAAAAAAGTGGTAGAAATGCCACCAAATATAAAGTGAGATGGAGAAATCTGCAGCAATGTC…	CCG_YDL227C_HO chromosome4:46271-48031 - 692ATGCTTTCTGAAAACACGACTATTCTGATGGCTAACGGTGAAATTAAAGACATCGCAAACGTCACGGCTAACTCTTACGTTATGTGCGCAGATGGCTCCGCTGCCCGCGTCATAAATGTCACACAGGGCTATCAGAAAATCTATAATATACAGCAAAAAACCAAACACAGAGCTTTTGAAGGTGAACCTGGTAGGTTAGATCCCAGGCGTAGAACAGTTTATCAGCGTCTTGCATTACAATGTACTGCAGGTCATAAATTGTCAGTCAGGGTCCCTACCAAACCATTGTTGGAAAAAAGTGGTAGAAATGCCACCAAATATAAAGTGAGATGGAGAAATCTGCAGCAATGTCAGA…	ALA	notfound	notfound	GLY	notfound	notfound	notfound	notfound	LEU	notfound	notfound	LEU	notfound	notfound	notfound	3	Yasuni, Orellana	CCG	Fruit
CCN	no	> CCN_YDL227C_HO chromosome4:46271-48031 - 692 ATGCTTTCTGAAAACACGACTATTCTGATGGCTAACGGTGAAATTAAAGACATCGCAAACGTCACGGCTAACTCTTACGTTATGTGCGCAGATGGCTCCGCTGCCCGCGTCATAAATGTCACACAGGGCTATCAGAAAATCTATAATATACAGCAAAAAACCAAACACAGAGCTTTTGAAGGTGAACCTGGTAGGTTAGATCCCAGGCGTAGAACAGTTTATCAGCGTCTTGCATTACAATGTACTGCAGGTCATAAATTGTCAGTCAGGGTCCCTACCAAACCACTGTTGGAAAAAAGTGGTAGAAATGCCACCAAATATAAAGTGAGATGGAGAAATCTGCAGCAATGTC…	CCN_YDL227C_HO chromosome4:46271-48031 - 692ATGCTTTCTGAAAACACGACTATTCTGATGGCTAACGGTGAAATTAAAGACATCGCAAACGTCACGGCTAACTCTTACGTTATGTGCGCAGATGGCTCCGCTGCCCGCGTCATAAATGTCACACAGGGCTATCAGAAAATCTATAATATACAGCAAAAAACCAAACACAGAGCTTTTGAAGGTGAACCTGGTAGGTTAGATCCCAGGCGTAGAACAGTTTATCAGCGTCTTGCATTACAATGTACTGCAGGTCATAAATTGTCAGTCAGGGTCCCTACCAAACCACTGTTGGAAAAAAGTGGTAGAAATGCCACCAAATATAAAGTGAGATGGAGAAATCTGCAGCAATGTCAGA…	ALA	notfound	notfound	GLY	notfound	notfound	notfound	notfound	LEU	notfound	notfound	LEU	notfound	notfound	notfound	3	Russian Far East	CCN	Fruit
CDF	no	> CDF_YDL227C_HO chromosome4:46271-48031 - 692 ATGCTTTCTGAAAACACGACTATTCTGATGGCTAACGGTGAAATTAAAGACATCGCAAACGTCACGGCTAACTCTTACGTTATGTGCGCAGATGGCTCCGCTGCCCGCGTCATAAATGTCACACAGGGCTATCAGAAAATCTATAATATACAGCAAAAAACCAAACACAGAGCTTTTGAAGGTGAACCTGGTAGGTTAGATCCCAGGCGTAGAACAGTTTATCAGCGTCTTGCATTACAATGTACTGCAGGTCATAAATTGTCAGTCAGGGTCCCTACCAAACCACTGTTGGAAAAAAGTGGTAGAAATGCCACCAAATATAAAGTGAGATGGAGAAATCTGCAGCAATGTC…	CDF_YDL227C_HO chromosome4:46271-48031 - 692ATGCTTTCTGAAAACACGACTATTCTGATGGCTAACGGTGAAATTAAAGACATCGCAAACGTCACGGCTAACTCTTACGTTATGTGCGCAGATGGCTCCGCTGCCCGCGTCATAAATGTCACACAGGGCTATCAGAAAATCTATAATATACAGCAAAAAACCAAACACAGAGCTTTTGAAGGTGAACCTGGTAGGTTAGATCCCAGGCGTAGAACAGTTTATCAGCGTCTTGCATTACAATGTACTGCAGGTCATAAATTGTCAGTCAGGGTCCCTACCAAACCACTGTTGGAAAAAAGTGGTAGAAATGCCACCAAATATAAAGTGAGATGGAGAAATCTGCAGCAATGTCAGA…	ALA	notfound	notfound	GLY	notfound	notfound	notfound	notfound	LEU	notfound	notfound	LEU	notfound	notfound	notfound	3	Botanical garden, Blagoveshchensk, Russia	CDF	Fruit
CEH	no	> CEH_YDL227C_HO chromosome4:46271-48031 - 692 ATGCTTTCTGAAAACACGACTATTCTGATGGCTAACGGTGAAATTAAAGACATCGCAAACGTCACGGCTAACTCTTACGTTATGTGCGCAGATGGCTCCGCTGCCCGCGTCATAAATGTCACACAGGGCTATCAGAAAATCTATAATATACAGCAAAAAACCAAACACAGAGCTTTTGAAGGTGAACCTGGTAGGTTAGATCCCAGGCGTAGAACAGTTTATCAGCGTCTTGCATTACAATGTACTGCAGGTCATAAATTGTCAGTCAGGGTCCCTACCAAACCACTGTTGGAAAAAAGTGGTAGAAATGCCACCAAATATAAAGTGAGATGGAGAAATCTGCAGCAATGTC…	CEH_YDL227C_HO chromosome4:46271-48031 - 692ATGCTTTCTGAAAACACGACTATTCTGATGGCTAACGGTGAAATTAAAGACATCGCAAACGTCACGGCTAACTCTTACGTTATGTGCGCAGATGGCTCCGCTGCCCGCGTCATAAATGTCACACAGGGCTATCAGAAAATCTATAATATACAGCAAAAAACCAAACACAGAGCTTTTGAAGGTGAACCTGGTAGGTTAGATCCCAGGCGTAGAACAGTTTATCAGCGTCTTGCATTACAATGTACTGCAGGTCATAAATTGTCAGTCAGGGTCCCTACCAAACCACTGTTGGAAAAAAGTGGTAGAAATGCCACCAAATATAAAGTGAGATGGAGAAATCTGCAGCAATGTCAGA…	ALA	notfound	notfound	GLY	notfound	notfound	notfound	notfound	LEU	notfound	notfound	LEU	notfound	notfound	notfound	3	Taiwan	CEH	Fruit
CEN	no	> CEN_YDL227C_HO chromosome4:46271-48031 - 692 ATGCTTTCTGAAAACACGACTATTCTGATGGCTAACGGTGAAATTAAAGACATCGCAAACGTCACGGCTAACTCTTACGTTATGTGCGCAGATGGCTCCGCTGCCCGCGTCATAAATGTCACACAGGGCTATCAGAAAATCTATAATATACAGCAAAAAACCAAACACAGAGCTTTTGAAGGTGAACCTGGTAGGTTAGATCCCAGGCGTAGAACAGTTTATCAGCGTCTTGCATTACAATGTACTGCAGGTCATAAATTGTCAGTCAGGGTCCCTACCAAACCACTGTTGGAAAAAAGTGGTAGAAATGCCACCAAATATAAAGTGAGATGGAGAAATCTGCAGCAATGTC…	CEN_YDL227C_HO chromosome4:46271-48031 - 692ATGCTTTCTGAAAACACGACTATTCTGATGGCTAACGGTGAAATTAAAGACATCGCAAACGTCACGGCTAACTCTTACGTTATGTGCGCAGATGGCTCCGCTGCCCGCGTCATAAATGTCACACAGGGCTATCAGAAAATCTATAATATACAGCAAAAAACCAAACACAGAGCTTTTGAAGGTGAACCTGGTAGGTTAGATCCCAGGCGTAGAACAGTTTATCAGCGTCTTGCATTACAATGTACTGCAGGTCATAAATTGTCAGTCAGGGTCCCTACCAAACCACTGTTGGAAAAAAGTGGTAGAAATGCCACCAAATATAAAGTGAGATGGAGAAATCTGCAGCAATGTCAGA…	ALA	notfound	notfound	GLY	notfound	notfound	notfound	notfound	LEU	notfound	notfound	LEU	notfound	notfound	notfound	3	NA	CEN	Fruit
SACE_YCN	no	> SACE_YCN_YDL227C_HO chromosome4:46271-48031 - 692 ATGCTTTCTGAAAACACGACTATTCTGATGGCTAACGGTGAAATTAAAGACATCGCAAACGTCACGGCTAACTCTTACGTTATGTGCGCAGATGGCTCCGCTGCCCGCGTCATAAATGTCACACAGGGCTATCAGAAAATCTATAATATACAGCAAAAAACCAAACACAGAGCTTTTGAAGGTGAACCTGGTAGGTTAGATCCCAGGCGTAGAACAGTTTATCAGCGTCTTGCATTACAATGTACTGCAGGTCATAAATTGTCAGTCAGGGTCCCTACCAAACCACTGTTGGAAAAAAGTGGTAGAAATGCCACCAAATATAAAGTGAGATGGAGAAATCTGCAGCA…	SACE_YCN_YDL227C_HO chromosome4:46271-48031 - 692ATGCTTTCTGAAAACACGACTATTCTGATGGCTAACGGTGAAATTAAAGACATCGCAAACGTCACGGCTAACTCTTACGTTATGTGCGCAGATGGCTCCGCTGCCCGCGTCATAAATGTCACACAGGGCTATCAGAAAATCTATAATATACAGCAAAAAACCAAACACAGAGCTTTTGAAGGTGAACCTGGTAGGTTAGATCCCAGGCGTAGAACAGTTTATCAGCGTCTTGCATTACAATGTACTGCAGGTCATAAATTGTCAGTCAGGGTCCCTACCAAACCACTGTTGGAAAAAAGTGGTAGAAATGCCACCAAATATAAAGTGAGATGGAGAAATCTGCAGCAATG…	ALA	notfound	notfound	GLY	notfound	notfound	notfound	notfound	LEU	notfound	notfound	LEU	notfound	notfound	notfound	3	Philippines	SACE_YCN	Fruit
SACE_YCW	no	> SACE_YCW_YDL227C_HO chromosome4:46271-48031 - 692 ATGCTTTCTGAAAACACGACTGTTCTGATGGCTAACGGTGAAATTAAAGACATCGCAAACGTCACGGCTAACTCTTACGTTATGTGCGCAGATGGCTCCGCTGCCCGCGTCATAAATGTCACACAGGGCTATCAGAAAATCTATAATATACAGCAAAAAACCAAACACAGAGCTTTTGAAGGTGAACCTGGTAGGTTAGATCCCAGGCGTAGAACAGTTTATCAGCGTCTTGCATTACAATGTACTGCAGGTCATAAATTGTCAGTCAGGGTCCCTACCAAACCACTGTTGGAAAAAAGTGGTAGAAATGCCACCAAATATAAAGTGAGATGGAGAAATCTGCAGCA…	SACE_YCW_YDL227C_HO chromosome4:46271-48031 - 692ATGCTTTCTGAAAACACGACTGTTCTGATGGCTAACGGTGAAATTAAAGACATCGCAAACGTCACGGCTAACTCTTACGTTATGTGCGCAGATGGCTCCGCTGCCCGCGTCATAAATGTCACACAGGGCTATCAGAAAATCTATAATATACAGCAAAAAACCAAACACAGAGCTTTTGAAGGTGAACCTGGTAGGTTAGATCCCAGGCGTAGAACAGTTTATCAGCGTCTTGCATTACAATGTACTGCAGGTCATAAATTGTCAGTCAGGGTCCCTACCAAACCACTGTTGGAAAAAAGTGGTAGAAATGCCACCAAATATAAAGTGAGATGGAGAAATCTGCAGCAATG…	ALA	notfound	notfound	GLY	notfound	notfound	notfound	notfound	LEU	notfound	notfound	LEU	notfound	notfound	notfound	3	Bahamas	SACE_YCW	Fruit
BCB	no	> BCB_YDL227C_HO chromosome4:46271-48031 - 692 ATGCTTTCTGAAAACACGACTATTCTGATGGCTAACGGTGAAATTAAAGACATCGCAAACGTCACGGCTAACTCTTACGTTATGTGCGCAGATGGCTCCGCTGCCCGCGTCATAAATGTCACACAGGGCTATCAGAAAATCTATAATATACAGCAAAAAACCAAACACAGAGCTTTTGAAGGTGAACCTGGTAGGTTAGATCCCAGGCGTAGAACAGTTTATCAGCGTCTTGCATTACAATGTACTGCAGGTCATAAATTGTCAGTCAGGGTCCCTACCAAACCACTGTTGGAAAAAAGTGGTAGAAATGCCACCAAATATAAAGTGAGATGGAGAAATCTGCAGCAATGTC…	BCB_YDL227C_HO chromosome4:46271-48031 - 692ATGCTTTCTGAAAACACGACTATTCTGATGGCTAACGGTGAAATTAAAGACATCGCAAACGTCACGGCTAACTCTTACGTTATGTGCGCAGATGGCTCCGCTGCCCGCGTCATAAATGTCACACAGGGCTATCAGAAAATCTATAATATACAGCAAAAAACCAAACACAGAGCTTTTGAAGGTGAACCTGGTAGGTTAGATCCCAGGCGTAGAACAGTTTATCAGCGTCTTGCATTACAATGTACTGCAGGTCATAAATTGTCAGTCAGGGTCCCTACCAAACCACTGTTGGAAAAAAGTGGTAGAAATGCCACCAAATATAAAGTGAGATGGAGAAATCTGCAGCAATGTCAGA…	ALA	notfound	notfound	GLY	notfound	notfound	notfound	notfound	LEU	notfound	notfound	LEU	notfound	notfound	notfound	3	French Guiana	BCB	Human
BCC	no	> BCC_YDL227C_HO chromosome4:46271-48031 - 692 ATGCTTTCTGAAAACACGACTATTCTGATGGCTAACGGTGAAATTAAAGACATCGCAAACGTCACGGCTAACTCTTACGTTATGTGCGCAGATGGCTCCGCTGCCCGCGTCATAAATGTCACAMAGGGCTATCAGAAAATCTATAATATACARCAAAAAACCAAACACAGAGCTTTTGAAGGTGAACCTGGTAGGTTAGATCCCAGGCGTAGAACAGTTTATCAGCGTCTTGCATTACAATGTACTGCAGGTCATAAATTGTCAGTCAGGGTCCCTACCAAACCACTGTTGGAAAAAAGTGGTAGAAATGCCACCAAATATAAAGTGAGATGGAGAAATCTGCAGCAATGTC…	BCC_YDL227C_HO chromosome4:46271-48031 - 692ATGCTTTCTGAAAACACGACTATTCTGATGGCTAACGGTGAAATTAAAGACATCGCAAACGTCACGGCTAACTCTTACGTTATGTGCGCAGATGGCTCCGCTGCCCGCGTCATAAATGTCACAMAGGGCTATCAGAAAATCTATAATATACARCAAAAAACCAAACACAGAGCTTTTGAAGGTGAACCTGGTAGGTTAGATCCCAGGCGTAGAACAGTTTATCAGCGTCTTGCATTACAATGTACTGCAGGTCATAAATTGTCAGTCAGGGTCCCTACCAAACCACTGTTGGAAAAAAGTGGTAGAAATGCCACCAAATATAAAGTGAGATGGAGAAATCTGCAGCAATGTCAGA…	ALA	notfound	notfound	GLY	notfound	notfound	notfound	notfound	LEU	notfound	notfound	LEU	notfound	notfound	notfound	3	French Guiana	BCC	Human
BCD	no	> BCD_YDL227C_HO chromosome4:46271-48031 - 692 ATGCTTTCTGAAAACACGACTATTCTGATGGCTAACGGTGAAATTAAAGACATCGCAAACGTCACGGCTAACTCTTACGTTATGTGCGCAGATGGCTCCGCTGCCCGCGTCATAAATGTCACAMAGGGCTATCAGAAAATCTATAATATACARCAAAAAACCAAACACAGAGCTTTTGAAGGTGAACCTGGTAGGTTAGATCCCAGGCGTAGAACAGTTTATCAGCGTCTTGCATTACAATGTACTGCAGGTCATAAATTGTCAGTCAGGGTCCCTACCAAACCACTGTTGGAAAAAAGTGGTAGAAATGCCACCAAATATAAAGTGAGATGGAGAAATCTGCAGCAATGTC…	BCD_YDL227C_HO chromosome4:46271-48031 - 692ATGCTTTCTGAAAACACGACTATTCTGATGGCTAACGGTGAAATTAAAGACATCGCAAACGTCACGGCTAACTCTTACGTTATGTGCGCAGATGGCTCCGCTGCCCGCGTCATAAATGTCACAMAGGGCTATCAGAAAATCTATAATATACARCAAAAAACCAAACACAGAGCTTTTGAAGGTGAACCTGGTAGGTTAGATCCCAGGCGTAGAACAGTTTATCAGCGTCTTGCATTACAATGTACTGCAGGTCATAAATTGTCAGTCAGGGTCCCTACCAAACCACTGTTGGAAAAAAGTGGTAGAAATGCCACCAAATATAAAGTGAGATGGAGAAATCTGCAGCAATGTCAGA…	ALA	notfound	notfound	GLY	notfound	notfound	notfound	notfound	LEU	notfound	notfound	LEU	notfound	notfound	notfound	3	French Guiana	BCD	Human
BCE	no	> BCE_YDL227C_HO chromosome4:46271-48031 - 692 ATGCTTTCTGAAAACACGACTATTCTGATGGCTAACGGTGAAATTAAAGACATCGCAAACGTCACGGCTAACTCTTACGTTATGTGCGCAGATGGCTCCGCTGCCCGCGTCATAAATGTCACAAAGGGCTATCAGAAAATCTATAATATACAGCAAAAAACCAAACACAGAGCTTTTGAAGGTGAACCTGGTAGGTTAGATCCCAGGCGTAGAACAGTTTATCAGCGTCTTGCATTACAATGTACTGCAGGTCATAAATTGTCAGTCAGGGTCCCTACCAAACCACTGTTGGAAAAAAGTGGTAGAAATGCCACCAAATATAAAGTGAGATGGAGAAATCTGCAGCAATGTC…	BCE_YDL227C_HO chromosome4:46271-48031 - 692ATGCTTTCTGAAAACACGACTATTCTGATGGCTAACGGTGAAATTAAAGACATCGCAAACGTCACGGCTAACTCTTACGTTATGTGCGCAGATGGCTCCGCTGCCCGCGTCATAAATGTCACAAAGGGCTATCAGAAAATCTATAATATACAGCAAAAAACCAAACACAGAGCTTTTGAAGGTGAACCTGGTAGGTTAGATCCCAGGCGTAGAACAGTTTATCAGCGTCTTGCATTACAATGTACTGCAGGTCATAAATTGTCAGTCAGGGTCCCTACCAAACCACTGTTGGAAAAAAGTGGTAGAAATGCCACCAAATATAAAGTGAGATGGAGAAATCTGCAGCAATGTCAGA…	ALA	notfound	notfound	GLY	notfound	notfound	notfound	notfound	LEU	notfound	notfound	LEU	notfound	notfound	notfound	3	French Guiana	BCE	Human
BCF	no	> BCF_YDL227C_HO chromosome4:46271-48031 - 692 ATGCTTTCTGAAAACACGACTATTCTGATGGCTAACGGTGAAATTAAAGACATCGCAAACGTCACGGCTAACTCTTACGTTATGTGCGCAGATGGCTCCGCTGCCCGCGTCATAAATGTCACACAGGGCTATCAGAAAATCTATAATATACAGCAAAAAACCAAACACAGAGCTTTTGAAGGTGAGCCTGGTAGGTTAGATCCCAGGCGTAGAACAGTTTATCAGCGTCTTGCATTACAATGTACTGCAGGTCATAAATTGTCAGTCAGGGTCCCTACCAAACCACTGTTGGAAAAAAGTGGTAGAAATGCCACCAAATATAAAGTGAGATGGAGAAATCTGCAGCAATGTC…	BCF_YDL227C_HO chromosome4:46271-48031 - 692ATGCTTTCTGAAAACACGACTATTCTGATGGCTAACGGTGAAATTAAAGACATCGCAAACGTCACGGCTAACTCTTACGTTATGTGCGCAGATGGCTCCGCTGCCCGCGTCATAAATGTCACACAGGGCTATCAGAAAATCTATAATATACAGCAAAAAACCAAACACAGAGCTTTTGAAGGTGAGCCTGGTAGGTTAGATCCCAGGCGTAGAACAGTTTATCAGCGTCTTGCATTACAATGTACTGCAGGTCATAAATTGTCAGTCAGGGTCCCTACCAAACCACTGTTGGAAAAAAGTGGTAGAAATGCCACCAAATATAAAGTGAGATGGAGAAATCTGCAGCAATGTCAGA…	ALA	notfound	notfound	GLY	notfound	notfound	notfound	notfound	LEU	notfound	notfound	LEU	notfound	notfound	notfound	3	French Guiana	BCF	Human
BCG	no	> BCG_YDL227C_HO chromosome4:46271-48031 - 692 ATGCTTTCTGAAAACACGACTATTCTGATGGCTAACGGTGAAATTAAAGACATCGCAAACGTCACGGCTAACTCTTACGTTATGTGCGCAGATGGCTCCGCTGCCCGCGTCATAAATGTCACAMAGGGCTATCAGAAAATCTATAATATACAGCAAAAAACCAAACACAGAGCTTTTGAAGGTGAACCTGGTAGGTTAGATCCCAGGCGTAGAACAGTTTATCAGCGTCTTGCATTACAATGTACTGCAGGTCATAAATTGTCAGTCAGGGTCCCTACCAAACCACTGTTGGAAAAAAGTGGTAGAAATGCCACCAAATATAAAGTGAGATGGAGAAATCTGCAGCAATGTC…	BCG_YDL227C_HO chromosome4:46271-48031 - 692ATGCTTTCTGAAAACACGACTATTCTGATGGCTAACGGTGAAATTAAAGACATCGCAAACGTCACGGCTAACTCTTACGTTATGTGCGCAGATGGCTCCGCTGCCCGCGTCATAAATGTCACAMAGGGCTATCAGAAAATCTATAATATACAGCAAAAAACCAAACACAGAGCTTTTGAAGGTGAACCTGGTAGGTTAGATCCCAGGCGTAGAACAGTTTATCAGCGTCTTGCATTACAATGTACTGCAGGTCATAAATTGTCAGTCAGGGTCCCTACCAAACCACTGTTGGAAAAAAGTGGTAGAAATGCCACCAAATATAAAGTGAGATGGAGAAATCTGCAGCAATGTCAGA…	ALA	notfound	notfound	GLY	notfound	notfound	notfound	notfound	LEU	notfound	notfound	LEU	notfound	notfound	notfound	3	French Guiana	BCG	Human
BCH	no	> BCH_YDL227C_HO chromosome4:46271-48031 - 692 ATGCTTTCTGAAAACACGACTATTCTGATGGCTAACGGTGAAATTAAAGACATCGCAAACGTCACGGCTAACTCTTACGTTATGTGCGCAGATGGCTCCGCTGCCCGCGTCATAAATGTCACACAGGGCTATCAGAAAATCTATAATATACAACAAAAAACCAAACACAGAGCTTTTGAAGGTGAACCTGGTAGGTTAGATCCCAGGCGTAGAACAGTTTATCAGCGTCTTGCATTACAATGTACTGCAGGTCATAAATTGTCAGTCAGGGTCCCTACCAAACCACTGTTGGAAAAAAGTGGTAGAAATGCCACCAAATATAAAGTGAGATGGAGAAATCTGCAGCAATGTC…	BCH_YDL227C_HO chromosome4:46271-48031 - 692ATGCTTTCTGAAAACACGACTATTCTGATGGCTAACGGTGAAATTAAAGACATCGCAAACGTCACGGCTAACTCTTACGTTATGTGCGCAGATGGCTCCGCTGCCCGCGTCATAAATGTCACACAGGGCTATCAGAAAATCTATAATATACAACAAAAAACCAAACACAGAGCTTTTGAAGGTGAACCTGGTAGGTTAGATCCCAGGCGTAGAACAGTTTATCAGCGTCTTGCATTACAATGTACTGCAGGTCATAAATTGTCAGTCAGGGTCCCTACCAAACCACTGTTGGAAAAAAGTGGTAGAAATGCCACCAAATATAAAGTGAGATGGAGAAATCTGCAGCAATGTCAGA…	ALA	notfound	notfound	GLY	notfound	notfound	notfound	notfound	LEU	notfound	notfound	LEU	notfound	notfound	notfound	3	French Guiana	BCH	Human
BCI	no	> BCI_YDL227C_HO chromosome4:46271-48031 - 692 ATGCTTTCTGAAAACACGACTATTCTGATGGCTAACGGTGAAATTAAAGACATCGCAAACGTCACGGCTAACTCTTACGTTATGTGCGCAGATGGCTCCGCTGCCCGCGTCATAAATGTCACAAAGGGCTATCAGAAAATCTATAATATACAGCAAAAAACCAAACACAGAGCTTTTGAAGGTGAACCTGGTAGGTTAGATCCCAGGCGTAGAACAGTTTATCAGCGTCTTGCATTACAATGTACTGCAGGTCATAAATTGTCAGTCAGGGTCCCTACCAAACCACTGTTGGAAAAAAGTGGTAGAAATGCCACCAAATATAAAGTGAGATGGAGAAATCTGCAGCAATGTC…	BCI_YDL227C_HO chromosome4:46271-48031 - 692ATGCTTTCTGAAAACACGACTATTCTGATGGCTAACGGTGAAATTAAAGACATCGCAAACGTCACGGCTAACTCTTACGTTATGTGCGCAGATGGCTCCGCTGCCCGCGTCATAAATGTCACAAAGGGCTATCAGAAAATCTATAATATACAGCAAAAAACCAAACACAGAGCTTTTGAAGGTGAACCTGGTAGGTTAGATCCCAGGCGTAGAACAGTTTATCAGCGTCTTGCATTACAATGTACTGCAGGTCATAAATTGTCAGTCAGGGTCCCTACCAAACCACTGTTGGAAAAAAGTGGTAGAAATGCCACCAAATATAAAGTGAGATGGAGAAATCTGCAGCAATGTCAGA…	ALA	notfound	notfound	GLY	notfound	notfound	notfound	notfound	LEU	notfound	notfound	LEU	notfound	notfound	notfound	3	French Guiana	BCI	Human
BCK	no	> BCK_YDL227C_HO chromosome4:46271-48031 - 692 ATGCTTTCTGAAAACACGACTATTCTGATGGCTAACGGTGAAATTAAAGACATCGCAAACGTCACGGCTAACTCTTACGTTATGTGCGCAGATGGCTCCGCTGCCCGCGTCATAAATGTCACACAGGGCTATCAGAAAATCTATAATATACAACAAAAAACCAAACACAGAGCTTTTGAAGGTGAACCTGGTAGGTTAGATCCCAGGCGTAGAACAGTTTATCAGCGTCTTGCATTACAATGTACTGCAGGTCATAAATTGTCAGTCAGGGTCCCTACCAAACCACTGTTGGAAAAAAGTGGTAGAAATGCCACCAAATATAAAGTGAGATGGAGAAATCTGCAGCAATGTC…	BCK_YDL227C_HO chromosome4:46271-48031 - 692ATGCTTTCTGAAAACACGACTATTCTGATGGCTAACGGTGAAATTAAAGACATCGCAAACGTCACGGCTAACTCTTACGTTATGTGCGCAGATGGCTCCGCTGCCCGCGTCATAAATGTCACACAGGGCTATCAGAAAATCTATAATATACAACAAAAAACCAAACACAGAGCTTTTGAAGGTGAACCTGGTAGGTTAGATCCCAGGCGTAGAACAGTTTATCAGCGTCTTGCATTACAATGTACTGCAGGTCATAAATTGTCAGTCAGGGTCCCTACCAAACCACTGTTGGAAAAAAGTGGTAGAAATGCCACCAAATATAAAGTGAGATGGAGAAATCTGCAGCAATGTCAGA…	ALA	notfound	notfound	GLY	notfound	notfound	notfound	notfound	LEU	notfound	notfound	LEU	notfound	notfound	notfound	3	French Guiana	BCK	Human
BCL	no	> BCL_YDL227C_HO chromosome4:46271-48031 - 692 ATGCTTTCTGAAAACACGACTATTCTGATGGCTAACGGTGAAATTAAAGACATCGCAAACGTCACGGCTAACTCTTACGTTATGTGCGCAGATGGCTCCGCTGCCCGCGTCATAAATGTCACACAGGGCTATCAGAAAATCTATAATATACAACAAAAAACCAAACACAGAGCTTTTGAAGGTGAACCTGGTAGGTTAGATCCCAGGCGTAGAACAGTTTATCAGCGTCTTGCATTACAATGTACTGCAGGTCATAAATTGTCAGTCAGGGTCCCTACCAAACCACTGTTGGAAAAAAGTGGTAGAAATGCCACCAAATATAAAGTGAGATGGAGAAATCTGCAGCAATGTC…	BCL_YDL227C_HO chromosome4:46271-48031 - 692ATGCTTTCTGAAAACACGACTATTCTGATGGCTAACGGTGAAATTAAAGACATCGCAAACGTCACGGCTAACTCTTACGTTATGTGCGCAGATGGCTCCGCTGCCCGCGTCATAAATGTCACACAGGGCTATCAGAAAATCTATAATATACAACAAAAAACCAAACACAGAGCTTTTGAAGGTGAACCTGGTAGGTTAGATCCCAGGCGTAGAACAGTTTATCAGCGTCTTGCATTACAATGTACTGCAGGTCATAAATTGTCAGTCAGGGTCCCTACCAAACCACTGTTGGAAAAAAGTGGTAGAAATGCCACCAAATATAAAGTGAGATGGAGAAATCTGCAGCAATGTCAGA…	ALA	notfound	notfound	GLY	notfound	notfound	notfound	notfound	LEU	notfound	notfound	LEU	notfound	notfound	notfound	3	French Guiana	BCL	Human
BCM	no	> BCM_YDL227C_HO chromosome4:46271-48031 - 692 ATGCTTTCTGAAAACACGACTATTCTGATGGCTAACGGTGAAATTAAAGACATCGCAAACGTCACGGCTAACTCTTACGTTATGTGCGCAGATGGCTCCGCTGCCCGCGTCATAAATGTCACACAGGGCTATCAGAAAATCTATAATATACAACAAAAAACCAAACACAGAGCTTTTGAAGGTGAACCTGGTAGGTTAGATCCCAGGCGTAGAACAGTTTATCAGCGTCTTGCATTACAATGTACTGCAGGTCATAAATTGTCAGTCAGGGTCCCTACCAAACCACTGTTGGAAAAAAGTGGTAGAAATGCCACCAAATATAAAGTGAGATGGAGAAATCTGCAGCAATGTC…	BCM_YDL227C_HO chromosome4:46271-48031 - 692ATGCTTTCTGAAAACACGACTATTCTGATGGCTAACGGTGAAATTAAAGACATCGCAAACGTCACGGCTAACTCTTACGTTATGTGCGCAGATGGCTCCGCTGCCCGCGTCATAAATGTCACACAGGGCTATCAGAAAATCTATAATATACAACAAAAAACCAAACACAGAGCTTTTGAAGGTGAACCTGGTAGGTTAGATCCCAGGCGTAGAACAGTTTATCAGCGTCTTGCATTACAATGTACTGCAGGTCATAAATTGTCAGTCAGGGTCCCTACCAAACCACTGTTGGAAAAAAGTGGTAGAAATGCCACCAAATATAAAGTGAGATGGAGAAATCTGCAGCAATGTCAGA…	ALA	notfound	notfound	GLY	notfound	notfound	notfound	notfound	LEU	notfound	notfound	LEU	notfound	notfound	notfound	3	French Guiana	BCM	Human
BCN	no	> BCN_YDL227C_HO chromosome4:46271-48031 - 692 ATGCTTTCTGAAAACACGACTATTCTGATGGCTAACGGTGAAATTAAAGACATCGCAAACGTCACGGCTAACTCTTACGTTATGTGCGCAGATGGCTCCGCTGCCCGCGTCATAAATGTCACACAGGGCTATCAGAAAATCTATAATATACAACAAAAAACCAAACACAGAGCTTTTGAAGGTGAACCTGGTAGGTTAGATCCCAGGCGTAGAACAGTTTATCAGCGTCTTGCATTACAATGTACTGCAGGTCATAAATTGTCAGTCAGGGTCCCTACCAAACCACTGTTGGAAAAAAGTGGTAGAAATGCCACCAAATATAAAGTGAGATGGAGAAATCTGCAGCAATGTC…	BCN_YDL227C_HO chromosome4:46271-48031 - 692ATGCTTTCTGAAAACACGACTATTCTGATGGCTAACGGTGAAATTAAAGACATCGCAAACGTCACGGCTAACTCTTACGTTATGTGCGCAGATGGCTCCGCTGCCCGCGTCATAAATGTCACACAGGGCTATCAGAAAATCTATAATATACAACAAAAAACCAAACACAGAGCTTTTGAAGGTGAACCTGGTAGGTTAGATCCCAGGCGTAGAACAGTTTATCAGCGTCTTGCATTACAATGTACTGCAGGTCATAAATTGTCAGTCAGGGTCCCTACCAAACCACTGTTGGAAAAAAGTGGTAGAAATGCCACCAAATATAAAGTGAGATGGAGAAATCTGCAGCAATGTCAGA…	ALA	notfound	notfound	GLY	notfound	notfound	notfound	notfound	LEU	notfound	notfound	LEU	notfound	notfound	notfound	3	French Guiana	BCN	Human
BCP	no	> BCP_YDL227C_HO chromosome4:46271-48031 - 692 ATGCTTTCTGAAAACACGACTATTCTGATGGCTAACGGTGAAATTAAAGACATCGCAAACGTCACGGCTAACTCTTACGTTATGTGCGCAGATGGCTCCGCTGCCCGCGTCATAAATGTCACACAGGGCTATCAGAAAATCTATAATATACAGCAAAAAACCAAACACAGAGCTTTTGAAGGTGAACCTGGTAGGTTAGATCCCAGGCGTAGAACAGTTTATCAGCGTCTTGCATTACAATGTACTGCAGGTCATAAATTGTCAGTCAGGGTCCCTACCAAACCACTGTTGGAAAAAAGTGGTAGAAATGCCACCAAATATAAAGTGAGATGGAGAAATCTGCAGCAATGTC…	BCP_YDL227C_HO chromosome4:46271-48031 - 692ATGCTTTCTGAAAACACGACTATTCTGATGGCTAACGGTGAAATTAAAGACATCGCAAACGTCACGGCTAACTCTTACGTTATGTGCGCAGATGGCTCCGCTGCCCGCGTCATAAATGTCACACAGGGCTATCAGAAAATCTATAATATACAGCAAAAAACCAAACACAGAGCTTTTGAAGGTGAACCTGGTAGGTTAGATCCCAGGCGTAGAACAGTTTATCAGCGTCTTGCATTACAATGTACTGCAGGTCATAAATTGTCAGTCAGGGTCCCTACCAAACCACTGTTGGAAAAAAGTGGTAGAAATGCCACCAAATATAAAGTGAGATGGAGAAATCTGCAGCAATGTCAGA…	ALA	notfound	notfound	GLY	notfound	notfound	notfound	notfound	LEU	notfound	notfound	LEU	notfound	notfound	notfound	3	French Guiana	BCP	Human
BCQ	no	> BCQ_YDL227C_HO chromosome4:46271-48031 - 692 ATGCTTTCTGAAAACACGACTATTCTGATGGCTAACGGTGAAATTAAAGACATCGCAAACGTCACGGCTAACTCTTACGTTATGTGCGCAGATGGCTCCGCTGCCCGCGTCATAAATGTCACAAAGGGCTATCAGAAAATCTATAATATACAGCAAAAAACCAAACACAGAGCTTTTGAAGGTGAACCTGGTAGGTTAGATCCCAGGCGTAGAACAGTTTATCAGCGTCTTGCATTACAATGTACTGCAGGTCATAAATTGTCAGTCAGGGTCCCTACCAAACCACTGTTGGAAAAAAGTGGTAGAAATGCCACCAAATATAAAGTGAGATGGAGAAATCTGCAGCAATGTC…	BCQ_YDL227C_HO chromosome4:46271-48031 - 692ATGCTTTCTGAAAACACGACTATTCTGATGGCTAACGGTGAAATTAAAGACATCGCAAACGTCACGGCTAACTCTTACGTTATGTGCGCAGATGGCTCCGCTGCCCGCGTCATAAATGTCACAAAGGGCTATCAGAAAATCTATAATATACAGCAAAAAACCAAACACAGAGCTTTTGAAGGTGAACCTGGTAGGTTAGATCCCAGGCGTAGAACAGTTTATCAGCGTCTTGCATTACAATGTACTGCAGGTCATAAATTGTCAGTCAGGGTCCCTACCAAACCACTGTTGGAAAAAAGTGGTAGAAATGCCACCAAATATAAAGTGAGATGGAGAAATCTGCAGCAATGTCAGA…	ALA	notfound	notfound	GLY	notfound	notfound	notfound	notfound	LEU	notfound	notfound	LEU	notfound	notfound	notfound	3	French Guiana	BCQ	Human
BDP	no	> BDP_YDL227C_HO chromosome4:46271-48031 - 692 ATGCTTTCTGAAAACACGACTATTCTGATGGCTAACGGTGAAATTAAAGACATCGCAAACGTCACGGCTAACTCTTACGTTATGTGCGCAGATGGCTCCGCTGCCCGCGTCATAAATGTCACACAGGGCTATCAGAAAATCTATAATATACAACAAAAAACCAAACACAGAGCTTTTGAAGGTGAACCTGGTAGGTTAGATCCCAGGCGTAGAACAGTTTATCAGCGTCTTGCATTACAATGTACTGCAGGTCATAAATTGTCAGTCAGGGTCCCTACCAAACCACTGTTGGAAAAAAGTGGTAGAAATGCCACCAAATATAAAGTGAGATGGAGAAATCTGCAGCAATGTC…	BDP_YDL227C_HO chromosome4:46271-48031 - 692ATGCTTTCTGAAAACACGACTATTCTGATGGCTAACGGTGAAATTAAAGACATCGCAAACGTCACGGCTAACTCTTACGTTATGTGCGCAGATGGCTCCGCTGCCCGCGTCATAAATGTCACACAGGGCTATCAGAAAATCTATAATATACAACAAAAAACCAAACACAGAGCTTTTGAAGGTGAACCTGGTAGGTTAGATCCCAGGCGTAGAACAGTTTATCAGCGTCTTGCATTACAATGTACTGCAGGTCATAAATTGTCAGTCAGGGTCCCTACCAAACCACTGTTGGAAAAAAGTGGTAGAAATGCCACCAAATATAAAGTGAGATGGAGAAATCTGCAGCAATGTCAGA…	ALA	notfound	notfound	GLY	notfound	notfound	notfound	notfound	LEU	notfound	notfound	LEU	notfound	notfound	notfound	3	French Guiana	BDP	Human
BDQ	no	> BDQ_YDL227C_HO chromosome4:46271-48031 - 692 ATGCTTTCTGAAAACACGACTATTCTGATGGCTAACGGTGAAATTAAAGACATCGCAAACGTCACGGCTAACTCTTACGTTATGTGCGCAGATGGCTCCGCTGCCCGCGTCATAAATGTCACACAGGGCTATCAGAAAATCTATAATATACARCAAAAAACCAAACACAGAGCTTTTGAAGGTGAACCTGGTAGGTTAGATCCCAGGCGTAGAACAGTTTATCAGCGTCTTGCATTACAATGTACTGCAGGTCATAAATTGTCAGTCAGGGTCCCTACCAAACCACTGTTGGAAAAAAGTGGTAGAAATGCCACCAAATATAAAGTGAGATGGAGAAATCTGCAGCAATGTC…	BDQ_YDL227C_HO chromosome4:46271-48031 - 692ATGCTTTCTGAAAACACGACTATTCTGATGGCTAACGGTGAAATTAAAGACATCGCAAACGTCACGGCTAACTCTTACGTTATGTGCGCAGATGGCTCCGCTGCCCGCGTCATAAATGTCACACAGGGCTATCAGAAAATCTATAATATACARCAAAAAACCAAACACAGAGCTTTTGAAGGTGAACCTGGTAGGTTAGATCCCAGGCGTAGAACAGTTTATCAGCGTCTTGCATTACAATGTACTGCAGGTCATAAATTGTCAGTCAGGGTCCCTACCAAACCACTGTTGGAAAAAAGTGGTAGAAATGCCACCAAATATAAAGTGAGATGGAGAAATCTGCAGCAATGTCAGA…	ALA	notfound	notfound	GLY	notfound	notfound	notfound	notfound	LEU	notfound	notfound	LEU	notfound	notfound	notfound	3	French Guiana	BDQ	Human
BDR	no	> BDR_YDL227C_HO chromosome4:46271-48031 - 692 ATGCTTTCTGAAAACACGACTATTCTGATGGCTAACGGTGAAATTAAAGACATCGCAAACGTCACGGCTAACTCTTACGTTATGTGCGCAGATGGCTCCGCTGCCCGCGTCATAAATGTCACACAGGGCTATCAGAAAATCTATAATATACAGCAAAAAACCAAAAACAGAGCTTTTGAAGGTGAACCTGGTAGGTTAGATCCCAGGCGTAGAACAGTTTATCAGCGTCTTGCATTACAATGTACTGCAGGTCATAAATTGTCAGTCAGGGTCCCTACCAAACCACTGTTGGAAAAAAGTGGTAGAAATGCCACCAAATATAAAGTGAGATGGAGAAATCTGCAGCAATGTC…	BDR_YDL227C_HO chromosome4:46271-48031 - 692ATGCTTTCTGAAAACACGACTATTCTGATGGCTAACGGTGAAATTAAAGACATCGCAAACGTCACGGCTAACTCTTACGTTATGTGCGCAGATGGCTCCGCTGCCCGCGTCATAAATGTCACACAGGGCTATCAGAAAATCTATAATATACAGCAAAAAACCAAAAACAGAGCTTTTGAAGGTGAACCTGGTAGGTTAGATCCCAGGCGTAGAACAGTTTATCAGCGTCTTGCATTACAATGTACTGCAGGTCATAAATTGTCAGTCAGGGTCCCTACCAAACCACTGTTGGAAAAAAGTGGTAGAAATGCCACCAAATATAAAGTGAGATGGAGAAATCTGCAGCAATGTCAGA…	ALA	notfound	notfound	GLY	notfound	notfound	notfound	notfound	LEU	notfound	notfound	LEU	notfound	notfound	notfound	3	French Guiana	BDR	Human
BDS	no	> BDS_YDL227C_HO chromosome4:46271-48031 - 692 ATGCTTTCTGAAAACACGACTATTCTGATGGCTAACGGTGAAATTAAAGACATCGCAAACGTCACGGCTAACTCTTACGTTATGTGCGCAGATGGCTCCGCTGCCCGCGTCATAAATGTCACACAGGGCTATCAGAAAATCTATAATATACARCAAAAAACCAAACACAGAGCTTTTGAAGGTGAACCTGGTAGGTTAGATCCCAGGCGTAGAACAGTTTATCAGCGTCTTGCATTACAATGTACTGCAGGTCATAAATTGTCAGTCAGGGTCCCTACCAAACCACTGTTGGAAAAAAGTGGTAGAAATGCCACCAAATATAAAGTGAGATGGAGAAATCTGCAGCAATGTC…	BDS_YDL227C_HO chromosome4:46271-48031 - 692ATGCTTTCTGAAAACACGACTATTCTGATGGCTAACGGTGAAATTAAAGACATCGCAAACGTCACGGCTAACTCTTACGTTATGTGCGCAGATGGCTCCGCTGCCCGCGTCATAAATGTCACACAGGGCTATCAGAAAATCTATAATATACARCAAAAAACCAAACACAGAGCTTTTGAAGGTGAACCTGGTAGGTTAGATCCCAGGCGTAGAACAGTTTATCAGCGTCTTGCATTACAATGTACTGCAGGTCATAAATTGTCAGTCAGGGTCCCTACCAAACCACTGTTGGAAAAAAGTGGTAGAAATGCCACCAAATATAAAGTGAGATGGAGAAATCTGCAGCAATGTCAGA…	ALA	notfound	notfound	GLY	notfound	notfound	notfound	notfound	LEU	notfound	notfound	LEU	notfound	notfound	notfound	3	French Guiana	BDS	Human
BDT	no	> BDT_YDL227C_HO chromosome4:46271-48031 - 692 ATGCTTTCTGAAAACACGACTATTCTGATGGCTAACGGTGAAATTAAAGACATCGCAAACGTCACGGCTAACTCTTACGTTATGTGCGCAGATGGCTCCGCTGCCCGCGTCATAAATGTCACACAGGGCTATCAGAAAATCTATAATATACAGCAAAAAACCAAACACAGAGCTTTTGAAGGTGAACCTGGTAGGTTAGATCCCAGGCGTAGAACAGTTTATCAGCGTCTTGCATTACAATGTACTGCAGGTCATAAATTGTCAGTCAGGGTCCCTACCAAACCACTGTTGGAAAAAAGTGGTAGAAATGCCACCAAATATAAAGTGAGATGGAGAAATCTGCAGCAATGTC…	BDT_YDL227C_HO chromosome4:46271-48031 - 692ATGCTTTCTGAAAACACGACTATTCTGATGGCTAACGGTGAAATTAAAGACATCGCAAACGTCACGGCTAACTCTTACGTTATGTGCGCAGATGGCTCCGCTGCCCGCGTCATAAATGTCACACAGGGCTATCAGAAAATCTATAATATACAGCAAAAAACCAAACACAGAGCTTTTGAAGGTGAACCTGGTAGGTTAGATCCCAGGCGTAGAACAGTTTATCAGCGTCTTGCATTACAATGTACTGCAGGTCATAAATTGTCAGTCAGGGTCCCTACCAAACCACTGTTGGAAAAAAGTGGTAGAAATGCCACCAAATATAAAGTGAGATGGAGAAATCTGCAGCAATGTCAGA…	ALA	notfound	notfound	GLY	notfound	notfound	notfound	notfound	LEU	notfound	notfound	LEU	notfound	notfound	notfound	3	French Guiana	BDT	Human
BDV	no	> BDV_YDL227C_HO chromosome4:46271-48031 - 692 ATGCTTTCTGAAAACACGACTATTCTGATGGCTAACGGTGAAATTAAAGACATCGCAAACGTCACGGCTAACTCTTACGTTATGTGCGCAGATGGCTCCGCTGCCCGCGTCATAAATGTCACAAAGGGCTATCAGAAAATCTATAATATACAGCAAAAAACCAAACACAGAGCTTTTGAAGGTGAACCTGGTAGGTTAGATCCCAGGCGTAGAACAGTTTATCAGCGTCTTGCATTACAATGTACTGCAGGTCATAAATTGTCAGTCAGGGTCCCTACCAAACCACTGTTGGAAAAAAGTGGTAGAAATGCCACCAAATATAAAGTGAGATGGAGAAATCTGCAGCAATGTC…	BDV_YDL227C_HO chromosome4:46271-48031 - 692ATGCTTTCTGAAAACACGACTATTCTGATGGCTAACGGTGAAATTAAAGACATCGCAAACGTCACGGCTAACTCTTACGTTATGTGCGCAGATGGCTCCGCTGCCCGCGTCATAAATGTCACAAAGGGCTATCAGAAAATCTATAATATACAGCAAAAAACCAAACACAGAGCTTTTGAAGGTGAACCTGGTAGGTTAGATCCCAGGCGTAGAACAGTTTATCAGCGTCTTGCATTACAATGTACTGCAGGTCATAAATTGTCAGTCAGGGTCCCTACCAAACCACTGTTGGAAAAAAGTGGTAGAAATGCCACCAAATATAAAGTGAGATGGAGAAATCTGCAGCAATGTCAGA…	ALA	notfound	notfound	GLY	notfound	notfound	notfound	notfound	LEU	notfound	notfound	LEU	notfound	notfound	notfound	3	French Guiana	BDV	Human
BEA	no	> BEA_YDL227C_HO chromosome4:46271-48031 - 692 ATGCTTTCTGAAAACACGACTATTCTGATGGCTAACGGTGAAATTAAAGACATCGCAAACGTCACGGCTAACTCTTACGTTATGTGCGCAGATGGCTCCGCTGCCCGCGTCATAAATGTCACACAGGGCTATCAGAAAATCTATAATATACAACAAAAAACCAAACACAGAGCTTTTGAAGGTGAACCTGGTAGGTTAGATCCCAGGCGTAGAACAGTTTATCAGCGTCTTGCATTACAATGTACTGCAGGTCATAAATTGTCAGTCAGGGTCCCTACCAAACCACTGTTGGAAAAAAGTGGTAGAAATGCCACCAAATATAAAGTGAGATGGAGAAATCTGCAGCAATGTC…	BEA_YDL227C_HO chromosome4:46271-48031 - 692ATGCTTTCTGAAAACACGACTATTCTGATGGCTAACGGTGAAATTAAAGACATCGCAAACGTCACGGCTAACTCTTACGTTATGTGCGCAGATGGCTCCGCTGCCCGCGTCATAAATGTCACACAGGGCTATCAGAAAATCTATAATATACAACAAAAAACCAAACACAGAGCTTTTGAAGGTGAACCTGGTAGGTTAGATCCCAGGCGTAGAACAGTTTATCAGCGTCTTGCATTACAATGTACTGCAGGTCATAAATTGTCAGTCAGGGTCCCTACCAAACCACTGTTGGAAAAAAGTGGTAGAAATGCCACCAAATATAAAGTGAGATGGAGAAATCTGCAGCAATGTCAGA…	ALA	notfound	notfound	GLY	notfound	notfound	notfound	notfound	LEU	notfound	notfound	LEU	notfound	notfound	notfound	3	French Guiana	BEA	Human
BEB	no	> BEB_YDL227C_HO chromosome4:46271-48031 - 692 ATGCTTTCTGAAAACACGACTATTCTGATGGCTAACGGTGAAATTAAAGACATCGCAAACGTCACGGCTAACTCTTACGTTATGTGCGCAGATGGCTCCGCTGCCCGCGTCATAAATGTCACACAGGGCTATCAGAAAATCTATAATATACAACAAAAAACCAAACACAGAGCTTTTGAAGGTGAACCTGGTAGGTTAGATCCCAGGCGTAGAACAGTTTATCAGCGTCTTGCATTACAATGTACTGCAGGTCATAAATTGTCAGTCAGGGTCCCTACCAAACCACTGTTGGAAAAAAGTGGTAGAAATGCCACCAAATATAAAGTGAGATGGAGAAATCTGCAGCAATGTC…	BEB_YDL227C_HO chromosome4:46271-48031 - 692ATGCTTTCTGAAAACACGACTATTCTGATGGCTAACGGTGAAATTAAAGACATCGCAAACGTCACGGCTAACTCTTACGTTATGTGCGCAGATGGCTCCGCTGCCCGCGTCATAAATGTCACACAGGGCTATCAGAAAATCTATAATATACAACAAAAAACCAAACACAGAGCTTTTGAAGGTGAACCTGGTAGGTTAGATCCCAGGCGTAGAACAGTTTATCAGCGTCTTGCATTACAATGTACTGCAGGTCATAAATTGTCAGTCAGGGTCCCTACCAAACCACTGTTGGAAAAAAGTGGTAGAAATGCCACCAAATATAAAGTGAGATGGAGAAATCTGCAGCAATGTCAGA…	ALA	notfound	notfound	GLY	notfound	notfound	notfound	notfound	LEU	notfound	notfound	LEU	notfound	notfound	notfound	3	French Guiana	BEB	Human
BEC	no	> BEC_YDL227C_HO chromosome4:46271-48031 - 692 ATGCTTTCTGAAAACACGACTATTCTGATGGCTAACGGTGAAATTAAAGACATCGCAAACGTCACGGCTAACTCTTACGTTATGTGCGCAGATGGCTCCGCTGCCCGCGTCATAAATGTCACAAAGGGCTATCAGAAAATCTATAATATACAGCAAAAAACCAAACACAGAGCTTTTGAAGGTGAACCTGGTAGGTTAGATCCCAGGCGTAGAACAGTTTATCAGCGTCTTGCATTACAATGTACTGCAGGTCATAAATTGTCAGTCAGGGTCCCTACCAAACCACTGTTGGAAAAAAGTGGTAGAAATGCCACCAAATATAAAGTGAGATGGAGAAATCTGCAGCAATGTC…	BEC_YDL227C_HO chromosome4:46271-48031 - 692ATGCTTTCTGAAAACACGACTATTCTGATGGCTAACGGTGAAATTAAAGACATCGCAAACGTCACGGCTAACTCTTACGTTATGTGCGCAGATGGCTCCGCTGCCCGCGTCATAAATGTCACAAAGGGCTATCAGAAAATCTATAATATACAGCAAAAAACCAAACACAGAGCTTTTGAAGGTGAACCTGGTAGGTTAGATCCCAGGCGTAGAACAGTTTATCAGCGTCTTGCATTACAATGTACTGCAGGTCATAAATTGTCAGTCAGGGTCCCTACCAAACCACTGTTGGAAAAAAGTGGTAGAAATGCCACCAAATATAAAGTGAGATGGAGAAATCTGCAGCAATGTCAGA…	ALA	notfound	notfound	GLY	notfound	notfound	notfound	notfound	LEU	notfound	notfound	LEU	notfound	notfound	notfound	3	French Guiana	BEC	Human
BED	no	> BED_YDL227C_HO chromosome4:46271-48031 - 692 ATGCTTTCTGAAAACACGACTATTCTGATGGCTAACGGTGAAATTAAAGACATCGCAAACGTCACGGCTAACTCTTACGTTATGTGCGCAGATGGCTCCGCTGCCCGCGTCATAAATGTCACACAGGGCTATCAGAAAATCTATAATATACAGCAAAAAACCAAACACAGAGCTTTTGAAGGTGARCCTGGTAGGTTAGATCCCAGGCGTAGAACAGTTTATCAGCGTCTTGCATTACAATGTACTGCAGGTCATAAATTGTCAGTCAGGGTCCCTACCAAACCACTGTTGGAAAAAAGTGGTAGAAATGCCACCAAATATAAAGTGAGATGGAGAAATCTGCAGCAATGTC…	BED_YDL227C_HO chromosome4:46271-48031 - 692ATGCTTTCTGAAAACACGACTATTCTGATGGCTAACGGTGAAATTAAAGACATCGCAAACGTCACGGCTAACTCTTACGTTATGTGCGCAGATGGCTCCGCTGCCCGCGTCATAAATGTCACACAGGGCTATCAGAAAATCTATAATATACAGCAAAAAACCAAACACAGAGCTTTTGAAGGTGARCCTGGTAGGTTAGATCCCAGGCGTAGAACAGTTTATCAGCGTCTTGCATTACAATGTACTGCAGGTCATAAATTGTCAGTCAGGGTCCCTACCAAACCACTGTTGGAAAAAAGTGGTAGAAATGCCACCAAATATAAAGTGAGATGGAGAAATCTGCAGCAATGTCAGA…	ALA	notfound	notfound	GLY	notfound	notfound	notfound	notfound	LEU	notfound	notfound	LEU	notfound	notfound	notfound	3	French Guiana	BED	Human
BEE	no	> BEE_YDL227C_HO chromosome4:46271-48031 - 692 ATGCTTTCTGAAAACACGACTATTCTGATGGCTAACGGTGAAATTAAAGACATCGCAAACGTCACGGCTAACTCTTACGTTATGTGCGCAGATGGCTCCGCTGCCCGCGTCATAAATGTCACACAGGGCTATCAGAAAATCTATAATATACAACAAAAAACCAAACACAGAGCTTTTGAAGGTGAACCTGGTAGGTTAGATCCCAGGCGTAGAACAGTTTATCAGCGTCTTGCATTACAATGTACTGCAGGTCATAAATTGTCAGTCAGGGTCCCTACCAAACCACTGTTGGAAAAAAGTGGTAGAAATGCCACCAAATATAAAGTGAGATGGAGAAATCTGCAGCAATGTC…	BEE_YDL227C_HO chromosome4:46271-48031 - 692ATGCTTTCTGAAAACACGACTATTCTGATGGCTAACGGTGAAATTAAAGACATCGCAAACGTCACGGCTAACTCTTACGTTATGTGCGCAGATGGCTCCGCTGCCCGCGTCATAAATGTCACACAGGGCTATCAGAAAATCTATAATATACAACAAAAAACCAAACACAGAGCTTTTGAAGGTGAACCTGGTAGGTTAGATCCCAGGCGTAGAACAGTTTATCAGCGTCTTGCATTACAATGTACTGCAGGTCATAAATTGTCAGTCAGGGTCCCTACCAAACCACTGTTGGAAAAAAGTGGTAGAAATGCCACCAAATATAAAGTGAGATGGAGAAATCTGCAGCAATGTCAGA…	ALA	notfound	notfound	GLY	notfound	notfound	notfound	notfound	LEU	notfound	notfound	LEU	notfound	notfound	notfound	3	French Guiana	BEE	Human
BME	no	> BME_YDL227C_HO chromosome4:46271-48031 - 692 ATGCTTTCTGAAAACACGACTATTCTGATGGCTAACGGTGAAATTAAAGACATCGCAAACGTCACGGCTAACTCTTACGTTATGTGCGCAGATGGCTCCGCTGCCCGCGTCATAAATGTCACACAGGGCTATCAGAAAATCTATAATATACAGCAAAAAACCAAACACAGAGCTTTTGAAGGTGAACCTGGTAGGTTAGATCCCAGGCGTAGAACAGTTTATCAGCGTCTTGCATTACAATGTACTGCAGGTCATAAATTGTCAGTCAGGGTCCCTACCAAACCACTGTTGGAAAAAARTGGTAGAAATGCCACCAAATATAAAGTGAGATGGAGAAATCTGCAGCAATGTC…	BME_YDL227C_HO chromosome4:46271-48031 - 692ATGCTTTCTGAAAACACGACTATTCTGATGGCTAACGGTGAAATTAAAGACATCGCAAACGTCACGGCTAACTCTTACGTTATGTGCGCAGATGGCTCCGCTGCCCGCGTCATAAATGTCACACAGGGCTATCAGAAAATCTATAATATACAGCAAAAAACCAAACACAGAGCTTTTGAAGGTGAACCTGGTAGGTTAGATCCCAGGCGTAGAACAGTTTATCAGCGTCTTGCATTACAATGTACTGCAGGTCATAAATTGTCAGTCAGGGTCCCTACCAAACCACTGTTGGAAAAAARTGGTAGAAATGCCACCAAATATAAAGTGAGATGGAGAAATCTGCAGCAATGTCAGA…	ALA	notfound	notfound	GLY	notfound	notfound	notfound	notfound	LEU	notfound	notfound	LEU	notfound	notfound	notfound	3	RVI Newcastle, UK	BME	Human
ARN	no	> ARN_YDL227C_HO chromosome4:46271-48031 - 692 ATGCTTTCTGAAAACACGACTATTCTGATGGCTAACGGTGAAATTAAAGACATCGCAAACGTCACGGCTAACTCTTACGTTATGTGCGCAGATAGCTCCGCTGCCCGCGTCATAAATGTCACACAGGGCTATCAGAAAATCTATAATATACAGCAAAAAACCAAACACAGAGCTTTTGAAGGTGAACCTGGTAGGTTAGATCCCAGGCGTAGAACAGTTTATCAGCGTCTTGCATTACAATGTACTGCAGGTCATAAATTGTCAGTCAGGGTCCCTACCAAACCACTGTTGGAAAAAAGTGGTAGAAATGCCACCAAATATAAAGTGAGATGGAGAAATCTGCAGCAATGTC…	ARN_YDL227C_HO chromosome4:46271-48031 - 692ATGCTTTCTGAAAACACGACTATTCTGATGGCTAACGGTGAAATTAAAGACATCGCAAACGTCACGGCTAACTCTTACGTTATGTGCGCAGATAGCTCCGCTGCCCGCGTCATAAATGTCACACAGGGCTATCAGAAAATCTATAATATACAGCAAAAAACCAAACACAGAGCTTTTGAAGGTGAACCTGGTAGGTTAGATCCCAGGCGTAGAACAGTTTATCAGCGTCTTGCATTACAATGTACTGCAGGTCATAAATTGTCAGTCAGGGTCCCTACCAAACCACTGTTGGAAAAAAGTGGTAGAAATGCCACCAAATATAAAGTGAGATGGAGAAATCTGCAGCAATGTCAGA…	ALA	notfound	notfound	GLY	notfound	notfound	notfound	notfound	LEU	notfound	notfound	LEU	notfound	notfound	notfound	3	Netherlands	ARN	Human, clinical
ATD	no	> ATD_YDL227C_HO chromosome4:46271-48031 - 692 ATGCTTTCTGAAAACACGACTGTTCTGATGGCTAACGGTGAAATTAAAGACATCGCAAACGTCACGGCTAACTCTTACGTTATGTGCGCAGATGGCTCCGCTGCCCGCGTCATAAATGTCACACAGGGCTATCAGAAAATCTATAATATACAGCAAAAAACCAAACACAGAGCTTTTGAAGGTGAACCTGGTAGGTTAGATCCCAGGCGTAGAACAGTTTATCAGCGTCTTGCATTACAATGTACTGCAGGTCATAAATTGTCAGTCAGGGTCCCTACCAAACCACTGTTGGAAAAAAGTGGTAGAAATGCCACCAAATATAAAGTGAGATGGAGAAATCTGCAGCAATGTC…	ATD_YDL227C_HO chromosome4:46271-48031 - 692ATGCTTTCTGAAAACACGACTGTTCTGATGGCTAACGGTGAAATTAAAGACATCGCAAACGTCACGGCTAACTCTTACGTTATGTGCGCAGATGGCTCCGCTGCCCGCGTCATAAATGTCACACAGGGCTATCAGAAAATCTATAATATACAGCAAAAAACCAAACACAGAGCTTTTGAAGGTGAACCTGGTAGGTTAGATCCCAGGCGTAGAACAGTTTATCAGCGTCTTGCATTACAATGTACTGCAGGTCATAAATTGTCAGTCAGGGTCCCTACCAAACCACTGTTGGAAAAAAGTGGTAGAAATGCCACCAAATATAAAGTGAGATGGAGAAATCTGCAGCAATGTCAGA…	ALA	notfound	notfound	GLY	notfound	notfound	notfound	notfound	LEU	notfound	notfound	LEU	notfound	notfound	notfound	3	NA	ATD	Human, clinical
CKR	no	> CKR_YDL227C_HO chromosome4:46271-48031 - 692 ATGCTTTCTGAAAACACGACTATTCTGATGGCTAACGGTGAAATTAAAGACATCGCAAACGTCACGGCTAACTCTTACGTTATGTGCGCAGATGGCTCCGCTGCCCGCGTCATAAATGTCACACAGGGCTATCAGAAAATCTATAATATACAGCAAAAAACCAAACACAGAGCTTTTGAAGGTGAACCTGGTAGGTTAGATCCCAGGCGTAGAACAGTTTATCAGCGTCTTGCATTACAATGTACTGCAGGTCATAAATTGTCAGTCAGGGTCCCTACCAAACCACTGTTGGAAAAAAGTGGTAGAAATGCCACCAAATATAAAGTGAGATGGAGAAATCTGCAGCAATGTC…	CKR_YDL227C_HO chromosome4:46271-48031 - 692ATGCTTTCTGAAAACACGACTATTCTGATGGCTAACGGTGAAATTAAAGACATCGCAAACGTCACGGCTAACTCTTACGTTATGTGCGCAGATGGCTCCGCTGCCCGCGTCATAAATGTCACACAGGGCTATCAGAAAATCTATAATATACAGCAAAAAACCAAACACAGAGCTTTTGAAGGTGAACCTGGTAGGTTAGATCCCAGGCGTAGAACAGTTTATCAGCGTCTTGCATTACAATGTACTGCAGGTCATAAATTGTCAGTCAGGGTCCCTACCAAACCACTGTTGGAAAAAAGTGGTAGAAATGCCACCAAATATAAAGTGAGATGGAGAAATCTGCAGCAATGTCAGA…	ALA	notfound	notfound	GLY	notfound	notfound	notfound	notfound	LEU	notfound	notfound	LEU	notfound	notfound	notfound	3	France	CKR	Human, clinical
CKV	no	> CKV_YDL227C_HO chromosome4:46271-48031 - 692 ATGCTTTCTGAAAACACGACTATTCTGATGGCTAACGGTGAAATTAAAGACATCGCAAACGTCACGGCTAACTCTTACGTTATGTGCGCAGATGGCTCCGCTGCCCGCGTCATAAATGTCACACAGGGCTATCAGAAAATCTATAATATACAGCAAAAAACCAAACACAGAGCTTTTGAAGGTGAACCTGGTAGGTTAGATCCCAGGCGTAGAACAGTTTATCAGCGTCTTGCATTACAATGTACTGCAGGTCATAAATTGTCAGTCAGGGTCCCTACCAAACCACTGTTGGMAAAAAGTGGTAGAAATGCCACCAAATATAAAGTGAGATGGAGAAATCTGCAGCAATGTC…	CKV_YDL227C_HO chromosome4:46271-48031 - 692ATGCTTTCTGAAAACACGACTATTCTGATGGCTAACGGTGAAATTAAAGACATCGCAAACGTCACGGCTAACTCTTACGTTATGTGCGCAGATGGCTCCGCTGCCCGCGTCATAAATGTCACACAGGGCTATCAGAAAATCTATAATATACAGCAAAAAACCAAACACAGAGCTTTTGAAGGTGAACCTGGTAGGTTAGATCCCAGGCGTAGAACAGTTTATCAGCGTCTTGCATTACAATGTACTGCAGGTCATAAATTGTCAGTCAGGGTCCCTACCAAACCACTGTTGGMAAAAAGTGGTAGAAATGCCACCAAATATAAAGTGAGATGGAGAAATCTGCAGCAATGTCAGA…	ALA	notfound	notfound	GLY	notfound	notfound	notfound	notfound	LEU	notfound	notfound	LEU	notfound	notfound	notfound	3	France	CKV	Human, clinical
SACE_YAR	no	> SACE_YAR_YDL227C_HO chromosome4:46271-48031 - 692 ATGCTTTCTGAAAACACGACTATTCTGATGGCTAACGGTGAAATTAAAGACATCGCAAACGTCACGGCTAACTCTTACGTTATGTGCGCAGATGGCTCCGCTGCCCGCGTCATAAATGTCACACAGGGCTATCAGAAAATCTATAATATACAGCAAAAAACCAAACACAGAGCTTTTGAAGGTGAACCTGGTAGGTTAGATCCCAGGCGTAGAACAGTTTATCAGCGTCTTGCATTACAATGTACTGCAGGTCATAAATTGTCAGTCAGGGTCCCTACCAAACCATTGTTGGAAAAAAGTGGTAGAAATGCCACCAAATATAAAGTGAGATGGAGAAATCTGCAGCA…	SACE_YAR_YDL227C_HO chromosome4:46271-48031 - 692ATGCTTTCTGAAAACACGACTATTCTGATGGCTAACGGTGAAATTAAAGACATCGCAAACGTCACGGCTAACTCTTACGTTATGTGCGCAGATGGCTCCGCTGCCCGCGTCATAAATGTCACACAGGGCTATCAGAAAATCTATAATATACAGCAAAAAACCAAACACAGAGCTTTTGAAGGTGAACCTGGTAGGTTAGATCCCAGGCGTAGAACAGTTTATCAGCGTCTTGCATTACAATGTACTGCAGGTCATAAATTGTCAGTCAGGGTCCCTACCAAACCATTGTTGGAAAAAAGTGGTAGAAATGCCACCAAATATAAAGTGAGATGGAGAAATCTGCAGCAATG…	ALA	notfound	notfound	GLY	notfound	notfound	notfound	notfound	LEU	notfound	notfound	LEU	notfound	notfound	notfound	3	California, USA	SACE_YAR	Human, clinical
SACE_YAT	no	> SACE_YAT_YDL227C_HO chromosome4:46271-48031 - 692 ATGCTTTCTGAAAACACGACTATTCTGATGGCTAACGGTGAAATTAAAGACATCGCAAACGTCACGGCTAACTCTTACGTTATGTGCGCAGATGGCTCCGCTGCCCGCGTCATAAATGTCACACAGGGCTATCAGAAAATCTATAATATACAGCAAAAAACCAAACACAGAGCTTTTGAAGGTGAACCTGGTAGGTTAGATCCCAGGCGTAGAACAGTTTATCAGCGTCTTGCATTACAATGTACTGCAGGTCATAAATTGTCAGTCAGGGTCCCTACCAAACCACTGTTGGAAAAAAGTGGTAGAAATGCCACCAAATATAAAGTGAGATGGAGAAATCTGCAGCA…	SACE_YAT_YDL227C_HO chromosome4:46271-48031 - 692ATGCTTTCTGAAAACACGACTATTCTGATGGCTAACGGTGAAATTAAAGACATCGCAAACGTCACGGCTAACTCTTACGTTATGTGCGCAGATGGCTCCGCTGCCCGCGTCATAAATGTCACACAGGGCTATCAGAAAATCTATAATATACAGCAAAAAACCAAACACAGAGCTTTTGAAGGTGAACCTGGTAGGTTAGATCCCAGGCGTAGAACAGTTTATCAGCGTCTTGCATTACAATGTACTGCAGGTCATAAATTGTCAGTCAGGGTCCCTACCAAACCACTGTTGGAAAAAAGTGGTAGAAATGCCACCAAATATAAAGTGAGATGGAGAAATCTGCAGCAATG…	ALA	notfound	notfound	GLY	notfound	notfound	notfound	notfound	LEU	notfound	notfound	LEU	notfound	notfound	notfound	3	California, USA	SACE_YAT	Human, clinical
SACE_YAW	no	> SACE_YAW_YDL227C_HO chromosome4:46271-48031 - 692 ATGCTTTCTGAAAACACGACTATTCTGATGGCTAACGGTGAAATTAAAGACATCGCAAACGTCACGGCTAACTCTTACGTTATGTGCGCAGATGGCTCCGCTGCCCGCGTCATAAATGTCACACAGGGCTATCAGAAAATCTATAATATACAGCAAAAAACCAAACACAGAGCTTTTGAAGGTGAACCTGGTAGGTTAGATCCCAGGCGTAGAACAGTTTATCAGCGTCTTGCATTACAATGTACTGCAGGTCATAAATTGTCAGTCAGGGTCCCTACCAAACCACTGTTGGAAAAAAGTGGTAGAAATGCCACCAAATATAAAGTGAGATGGAGAAATCTGCAGCA…	SACE_YAW_YDL227C_HO chromosome4:46271-48031 - 692ATGCTTTCTGAAAACACGACTATTCTGATGGCTAACGGTGAAATTAAAGACATCGCAAACGTCACGGCTAACTCTTACGTTATGTGCGCAGATGGCTCCGCTGCCCGCGTCATAAATGTCACACAGGGCTATCAGAAAATCTATAATATACAGCAAAAAACCAAACACAGAGCTTTTGAAGGTGAACCTGGTAGGTTAGATCCCAGGCGTAGAACAGTTTATCAGCGTCTTGCATTACAATGTACTGCAGGTCATAAATTGTCAGTCAGGGTCCCTACCAAACCACTGTTGGAAAAAAGTGGTAGAAATGCCACCAAATATAAAGTGAGATGGAGAAATCTGCAGCAATG…	ALA	notfound	notfound	GLY	notfound	notfound	notfound	notfound	LEU	notfound	notfound	LEU	notfound	notfound	notfound	3	Texas, USA	SACE_YAW	Human, clinical
SACE_YBJ	no	> SACE_YBJ_YDL227C_HO chromosome4:46271-48031 - 692 ATGCTTTCTGAAAACACGACTGTTCTGATGGCTAACGGTGAAATTAAAGACATCGCAAACGTCACGGCTAACTCTTACGTTATGTGCGCAGATGGCTCCGCTGCCCGCGTCATAAATGTCACACAGGGCTATCAGAAAATCTATAATATACAGCAAAAAACCAAACACAGAGCTTTTGAAGGTGAACCTGGTAGGTTAGATCCCAGGCGTAGAACAGTTTATCAGCGTCTTGCATTACAATGTACTGCAGGTCATAAATTGTCAGTCAGGGTCCCTACCAAACCACTGTTGGAAAAAAGTGGTAGAAATGCCACCAAATATAAAGTGAGATGGAGAAATCTGCAGCA…	SACE_YBJ_YDL227C_HO chromosome4:46271-48031 - 692ATGCTTTCTGAAAACACGACTGTTCTGATGGCTAACGGTGAAATTAAAGACATCGCAAACGTCACGGCTAACTCTTACGTTATGTGCGCAGATGGCTCCGCTGCCCGCGTCATAAATGTCACACAGGGCTATCAGAAAATCTATAATATACAGCAAAAAACCAAACACAGAGCTTTTGAAGGTGAACCTGGTAGGTTAGATCCCAGGCGTAGAACAGTTTATCAGCGTCTTGCATTACAATGTACTGCAGGTCATAAATTGTCAGTCAGGGTCCCTACCAAACCACTGTTGGAAAAAAGTGGTAGAAATGCCACCAAATATAAAGTGAGATGGAGAAATCTGCAGCAATG…	ALA	notfound	notfound	GLY	notfound	notfound	notfound	notfound	LEU	notfound	notfound	LEU	notfound	notfound	notfound	3	Michigan, USA	SACE_YBJ	Human, clinical
SACE_YBT	no	> SACE_YBT_YDL227C_HO chromosome4:46271-48031 - 692 ATGCTTTCTGAAAACACGACTATTCTGATGGCTAACGGTGAAATTAAAGACATCGCAAACGTCACGGCTAACTCTTACGTTATGTGCGCAGATGGCTCCGCTGCCCGCGTCATAAATGTCACACAGGGCTATCAGAAAATCTATAATATACAGCAAAAAACCAAACACAGAGCTTTTGAAGGTGAACCTGGTAGGTTAGATCCCAGGCGTAGAACAGTTTATCAGCGTCTTGCATTACAATGTACTGCAGGTCATAAATTGTCAGTCAGGGTCCCTACCAAACCACTGTTGGAAAAAAGTGGTAGAAATGCCACCAAATATAAAGTGAGATGGAGAAATCTGCAGCA…	SACE_YBT_YDL227C_HO chromosome4:46271-48031 - 692ATGCTTTCTGAAAACACGACTATTCTGATGGCTAACGGTGAAATTAAAGACATCGCAAACGTCACGGCTAACTCTTACGTTATGTGCGCAGATGGCTCCGCTGCCCGCGTCATAAATGTCACACAGGGCTATCAGAAAATCTATAATATACAGCAAAAAACCAAACACAGAGCTTTTGAAGGTGAACCTGGTAGGTTAGATCCCAGGCGTAGAACAGTTTATCAGCGTCTTGCATTACAATGTACTGCAGGTCATAAATTGTCAGTCAGGGTCCCTACCAAACCACTGTTGGAAAAAAGTGGTAGAAATGCCACCAAATATAAAGTGAGATGGAGAAATCTGCAGCAATG…	ALA	notfound	notfound	GLY	notfound	notfound	notfound	notfound	LEU	notfound	notfound	LEU	notfound	notfound	notfound	3	Texas, USA	SACE_YBT	Human, clinical
BEG	no	> BEG_YDL227C_HO chromosome4:46271-48031 - 692 ATGCTTTCTGAAAACACGACTATTCTGATGGCTAACGGTGAAATTAAAGACATCGCAAACGTCACGGCTAACTCTTACGTTATGTGCGCAGATGGCTCCGCTGCCCGCGTCATAAATGTCACACAGGGCTATCAGAAAATCTATAATATACAGCAAAAAACCAAACACAGAGCTTTTGAAGGTGAACCTGGTAGGTTAGATCCCAGGCGTAGAACAGTTTATCAGCGTCTTGCATTACAATGTACTGCAGGTCATAAATTGTCAGTCAGGGTCCCTACCAAACCACTGTTGGAAAAAAGTGGTAGAAATGCCACCAAATATAAAGTGAGATGGAGAAATCTGCAGCAATGTC…	BEG_YDL227C_HO chromosome4:46271-48031 - 692ATGCTTTCTGAAAACACGACTATTCTGATGGCTAACGGTGAAATTAAAGACATCGCAAACGTCACGGCTAACTCTTACGTTATGTGCGCAGATGGCTCCGCTGCCCGCGTCATAAATGTCACACAGGGCTATCAGAAAATCTATAATATACAGCAAAAAACCAAACACAGAGCTTTTGAAGGTGAACCTGGTAGGTTAGATCCCAGGCGTAGAACAGTTTATCAGCGTCTTGCATTACAATGTACTGCAGGTCATAAATTGTCAGTCAGGGTCCCTACCAAACCACTGTTGGAAAAAAGTGGTAGAAATGCCACCAAATATAAAGTGAGATGGAGAAATCTGCAGCAATGTCAGA…	ALA	notfound	notfound	GLY	notfound	notfound	notfound	notfound	LEU	notfound	notfound	LEU	notfound	notfound	notfound	3	Japan	BEG	Industrial
SACE_YCK	no	> SACE_YCK_YDL227C_HO chromosome4:46271-48031 - 692 ATGCTTTCTGAAAACACGACTATTCTGATGGCTAACGGTGAAATTAAAGACATCGCAAACGTCACGGCTAACTCTTACGTTATGTGCGCAGATGGCTCCGCTGCCCGCGTCATAAATGTCACACAGGGCTATCAGAAAATCTATAATATACAGCAAAAAACCAAACACAGAGCTTTTGAAGGTGAACCTGGTAGGTTAGATCCCAGGCGTAGAACAGTTTATCAGCGTCTTGCATTACAATGTACTGCAGGTCATAAATTGTCAGTCAGGGTCCCTACCAAACCACTGTTGGAAAAAAGTGGTAGAAATGCCACCAAATATAAAGTGAGATGGAGAAATCTGCAGCA…	SACE_YCK_YDL227C_HO chromosome4:46271-48031 - 692ATGCTTTCTGAAAACACGACTATTCTGATGGCTAACGGTGAAATTAAAGACATCGCAAACGTCACGGCTAACTCTTACGTTATGTGCGCAGATGGCTCCGCTGCCCGCGTCATAAATGTCACACAGGGCTATCAGAAAATCTATAATATACAGCAAAAAACCAAACACAGAGCTTTTGAAGGTGAACCTGGTAGGTTAGATCCCAGGCGTAGAACAGTTTATCAGCGTCTTGCATTACAATGTACTGCAGGTCATAAATTGTCAGTCAGGGTCCCTACCAAACCACTGTTGGAAAAAAGTGGTAGAAATGCCACCAAATATAAAGTGAGATGGAGAAATCTGCAGCAATG…	ALA	notfound	notfound	GLY	notfound	notfound	notfound	notfound	LEU	notfound	notfound	LEU	notfound	notfound	notfound	3	Thailand	SACE_YCK	Industrial
SACE_YDK	no	> SACE_YDK_YDL227C_HO chromosome4:46271-48031 - 692 ATGCTTTCTGAAAACACGACTATTCTGATGGCTAACGGTGAAATTAAAGACATCGCAAACGTCACGGCTAACTCTTACGTTATGTGCGCAGATGGCTCCGCTGCCCGCGTCATAAATGTCACACAGGGCTATCAGAAAATCTATAATATACAGCAAAAAACCAAACACAGAGCTTTTGAAGGTGAACCTGGTAGGTTAGATCCCAGGCGTAGAACAGTTTATCAGCGTCTTGCATTACAATGTACTGCAGGTCATAAATTGTCAGTCAGGGTCCCTACCAAACCACTGTTGGAAAAAAGTGGTAGAAATGCCACCAAATATAAAGTGAGATGGAGAAATCTGCAGCA…	SACE_YDK_YDL227C_HO chromosome4:46271-48031 - 692ATGCTTTCTGAAAACACGACTATTCTGATGGCTAACGGTGAAATTAAAGACATCGCAAACGTCACGGCTAACTCTTACGTTATGTGCGCAGATGGCTCCGCTGCCCGCGTCATAAATGTCACACAGGGCTATCAGAAAATCTATAATATACAGCAAAAAACCAAACACAGAGCTTTTGAAGGTGAACCTGGTAGGTTAGATCCCAGGCGTAGAACAGTTTATCAGCGTCTTGCATTACAATGTACTGCAGGTCATAAATTGTCAGTCAGGGTCCCTACCAAACCACTGTTGGAAAAAAGTGGTAGAAATGCCACCAAATATAAAGTGAGATGGAGAAATCTGCAGCAATG…	ALA	notfound	notfound	GLY	notfound	notfound	notfound	notfound	LEU	notfound	notfound	LEU	notfound	notfound	notfound	3	Thailand	SACE_YDK	Industrial
AKQ	no	> AKQ_YDL227C_HO chromosome4:46271-48031 - 692 ATGCTTTCTGAAAACACGACTATTCTGATGGCTAACGGTGAAATTAAAGACATCGCAAACGTCACGGCTAACTCTTACGTTATGTGCGCAGATGGCTCCGCTGCCCGCGTCATAAATGTCACACAGGGCTATCAGAAAATCTATAATATACAGCAAAAAACCAAACACAGAGCTTTTGAAGGTGAACCTGGTAGGTTAGATCCCAGGCGTAGAACAGTTTATCAGCGTCTTGCATTACAATGTACTGCAGGTCATAAATTGTCAGTCAGGGTCCCTACCAAACCACTGTTGGAAAAAAGTGGTAGAAATGCCACCAAATATAAAGTGAGATGGAGAAATCTGCAGCAATGTC…	AKQ_YDL227C_HO chromosome4:46271-48031 - 692ATGCTTTCTGAAAACACGACTATTCTGATGGCTAACGGTGAAATTAAAGACATCGCAAACGTCACGGCTAACTCTTACGTTATGTGCGCAGATGGCTCCGCTGCCCGCGTCATAAATGTCACACAGGGCTATCAGAAAATCTATAATATACAGCAAAAAACCAAACACAGAGCTTTTGAAGGTGAACCTGGTAGGTTAGATCCCAGGCGTAGAACAGTTTATCAGCGTCTTGCATTACAATGTACTGCAGGTCATAAATTGTCAGTCAGGGTCCCTACCAAACCACTGTTGGAAAAAAGTGGTAGAAATGCCACCAAATATAAAGTGAGATGGAGAAATCTGCAGCAATGTCAGA…	ALA	notfound	notfound	GLY	notfound	notfound	notfound	notfound	LEU	notfound	notfound	LEU	notfound	notfound	notfound	3	Los Rios, Ecuador	AKQ	Insect
AMB	no	> AMB_YDL227C_HO chromosome4:46271-48031 - 692 ATGCTTTCTGAAAACACGACTATTCTGATGGCTAACGGTGAAATTAAAGACATCGCAAACGTCACGGCTAACTCTTACGTTATGTGCGCAGATGGCTCCGCTGCCCGCGTCATAAATGTCACACAGGGCTATCAGAAAATCTATAATATACAGCAAAAAACCAAACACAGAGCTTTTGAAGGTGAACCTGGTAGGTTAGATCCCAGGCGTAGAACAGTTTATCAGCGTCTTGCATTACAATGTACTGCAGGTCATAAATTGTCAGTCAGGGTCCCTACCAAACCACTGTTGGAAAAAAGTGGTAGAAATGCCACCAAATATAAAGTGAGATGGAGAAATCTGCAGCAATGTC…	AMB_YDL227C_HO chromosome4:46271-48031 - 692ATGCTTTCTGAAAACACGACTATTCTGATGGCTAACGGTGAAATTAAAGACATCGCAAACGTCACGGCTAACTCTTACGTTATGTGCGCAGATGGCTCCGCTGCCCGCGTCATAAATGTCACACAGGGCTATCAGAAAATCTATAATATACAGCAAAAAACCAAACACAGAGCTTTTGAAGGTGAACCTGGTAGGTTAGATCCCAGGCGTAGAACAGTTTATCAGCGTCTTGCATTACAATGTACTGCAGGTCATAAATTGTCAGTCAGGGTCCCTACCAAACCACTGTTGGAAAAAAGTGGTAGAAATGCCACCAAATATAAAGTGAGATGGAGAAATCTGCAGCAATGTCAGA…	ALA	notfound	notfound	GLY	notfound	notfound	notfound	notfound	LEU	notfound	notfound	LEU	notfound	notfound	notfound	3	Louisiana, USA	AMB	Insect
AMC	no	> AMC_YDL227C_HO chromosome4:46271-48031 - 692 ATGCTTTCTGAAAACACGACTATTCTGATGGCTAACGGTGAAATTAAAGACATCGCAAACGTCACGGCTAACTCTTACGTTATGTGCGCAGATGGCTCCGCTGCCCGCGTCATAAATGTCACACAGGGCTATCAGAAAATCTATAATATACAGCAAAAAACCAAACACAGAGCTTTTGAAGGTGAACCTGGTAGGTTAGATCCCAGGCGTAGAACAGTTTATCAGCGTCTTGCATTACAATGTACTGCAGGTCATAAATTGTCAGTCAGGGTCCCTACCAAACCACTGTTGGAAAAAAGTGGTAGAAATGCCACCAAATATAAAGTGAGATGGAGAAATCTGCAGCAATGTC…	AMC_YDL227C_HO chromosome4:46271-48031 - 692ATGCTTTCTGAAAACACGACTATTCTGATGGCTAACGGTGAAATTAAAGACATCGCAAACGTCACGGCTAACTCTTACGTTATGTGCGCAGATGGCTCCGCTGCCCGCGTCATAAATGTCACACAGGGCTATCAGAAAATCTATAATATACAGCAAAAAACCAAACACAGAGCTTTTGAAGGTGAACCTGGTAGGTTAGATCCCAGGCGTAGAACAGTTTATCAGCGTCTTGCATTACAATGTACTGCAGGTCATAAATTGTCAGTCAGGGTCCCTACCAAACCACTGTTGGAAAAAAGTGGTAGAAATGCCACCAAATATAAAGTGAGATGGAGAAATCTGCAGCAATGTCAGA…	ALA	notfound	notfound	GLY	notfound	notfound	notfound	notfound	LEU	notfound	notfound	LEU	notfound	notfound	notfound	3	Louisiana, USA	AMC	Insect
BBL	no	> BBL_YDL227C_HO chromosome4:46271-48031 - 692 ATGCTTTCTGAAAACACGACTATTCTGATGGCTAACGGTGAAATTAAAGACATCGCAAACGTCACGGCTAACTCTTACGTTATGTGCGCAGATGGCTCCGCTGCCCGCGTCATAAATGTCACACAGGGCTATCAGAAAATCTATAATATACAGCAAAAAACCAAACACAGAGCTTTTGAAGGTGAACCTGGTAGGTTAGATCCCAGGCGTAGAACAGTTTATCAGCGTCTTGCATTACAATGTACTGCAGGTCATAAATTGTCAGTCAGGGTCCCTACCAAACCACTGTTGGAAAAAAGTGGTAGAAATGCCACCAAATATAAAGTGAGATGGAGAAATCTGCAGCAATGTC…	BBL_YDL227C_HO chromosome4:46271-48031 - 692ATGCTTTCTGAAAACACGACTATTCTGATGGCTAACGGTGAAATTAAAGACATCGCAAACGTCACGGCTAACTCTTACGTTATGTGCGCAGATGGCTCCGCTGCCCGCGTCATAAATGTCACACAGGGCTATCAGAAAATCTATAATATACAGCAAAAAACCAAACACAGAGCTTTTGAAGGTGAACCTGGTAGGTTAGATCCCAGGCGTAGAACAGTTTATCAGCGTCTTGCATTACAATGTACTGCAGGTCATAAATTGTCAGTCAGGGTCCCTACCAAACCACTGTTGGAAAAAAGTGGTAGAAATGCCACCAAATATAAAGTGAGATGGAGAAATCTGCAGCAATGTCAGA…	ALA	notfound	notfound	GLY	notfound	notfound	notfound	notfound	LEU	notfound	notfound	LEU	notfound	notfound	notfound	3	Platanus orientalis forest, in Belasista Mountain, near Kamena Village in Bulgaria	BBL	Insect
CCF	no	> CCF_YDL227C_HO chromosome4:46271-48031 - 692 ATGCTTTCTGAAAACACGACTATTCTGATGGCTAACGGTGAAATTAAAGACATCGCAAACGTCACGGCTAACTCTTACGTTATGTGCGCAGATGGCTCCGCTGCCCGCGTCATAAATGTCACACAGGGCTATCAGAAAATCTATAATATACAGCAAAAAACCAAACACAGAGCTTTTGAAGGTGAACCTGGTAGGTTAGATCCCAGGCGTAGAACAGTTTATCAGCGTCTTGCATTACAATGTACTGCAGGTCATAAATTGTCAGTCAGGGTCCCTACCAAACCATTGTTGGAAAAAAGTGGTAGAAATGCCACCAAATATAAAGTGAGATGGAGAAATCTGCAGCAATGTC…	CCF_YDL227C_HO chromosome4:46271-48031 - 692ATGCTTTCTGAAAACACGACTATTCTGATGGCTAACGGTGAAATTAAAGACATCGCAAACGTCACGGCTAACTCTTACGTTATGTGCGCAGATGGCTCCGCTGCCCGCGTCATAAATGTCACACAGGGCTATCAGAAAATCTATAATATACAGCAAAAAACCAAACACAGAGCTTTTGAAGGTGAACCTGGTAGGTTAGATCCCAGGCGTAGAACAGTTTATCAGCGTCTTGCATTACAATGTACTGCAGGTCATAAATTGTCAGTCAGGGTCCCTACCAAACCATTGTTGGAAAAAAGTGGTAGAAATGCCACCAAATATAAAGTGAGATGGAGAAATCTGCAGCAATGTCAGA…	ALA	notfound	notfound	GLY	notfound	notfound	notfound	notfound	LEU	notfound	notfound	LEU	notfound	notfound	notfound	3	Yasuni, Orellana	CCF	Insect
CCH	no	> CCH_YDL227C_HO chromosome4:46271-48031 - 692 ATGCTTTCTGAAAACACGACTATTCTGATGGCTAACGGTGAAATTAAAGACATCGCAAACGTCACGGCTAACTCTTACGTTATGTGCGCAGATGGCTCCGCTGCCCGCGTCATAAATGTCACACAGGGCTATCAGAAAATCTATAATATACAGCAAAAAACCAAACACAGAGCTTTTGAAGGTGAACCTGGTAGGTTAGATCCCAGGCGTAGAACAGTTTATCAGCGTCTTGCATTACAATGTACTGCAGGTCATAAATTGTCAGTCAGGGTCCCTACCAAACCATTGTTGGAAAAAAGTGGTAGAAATGCCACCAAATATAAAGTGAGATGGAGAAATCTGCAGCAATGTC…	CCH_YDL227C_HO chromosome4:46271-48031 - 692ATGCTTTCTGAAAACACGACTATTCTGATGGCTAACGGTGAAATTAAAGACATCGCAAACGTCACGGCTAACTCTTACGTTATGTGCGCAGATGGCTCCGCTGCCCGCGTCATAAATGTCACACAGGGCTATCAGAAAATCTATAATATACAGCAAAAAACCAAACACAGAGCTTTTGAAGGTGAACCTGGTAGGTTAGATCCCAGGCGTAGAACAGTTTATCAGCGTCTTGCATTACAATGTACTGCAGGTCATAAATTGTCAGTCAGGGTCCCTACCAAACCATTGTTGGAAAAAAGTGGTAGAAATGCCACCAAATATAAAGTGAGATGGAGAAATCTGCAGCAATGTCAGA…	ALA	notfound	notfound	GLY	notfound	notfound	notfound	notfound	LEU	notfound	notfound	LEU	notfound	notfound	notfound	3	Yasuni, Orellana	CCH	Insect
CCI	no	> CCI_YDL227C_HO chromosome4:46271-48031 - 692 ATGCTTTCTGAAAACACGACTATTCTGATGGCTAACGGTGAAATTAAAGACATCGCAAACGTCACGGCTAACTCTTACGTTATGTGCGCAGATGGCTCCGCTGCCCGCGTCATAAATGTCACACAGGGCTATCAGAAAATCTATAATATACAGCAAAAAACCAAACACAGAGCTTTTGAAGGTGAACCTGGTAGGTTAGATCCCAGGCGTAGAACAGTTTATCAGCGTCTTGCATTACAATGTACTGCAGGTCATAAATTGTCAGTCAGGGTCCCTACCAAACCATTGTTGGAAAAAAGTGGTAGAAATGCCACCAAATATAAAGTGAGATGGAGAAATCTGCAGCAATGTC…	CCI_YDL227C_HO chromosome4:46271-48031 - 692ATGCTTTCTGAAAACACGACTATTCTGATGGCTAACGGTGAAATTAAAGACATCGCAAACGTCACGGCTAACTCTTACGTTATGTGCGCAGATGGCTCCGCTGCCCGCGTCATAAATGTCACACAGGGCTATCAGAAAATCTATAATATACAGCAAAAAACCAAACACAGAGCTTTTGAAGGTGAACCTGGTAGGTTAGATCCCAGGCGTAGAACAGTTTATCAGCGTCTTGCATTACAATGTACTGCAGGTCATAAATTGTCAGTCAGGGTCCCTACCAAACCATTGTTGGAAAAAAGTGGTAGAAATGCCACCAAATATAAAGTGAGATGGAGAAATCTGCAGCAATGTCAGA…	ALA	notfound	notfound	GLY	notfound	notfound	notfound	notfound	LEU	notfound	notfound	LEU	notfound	notfound	notfound	3	Yasuni, Orellana	CCI	Insect
CDN	no	> CDN_YDL227C_HO chromosome4:46271-48031 - 692 ATGCTTTCTGAAAACACGACTATTCTGATGGCTAACGGTGAAATTAAAGACATCGCAAACGTCACGGCTAACTCTTACGTTATGTGCGCAGATGGCTCCGCTGCCCGCGTCATAAATGTCACACAGGGCTATCAGAAAATCTATAATATACAGCAAAAAACCAAACACAGAGCTTTTGAAGGTGAACCTGGTAGGTTAGATCCCAGGCGTAGAACAGTTTATCAGCGTCTTGCATTACAATGTACTGCAGGTCATAAATTGTCAGTCAGGGTCCCTACCAAACCACTGTTGGAAAAAAGTGGTAGAAATGCCACCAAATATAAAGTGAGATGGAGAAATCTGCAGCAATGTC…	CDN_YDL227C_HO chromosome4:46271-48031 - 692ATGCTTTCTGAAAACACGACTATTCTGATGGCTAACGGTGAAATTAAAGACATCGCAAACGTCACGGCTAACTCTTACGTTATGTGCGCAGATGGCTCCGCTGCCCGCGTCATAAATGTCACACAGGGCTATCAGAAAATCTATAATATACAGCAAAAAACCAAACACAGAGCTTTTGAAGGTGAACCTGGTAGGTTAGATCCCAGGCGTAGAACAGTTTATCAGCGTCTTGCATTACAATGTACTGCAGGTCATAAATTGTCAGTCAGGGTCCCTACCAAACCACTGTTGGAAAAAAGTGGTAGAAATGCCACCAAATATAAAGTGAGATGGAGAAATCTGCAGCAATGTCAGA…	ALA	notfound	notfound	GLY	notfound	notfound	notfound	notfound	LEU	notfound	notfound	LEU	notfound	notfound	notfound	3	California, USA	CDN	Insect
SACE_GAL	no	> SACE_GAL_YDL227C_HO chromosome4:46271-48031 - 692 ATGCTTTCTGAAAACACGACTATTCTGATGGCTAACGGTGAAATTAAAGACATCGCAAACGTCACGGCTAACTCTTACGTTATGTGCGCAGATGGCTCCGCTGCCCGCGTCATAAATGTCACACAGGGCTATCAGAAAATCTATAATATACAGCAAAAAACCAAACACAGAGCTTTTGAAGGTGAACCTGGTAGGTTAGATCCCAGGCGTAGAACAGTTTATCAGCGTCTTGCATTACAATGTACTGCAGGTCATAAATTGTCAGTCAGGGTCCCTACCAAACCACTGTTGGAAAAAAGTGGTAGAAATGCCACCAAATATAAAGTGAGATGGAGAAATCTGCAGCA…	SACE_GAL_YDL227C_HO chromosome4:46271-48031 - 692ATGCTTTCTGAAAACACGACTATTCTGATGGCTAACGGTGAAATTAAAGACATCGCAAACGTCACGGCTAACTCTTACGTTATGTGCGCAGATGGCTCCGCTGCCCGCGTCATAAATGTCACACAGGGCTATCAGAAAATCTATAATATACAGCAAAAAACCAAACACAGAGCTTTTGAAGGTGAACCTGGTAGGTTAGATCCCAGGCGTAGAACAGTTTATCAGCGTCTTGCATTACAATGTACTGCAGGTCATAAATTGTCAGTCAGGGTCCCTACCAAACCACTGTTGGAAAAAAGTGGTAGAAATGCCACCAAATATAAAGTGAGATGGAGAAATCTGCAGCAATG…	ALA	notfound	notfound	GLY	notfound	notfound	notfound	notfound	LEU	notfound	notfound	LEU	notfound	notfound	notfound	3	USA	SACE_GAL	Lab strain
ALD	no	> ALD_YDL227C_HO chromosome4:46271-48031 - 692 ATGCTTTCTGAAAACACGACTATTCTGATGGCTAACGGTGAAATTAAAGACATCGCAAACGTCACGGCTAACTCTTACGTTATGTGCGCAGATGGCTCCGCTGCCCGCGTCATAAATGTCACACAGGGCTATCAGAAAATCTATAATATACAGCAAAAAACCAAACACAGAGCTTTTGAAGGTGAACCTGGTAGGTTAGATCCCAGGCGTAGAACAGTTTATCAGCGTCTTGCATTACAATGTACTGCAGGTCATAAATTGTCAGTCAGGGTCCCTACCAAACCACTGTTGGAAAAAAGTGGTAGAAATGCCACCAAATATAAAGTGAGATGGAGAAATCTGCAGCAATGTC…	ALD_YDL227C_HO chromosome4:46271-48031 - 692ATGCTTTCTGAAAACACGACTATTCTGATGGCTAACGGTGAAATTAAAGACATCGCAAACGTCACGGCTAACTCTTACGTTATGTGCGCAGATGGCTCCGCTGCCCGCGTCATAAATGTCACACAGGGCTATCAGAAAATCTATAATATACAGCAAAAAACCAAACACAGAGCTTTTGAAGGTGAACCTGGTAGGTTAGATCCCAGGCGTAGAACAGTTTATCAGCGTCTTGCATTACAATGTACTGCAGGTCATAAATTGTCAGTCAGGGTCCCTACCAAACCACTGTTGGAAAAAAGTGGTAGAAATGCCACCAAATATAAAGTGAGATGGAGAAATCTGCAGCAATGTCAGA…	ALA	notfound	notfound	GLY	notfound	notfound	notfound	notfound	LEU	notfound	notfound	LEU	notfound	notfound	notfound	3	Bolivar, Ecuador	ALD	Nature
ANH	no	> ANH_YDL227C_HO chromosome4:46271-48031 - 692 ATGCTTTCTGAAAACACGACTATTCTGATGGCTAACGGTGAAATTAAAGACATCGCAAACGTCACGGCTAACTCTTACGTTATGTGCGCAGATGGCTCCGCTGCCCGCGTCATAAATGTCACACAGGGCTATCAGAAAATCTATAATATACAGCAAAAAACCAAACACAGAGCTTTTGAAGGTGAACCTGGTAGGTTAGATCCCAGGCGTAGAACAGTTTATCAGCGTCTTGCATTACAATGTACTGCAGGTCATAAATTGTCAGTCAGGGTCCCTACCAAACCACTGTTGGAAAAAAGTGGTAGAAATGCCACCAAATATAAAGTGAGATGGAGAAATCTGCAGCAATGTC…	ANH_YDL227C_HO chromosome4:46271-48031 - 692ATGCTTTCTGAAAACACGACTATTCTGATGGCTAACGGTGAAATTAAAGACATCGCAAACGTCACGGCTAACTCTTACGTTATGTGCGCAGATGGCTCCGCTGCCCGCGTCATAAATGTCACACAGGGCTATCAGAAAATCTATAATATACAGCAAAAAACCAAACACAGAGCTTTTGAAGGTGAACCTGGTAGGTTAGATCCCAGGCGTAGAACAGTTTATCAGCGTCTTGCATTACAATGTACTGCAGGTCATAAATTGTCAGTCAGGGTCCCTACCAAACCACTGTTGGAAAAAAGTGGTAGAAATGCCACCAAATATAAAGTGAGATGGAGAAATCTGCAGCAATGTCAGA…	ALA	notfound	notfound	GLY	notfound	notfound	notfound	notfound	LEU	notfound	notfound	LEU	notfound	notfound	notfound	3	Pennsylvania, USA	ANH	Nature
BAL	no	> BAL_YDL227C_HO chromosome4:46271-48031 - 692 ATGCTTTCTGAAAACACGACTATTCTGATGGCTAACGGTGAAATTAAAGACATCGCAAACGTCACGGCTAACTCTTACGTTATGTGCGCAGATGGCTCCGCTGCCCGCGTCATAAATGTCACACAGGGCTATCAGAAAATCTATAATATACAGCAAAAAACCAAACACAGAGCTTTTGAAGGTGAACCTGGTAGGTTAGATCCCAGGCGTAGAACAGTTTATCAGCGTCTTGCATTACAATGTACTGCAGGTCATAAATTGTCAGTCAGGGTCCCTACTAAACCACTGTTGGAAAAAAGTGGTAGAAATGCCACCAAATATAAAGTGAGATGGAGAAATCTGCAGCAATGTC…	BAL_YDL227C_HO chromosome4:46271-48031 - 692ATGCTTTCTGAAAACACGACTATTCTGATGGCTAACGGTGAAATTAAAGACATCGCAAACGTCACGGCTAACTCTTACGTTATGTGCGCAGATGGCTCCGCTGCCCGCGTCATAAATGTCACACAGGGCTATCAGAAAATCTATAATATACAGCAAAAAACCAAACACAGAGCTTTTGAAGGTGAACCTGGTAGGTTAGATCCCAGGCGTAGAACAGTTTATCAGCGTCTTGCATTACAATGTACTGCAGGTCATAAATTGTCAGTCAGGGTCCCTACTAAACCACTGTTGGAAAAAAGTGGTAGAAATGCCACCAAATATAAAGTGAGATGGAGAAATCTGCAGCAATGTCAGA…	ALA	notfound	notfound	GLY	notfound	notfound	notfound	notfound	LEU	notfound	notfound	LEU	notfound	notfound	notfound	3	Bawangling Mountain, Hainan province, China	BAL	Nature
BAM	no	> BAM_YDL227C_HO chromosome4:46271-48031 - 692 ATGCTTTCTGAAAACACGACTATTCTGATGGCTAACGGTGAAATTAAAGACATCGCAAACGTCACGGCTAACTCTTACGTTATGTGCGCAGATGGCTCCGCTGCCCGCGTCATAAATGTCACACAGGGCTATCAGAAAATCTATAATATACAGCAAAAAACCAAACACAGAGCTTTTGAAGGTGAACCTGGTAGGTTAGATCCCAGGCGTAGAACAGTTTATCAGCGTCTTGCATTACAATGTACTGCAGGTCATAAATTGTCAGTCAGGGTCCCTACCAAACCACTGTTGGAAAAAAGTGGTAGAAATGCCAACAAATATAAAGTGAGATGGAGAAATCTGCAGCAATGTC…	BAM_YDL227C_HO chromosome4:46271-48031 - 692ATGCTTTCTGAAAACACGACTATTCTGATGGCTAACGGTGAAATTAAAGACATCGCAAACGTCACGGCTAACTCTTACGTTATGTGCGCAGATGGCTCCGCTGCCCGCGTCATAAATGTCACACAGGGCTATCAGAAAATCTATAATATACAGCAAAAAACCAAACACAGAGCTTTTGAAGGTGAACCTGGTAGGTTAGATCCCAGGCGTAGAACAGTTTATCAGCGTCTTGCATTACAATGTACTGCAGGTCATAAATTGTCAGTCAGGGTCCCTACCAAACCACTGTTGGAAAAAAGTGGTAGAAATGCCAACAAATATAAAGTGAGATGGAGAAATCTGCAGCAATGTCAGA…	ALA	notfound	notfound	GLY	notfound	notfound	notfound	notfound	LEU	notfound	notfound	LEU	notfound	notfound	notfound	3	Wuzhi Mountain, Hainan province, China	BAM	Nature
BAN	no	> BAN_YDL227C_HO chromosome4:46271-48031 - 692 ATGCTTTCTGAAAACACGACTATTCTGATGGCTAACGGTGAAATTAAAGACATCGCAAACGTCACGGCTAACTCTTACGTTATGTGCGCAGATGGCTCCGCTGCCCGCGTCATAAATGTCACACAGGGCTATCAGAAAATCTATAATATACAGCAAAAAACCAAACACAGAGCTTTTGAAGGTGAACCTGGTAGGTTAGATCCCAGGCGTAGAACAGTTTATCAGCGTCTTGCATTACAATGTACTGCAGGTCATAAATTGTCAGTCAGGGTCCCTACCAAACCACTGTTGGAAAAAAGTGGTAGAAATGCCACCAAATATAAAGTGAGATGGAGAAATCTGCAGCAATGTC…	BAN_YDL227C_HO chromosome4:46271-48031 - 692ATGCTTTCTGAAAACACGACTATTCTGATGGCTAACGGTGAAATTAAAGACATCGCAAACGTCACGGCTAACTCTTACGTTATGTGCGCAGATGGCTCCGCTGCCCGCGTCATAAATGTCACACAGGGCTATCAGAAAATCTATAATATACAGCAAAAAACCAAACACAGAGCTTTTGAAGGTGAACCTGGTAGGTTAGATCCCAGGCGTAGAACAGTTTATCAGCGTCTTGCATTACAATGTACTGCAGGTCATAAATTGTCAGTCAGGGTCCCTACCAAACCACTGTTGGAAAAAAGTGGTAGAAATGCCACCAAATATAAAGTGAGATGGAGAAATCTGCAGCAATGTCAGA…	ALA	notfound	notfound	GLY	notfound	notfound	notfound	notfound	LEU	notfound	notfound	LEU	notfound	notfound	notfound	3	Wuzhi Mountain, Hainan province, China	BAN	Nature
BDM	no	> BDM_YDL227C_HO chromosome4:46271-48031 - 692 ATGCTTTCTGAAAACACGACTATTCTGATGGCTAACGGTGAAATTAAAGACATCGCAAACGTCACGGCTAACTCTTACGTTATGTGCGCAGATGGCTCCGCTGCCCGCGTCATAAATGTCACACAGGGCTATCAGAAAATCTATAATATACAGCAAAAAACCAAACACAGAGCTTTTGAAGGTGAACCTGGTAGGTTAGATCCCAGGCGTAGAACAGTTTATCAGCGTCTTGCATTACAATGTACTGCAGGTCATAAATTGTCAGTCAGGGTCCCTACCAAACCACTGTTGGAAAAAAGTGGTAGAAATGCCACCAAATATAAAGTGAGATGGAGAAATCTGCAGCAATGTC…	BDM_YDL227C_HO chromosome4:46271-48031 - 692ATGCTTTCTGAAAACACGACTATTCTGATGGCTAACGGTGAAATTAAAGACATCGCAAACGTCACGGCTAACTCTTACGTTATGTGCGCAGATGGCTCCGCTGCCCGCGTCATAAATGTCACACAGGGCTATCAGAAAATCTATAATATACAGCAAAAAACCAAACACAGAGCTTTTGAAGGTGAACCTGGTAGGTTAGATCCCAGGCGTAGAACAGTTTATCAGCGTCTTGCATTACAATGTACTGCAGGTCATAAATTGTCAGTCAGGGTCCCTACCAAACCACTGTTGGAAAAAAGTGGTAGAAATGCCACCAAATATAAAGTGAGATGGAGAAATCTGCAGCAATGTCAGA…	ALA	notfound	notfound	GLY	notfound	notfound	notfound	notfound	LEU	notfound	notfound	LEU	notfound	notfound	notfound	3	Majunga, Madagascar	BDM	Nature
BDN	no	> BDN_YDL227C_HO chromosome4:46271-48031 - 692 ATGCTTTCTGAAAACACGACTATTCTGATGGCTAACGGTGAAATTAAAGACATCGCAAACGTCACGGCTAACTCTTACGTTATGTGCGCAGATGGCTCCGCTGCCCGCGTCATAAATGTCACACAGGGCTATCAGAAAATCTATAATATACAGCAAAAAACCAAACACAGAGCTTTTGAAGGTGAACCTGGTAGGTTAGATCCCAGGCGTGGAACAGTTTATCAGCGTCTTGCATTACAATGTACTGCAGGTCATAAATTGTCAGTCAGGGTCCCTACCAAACCACTGTTGGAAAAAAGTGGTAGAAATGCCACCAAATATAAAGTGAGATGGAGAAATCTGCAGCAATGTC…	BDN_YDL227C_HO chromosome4:46271-48031 - 692ATGCTTTCTGAAAACACGACTATTCTGATGGCTAACGGTGAAATTAAAGACATCGCAAACGTCACGGCTAACTCTTACGTTATGTGCGCAGATGGCTCCGCTGCCCGCGTCATAAATGTCACACAGGGCTATCAGAAAATCTATAATATACAGCAAAAAACCAAACACAGAGCTTTTGAAGGTGAACCTGGTAGGTTAGATCCCAGGCGTGGAACAGTTTATCAGCGTCTTGCATTACAATGTACTGCAGGTCATAAATTGTCAGTCAGGGTCCCTACCAAACCACTGTTGGAAAAAAGTGGTAGAAATGCCACCAAATATAAAGTGAGATGGAGAAATCTGCAGCAATGTCAGA…	ALA	notfound	notfound	GLY	notfound	notfound	notfound	notfound	LEU	notfound	notfound	LEU	notfound	notfound	notfound	3	Majunga, Madagascar	BDN	Nature
BMR	no	> BMR_YDL227C_HO chromosome4:46271-48031 - 692 ATGCTTTCTGAAAACACGACTATTCTGATGGCTAACGGTGAAATTAAAGACATCGCAAACGTCACGGCTAACTCTTACGTTATGTGCGCAGATGGCTCCGCTGCCCGCGTCATAAATGTCACACAGGGCTATCAGAAAATCTATAATATACAACAAAAAACCAAACACAGAGCTTTTGAAGGTGAACCTGGTAGGTTAGATCCCAGGCGTAGAACAGTTTATCAGCGTCTTGCATTACAATGTACTGCAGGTCATAAATTGTCAGTCAGGGTCCCTACCAAACCACTGTTGGAAAAAAGTGGTAGAAATGCCACCAAATATAAAGTGAGATGGAGAAATCTGCAGCAATGTC…	BMR_YDL227C_HO chromosome4:46271-48031 - 692ATGCTTTCTGAAAACACGACTATTCTGATGGCTAACGGTGAAATTAAAGACATCGCAAACGTCACGGCTAACTCTTACGTTATGTGCGCAGATGGCTCCGCTGCCCGCGTCATAAATGTCACACAGGGCTATCAGAAAATCTATAATATACAACAAAAAACCAAACACAGAGCTTTTGAAGGTGAACCTGGTAGGTTAGATCCCAGGCGTAGAACAGTTTATCAGCGTCTTGCATTACAATGTACTGCAGGTCATAAATTGTCAGTCAGGGTCCCTACCAAACCACTGTTGGAAAAAAGTGGTAGAAATGCCACCAAATATAAAGTGAGATGGAGAAATCTGCAGCAATGTCAGA…	ALA	notfound	notfound	GLY	notfound	notfound	notfound	notfound	LEU	notfound	notfound	LEU	notfound	notfound	notfound	3	French Guiana	BMR	Nature
BMV	no	> BMV_YDL227C_HO chromosome4:46271-48031 - 692 ATGCTTTCTGAAAACACGACTATTCTGATGGCTAACGGTGAAATTAAAGACATCGCAAACGTCACGGCTAACTCTTACGTTATGTGCGCAGATGGCTCCGCTGCCCGCGTCATAAATGTCACACAGGGCTATCAGAAAATCTATAATATACARCAAAAAACCAAACACAGAGCTTTTGAAGGTGARCCTGGTAGGTTAGATCCCAGGCGTAGAACAGTTTATCAGCGTCTTGCATTACAATGTACTGCAGGTCATAAATTGTCAGTCAGGGTCCCTACCAAACCACTGTTGGAAAAAAGTGGTAGAAATGCCACCAAATATAAAGTGAGATGGAGAAATCTGCAGCAATGTC…	BMV_YDL227C_HO chromosome4:46271-48031 - 692ATGCTTTCTGAAAACACGACTATTCTGATGGCTAACGGTGAAATTAAAGACATCGCAAACGTCACGGCTAACTCTTACGTTATGTGCGCAGATGGCTCCGCTGCCCGCGTCATAAATGTCACACAGGGCTATCAGAAAATCTATAATATACARCAAAAAACCAAACACAGAGCTTTTGAAGGTGARCCTGGTAGGTTAGATCCCAGGCGTAGAACAGTTTATCAGCGTCTTGCATTACAATGTACTGCAGGTCATAAATTGTCAGTCAGGGTCCCTACCAAACCACTGTTGGAAAAAAGTGGTAGAAATGCCACCAAATATAAAGTGAGATGGAGAAATCTGCAGCAATGTCAGA…	ALA	notfound	notfound	GLY	notfound	notfound	notfound	notfound	LEU	notfound	notfound	LEU	notfound	notfound	notfound	3	French Guiana	BMV	Nature
BNA	no	> BNA_YDL227C_HO chromosome4:46271-48031 - 692 ATGCTTTCTGAAAACACGACTATTCTGATGGCTAACGGTGAAATTAAAGACATCGCAAACGTCACGGCTAACTCTTACGTTATGTGCGCAGATGGCTCCGCTGCCCGCGTCATAAATGTCACACAGGGCTATCAGAAAATCTATAATATACARCAAAAAACCAAACACAGAGCTTTTGAAGGTGARCCTGGTAGGTTAGATCCCAGGCGTAGAACAGTTTATCAGCGTCTTGCATTACAATGTACTGCAGGTCATAAATTGTCAGTCAGGGTCCCTACCAAACCACTGTTGGAAAAAAGTGGTAGAAATGCCACCAAATATAAAGTGAGATGGAGAAATCTGCAGCAATGTC…	BNA_YDL227C_HO chromosome4:46271-48031 - 692ATGCTTTCTGAAAACACGACTATTCTGATGGCTAACGGTGAAATTAAAGACATCGCAAACGTCACGGCTAACTCTTACGTTATGTGCGCAGATGGCTCCGCTGCCCGCGTCATAAATGTCACACAGGGCTATCAGAAAATCTATAATATACARCAAAAAACCAAACACAGAGCTTTTGAAGGTGARCCTGGTAGGTTAGATCCCAGGCGTAGAACAGTTTATCAGCGTCTTGCATTACAATGTACTGCAGGTCATAAATTGTCAGTCAGGGTCCCTACCAAACCACTGTTGGAAAAAAGTGGTAGAAATGCCACCAAATATAAAGTGAGATGGAGAAATCTGCAGCAATGTCAGA…	ALA	notfound	notfound	GLY	notfound	notfound	notfound	notfound	LEU	notfound	notfound	LEU	notfound	notfound	notfound	3	French Guiana	BNA	Nature
CPA	no	> CPA_YDL227C_HO chromosome4:46271-48031 - 692 ATGCTTTCTGAAAACACGACTATTCTGATGGCYAACGGTGAAATTAAAGACATCGCAAACGTCACGGCTAACTCTTACGTTATGTGCGCAGATGGCTCCGCTGCCCGCGTCATAAATGTCACACAGGGCTATCAGAAAATCTATAATATACAGCAAAAAACCAAACACAGAGCTTTTGAAGGTGAACCTGGTAGGTTAGATCCCAGGCGTAGAACAGTTTATCAGCGTCTTGCATTACAATGTACTGCAGGTCATAAATTGTCAGTCAGGGTCCCTACCAAACCACTGTTGGAAAAAAGTGGTAGAAATGCCACCAAATATAAAGTGAGATGGAGAAATCTGCAGCAATGTC…	CPA_YDL227C_HO chromosome4:46271-48031 - 692ATGCTTTCTGAAAACACGACTATTCTGATGGCYAACGGTGAAATTAAAGACATCGCAAACGTCACGGCTAACTCTTACGTTATGTGCGCAGATGGCTCCGCTGCCCGCGTCATAAATGTCACACAGGGCTATCAGAAAATCTATAATATACAGCAAAAAACCAAACACAGAGCTTTTGAAGGTGAACCTGGTAGGTTAGATCCCAGGCGTAGAACAGTTTATCAGCGTCTTGCATTACAATGTACTGCAGGTCATAAATTGTCAGTCAGGGTCCCTACCAAACCACTGTTGGAAAAAAGTGGTAGAAATGCCACCAAATATAAAGTGAGATGGAGAAATCTGCAGCAATGTCAGA…	ALA	notfound	notfound	GLY	notfound	notfound	notfound	notfound	LEU	notfound	notfound	LEU	notfound	notfound	notfound	3	Mexico	CPA	Nature
CQS	no	> CQS_YDL227C_HO chromosome4:46271-48031 - 692 ATGCTTTTTGAAAACACGACTATTCTGATGGCTAACGGTGAAATTAAAGACATCGCAAACGTCACGGCTAACTCTTACGTTATGTGCGCAGATGGCTCCGCTGCCCGCGTCATAAATGTCACACAGGGCTATCAGAAAATCTATAATATACAGCAAAAAACCAAACACAGAGCTTTTGAAGGTGAACCTGGTAGGTTAGATCCCAGGCGTAGAACAGTTTATCAGCGTCTTGCATTACAATGTACTGCAGGTCATAAATTGTCAGTCAGGGTCCCTACCAAACCACTGTTGGAAAAAAGTGGTAGAAATGCCACCAAATATAAAGTGAGATGGAGAAATCTGCAGCAATGTC…	CQS_YDL227C_HO chromosome4:46271-48031 - 692ATGCTTTTTGAAAACACGACTATTCTGATGGCTAACGGTGAAATTAAAGACATCGCAAACGTCACGGCTAACTCTTACGTTATGTGCGCAGATGGCTCCGCTGCCCGCGTCATAAATGTCACACAGGGCTATCAGAAAATCTATAATATACAGCAAAAAACCAAACACAGAGCTTTTGAAGGTGAACCTGGTAGGTTAGATCCCAGGCGTAGAACAGTTTATCAGCGTCTTGCATTACAATGTACTGCAGGTCATAAATTGTCAGTCAGGGTCCCTACCAAACCACTGTTGGAAAAAAGTGGTAGAAATGCCACCAAATATAAAGTGAGATGGAGAAATCTGCAGCAATGTCAGA…	ALA	notfound	notfound	GLY	notfound	notfound	notfound	notfound	LEU	notfound	notfound	LEU	notfound	notfound	notfound	3	French Guiana	CQS	Nature
SACE_GAS	no	> SACE_GAS_YDL227C_HO chromosome4:46271-48031 - 692 ATGCTTTCTGAAAACACGACTGTTCTGATGGCTAACGGTGAAATTAAAGACATCGCAAACGTCACGGCTAACTCTTACGTTATGTGCGCAGATGGCTCCGCTGCCCGCGTCATAAATGTCACACAGGGCTATCAGAAAATCTATAATATACAGCAAAAAACCAAACACAGAGCTTTTGAAGGTGAACCTGGTAGGTTAGATCCCAGGCGTAGAACAGTTTATCAGCGTCTTGCATTACAATGTACTGCAGGTCATAAATTGTCAGTCAGGGTCCCTACCAAACCACTGTTGGAAAAAAGTGGTAGAAATGCCACCAAATATAAAGTGAGATGGAGAAATCTGCAGCA…	SACE_GAS_YDL227C_HO chromosome4:46271-48031 - 692ATGCTTTCTGAAAACACGACTGTTCTGATGGCTAACGGTGAAATTAAAGACATCGCAAACGTCACGGCTAACTCTTACGTTATGTGCGCAGATGGCTCCGCTGCCCGCGTCATAAATGTCACACAGGGCTATCAGAAAATCTATAATATACAGCAAAAAACCAAACACAGAGCTTTTGAAGGTGAACCTGGTAGGTTAGATCCCAGGCGTAGAACAGTTTATCAGCGTCTTGCATTACAATGTACTGCAGGTCATAAATTGTCAGTCAGGGTCCCTACCAAACCACTGTTGGAAAAAAGTGGTAGAAATGCCACCAAATATAAAGTGAGATGGAGAAATCTGCAGCAATG…	ALA	notfound	notfound	GLY	notfound	notfound	notfound	notfound	LEU	notfound	notfound	LEU	notfound	notfound	notfound	3	Bahamas	SACE_GAS	Nature
SACE_GAT	no	> SACE_GAT_YDL227C_HO chromosome4:46271-48031 - 692 ATGCTTTCTGAAAACACGACTATTCTGATGGCTAACGGTGAAATTAAAGACATCGCAAACGTCACGGCTAACTCTTACGTTATGTGCGCAGATGGCTCCGCTGCCCGCGTCATAAATGTCACACAGGGCTATCAGAAAATCTATAATATACAGCAAAAAACCAAACACAGAGCTTTTGAAGGTGAACCTGGTAGGTTAGATCCCAGGCGTAGAACAGTTTATCAGCGTCTTGCATTACAATGTACTGCAGGTCATAAATTGTCAGTCAGGGTCCCTACCAAACCATTGTTGGAAAAAAGTGGTAGAAATGCCACCAAATATAAAGTGAGATGGAGAAATCTGCAGCA…	SACE_GAT_YDL227C_HO chromosome4:46271-48031 - 692ATGCTTTCTGAAAACACGACTATTCTGATGGCTAACGGTGAAATTAAAGACATCGCAAACGTCACGGCTAACTCTTACGTTATGTGCGCAGATGGCTCCGCTGCCCGCGTCATAAATGTCACACAGGGCTATCAGAAAATCTATAATATACAGCAAAAAACCAAACACAGAGCTTTTGAAGGTGAACCTGGTAGGTTAGATCCCAGGCGTAGAACAGTTTATCAGCGTCTTGCATTACAATGTACTGCAGGTCATAAATTGTCAGTCAGGGTCCCTACCAAACCATTGTTGGAAAAAAGTGGTAGAAATGCCACCAAATATAAAGTGAGATGGAGAAATCTGCAGCAATG…	ALA	notfound	notfound	GLY	notfound	notfound	notfound	notfound	LEU	notfound	notfound	LEU	notfound	notfound	notfound	3	Hawaii	SACE_GAT	Nature
SACE_YCX	no	> SACE_YCX_YDL227C_HO chromosome4:46271-48031 - 692 ATGCTTTCTGAAAACACGACTATTCTGATGGCTAACGGTGAAATTAAAGACATCGCAAACGTCACGGCTAACTCTTACGTTATGTGCGCAGATGGCTCCGCTGCCCGCGTCATAAATGTCACACAGGGCTATCAGAAAATCTATAATATACAGCAAAAAACCAAACACAGAGCTTTTGAAGGTGAACCTGGTAGGTTAGATCCCAGGCGTAGAACAGTTTATCAGCGTCTTGCATTACAATGTACTGCAGGTCATAAATTGTCAGTCAGGGTCCCTACCAAACCATTGTTGGAAAAAAGTGGTAGAAATGCCACCAAATATAAAGTGAGATGGAGAAATCTGCAGCA…	SACE_YCX_YDL227C_HO chromosome4:46271-48031 - 692ATGCTTTCTGAAAACACGACTATTCTGATGGCTAACGGTGAAATTAAAGACATCGCAAACGTCACGGCTAACTCTTACGTTATGTGCGCAGATGGCTCCGCTGCCCGCGTCATAAATGTCACACAGGGCTATCAGAAAATCTATAATATACAGCAAAAAACCAAACACAGAGCTTTTGAAGGTGAACCTGGTAGGTTAGATCCCAGGCGTAGAACAGTTTATCAGCGTCTTGCATTACAATGTACTGCAGGTCATAAATTGTCAGTCAGGGTCCCTACCAAACCATTGTTGGAAAAAAGTGGTAGAAATGCCACCAAATATAAAGTGAGATGGAGAAATCTGCAGCAATG…	ALA	notfound	notfound	GLY	notfound	notfound	notfound	notfound	LEU	notfound	notfound	LEU	notfound	notfound	notfound	3	Hawaii	SACE_YCX	Nature
AFK	no	> AFK_YDL227C_HO chromosome4:46271-48031 - 692 ATGCTTTCTGAAAACACGACTATTCTGATGGCTAACGGTGAAATTAAAGACATCGCAAACGTCACGGCTAACTCTTACGTTATGTGCGCAGATGGCTCCGCTGCCCGCGTCATAAATGTCACACAGGGCTATCAGAAAATCTATAATATACAGCAAAAAACCAAACACAGAGCTTTTGAAGGTGAACCTGGTAGGTTAGATCCCAGGCGTAGAACAGTTTATCAGCGTCTTGCATTACAATGTACTGCAGGTCATAAATTGTCAGTCAGGGTCCCTACCAAACCACTGTTGGAAAAAAGTGGTAGAAATGCCACCAAATATAAAGTGAGATGGAGAAATCTGCAGCAATGTC…	AFK_YDL227C_HO chromosome4:46271-48031 - 692ATGCTTTCTGAAAACACGACTATTCTGATGGCTAACGGTGAAATTAAAGACATCGCAAACGTCACGGCTAACTCTTACGTTATGTGCGCAGATGGCTCCGCTGCCCGCGTCATAAATGTCACACAGGGCTATCAGAAAATCTATAATATACAGCAAAAAACCAAACACAGAGCTTTTGAAGGTGAACCTGGTAGGTTAGATCCCAGGCGTAGAACAGTTTATCAGCGTCTTGCATTACAATGTACTGCAGGTCATAAATTGTCAGTCAGGGTCCCTACCAAACCACTGTTGGAAAAAAGTGGTAGAAATGCCACCAAATATAAAGTGAGATGGAGAAATCTGCAGCAATGTCAGA…	ALA	notfound	notfound	GLY	notfound	notfound	notfound	notfound	LEU	notfound	notfound	LEU	notfound	notfound	notfound	3	Pakistan	AFK	Palm wine
AKB	no	> AKB_YDL227C_HO chromosome4:46271-48031 - 692 ATGCTTTCTGAAAACACGACTATTCTGATGGCTAACGGTGAAATTAAAGACATCGCAAACGTCACGGCTAACTCTTACGTTATGTGCGCAGATGGCTCCGCTGCCCGCGTCATAAATGTCACACAGGGCTATCAGAAAATCTATAATATACAGCAAAAAACCAAACACAGAGCTTTTGAAGGTGAACCTGGTAGGTTAGATCCCAGGCGTAGAACAGTTTATCAGCGTCTTGCATTACAATGTACTGCAGGTCATAAATTGTCAGTCAGGGTCCCTACCAAACCACTGTTGGAAAAAAGTGGTAGAAATGCCACCAAATATAAAGTGAGATGGAGAAATCTGCAGCAATGTC…	AKB_YDL227C_HO chromosome4:46271-48031 - 692ATGCTTTCTGAAAACACGACTATTCTGATGGCTAACGGTGAAATTAAAGACATCGCAAACGTCACGGCTAACTCTTACGTTATGTGCGCAGATGGCTCCGCTGCCCGCGTCATAAATGTCACACAGGGCTATCAGAAAATCTATAATATACAGCAAAAAACCAAACACAGAGCTTTTGAAGGTGAACCTGGTAGGTTAGATCCCAGGCGTAGAACAGTTTATCAGCGTCTTGCATTACAATGTACTGCAGGTCATAAATTGTCAGTCAGGGTCCCTACCAAACCACTGTTGGAAAAAAGTGGTAGAAATGCCACCAAATATAAAGTGAGATGGAGAAATCTGCAGCAATGTCAGA…	ALA	notfound	notfound	GLY	notfound	notfound	notfound	notfound	LEU	notfound	notfound	LEU	notfound	notfound	notfound	3	Nigeria	AKB	Palm wine
AKC	no	> AKC_YDL227C_HO chromosome4:46271-48031 - 692 ATGCTTTCTGAAAACACGACTATTCTGATGGCTAACGGTGAAATTAAAGACATCGCAAACGTCACGGCTAACTCTTACGTTATGTGCGCAGATGGCTCCGCTGCCCGCGTCATAAATGTCACACAGGGCTATCAGAAAATCTATAATATACAGCAAAAAACCAAACACAGAGCTTTTGAAGGTGAACCTGGTAGGTTAGATCCCAGGCGTAGAACAGTTTATCAGCGTCTTGCATTACAATGTACTGCAGGTCATAAATTGTCAGTCAGGGTCCCTACCAAACCACTGTTGGAAAAAAGTGGTAGAAATGCCACCAAATATAAAGTGAGATGGAGAAATCTGCAGCAATGTC…	AKC_YDL227C_HO chromosome4:46271-48031 - 692ATGCTTTCTGAAAACACGACTATTCTGATGGCTAACGGTGAAATTAAAGACATCGCAAACGTCACGGCTAACTCTTACGTTATGTGCGCAGATGGCTCCGCTGCCCGCGTCATAAATGTCACACAGGGCTATCAGAAAATCTATAATATACAGCAAAAAACCAAACACAGAGCTTTTGAAGGTGAACCTGGTAGGTTAGATCCCAGGCGTAGAACAGTTTATCAGCGTCTTGCATTACAATGTACTGCAGGTCATAAATTGTCAGTCAGGGTCCCTACCAAACCACTGTTGGAAAAAAGTGGTAGAAATGCCACCAAATATAAAGTGAGATGGAGAAATCTGCAGCAATGTCAGA…	ALA	notfound	notfound	GLY	notfound	notfound	notfound	notfound	LEU	notfound	notfound	LEU	notfound	notfound	notfound	3	Nigeria	AKC	Palm wine
AKD	no	> AKD_YDL227C_HO chromosome4:46271-48031 - 692 ATGCTTTCTGAAAACACGACTATTCTGATGGCTAACGGTGAAATTAAAGACATCGCAAACGTCACGGCTAACTCTTACGTTATGTGCGCAGATGGCTCCGCTGCCCGCGTCATAAATGTCACACAGGGCTATCAGAAAATCTATAATATACAGCAAAAAACCAAACACAGAGCTTTTGAAGGTGAACCTGGTAGGTTAGATCCCAGGCGTAGAACAGTTTATCAGCGTCTTGCATTACAATGTACTGCAGGTCATAAATTGTCAGTCAGGGTCCCTACCAAACCACTGTTGGAAAAAAGTGGTAGAAATGCCACCAAATATAAAGTGAGATGGAGAAATCTGCAGCAATGTC…	AKD_YDL227C_HO chromosome4:46271-48031 - 692ATGCTTTCTGAAAACACGACTATTCTGATGGCTAACGGTGAAATTAAAGACATCGCAAACGTCACGGCTAACTCTTACGTTATGTGCGCAGATGGCTCCGCTGCCCGCGTCATAAATGTCACACAGGGCTATCAGAAAATCTATAATATACAGCAAAAAACCAAACACAGAGCTTTTGAAGGTGAACCTGGTAGGTTAGATCCCAGGCGTAGAACAGTTTATCAGCGTCTTGCATTACAATGTACTGCAGGTCATAAATTGTCAGTCAGGGTCCCTACCAAACCACTGTTGGAAAAAAGTGGTAGAAATGCCACCAAATATAAAGTGAGATGGAGAAATCTGCAGCAATGTCAGA…	ALA	notfound	notfound	GLY	notfound	notfound	notfound	notfound	LEU	notfound	notfound	LEU	notfound	notfound	notfound	3	Nigeria	AKD	Palm wine
AKE	no	> AKE_YDL227C_HO chromosome4:46271-48031 - 692 ATGCTTTCTGAAAACACGACTATTCTGATGGCTAACGGTGAAATTAAAGACATCGCAAACGTCACGGCTAACTCTTACGTTATGTGCGCAGATGGCTCCGCTGCCCGCGTCATAAATGTCACACAGGGCTATCAGAAAATCTATAATATACAGCAAAAAACCAAACACAGAGCTTTTGAAGGTGAACCTGGTAGGTTAGATCCCAGGCGTAGAACAGTTTATCAGCGTCTTGCATTACAATGTACTGCAGGTCATAAATTGTCAGTCAGGGTCCCTACCAAACCACTGTTGGAAAAAAGTGGTAGAAATGCCACCAAATATAAAGTGAGATGGAGAAATCTGCAGCAATGTC…	AKE_YDL227C_HO chromosome4:46271-48031 - 692ATGCTTTCTGAAAACACGACTATTCTGATGGCTAACGGTGAAATTAAAGACATCGCAAACGTCACGGCTAACTCTTACGTTATGTGCGCAGATGGCTCCGCTGCCCGCGTCATAAATGTCACACAGGGCTATCAGAAAATCTATAATATACAGCAAAAAACCAAACACAGAGCTTTTGAAGGTGAACCTGGTAGGTTAGATCCCAGGCGTAGAACAGTTTATCAGCGTCTTGCATTACAATGTACTGCAGGTCATAAATTGTCAGTCAGGGTCCCTACCAAACCACTGTTGGAAAAAAGTGGTAGAAATGCCACCAAATATAAAGTGAGATGGAGAAATCTGCAGCAATGTCAGA…	ALA	notfound	notfound	GLY	notfound	notfound	notfound	notfound	LEU	notfound	notfound	LEU	notfound	notfound	notfound	3	Nigeria	AKE	Palm wine
AKG	no	> AKG_YDL227C_HO chromosome4:46271-48031 - 692 ATGCTTTCTGAAAACACGACTATTCTGATGGCTAACGGTGAAATTAAAGACATCGCAAACGTCACGGCTAACTCTTACGTTATGTGCGCAGATGGCTCCGCTGCCCGCGTCATAAATGTCACACAGGGCTATCAGAAAATCTATAATATACAGCAAAAAACCAAACACAGAGCTTTTGAAGGTGAACCTGGTAGGTTAGATCCCAGGCGTAGAACAGTTTATCAGCGTCTTGCATTACAATGTACTGCAGGTCATAAATTGTCAGTCAGGGTCCCTACCAAACCACTGTTGGAAAAAAGTGGTAGAAATGCCACCAAATATAAAGTGAGATGGAGAAATCTGCAGCAATGTC…	AKG_YDL227C_HO chromosome4:46271-48031 - 692ATGCTTTCTGAAAACACGACTATTCTGATGGCTAACGGTGAAATTAAAGACATCGCAAACGTCACGGCTAACTCTTACGTTATGTGCGCAGATGGCTCCGCTGCCCGCGTCATAAATGTCACACAGGGCTATCAGAAAATCTATAATATACAGCAAAAAACCAAACACAGAGCTTTTGAAGGTGAACCTGGTAGGTTAGATCCCAGGCGTAGAACAGTTTATCAGCGTCTTGCATTACAATGTACTGCAGGTCATAAATTGTCAGTCAGGGTCCCTACCAAACCACTGTTGGAAAAAAGTGGTAGAAATGCCACCAAATATAAAGTGAGATGGAGAAATCTGCAGCAATGTCAGA…	ALA	notfound	notfound	GLY	notfound	notfound	notfound	notfound	LEU	notfound	notfound	LEU	notfound	notfound	notfound	3	Nigeria	AKG	Palm wine
AKH	no	> AKH_YDL227C_HO chromosome4:46271-48031 - 692 ATGCTTTCTGAAAACACGACTATTCTGATGGCTAACGGTGAAATTAAAGACATCGCAAACGTCACGGCTAACTCTTACGTTATGTGCGCAGATGGCTCCGCTGCCCGCGTCATAAATGTCACACAGGGCTATCAGAAAATCTATAATATACAGCAAAAAACCAAACACAGAGCTTTTGAAGGTGAACCTGGTAGGTTAGATCCCAGGCGTAGAACAGTTTATCAGCGTCTTGCATTACAATGTACTGCAGGTCATAAATTGTCAGTCAGGGTCCCTACCAAACCACTGTTGGAAAAAAGTGGTAGAAATGCCACCAAATATAAAGTGAGATGGAGAAATCTGCAGCAATGTC…	AKH_YDL227C_HO chromosome4:46271-48031 - 692ATGCTTTCTGAAAACACGACTATTCTGATGGCTAACGGTGAAATTAAAGACATCGCAAACGTCACGGCTAACTCTTACGTTATGTGCGCAGATGGCTCCGCTGCCCGCGTCATAAATGTCACACAGGGCTATCAGAAAATCTATAATATACAGCAAAAAACCAAACACAGAGCTTTTGAAGGTGAACCTGGTAGGTTAGATCCCAGGCGTAGAACAGTTTATCAGCGTCTTGCATTACAATGTACTGCAGGTCATAAATTGTCAGTCAGGGTCCCTACCAAACCACTGTTGGAAAAAAGTGGTAGAAATGCCACCAAATATAAAGTGAGATGGAGAAATCTGCAGCAATGTCAGA…	ALA	notfound	notfound	GLY	notfound	notfound	notfound	notfound	LEU	notfound	notfound	LEU	notfound	notfound	notfound	3	Nigeria	AKH	Palm wine
APQ	no	> APQ_YDL227C_HO chromosome4:46271-48031 - 692 ATGCTTTCTGAAAACACGACTATTCTGATGGCTAACGGTGAAATTAAAGACATCGCAAACGTCACGGCTAACTCTTACGTTATGTGCGCAGATGGCTCCGCTGCCCGCGTCATAAATGTCACACAGGGCTATCAGAAAATCTATAATATACAGCAAAAAACCAAACACAGAGCTTTTGAAGGTGAACCTGGTAGGTTAGATCCCAGGCGTAGAACAGTTTATCAGCGTCTTGCATTACAATGTACTGCAGGTCATAAATTGTCAGTCAGGGTCCCTACCAAACCACTGTTGGAAAAAAGTGGTAGAAATGCCACCAAATATAAAGTGAGATGGAGAAATCTGCAGCAATGTC…	APQ_YDL227C_HO chromosome4:46271-48031 - 692ATGCTTTCTGAAAACACGACTATTCTGATGGCTAACGGTGAAATTAAAGACATCGCAAACGTCACGGCTAACTCTTACGTTATGTGCGCAGATGGCTCCGCTGCCCGCGTCATAAATGTCACACAGGGCTATCAGAAAATCTATAATATACAGCAAAAAACCAAACACAGAGCTTTTGAAGGTGAACCTGGTAGGTTAGATCCCAGGCGTAGAACAGTTTATCAGCGTCTTGCATTACAATGTACTGCAGGTCATAAATTGTCAGTCAGGGTCCCTACCAAACCACTGTTGGAAAAAAGTGGTAGAAATGCCACCAAATATAAAGTGAGATGGAGAAATCTGCAGCAATGTCAGA…	ALA	notfound	notfound	GLY	notfound	notfound	notfound	notfound	LEU	notfound	notfound	LEU	notfound	notfound	notfound	3	Ivory Coast	APQ	Palm wine
ATP	no	> ATP_YDL227C_HO chromosome4:46271-48031 - 692 ATGCTTTCTGAAAACACGACTATTCTGATGGCTAACGGTGAAATTAAAGACATCGCAAACGTCACGGCTAACTCTTACGTTATGTGCGCAGATGGCTCCGCTGCCCGCGTCATAAATGTCACACAGGGCTATCAGAAAATCTATAATATACAGCAAAAAACCAAACACAGAGCTTTTGAAGGTGAACCTGGTAGGTTAGATCCCAGGCGTAGAACAGTTTATCAGCGTCTTGCATTACAATGTACTGCAGGTCATAAATTGTCAGTCAGGGTCCCTACCAAACCACTGTTGGAAAAAAGTGGTAGAAATGCCACCAAATATAAAGTGAGATGGAGAAATCTGCAGCAATGTC…	ATP_YDL227C_HO chromosome4:46271-48031 - 692ATGCTTTCTGAAAACACGACTATTCTGATGGCTAACGGTGAAATTAAAGACATCGCAAACGTCACGGCTAACTCTTACGTTATGTGCGCAGATGGCTCCGCTGCCCGCGTCATAAATGTCACACAGGGCTATCAGAAAATCTATAATATACAGCAAAAAACCAAACACAGAGCTTTTGAAGGTGAACCTGGTAGGTTAGATCCCAGGCGTAGAACAGTTTATCAGCGTCTTGCATTACAATGTACTGCAGGTCATAAATTGTCAGTCAGGGTCCCTACCAAACCACTGTTGGAAAAAAGTGGTAGAAATGCCACCAAATATAAAGTGAGATGGAGAAATCTGCAGCAATGTCAGA…	ALA	notfound	notfound	GLY	notfound	notfound	notfound	notfound	LEU	notfound	notfound	LEU	notfound	notfound	notfound	3	West Africa	ATP	Palm wine
CPS	no	> CPS_YDL227C_HO chromosome4:46271-48031 - 692 ATGCTTTCTGAAAACACGACTATTCTGATGGCTAACGGTGAAATTAAAGACATCGCAAACGTCACGGCTAACTCTTACGTTATGTGCGCAGATGGCTCCGCTGCCCGCGTCATAAATGTCACACAGGGCTATCAGAAAATCTATAATATACAGCAAAAAACCAAACACAGAGCTTTTGAAGGTGAACCTGGTAGGTTAGATCCCAGGCGTAGAACAGTTTATCAGCGTCTTGCATTACAATGTACTGCAGGTCATAAATTGTCAGTCAGGGTCCCTACCAAACCACTGTTGGAAAAAAGTGGTAGAAATGCCACCAAATATAAAGTGAGATGGAGAAATCTGCAGCAATGTC…	CPS_YDL227C_HO chromosome4:46271-48031 - 692ATGCTTTCTGAAAACACGACTATTCTGATGGCTAACGGTGAAATTAAAGACATCGCAAACGTCACGGCTAACTCTTACGTTATGTGCGCAGATGGCTCCGCTGCCCGCGTCATAAATGTCACACAGGGCTATCAGAAAATCTATAATATACAGCAAAAAACCAAACACAGAGCTTTTGAAGGTGAACCTGGTAGGTTAGATCCCAGGCGTAGAACAGTTTATCAGCGTCTTGCATTACAATGTACTGCAGGTCATAAATTGTCAGTCAGGGTCCCTACCAAACCACTGTTGGAAAAAAGTGGTAGAAATGCCACCAAATATAAAGTGAGATGGAGAAATCTGCAGCAATGTCAGA…	ALA	notfound	notfound	GLY	notfound	notfound	notfound	notfound	LEU	notfound	notfound	LEU	notfound	notfound	notfound	3	Burkina Faso	CPS	Palm wine
CQA	no	> CQA_YDL227C_HO chromosome4:46271-48031 - 692 ATGCTTTCTGAAAACACGACTATTCTGATGGCTAACGGTGAAATTAAAGACATCGCAAACGTCACGGCTAACTCTTACGTTATGTGCGCAGATGGCTCCGCTGCCCGCGTCATAAATGTCACACAGGGCTATCAGAAAATCTATAATATACAGCAAAAAACCAAACACAGAGCTTTTGAAGGTGAACCTGGTAGGTTAGATCCCAGGCGTAGAACAGTTTATCAGCGTCTTGCATTACAATGTACTGCAGGTCATAAATTGTCAGTCAGGGTCCCTACCAAACCACTGTTGGAAAAAAGTGGTAGAAATGCCACCAAATATAAAGTGAGATGGAGAAATCTGCAGCAATGTC…	CQA_YDL227C_HO chromosome4:46271-48031 - 692ATGCTTTCTGAAAACACGACTATTCTGATGGCTAACGGTGAAATTAAAGACATCGCAAACGTCACGGCTAACTCTTACGTTATGTGCGCAGATGGCTCCGCTGCCCGCGTCATAAATGTCACACAGGGCTATCAGAAAATCTATAATATACAGCAAAAAACCAAACACAGAGCTTTTGAAGGTGAACCTGGTAGGTTAGATCCCAGGCGTAGAACAGTTTATCAGCGTCTTGCATTACAATGTACTGCAGGTCATAAATTGTCAGTCAGGGTCCCTACCAAACCACTGTTGGAAAAAAGTGGTAGAAATGCCACCAAATATAAAGTGAGATGGAGAAATCTGCAGCAATGTCAGA…	ALA	notfound	notfound	GLY	notfound	notfound	notfound	notfound	LEU	notfound	notfound	LEU	notfound	notfound	notfound	3	Burkina Faso	CQA	Palm wine
CQB	no	> CQB_YDL227C_HO chromosome4:46271-48031 - 692 ATGCTTTCTGAAAACACGACTATTCTGATGGCTAACGGTGAAATTAAAGACATCGCAAACGTCACGGCTAACTCTTACGTTATGTGCGCAGATGGCTCCGCTGCCCGCGTCATAAATGTCACACAGGGCTATCAGAAAATCTATAATATACAGCAAAAAACCAAACACAGAGCTTTTGAAGGTGAACCTGGTAGGTTAGATCCCAGGCGTAGAACAGTTTATCAGCGTCTTGCATTACAATGTACTGCAGGTCATAAATTGTCAGTCAGGGTCCCTACCAAACCACTGTTGGAAAAAAGTGGTAGAAATGCCACCAAATATAAAGTGAGATGGAGAAATCTGCAGCAATGTC…	CQB_YDL227C_HO chromosome4:46271-48031 - 692ATGCTTTCTGAAAACACGACTATTCTGATGGCTAACGGTGAAATTAAAGACATCGCAAACGTCACGGCTAACTCTTACGTTATGTGCGCAGATGGCTCCGCTGCCCGCGTCATAAATGTCACACAGGGCTATCAGAAAATCTATAATATACAGCAAAAAACCAAACACAGAGCTTTTGAAGGTGAACCTGGTAGGTTAGATCCCAGGCGTAGAACAGTTTATCAGCGTCTTGCATTACAATGTACTGCAGGTCATAAATTGTCAGTCAGGGTCCCTACCAAACCACTGTTGGAAAAAAGTGGTAGAAATGCCACCAAATATAAAGTGAGATGGAGAAATCTGCAGCAATGTCAGA…	ALA	notfound	notfound	GLY	notfound	notfound	notfound	notfound	LEU	notfound	notfound	LEU	notfound	notfound	notfound	3	Burkina Faso	CQB	Palm wine
SACE_YAC	no	> SACE_YAC_YDL227C_HO chromosome4:46271-48031 - 692 ATGCTTTCTGAAAACACGACTATTCTGATGGCTAACGGTGAAATTAAAGACATCGCAAACGTCACGGCTAACTCTTACGTTATGTGCGCAGATGGCTCCGCTGCCCGCGTCATAAATGTCACACAGGGCTATCAGAAAATCTATAATATACAGCAAAAAACCAAACACAGAGCTTTTGAAGGTGAACCTGGTAGGTTAGATCCCAGGCGTAGAACAGTTTATCAGCGTCTTGCATTACAATGTACTGCAGGTCATAAATTGTCAGTCAGGGTCCCTACCAAACCACTGTTGGAAAAAAGTGGTAGAAATGCCACCAAATATAAAGTGAGATGGAGAAATCTGCAGCA…	SACE_YAC_YDL227C_HO chromosome4:46271-48031 - 692ATGCTTTCTGAAAACACGACTATTCTGATGGCTAACGGTGAAATTAAAGACATCGCAAACGTCACGGCTAACTCTTACGTTATGTGCGCAGATGGCTCCGCTGCCCGCGTCATAAATGTCACACAGGGCTATCAGAAAATCTATAATATACAGCAAAAAACCAAACACAGAGCTTTTGAAGGTGAACCTGGTAGGTTAGATCCCAGGCGTAGAACAGTTTATCAGCGTCTTGCATTACAATGTACTGCAGGTCATAAATTGTCAGTCAGGGTCCCTACCAAACCACTGTTGGAAAAAAGTGGTAGAAATGCCACCAAATATAAAGTGAGATGGAGAAATCTGCAGCAATG…	ALA	notfound	notfound	GLY	notfound	notfound	notfound	notfound	LEU	notfound	notfound	LEU	notfound	notfound	notfound	3	Nigeria	SACE_YAC	Palm wine
AKN	no	> AKN_YDL227C_HO chromosome4:46271-48031 - 692 ATGCTTTCTGAAAACACGACTATTCTGATGGCTAACGGTGAAATTAAAGACATCGCAAACGTCACGGCTAACTCTTACGTTATGTGCGCAGATGGCTCCGCTGCCCGCGTCATAAATGTCACACAGGGCTATCAGAAAATCTATAATATACAGCAAAAAACCAAACACAGAGCTTTTGAAGGTGAACCTGGTAGGTTAGATCCCAGGCGTAGAACAGTTTATCAGCGTCTTGCATTACAATGTACTGCAGGTCATAAATTGTCAGTCAGGGTCCCTACCAAACCACTGTTGGAAAAAAGTGGTAGAAATGCCACCAAATATAAAGTGAGATGGAGAAATCTGCAGCAATGTC…	AKN_YDL227C_HO chromosome4:46271-48031 - 692ATGCTTTCTGAAAACACGACTATTCTGATGGCTAACGGTGAAATTAAAGACATCGCAAACGTCACGGCTAACTCTTACGTTATGTGCGCAGATGGCTCCGCTGCCCGCGTCATAAATGTCACACAGGGCTATCAGAAAATCTATAATATACAGCAAAAAACCAAACACAGAGCTTTTGAAGGTGAACCTGGTAGGTTAGATCCCAGGCGTAGAACAGTTTATCAGCGTCTTGCATTACAATGTACTGCAGGTCATAAATTGTCAGTCAGGGTCCCTACCAAACCACTGTTGGAAAAAAGTGGTAGAAATGCCACCAAATATAAAGTGAGATGGAGAAATCTGCAGCAATGTCAGA…	ALA	notfound	notfound	GLY	notfound	notfound	notfound	notfound	LEU	notfound	notfound	LEU	notfound	notfound	notfound	3	Pennsylvania, USA	AKN	Soil
AMH	no	> AMH_YDL227C_HO chromosome4:46271-48031 - 692 ATGCTTTCTGAAAACACGACTATTCTGATGGCTAACGGTGAAATTAAAGACATCGCAAACGTCACAGCTAACTCTTACGTTATGTGCGCAGATGGCTCCGCTGCCCGCGTCATAAATGTCACACAGGGCTATCAGAAAATCTATAATATACAGCAAAAAACCAAACACAGAGCTTTTGAAGGTGAACCTGGTAGGTTAGATCCCAGGCGTAGAACAGTTTATCAGCGTCTTGCATTACAATGTACTGCAGGTCATAAATTGTCAGTCAGGGTCCCTACTAAACCACTGTTGGAAAAAAGTGGTAGAAATGCCACCAAATATAAAGTGAGATGGAGAAATCTGCAGCAATGTC…	AMH_YDL227C_HO chromosome4:46271-48031 - 692ATGCTTTCTGAAAACACGACTATTCTGATGGCTAACGGTGAAATTAAAGACATCGCAAACGTCACAGCTAACTCTTACGTTATGTGCGCAGATGGCTCCGCTGCCCGCGTCATAAATGTCACACAGGGCTATCAGAAAATCTATAATATACAGCAAAAAACCAAACACAGAGCTTTTGAAGGTGAACCTGGTAGGTTAGATCCCAGGCGTAGAACAGTTTATCAGCGTCTTGCATTACAATGTACTGCAGGTCATAAATTGTCAGTCAGGGTCCCTACTAAACCACTGTTGGAAAAAAGTGGTAGAAATGCCACCAAATATAAAGTGAGATGGAGAAATCTGCAGCAATGTCAGA…	ALA	notfound	notfound	GLY	notfound	notfound	notfound	notfound	LEU	notfound	notfound	LEU	notfound	notfound	notfound	3	Sinyi, Nantou, Taiwan	AMH	Soil
AND	no	> AND_YDL227C_HO chromosome4:46271-48031 - 692 ATGCTTTCTGAAAACACGACTATTCTGATGGCTAACGGTGAAATTAAAGACATCGCAAACGTCACGGCTAACTCTTACGTTATGTGCGCAGATGGCTCCGCTGCCCGCGTCATAAATGTCACACAGGGCTATCAGAAAATCTATAATATACAGCAAAAAACCAAACACAGAGCTTTTGAAGGTGAACCTGGTAGGTTAGATCCCAGGCGTAGAACAGTTTATCAGCGTCTTGCATTACAATGTACTGCAGGTCATAAATTGTCAGTCAGGGTCCCTACCAAACCACTGTTGGAAAAAAGTGGTAGAAATGCCACCAAATATAAAGTGAGATGGAGAAATCTGCAGCAATGTC…	AND_YDL227C_HO chromosome4:46271-48031 - 692ATGCTTTCTGAAAACACGACTATTCTGATGGCTAACGGTGAAATTAAAGACATCGCAAACGTCACGGCTAACTCTTACGTTATGTGCGCAGATGGCTCCGCTGCCCGCGTCATAAATGTCACACAGGGCTATCAGAAAATCTATAATATACAGCAAAAAACCAAACACAGAGCTTTTGAAGGTGAACCTGGTAGGTTAGATCCCAGGCGTAGAACAGTTTATCAGCGTCTTGCATTACAATGTACTGCAGGTCATAAATTGTCAGTCAGGGTCCCTACCAAACCACTGTTGGAAAAAAGTGGTAGAAATGCCACCAAATATAAAGTGAGATGGAGAAATCTGCAGCAATGTCAGA…	ALA	notfound	notfound	GLY	notfound	notfound	notfound	notfound	LEU	notfound	notfound	LEU	notfound	notfound	notfound	3	Pennsylvania, USA	AND	Soil
ANE	no	> ANE_YDL227C_HO chromosome4:46271-48031 - 692 ATGCTTTCTGAAAACACGACTATTCTGATGGCTAACGGTGAAATTAAAGACATCGCAAACGTCACGGCTAACTCTTACGTTATGTGCGCAGATGGCTCCGCTGCCCGCGTCATAAATGTCACACAGGGCTATCAGAAAATCTATAATATACAGCAAAAAACCAAACACAGAGCTTTTGAAGGTGAACCTGGTAGGTTAGATCCCAGGCGTAGAACAGTTTATCAGCGTCTTGCATTACAATGTACTGCAGGTCATAAATTGTCAGTCAGGGTCCCTACCAAACCACTGTTGGAAAAAAGTGGTAGAAATGCCACCAAATATAAAGTGAGATGGAGAAATCTGCAGCAATGTC…	ANE_YDL227C_HO chromosome4:46271-48031 - 692ATGCTTTCTGAAAACACGACTATTCTGATGGCTAACGGTGAAATTAAAGACATCGCAAACGTCACGGCTAACTCTTACGTTATGTGCGCAGATGGCTCCGCTGCCCGCGTCATAAATGTCACACAGGGCTATCAGAAAATCTATAATATACAGCAAAAAACCAAACACAGAGCTTTTGAAGGTGAACCTGGTAGGTTAGATCCCAGGCGTAGAACAGTTTATCAGCGTCTTGCATTACAATGTACTGCAGGTCATAAATTGTCAGTCAGGGTCCCTACCAAACCACTGTTGGAAAAAAGTGGTAGAAATGCCACCAAATATAAAGTGAGATGGAGAAATCTGCAGCAATGTCAGA…	ALA	notfound	notfound	GLY	notfound	notfound	notfound	notfound	LEU	notfound	notfound	LEU	notfound	notfound	notfound	3	Pennsylvania, USA	ANE	Soil
ANF	no	> ANF_YDL227C_HO chromosome4:46271-48031 - 692 ATGCTTTCTGAAAACACGACTATTCTGATGGCTAACGGTGAAATTAAAGACATCGCAAACGTCACGGCTAACTCTTACGTTATGTGCGCAGATGGCTCCGCTGCCCGCGTCATAAATGTCACACAGGGCTATCAGAAAATCTATAATATACAGCAAAAAACCAAACACAGAGCTTTTGAAGGTGAACCTGGTAGGTTAGATCCCAGGCGTAGAACAGTTTATCAGCGTCTTGCATTACAATGTACTGCAGGTCATAAATTGTCAGTCAGGGTCCCTACCAAACCACTGTTGGAAAAAAGTGGTAGAAATGCCACCAAATATAAAGTGAGATGGAGAAATCTGCAGCAATGTC…	ANF_YDL227C_HO chromosome4:46271-48031 - 692ATGCTTTCTGAAAACACGACTATTCTGATGGCTAACGGTGAAATTAAAGACATCGCAAACGTCACGGCTAACTCTTACGTTATGTGCGCAGATGGCTCCGCTGCCCGCGTCATAAATGTCACACAGGGCTATCAGAAAATCTATAATATACAGCAAAAAACCAAACACAGAGCTTTTGAAGGTGAACCTGGTAGGTTAGATCCCAGGCGTAGAACAGTTTATCAGCGTCTTGCATTACAATGTACTGCAGGTCATAAATTGTCAGTCAGGGTCCCTACCAAACCACTGTTGGAAAAAAGTGGTAGAAATGCCACCAAATATAAAGTGAGATGGAGAAATCTGCAGCAATGTCAGA…	ALA	notfound	notfound	GLY	notfound	notfound	notfound	notfound	LEU	notfound	notfound	LEU	notfound	notfound	notfound	3	Pennsylvania, USA	ANF	Soil
ANG	no	> ANG_YDL227C_HO chromosome4:46271-48031 - 692 ATGCTTTCTGAAAACACGACTATTCTGATGGCTAACGGTGAAATTAAAGACATCGCAAACGTCACGGCTAACTCTTACGTTATGTGCGCAGATGGCTCCGCTGCCCGCGTCATAAATGTCACACAGGGCTATCAGAAAATCTATAATATACAGCAAAAAACCAAACACAGAGCTTTTGAAGGTGAACCTGGTAGGTTAGATCCCAGGCGTAGAACAGTTTATCAGCGTCTTGCATTACAATGTACTGCAGGTCATAAATTGTCAGTCAGGGTCCCTACCAAACCACTGTTGGAAAAAAGTGGTAGAAATGCCACCAAATATAAAGTGAGATGGAGAAATCTGCAGCAATGTC…	ANG_YDL227C_HO chromosome4:46271-48031 - 692ATGCTTTCTGAAAACACGACTATTCTGATGGCTAACGGTGAAATTAAAGACATCGCAAACGTCACGGCTAACTCTTACGTTATGTGCGCAGATGGCTCCGCTGCCCGCGTCATAAATGTCACACAGGGCTATCAGAAAATCTATAATATACAGCAAAAAACCAAACACAGAGCTTTTGAAGGTGAACCTGGTAGGTTAGATCCCAGGCGTAGAACAGTTTATCAGCGTCTTGCATTACAATGTACTGCAGGTCATAAATTGTCAGTCAGGGTCCCTACCAAACCACTGTTGGAAAAAAGTGGTAGAAATGCCACCAAATATAAAGTGAGATGGAGAAATCTGCAGCAATGTCAGA…	ALA	notfound	notfound	GLY	notfound	notfound	notfound	notfound	LEU	notfound	notfound	LEU	notfound	notfound	notfound	3	Pennsylvania, USA	ANG	Soil
ANI	no	> ANI_YDL227C_HO chromosome4:46271-48031 - 692 ATGCTTTCTGAAAACACGACTATTCTGATGGCTAACGGTGAAATTAAAGACATCGCAAACGTCACGGCTAACTCTTACGTTATGTGCGCAGATGGCTCCGCTGCCCGCGTCATAAATGTCACACAGGGCTATCAGAAAATCTATAATATACAGCAAAAAACCAAACACAGAGCTTTTGAAGGTGAACCTGGTAGGTTAGATCCCAGGCGTAGAACAGTTTATCAGCGTCTTGCATTACAATGTACTGCAGGTCATAAATTGTCAGTCAGGGTCCCTACCAAACCACTGTTGGAAAAAAGTGGTAGAAATGCCACCAAATATAAAGTGAGATGGAGAAATCTGCAGCAATGTC…	ANI_YDL227C_HO chromosome4:46271-48031 - 692ATGCTTTCTGAAAACACGACTATTCTGATGGCTAACGGTGAAATTAAAGACATCGCAAACGTCACGGCTAACTCTTACGTTATGTGCGCAGATGGCTCCGCTGCCCGCGTCATAAATGTCACACAGGGCTATCAGAAAATCTATAATATACAGCAAAAAACCAAACACAGAGCTTTTGAAGGTGAACCTGGTAGGTTAGATCCCAGGCGTAGAACAGTTTATCAGCGTCTTGCATTACAATGTACTGCAGGTCATAAATTGTCAGTCAGGGTCCCTACCAAACCACTGTTGGAAAAAAGTGGTAGAAATGCCACCAAATATAAAGTGAGATGGAGAAATCTGCAGCAATGTCAGA…	ALA	notfound	notfound	GLY	notfound	notfound	notfound	notfound	LEU	notfound	notfound	LEU	notfound	notfound	notfound	3	Pennsylvania, USA	ANI	Soil
AVI	no	> AVI_YDL227C_HO chromosome4:46271-48031 - 692 ATGCTTTCTGAAAACACGACTATTCTGATGGCTAACGGTGAAATTAAAGACATCGCAAACGTCACGGCTAACTCTTACGTTATGTGCGCAGATGGCTCCGCTGCCCGCGTCATAAATGTCACACAGGGCTATCAGAAAATCTATAATATACAGCAAAAAACCAAACACAGAGCTTTTGAAGGTGAACCTGGTAGGTTAGATCCCAGGCGTAGAACAGTTTATCAGCGTCTTGCATTACAATGTACTGCAGGTCATAAATTGTCAGTCAGGGTCCCTACCAAACCACTGTTGGAAAAAAGTGGTAGAAATGCCACCAAATATAAAGTGAGATGGAGAAATCTGCAGCAATGTC…	AVI_YDL227C_HO chromosome4:46271-48031 - 692ATGCTTTCTGAAAACACGACTATTCTGATGGCTAACGGTGAAATTAAAGACATCGCAAACGTCACGGCTAACTCTTACGTTATGTGCGCAGATGGCTCCGCTGCCCGCGTCATAAATGTCACACAGGGCTATCAGAAAATCTATAATATACAGCAAAAAACCAAACACAGAGCTTTTGAAGGTGAACCTGGTAGGTTAGATCCCAGGCGTAGAACAGTTTATCAGCGTCTTGCATTACAATGTACTGCAGGTCATAAATTGTCAGTCAGGGTCCCTACCAAACCACTGTTGGAAAAAAGTGGTAGAAATGCCACCAAATATAAAGTGAGATGGAGAAATCTGCAGCAATGTCAGA…	ALA	notfound	notfound	GLY	notfound	notfound	notfound	notfound	LEU	notfound	notfound	LEU	notfound	notfound	notfound	3	Pennsylvanian	AVI	Soil
BAP	no	> BAP_YDL227C_HO chromosome4:46271-48031 - 692 ATGCTTTCTGAAAACACGACTATTCTGATGGCTAACGGTGAAATTAAAGACATCGCAAACGTCACGGCTAACTCTTACGTTATGTGCGCAGATGGCTCCGCTGCCCGCGTCATAAATGTCACACAGGGCTATCAGAAAATCTATAATATACAGCAAAAAACCAAACACAGAGCTTTTGAAGGTGAACCTGGTAGGTTAGATCCCAGGCGTAGAACAGTTTATCAGCGTCTTGCATTACAATGTACTGCAGGTCATAAATTGTCAGTCAGGGTCCCTACCAAACCATTGTTGGAAAAAAGTGGTAGAAATGCCACCAAATATAAAGTGAGATGGAGAAATCTGCAGCAATGTC…	BAP_YDL227C_HO chromosome4:46271-48031 - 692ATGCTTTCTGAAAACACGACTATTCTGATGGCTAACGGTGAAATTAAAGACATCGCAAACGTCACGGCTAACTCTTACGTTATGTGCGCAGATGGCTCCGCTGCCCGCGTCATAAATGTCACACAGGGCTATCAGAAAATCTATAATATACAGCAAAAAACCAAACACAGAGCTTTTGAAGGTGAACCTGGTAGGTTAGATCCCAGGCGTAGAACAGTTTATCAGCGTCTTGCATTACAATGTACTGCAGGTCATAAATTGTCAGTCAGGGTCCCTACCAAACCATTGTTGGAAAAAAGTGGTAGAAATGCCACCAAATATAAAGTGAGATGGAGAAATCTGCAGCAATGTCAGA…	ALA	notfound	notfound	GLY	notfound	notfound	notfound	notfound	LEU	notfound	notfound	LEU	notfound	notfound	notfound	3	Wuzhi Mountain, Hainan province, China	BAP	Soil
BBQ	no	> BBQ_YDL227C_HO chromosome4:46271-48031 - 692 ATGCTTTCTGAAAACACGACTATTCTGATGGCTAACGGTGAAATTAAAGACATCGCAAACGTCACGGCTAACTCTTACGTTATGTGCGCAGATGGCTCCGCTGCCCGCGTCATAAATGTCACACAGGGCTATCAGAAAATCTATAATATACAGCAAAAAACCAAACACAGAGCTTTTGAAGGTGAACCTGGTAGGTTAGATCCCAGGCGTAGAACAGTTTATCAGCGTCTTGCATTACAATGTACTGCAGGTCATAAATTGTCAGTCAGGGTCCCTACCAAACCACTGTTGGAAAAAAGTGGTAGAAATGCCACCAAATATAAAGTGAGATGGAGAAATCTGCAGCAATGTC…	BBQ_YDL227C_HO chromosome4:46271-48031 - 692ATGCTTTCTGAAAACACGACTATTCTGATGGCTAACGGTGAAATTAAAGACATCGCAAACGTCACGGCTAACTCTTACGTTATGTGCGCAGATGGCTCCGCTGCCCGCGTCATAAATGTCACACAGGGCTATCAGAAAATCTATAATATACAGCAAAAAACCAAACACAGAGCTTTTGAAGGTGAACCTGGTAGGTTAGATCCCAGGCGTAGAACAGTTTATCAGCGTCTTGCATTACAATGTACTGCAGGTCATAAATTGTCAGTCAGGGTCCCTACCAAACCACTGTTGGAAAAAAGTGGTAGAAATGCCACCAAATATAAAGTGAGATGGAGAAATCTGCAGCAATGTCAGA…	ALA	notfound	notfound	GLY	notfound	notfound	notfound	notfound	LEU	notfound	notfound	LEU	notfound	notfound	notfound	3	Hungary	BBQ	Soil
BBS	no	> BBS_YDL227C_HO chromosome4:46271-48031 - 692 ATGCTTTCTGAAAACACGACTATTCTGATGGCTAACGGTGAAATTAAAGACATCGCAAACGTCACGGCTAACTCTTACGTTATGTGCGCAGATGGCTCCGCTGCCCGCGTCATAAATGTCACACAGGGCTATCAGAAAATCTATAATATACAGCAAAAAACCAAACACAGAGCTTTTGAAGGTGAACCTGGTAGGTTAGATCCCAGGCGTAGAACAGTTTATCAGCGTCTTGCATTACAATGTACTGCAGGTCATAAATTGTCAGTCAGGGTCCCTACCAAACCACTGTTGGAAAAAAGTGGTAGAAATGCCACCAAATATAAAGTGAGATGGAGAAATCTGCAGCAATGTC…	BBS_YDL227C_HO chromosome4:46271-48031 - 692ATGCTTTCTGAAAACACGACTATTCTGATGGCTAACGGTGAAATTAAAGACATCGCAAACGTCACGGCTAACTCTTACGTTATGTGCGCAGATGGCTCCGCTGCCCGCGTCATAAATGTCACACAGGGCTATCAGAAAATCTATAATATACAGCAAAAAACCAAACACAGAGCTTTTGAAGGTGAACCTGGTAGGTTAGATCCCAGGCGTAGAACAGTTTATCAGCGTCTTGCATTACAATGTACTGCAGGTCATAAATTGTCAGTCAGGGTCCCTACCAAACCACTGTTGGAAAAAAGTGGTAGAAATGCCACCAAATATAAAGTGAGATGGAGAAATCTGCAGCAATGTCAGA…	ALA	notfound	notfound	GLY	notfound	notfound	notfound	notfound	LEU	notfound	notfound	LEU	notfound	notfound	notfound	3	Hungary	BBS	Soil
BPA	no	> BPA_YDL227C_HO chromosome4:46271-48031 - 692 ATGCTTTCTGAAAACACGACTATTCTGATGGCTAACGGTGAAATTAAAGACATCGCAAACGTCACGGCTAACTCTTACGTTATGTGCGCAGATGGCTCCGCTGCCCGCGTCATAAATGTCACACAGGGCTATCAGAAAATCTATAATATACAGCAAAAAACTAAACACAGAGCTTTTGAAGGTGAACCTGGTAGGTTAGATCCCAGGCGTAGAACAGTTTATCAGAGTCTTGCATTACAATGTACTGCAGGTCATAAATTGTCAGTCAGGGTCCCTACAAAACCACTGTTGGAAAAAAGTGGTAGAAATGCCACCAAATATAAAGTGAGATGGAGAAATCTGCAGCAATGTC…	BPA_YDL227C_HO chromosome4:46271-48031 - 692ATGCTTTCTGAAAACACGACTATTCTGATGGCTAACGGTGAAATTAAAGACATCGCAAACGTCACGGCTAACTCTTACGTTATGTGCGCAGATGGCTCCGCTGCCCGCGTCATAAATGTCACACAGGGCTATCAGAAAATCTATAATATACAGCAAAAAACTAAACACAGAGCTTTTGAAGGTGAACCTGGTAGGTTAGATCCCAGGCGTAGAACAGTTTATCAGAGTCTTGCATTACAATGTACTGCAGGTCATAAATTGTCAGTCAGGGTCCCTACAAAACCACTGTTGGAAAAAAGTGGTAGAAATGCCACCAAATATAAAGTGAGATGGAGAAATCTGCAGCAATGTCAGA…	ALA	notfound	notfound	GLY	notfound	notfound	notfound	notfound	LEU	notfound	notfound	LEU	notfound	notfound	notfound	3	Viik, Helsinki, Finland	BPA	Soil
CDB	no	> CDB_YDL227C_HO chromosome4:46271-48031 - 692 ATGCTTTCTGAAAACACGACTATTCTGATGGCTAACGGTGAAATTAAAGACATCGCAAACGTCACGGCTAACTCTTACGTTATGTGCGCAGATGGCTCCGCTGCCCGCGTCATAAATGTCACACAGGGCTATCAGAAAATCTATAATATACAGCAAAAAACCAAACACAGAGCTTTTGAAGGTGAACCTGGTAGGTTAGATCCCAGGCGTAGAACAGTTTATCAGCGTCTTGCATTACAATGTACTGCAGGTCATAAATTGTCAGTCAGGGTCCCTACCAAACCACTGTTGGAAAAAAGTGGTAGAAATGCCACCAAATATAAAGTGAGATGGAGAAATCTGCAGCAATGTC…	CDB_YDL227C_HO chromosome4:46271-48031 - 692ATGCTTTCTGAAAACACGACTATTCTGATGGCTAACGGTGAAATTAAAGACATCGCAAACGTCACGGCTAACTCTTACGTTATGTGCGCAGATGGCTCCGCTGCCCGCGTCATAAATGTCACACAGGGCTATCAGAAAATCTATAATATACAGCAAAAAACCAAACACAGAGCTTTTGAAGGTGAACCTGGTAGGTTAGATCCCAGGCGTAGAACAGTTTATCAGCGTCTTGCATTACAATGTACTGCAGGTCATAAATTGTCAGTCAGGGTCCCTACCAAACCACTGTTGGAAAAAAGTGGTAGAAATGCCACCAAATATAAAGTGAGATGGAGAAATCTGCAGCAATGTCAGA…	ALA	notfound	notfound	GLY	notfound	notfound	notfound	notfound	LEU	notfound	notfound	LEU	notfound	notfound	notfound	3	Japan	CDB	Soil
CEG	no	> CEG_YDL227C_HO chromosome4:46271-48031 - 692 ATGCTTTCTGAAAACACGACTATTCTGATGGCTAACGGTGAAATTAAAGACATCGCAAACGTCACAGCTAACTCTTACGTTATGTGCGCAGATGGCTCCGCTGCCCGCGTCATAAATGTCACACAGGGCTATCAGAAAATCTATAATATACAGCAAAAAACCAAACACAGAGCTTTTGAAGGTGAACCTGGTAGGTTAGATCCCAGGCGTAGAACAGTTTATCAGCGTCTTGCATTACAATGTACTGCAGGTCATAAATTGTCAGTCAGGGTCCCTACTAAACCACTGTTGGAAAAAAGTGGTAGAAATGCCACCAAATATAAAGTGAGATGGAGAAATCTGCAGCAATGTC…	CEG_YDL227C_HO chromosome4:46271-48031 - 692ATGCTTTCTGAAAACACGACTATTCTGATGGCTAACGGTGAAATTAAAGACATCGCAAACGTCACAGCTAACTCTTACGTTATGTGCGCAGATGGCTCCGCTGCCCGCGTCATAAATGTCACACAGGGCTATCAGAAAATCTATAATATACAGCAAAAAACCAAACACAGAGCTTTTGAAGGTGAACCTGGTAGGTTAGATCCCAGGCGTAGAACAGTTTATCAGCGTCTTGCATTACAATGTACTGCAGGTCATAAATTGTCAGTCAGGGTCCCTACTAAACCACTGTTGGAAAAAAGTGGTAGAAATGCCACCAAATATAAAGTGAGATGGAGAAATCTGCAGCAATGTCAGA…	ALA	notfound	notfound	GLY	notfound	notfound	notfound	notfound	LEU	notfound	notfound	LEU	notfound	notfound	notfound	3	Taiwan	CEG	Soil
CEI	no	> CEI_YDL227C_HO chromosome4:46271-48031 - 692 ATGCTTTCTGAAAACACGACTATTCTGATGGCTAACGGTGAAATTAAAGACATCGCAAACGTCACGGCTAACTCTTACGTTATGTGCGCAGATGGCTCCGCTGCCCGCGTCATAAATGTCACACAGGGCTATCAGAAAATCTATAATATACAGCAAAAAACCAAACACAGAGCTTTTGAAGGTGAACCTGGTAGGTTAGATCCCAGGCGTAGAACAGTTTATCAGCGTCTTGCATTACAATGTACTGCAGGTCATAAATTGTCAGTCAGGGTCCCTACTAAACCACTGTTGGAAAAAAGTGGTAGAAATGCCACCAAATATAAAGTGAGATGGAGAAATCTGCAGCAATGTC…	CEI_YDL227C_HO chromosome4:46271-48031 - 692ATGCTTTCTGAAAACACGACTATTCTGATGGCTAACGGTGAAATTAAAGACATCGCAAACGTCACGGCTAACTCTTACGTTATGTGCGCAGATGGCTCCGCTGCCCGCGTCATAAATGTCACACAGGGCTATCAGAAAATCTATAATATACAGCAAAAAACCAAACACAGAGCTTTTGAAGGTGAACCTGGTAGGTTAGATCCCAGGCGTAGAACAGTTTATCAGCGTCTTGCATTACAATGTACTGCAGGTCATAAATTGTCAGTCAGGGTCCCTACTAAACCACTGTTGGAAAAAAGTGGTAGAAATGCCACCAAATATAAAGTGAGATGGAGAAATCTGCAGCAATGTCAGA…	ALA	notfound	notfound	GLY	notfound	notfound	notfound	notfound	LEU	notfound	notfound	LEU	notfound	notfound	notfound	3	Taiwan	CEI	Soil
SACE_YCB	no	> SACE_YCB_YDL227C_HO chromosome4:46271-48031 - 692 ATGCTTTCTGAAAACACGACTATTCTGATGGCTAACGGTGAAATTAAAGACATCGCAAACGTCACGGCTAACTCTTACGTTATGTGCGCAGATGGCTCCGCTGCCCGCGTCATAAATGTCACACAGGGCTATCAGAAAATCTATAATATACAGCAAAAAACCAAACACAGAGCTTTTGAAGGTGAACCTGGTAGGTTAGATCCCAGGCGTAGAACAGTTTATCAGCGTCTTGCATTACAATGTACTGCAGGTCACAAATTGTCAGTCAGGGTCCCTACCAAACCACTGTTGGAAAAAAGTGGTAGAAATGCCACCAAATATAAAGTGAGATGGAGAAATCTGCAGCA…	SACE_YCB_YDL227C_HO chromosome4:46271-48031 - 692ATGCTTTCTGAAAACACGACTATTCTGATGGCTAACGGTGAAATTAAAGACATCGCAAACGTCACGGCTAACTCTTACGTTATGTGCGCAGATGGCTCCGCTGCCCGCGTCATAAATGTCACACAGGGCTATCAGAAAATCTATAATATACAGCAAAAAACCAAACACAGAGCTTTTGAAGGTGAACCTGGTAGGTTAGATCCCAGGCGTAGAACAGTTTATCAGCGTCTTGCATTACAATGTACTGCAGGTCACAAATTGTCAGTCAGGGTCCCTACCAAACCACTGTTGGAAAAAAGTGGTAGAAATGCCACCAAATATAAAGTGAGATGGAGAAATCTGCAGCAATG…	ALA	notfound	notfound	GLY	notfound	notfound	notfound	notfound	LEU	notfound	notfound	LEU	notfound	notfound	notfound	3	South Africa	SACE_YCB	Soil
AKM	no	> AKM_YDL227C_HO chromosome4:46271-48031 - 692 ATGCTTTCTGAAAACACGACTGTTCTGATGGCTAACGGTGAAATTAAAGACATCGCAAACGTCACGGCTAACTCTTACGTTATGTGCGCAGATGGCTCCGCTGCCCGCGTCATAAATGTCACACAGGGCTATCAGAAAATCTATAATATACAGCAAAAAACCAAACACAGAGCTTTTGAAGGTGAACCTGGTAGGTTAGATCCCAGGCGTAGAACAGTTTATCAGCGTCTTGCATTACAATGTACTGCAGGTCATAAATTGTCAGTCAGGGTCCCTACCAAACCACTGTTGGAAAAAAGTGGTAGAAATGCCACCAAATATAAAGTGAGATGGAGAAATCTGCAGCAATGTC…	AKM_YDL227C_HO chromosome4:46271-48031 - 692ATGCTTTCTGAAAACACGACTGTTCTGATGGCTAACGGTGAAATTAAAGACATCGCAAACGTCACGGCTAACTCTTACGTTATGTGCGCAGATGGCTCCGCTGCCCGCGTCATAAATGTCACACAGGGCTATCAGAAAATCTATAATATACAGCAAAAAACCAAACACAGAGCTTTTGAAGGTGAACCTGGTAGGTTAGATCCCAGGCGTAGAACAGTTTATCAGCGTCTTGCATTACAATGTACTGCAGGTCATAAATTGTCAGTCAGGGTCCCTACCAAACCACTGTTGGAAAAAAGTGGTAGAAATGCCACCAAATATAAAGTGAGATGGAGAAATCTGCAGCAATGTCAGA…	ALA	notfound	notfound	GLY	notfound	notfound	notfound	notfound	LEU	notfound	notfound	LEU	notfound	notfound	notfound	3	Malaysia	AKM	Tree
ALQ	no	> ALQ_YDL227C_HO chromosome4:46271-48031 - 692 ATGCTTTCTGAAAACACGACTATTCTGATGGCTAACGGTGAAATTAAAGACATCGCAAACGTCACGGCTAACTCTTACGTTATGTGCGCAGATGGCTCCGCTGCCCGCGTCATAAATGTCACACAGGGCTATCAGAAAATCTATAATATACAGCAAAAAACCAAACACAGAGCTTTTGAAGGTGAACCTGGTAGGTTAGATCCCAGGCGTAGAACAGTTTATCAGCGTCTTGCATTACAATGTACTGCAGGTCATAAATTGTCAGTCAGGGTCCCTACCAAACCACTGTTGGAAAAAAGTGGTAGAAATGCCACCAAATATAAAGTGAGATGGAGAAATCTGCAGCAGTGTC…	ALQ_YDL227C_HO chromosome4:46271-48031 - 692ATGCTTTCTGAAAACACGACTATTCTGATGGCTAACGGTGAAATTAAAGACATCGCAAACGTCACGGCTAACTCTTACGTTATGTGCGCAGATGGCTCCGCTGCCCGCGTCATAAATGTCACACAGGGCTATCAGAAAATCTATAATATACAGCAAAAAACCAAACACAGAGCTTTTGAAGGTGAACCTGGTAGGTTAGATCCCAGGCGTAGAACAGTTTATCAGCGTCTTGCATTACAATGTACTGCAGGTCATAAATTGTCAGTCAGGGTCCCTACCAAACCACTGTTGGAAAAAAGTGGTAGAAATGCCACCAAATATAAAGTGAGATGGAGAAATCTGCAGCAGTGTCAGA…	ALA	notfound	notfound	GLY	notfound	notfound	notfound	notfound	LEU	notfound	notfound	LEU	notfound	notfound	notfound	3	Male Zaluzie, Slovakia	ALQ	Tree
ALR	no	> ALR_YDL227C_HO chromosome4:46271-48031 - 692 ATGCTTTCTGAAAACACGACTATTCTGATGGCTAACGGTGAAATTAAAGACATCGCAAACGTCACGGCTAACTCTTACGTTATGTGCGCAGATGGCTCCGCTGCCCGCGTCATAAATGTCACACAGGGCTATCAGAAAATCTATAATATACAGCAAAAAACCAAACACAGAGCTTTTGAAGGTGAACCTGGTAGGTTAGATCCCAGGCGTAGAACAGTTTATCAGCGTCTTGCATTACAATGTACTGCAGGTCATAAATTGTCAGTCAGGGTCCCTACCAAACCACTGTTGGAAAAAAGTGGTAGAAATGCCACCAAATATAAAGTGAGATGGAGAAATCTGCAGCAATGTC…	ALR_YDL227C_HO chromosome4:46271-48031 - 692ATGCTTTCTGAAAACACGACTATTCTGATGGCTAACGGTGAAATTAAAGACATCGCAAACGTCACGGCTAACTCTTACGTTATGTGCGCAGATGGCTCCGCTGCCCGCGTCATAAATGTCACACAGGGCTATCAGAAAATCTATAATATACAGCAAAAAACCAAACACAGAGCTTTTGAAGGTGAACCTGGTAGGTTAGATCCCAGGCGTAGAACAGTTTATCAGCGTCTTGCATTACAATGTACTGCAGGTCATAAATTGTCAGTCAGGGTCCCTACCAAACCACTGTTGGAAAAAAGTGGTAGAAATGCCACCAAATATAAAGTGAGATGGAGAAATCTGCAGCAATGTCAGA…	ALA	notfound	notfound	GLY	notfound	notfound	notfound	notfound	LEU	notfound	notfound	LEU	notfound	notfound	notfound	3	Male levare, Slovakia	ALR	Tree
AMM	no	> AMM_YDL227C_HO chromosome4:46271-48031 - 692 ATGCTTTCTGAAAACACGACTATTCTGATGGCTAACGGTGAAATTAAAGACATCGCAAACGTCACGGCTAACTCTTACGTTATGTGCGCAGATGGCTCCGCTGCCCGCGTCATAAATGTCACACAGGGCTATCAGAAAATCTATAATATACAGCAAAAAACCAAACACAGAGCTTTTGAAGGTGAACCTGGTAGGTTAGATCCCAGGCGTAGAACAGTTTATCAGCGTCTTGCATTACAATGTACTGCAGGTCATAAATTGTCAGTCAGGGTCCCTACCAAACCACTGTTGGAAAAAAGTGGTAGAAATGCCACCAAATATAAAGTGAGATGGAGAAATCTGCAGCAATGTC…	AMM_YDL227C_HO chromosome4:46271-48031 - 692ATGCTTTCTGAAAACACGACTATTCTGATGGCTAACGGTGAAATTAAAGACATCGCAAACGTCACGGCTAACTCTTACGTTATGTGCGCAGATGGCTCCGCTGCCCGCGTCATAAATGTCACACAGGGCTATCAGAAAATCTATAATATACAGCAAAAAACCAAACACAGAGCTTTTGAAGGTGAACCTGGTAGGTTAGATCCCAGGCGTAGAACAGTTTATCAGCGTCTTGCATTACAATGTACTGCAGGTCATAAATTGTCAGTCAGGGTCCCTACCAAACCACTGTTGGAAAAAAGTGGTAGAAATGCCACCAAATATAAAGTGAGATGGAGAAATCTGCAGCAATGTCAGA…	ALA	notfound	notfound	GLY	notfound	notfound	notfound	notfound	LEU	notfound	notfound	LEU	notfound	notfound	notfound	3	Beinan, Taitung, Taiwan	AMM	Tree
ANC	no	> ANC_YDL227C_HO chromosome4:46271-48031 - 692 ATGCTTTCTGAAAACACGACTATTCTGATGGCTAACGGTGAAATTAAAGACATCGCAAACGTCACGGCTAACTCTTACGTTATGTGCGCAGATGGCTCCGCTGCCCGCGTCATAAATGTCACACAGGGCTATCAGAAAATCTATAATATACAGCAAAAAACCAAACACAGAGCTTTTGAAGGTGAACCTGGTAGGTTAGATCCCAGGCGTAGAACAGTTTATCAGCGTCTTGCATTACAATGTACTGCAGGTCATAAATTGTCAGTCAGGGTCCCTACCAAACCACTGTTGGAAAAAAGTGGTAGAAATGCCACCAAATATAAAGTGAGATGGAGAAATCTGCAGCAATGTC…	ANC_YDL227C_HO chromosome4:46271-48031 - 692ATGCTTTCTGAAAACACGACTATTCTGATGGCTAACGGTGAAATTAAAGACATCGCAAACGTCACGGCTAACTCTTACGTTATGTGCGCAGATGGCTCCGCTGCCCGCGTCATAAATGTCACACAGGGCTATCAGAAAATCTATAATATACAGCAAAAAACCAAACACAGAGCTTTTGAAGGTGAACCTGGTAGGTTAGATCCCAGGCGTAGAACAGTTTATCAGCGTCTTGCATTACAATGTACTGCAGGTCATAAATTGTCAGTCAGGGTCCCTACCAAACCACTGTTGGAAAAAAGTGGTAGAAATGCCACCAAATATAAAGTGAGATGGAGAAATCTGCAGCAATGTCAGA…	ALA	notfound	notfound	GLY	notfound	notfound	notfound	notfound	LEU	notfound	notfound	LEU	notfound	notfound	notfound	3	Pennsylvania, USA	ANC	Tree
ANK	no	> ANK_YDL227C_HO chromosome4:46271-48031 - 692 ATGCTTTCTGAAAACACGACTATTCTGATGGCTAACGGTGAAATTAAAGACATCGCAAACGTCACGGCTAACTCTTACGTTATGTGCGCAGATGGCTCCGCTGCCCGCGTCATAAATGTCACACAGGGCTATCAGAAAATCTATAATATACAGCAAAAAACCAAACACAGAGCTTTTGAAGGTGAACCTGGTAGGTTAGATCCCAGGCGTAGAACAGTTTATCAGCGTCTTGCATTACAATGTACTGCAGGTCATAAATTGTCAGTCAGGGTCCCTACCAAACCACTGTTGGAAAAAAGTGGTAGAAATGCCACCAAATATAAAGTGAGATGGAGAAATCTGCAGCAATGTC…	ANK_YDL227C_HO chromosome4:46271-48031 - 692ATGCTTTCTGAAAACACGACTATTCTGATGGCTAACGGTGAAATTAAAGACATCGCAAACGTCACGGCTAACTCTTACGTTATGTGCGCAGATGGCTCCGCTGCCCGCGTCATAAATGTCACACAGGGCTATCAGAAAATCTATAATATACAGCAAAAAACCAAACACAGAGCTTTTGAAGGTGAACCTGGTAGGTTAGATCCCAGGCGTAGAACAGTTTATCAGCGTCTTGCATTACAATGTACTGCAGGTCATAAATTGTCAGTCAGGGTCCCTACCAAACCACTGTTGGAAAAAAGTGGTAGAAATGCCACCAAATATAAAGTGAGATGGAGAAATCTGCAGCAATGTCAGA…	ALA	notfound	notfound	GLY	notfound	notfound	notfound	notfound	LEU	notfound	notfound	LEU	notfound	notfound	notfound	3	Pennsylvania, USA	ANK	Tree
ARG	no	> ARG_YDL227C_HO chromosome4:46271-48031 - 692 ATGCTTTCTGAAAACACGACTATTCTGATGGCTAACGGTGAAATTAAAGACATCGCAAACGTCACGGCTAACTCTTACGTTATGTGCGCAGATGGCTCCGCTGCCCGCGTCATAAATGTCACACAGGGCTATCAGAAAATCTATAATATACAGCAAAAAACCAAACACAGAGCTTTTGAAGGTGAACCTGGTAGGTTAGATCCCAGGCGTAGAACAGTTTATCAGCGTCTTGCTTTACAATGTACTGCAGGTCATAAATTGTCAGTCAGGGTCCCTACCAAACCACTGTTGGAAAAAAGTGGTAGAAATGCCACCAAATATAAAGTGAGATGGAGAAATCTGCAGCAATGTC…	ARG_YDL227C_HO chromosome4:46271-48031 - 692ATGCTTTCTGAAAACACGACTATTCTGATGGCTAACGGTGAAATTAAAGACATCGCAAACGTCACGGCTAACTCTTACGTTATGTGCGCAGATGGCTCCGCTGCCCGCGTCATAAATGTCACACAGGGCTATCAGAAAATCTATAATATACAGCAAAAAACCAAACACAGAGCTTTTGAAGGTGAACCTGGTAGGTTAGATCCCAGGCGTAGAACAGTTTATCAGCGTCTTGCTTTACAATGTACTGCAGGTCATAAATTGTCAGTCAGGGTCCCTACCAAACCACTGTTGGAAAAAAGTGGTAGAAATGCCACCAAATATAAAGTGAGATGGAGAAATCTGCAGCAATGTCAGA…	ALA	notfound	notfound	GLY	notfound	notfound	notfound	notfound	LEU	notfound	notfound	LEU	notfound	notfound	notfound	3	Celebes, Sulavesi, Indonesia	ARG	Tree
BAG	no	> BAG_YDL227C_HO chromosome4:46271-48031 - 692 ATGCTTTCTGAAAACACGACTATTCTGATGGCTAACGGTGAAATTAAAGACATCGCAAACGTCACGGCTAACTCTTACGTTATGTGCGCAGATGGCTCCGCTGCCCGCGTCATAAATGTCACACAGGGCTATCAGAAAATCTATAATATACAGCAAAAAACCAAACACAGAGCTTTTGAAGGTGAACCTGGTAGGTTAGATCCCAGGCGTAGAACAGTTTATCAGCGTCTTGCATTACAATGTACTGCAGGTCATAAATTGTCAGTCAGGGTCCCTACTAAACCACTATTGGAAAAAAGTGGTAGAAATGCCACCAAATATAAAGTGAGATGGAGAAATCTGCAGCAATGTC…	BAG_YDL227C_HO chromosome4:46271-48031 - 692ATGCTTTCTGAAAACACGACTATTCTGATGGCTAACGGTGAAATTAAAGACATCGCAAACGTCACGGCTAACTCTTACGTTATGTGCGCAGATGGCTCCGCTGCCCGCGTCATAAATGTCACACAGGGCTATCAGAAAATCTATAATATACAGCAAAAAACCAAACACAGAGCTTTTGAAGGTGAACCTGGTAGGTTAGATCCCAGGCGTAGAACAGTTTATCAGCGTCTTGCATTACAATGTACTGCAGGTCATAAATTGTCAGTCAGGGTCCCTACTAAACCACTATTGGAAAAAAGTGGTAGAAATGCCACCAAATATAAAGTGAGATGGAGAAATCTGCAGCAATGTCAGA…	ALA	notfound	notfound	GLY	notfound	notfound	notfound	notfound	LEU	notfound	notfound	LEU	notfound	notfound	notfound	3	Qinling Mountain, Shaanxi province, China	BAG	Tree
BAH	no	> BAH_YDL227C_HO chromosome4:46271-48031 - 692 ATGCTTTCTGAAAACACGACTATTCTGATGGCTAACGGTGAAATTAAAGACATCGCAAACGTCACGGCTAACTCTTACGTTATGTGCGCAGATGGCTCCGCTGCCCGCGTCATAAATGTCACACAGGGCTATCAGAAAATCTATAATATACAGCAAAAAACCAAACACAGAGCTTTTGAAGGTGAACCTGGTAGGTTAGATCCCAGGCGTAGAACAGTTTATCAGCGTCTTGCATTACAATGTACTGCAGGTCATAAATTGTCAGTCAGGGTCCCTACTAAACCACTATTGGAAAAAAGTGGTAGAAATGCCACCAAATATAAAGTGAGATGGAGAAATCTGCAGCAATGTC…	BAH_YDL227C_HO chromosome4:46271-48031 - 692ATGCTTTCTGAAAACACGACTATTCTGATGGCTAACGGTGAAATTAAAGACATCGCAAACGTCACGGCTAACTCTTACGTTATGTGCGCAGATGGCTCCGCTGCCCGCGTCATAAATGTCACACAGGGCTATCAGAAAATCTATAATATACAGCAAAAAACCAAACACAGAGCTTTTGAAGGTGAACCTGGTAGGTTAGATCCCAGGCGTAGAACAGTTTATCAGCGTCTTGCATTACAATGTACTGCAGGTCATAAATTGTCAGTCAGGGTCCCTACTAAACCACTATTGGAAAAAAGTGGTAGAAATGCCACCAAATATAAAGTGAGATGGAGAAATCTGCAGCAATGTCAGA…	ALA	notfound	notfound	GLY	notfound	notfound	notfound	notfound	LEU	notfound	notfound	LEU	notfound	notfound	notfound	3	Qinling Mountain, Shaanxi province, China	BAH	Tree
BAK	no	> BAK_YDL227C_HO chromosome4:46271-48031 - 692 ATGCTTTCTGAAAACACGACTATTCTGATGGCTAACGGTGAAATTAAAGACATCGCAAACGTCACGGCTAACTCTTACGTTATGTGCGCAGATGGCTCCGCTGCCCGCGTCATAAATGTCACACAGGGCTATCAGAAAATCTATAATATACAGCAAAAAACCAAACACAGAGCTTTTGAAGGTGAACCTGGTAGGTTAGATCCCAGGCGTAGAACAGTTTATCAGCGTCTTGCATTACAATGTACTGCAGGTCATAAATTGTCAGTCAGGGTCCCTACCAAACCACTGTTGGAAAAAAGTGGTAGAAATGCCACCAAATATAAAGTGAGATGGAGAAATCTGCAGCAATGTC…	BAK_YDL227C_HO chromosome4:46271-48031 - 692ATGCTTTCTGAAAACACGACTATTCTGATGGCTAACGGTGAAATTAAAGACATCGCAAACGTCACGGCTAACTCTTACGTTATGTGCGCAGATGGCTCCGCTGCCCGCGTCATAAATGTCACACAGGGCTATCAGAAAATCTATAATATACAGCAAAAAACCAAACACAGAGCTTTTGAAGGTGAACCTGGTAGGTTAGATCCCAGGCGTAGAACAGTTTATCAGCGTCTTGCATTACAATGTACTGCAGGTCATAAATTGTCAGTCAGGGTCCCTACCAAACCACTGTTGGAAAAAAGTGGTAGAAATGCCACCAAATATAAAGTGAGATGGAGAAATCTGCAGCAATGTCAGA…	ALA	notfound	notfound	GLY	notfound	notfound	notfound	notfound	LEU	notfound	notfound	LEU	notfound	notfound	notfound	3	Dongling Mountain, Beijing, China	BAK	Tree
BAQ	no	> BAQ_YDL227C_HO chromosome4:46271-48031 - 692 ATGCTTTCTGAAAACACGACTATTCTGATGGCTAACGGTGAAATTAAAGACATCGCAAACGTCACGGCTAACTCTTACGTTATGTGCGCAGATGGCTCCGCTGCCCGCGTCATAAATGTCACACAGGGCTATCAGAAAATCTATAATATACAGCAAAAAACCAAACACAGAGCTTTTGAAGGTGAACCTGGTAGGTTAGATCCCAGGCGTAGAACAGTTTATCAGCGTCTTGCATTACAATGTACTGCAGGTCATAAATTGTCAGTCAGGGTCCCTACCAAACCACTGTTGGAAAAAAGTGGTAGAAATGCCAACAAATATAAAGTGAGATGGAGAAATCTGCAGCAATGTC…	BAQ_YDL227C_HO chromosome4:46271-48031 - 692ATGCTTTCTGAAAACACGACTATTCTGATGGCTAACGGTGAAATTAAAGACATCGCAAACGTCACGGCTAACTCTTACGTTATGTGCGCAGATGGCTCCGCTGCCCGCGTCATAAATGTCACACAGGGCTATCAGAAAATCTATAATATACAGCAAAAAACCAAACACAGAGCTTTTGAAGGTGAACCTGGTAGGTTAGATCCCAGGCGTAGAACAGTTTATCAGCGTCTTGCATTACAATGTACTGCAGGTCATAAATTGTCAGTCAGGGTCCCTACCAAACCACTGTTGGAAAAAAGTGGTAGAAATGCCAACAAATATAAAGTGAGATGGAGAAATCTGCAGCAATGTCAGA…	ALA	notfound	notfound	GLY	notfound	notfound	notfound	notfound	LEU	notfound	notfound	LEU	notfound	notfound	notfound	3	Wuzhi Mountain, Hainan province, China	BAQ	Tree
BBR	no	> BBR_YDL227C_HO chromosome4:46271-48031 - 692 ATGCTTTCTGAAAACACGACTATTCTGATGGCTAACGGTGAAATTAAAGACATCGCAAACGTCACGGCTAACTCTTACGTTATGTGCGCAGATGGCTCCGCTGCCCGCGTCATAAATGTCACACAGGGCTATCAGAAAATCTATAATATACAGCAAAAAACCAAACACAGAGCTTTTGAAGGTGAACCTGGTAGGTTAGATCCCAGGCGTAGAACAGTTTATCAGCGTCTTGCATTACAATGTACTGCAGGTCATAAATTGTCAGTCAGGGTCCCTACCAAACCATTGTTGGAAAAAAGTGGTAGAAATGCCACCAAATATAAAGTGAGATGGAGAAATCTGCAGCAATGTC…	BBR_YDL227C_HO chromosome4:46271-48031 - 692ATGCTTTCTGAAAACACGACTATTCTGATGGCTAACGGTGAAATTAAAGACATCGCAAACGTCACGGCTAACTCTTACGTTATGTGCGCAGATGGCTCCGCTGCCCGCGTCATAAATGTCACACAGGGCTATCAGAAAATCTATAATATACAGCAAAAAACCAAACACAGAGCTTTTGAAGGTGAACCTGGTAGGTTAGATCCCAGGCGTAGAACAGTTTATCAGCGTCTTGCATTACAATGTACTGCAGGTCATAAATTGTCAGTCAGGGTCCCTACCAAACCATTGTTGGAAAAAAGTGGTAGAAATGCCACCAAATATAAAGTGAGATGGAGAAATCTGCAGCAATGTCAGA…	ALA	notfound	notfound	GLY	notfound	notfound	notfound	notfound	LEU	notfound	notfound	LEU	notfound	notfound	notfound	3	Castellon, Spain	BBR	Tree
BFP	no	> BFP_YDL227C_HO chromosome4:46271-48031 - 692 ATGCTTTCTGAAAACACGACTATTCTGATGGCTAACGGTGAAATTAAAGACATCGCAAACGTCACGGCTAACTCTTACGTTATGTGCGCAGATGGCTCCGCTGCCCGCGTCATAAATGTCACACAGGGCTATCAGAAAATCTATAATATACAGCAAAAAACCAAACACAGAGCTTTTGAAGGTGAACCTGGTAGGTTAGATCCCAGGCGTAGAACAGTTTATCAGCGTCTTGCATTACAATGTACTGCAGGTCATAAATTGTCAGTCAGGGTCCCTACCAAACCACTGTTGGAAAAAAGTGGTAGAAATGCCACCAAATATAAAGTGAGATGGAGAAATCTGCAGCAATGTC…	BFP_YDL227C_HO chromosome4:46271-48031 - 692ATGCTTTCTGAAAACACGACTATTCTGATGGCTAACGGTGAAATTAAAGACATCGCAAACGTCACGGCTAACTCTTACGTTATGTGCGCAGATGGCTCCGCTGCCCGCGTCATAAATGTCACACAGGGCTATCAGAAAATCTATAATATACAGCAAAAAACCAAACACAGAGCTTTTGAAGGTGAACCTGGTAGGTTAGATCCCAGGCGTAGAACAGTTTATCAGCGTCTTGCATTACAATGTACTGCAGGTCATAAATTGTCAGTCAGGGTCCCTACCAAACCACTGTTGGAAAAAAGTGGTAGAAATGCCACCAAATATAAAGTGAGATGGAGAAATCTGCAGCAATGTCAGA…	ALA	notfound	notfound	GLY	notfound	notfound	notfound	notfound	LEU	notfound	notfound	LEU	notfound	notfound	notfound	3	Montenegro	BFP	Tree
BMA	no	> BMA_YDL227C_HO chromosome4:46271-48031 - 692 ATGCTTTCTGAAAACACGACTGTTCTGATGGCTAACGGTGAAATTAAAGACATCGCAAACGTCACGGCTAACTCTTACGTTATGTGCGCAGATGGCTCCGCTGCCCGCGTCATAAATGTCACACAGGGCTATCAGAAAATCTATAATATACAGCAAAAAACCAAACACAGAGCTTTTGAAGGTGAACCTGGTAGGTTAGATCCCAGGCGTAGAACAGTTTATCAGCGTCTTGCATTACAATGTACTGCAGGTCATAAATTGTCAGTCAGGGTCCCTACCAAACCACTGTTGGAAAAAAGTGGTAGAAATGCCACCAAATATAAAGTGAGATGGAGAAATCTGCAGCAATGTC…	BMA_YDL227C_HO chromosome4:46271-48031 - 692ATGCTTTCTGAAAACACGACTGTTCTGATGGCTAACGGTGAAATTAAAGACATCGCAAACGTCACGGCTAACTCTTACGTTATGTGCGCAGATGGCTCCGCTGCCCGCGTCATAAATGTCACACAGGGCTATCAGAAAATCTATAATATACAGCAAAAAACCAAACACAGAGCTTTTGAAGGTGAACCTGGTAGGTTAGATCCCAGGCGTAGAACAGTTTATCAGCGTCTTGCATTACAATGTACTGCAGGTCATAAATTGTCAGTCAGGGTCCCTACCAAACCACTGTTGGAAAAAAGTGGTAGAAATGCCACCAAATATAAAGTGAGATGGAGAAATCTGCAGCAATGTCAGA…	ALA	notfound	notfound	GLY	notfound	notfound	notfound	notfound	LEU	notfound	notfound	LEU	notfound	notfound	notfound	3	Malaysia	BMA	Tree
BMB	no	> BMB_YDL227C_HO chromosome4:46271-48031 - 692 ATGCTTTCTGAAAACACGACTGTTCTGATGGCTAACGGTGAAATTAAAGACATCGCAAACGTCACGGCTAACTCTTACGTTATGTGCGCAGATGGCTCCGCTGCCCGCGTCATAAATGTCACACAGGGCTATCAGAAAATCTATAATATACAGCAAAAAACCAAACACAGAGCTTTTGAAGGTGAACCTGGTAGGTTAGATCCCAGGCGTAGAACAGTTTATCAGCGTCTTGCATTACAATGTACTGCAGGTCATAAATTGTCAGTCAGGGTCCCTACCAAACCACTGTTGGAAAAAAGTGGTAGAAATGCCACCAAATATAAAGTGAGATGGAGAAATCTGCAGCAATGTC…	BMB_YDL227C_HO chromosome4:46271-48031 - 692ATGCTTTCTGAAAACACGACTGTTCTGATGGCTAACGGTGAAATTAAAGACATCGCAAACGTCACGGCTAACTCTTACGTTATGTGCGCAGATGGCTCCGCTGCCCGCGTCATAAATGTCACACAGGGCTATCAGAAAATCTATAATATACAGCAAAAAACCAAACACAGAGCTTTTGAAGGTGAACCTGGTAGGTTAGATCCCAGGCGTAGAACAGTTTATCAGCGTCTTGCATTACAATGTACTGCAGGTCATAAATTGTCAGTCAGGGTCCCTACCAAACCACTGTTGGAAAAAAGTGGTAGAAATGCCACCAAATATAAAGTGAGATGGAGAAATCTGCAGCAATGTCAGA…	ALA	notfound	notfound	GLY	notfound	notfound	notfound	notfound	LEU	notfound	notfound	LEU	notfound	notfound	notfound	3	Malaysia	BMB	Tree
BMC	no	> BMC_YDL227C_HO chromosome4:46271-48031 - 692 ATGCTTTCTGAAAACACGACTGTTCTGATGGCTAACGGTGAAATTAAAGACATCGCAAACGTCACGGCTAACTCTTACGTTATGTGCGCAGATGGCTCCGCTGCCCGCGTCATAAATGTCACACAGGGCTATCAGAAAATCTATAATATACAGCAAAAAACCAAACACAGAGCTTTTGAAGGTGAACCTGGTAGGTTAGATCCCAGGCGTAGAACAGTTTATCAGCGTCTTGCATTACAATGTACTGCAGGTCATAAATTGTCAGTCAGGGTCCCTACCAAACCACTGTTGGAAAAAAGTGGTAGAAATGCCACCAAATATAAAGTGAGATGGAGAAATCTGCAGCAATGTC…	BMC_YDL227C_HO chromosome4:46271-48031 - 692ATGCTTTCTGAAAACACGACTGTTCTGATGGCTAACGGTGAAATTAAAGACATCGCAAACGTCACGGCTAACTCTTACGTTATGTGCGCAGATGGCTCCGCTGCCCGCGTCATAAATGTCACACAGGGCTATCAGAAAATCTATAATATACAGCAAAAAACCAAACACAGAGCTTTTGAAGGTGAACCTGGTAGGTTAGATCCCAGGCGTAGAACAGTTTATCAGCGTCTTGCATTACAATGTACTGCAGGTCATAAATTGTCAGTCAGGGTCCCTACCAAACCACTGTTGGAAAAAAGTGGTAGAAATGCCACCAAATATAAAGTGAGATGGAGAAATCTGCAGCAATGTCAGA…	ALA	notfound	notfound	GLY	notfound	notfound	notfound	notfound	LEU	notfound	notfound	LEU	notfound	notfound	notfound	3	Malaysia	BMC	Tree
CCL	no	> CCL_YDL227C_HO chromosome4:46271-48031 - 692 ATGCTTTCTGAAAACACGACTATTCTGATGGCTAACGGTGAAATTAAAGACATCGCAAACGTCACGGCTAACTCTTACGTTATGTGCGCAGATGGCTCCGCTGCCCGCGTCATAAATGTCACACAGGGCTATCAGAAAATCTATAATATACAGCAAAAAACCAAACACAGAGCTTTTGAAGGTGAACCTGGTAGGTTAGATCCCAGGCGTAGAACAGTTTATCAGCGTCTTGCATTACAATGTACTGCAGGTCATAAATTGTCAGTCAGGGTCCCTACCAAACCACTGTTGGAAAAAAGTGGTAGAAATGCCACCAAATATAAAGTGAGATGGAGAAATCTGCAGCAATGTC…	CCL_YDL227C_HO chromosome4:46271-48031 - 692ATGCTTTCTGAAAACACGACTATTCTGATGGCTAACGGTGAAATTAAAGACATCGCAAACGTCACGGCTAACTCTTACGTTATGTGCGCAGATGGCTCCGCTGCCCGCGTCATAAATGTCACACAGGGCTATCAGAAAATCTATAATATACAGCAAAAAACCAAACACAGAGCTTTTGAAGGTGAACCTGGTAGGTTAGATCCCAGGCGTAGAACAGTTTATCAGCGTCTTGCATTACAATGTACTGCAGGTCATAAATTGTCAGTCAGGGTCCCTACCAAACCACTGTTGGAAAAAAGTGGTAGAAATGCCACCAAATATAAAGTGAGATGGAGAAATCTGCAGCAATGTCAGA…	ALA	notfound	notfound	GLY	notfound	notfound	notfound	notfound	LEU	notfound	notfound	LEU	notfound	notfound	notfound	3	Gelendzhik region, Caucasus, Russia	CCL	Tree
CCP	no	> CCP_YDL227C_HO chromosome4:46271-48031 - 692 ATGCTTTCTGAAAACACGACTATTCTGATGGCTAACGGTGAAATTAAAGACATCGCAAACGTCACGGCTAACTCTTACGTTATGTGCGCAGATGGCTCCGCTGCCCGCGTCATAAATGTCACACAGGGCTATCAGAAAGTCTATAATATACAGCAAAAAACCAAACACAGAGCTTTTGAAGGTGAACCTGGTAGGTTAGATCCCAGGCGTAGAACAGTTTATCAGCGTCTTGCTTTACAATGTACTGCAGGTCATAAATTGTCAGTCAGGGTCCCTACCAAACCACTGTTGGAAAAAAGTGGTAGAAATGCCACCAAATATAAAGTGAGATGGAGAAATCTGCAGCAATGTC…	CCP_YDL227C_HO chromosome4:46271-48031 - 692ATGCTTTCTGAAAACACGACTATTCTGATGGCTAACGGTGAAATTAAAGACATCGCAAACGTCACGGCTAACTCTTACGTTATGTGCGCAGATGGCTCCGCTGCCCGCGTCATAAATGTCACACAGGGCTATCAGAAAGTCTATAATATACAGCAAAAAACCAAACACAGAGCTTTTGAAGGTGAACCTGGTAGGTTAGATCCCAGGCGTAGAACAGTTTATCAGCGTCTTGCTTTACAATGTACTGCAGGTCATAAATTGTCAGTCAGGGTCCCTACCAAACCACTGTTGGAAAAAAGTGGTAGAAATGCCACCAAATATAAAGTGAGATGGAGAAATCTGCAGCAATGTCAGA…	ALA	notfound	notfound	GLY	notfound	notfound	notfound	notfound	LEU	notfound	notfound	LEU	notfound	notfound	notfound	3	Japan	CCP	Tree
CCQ	no	> CCQ_YDL227C_HO chromosome4:46271-48031 - 692 ATGCTTTCTGAAAGCACGACTATTCTGATGGCTAACGGTGAAATTAAAGACATCGCAAACGTCACGGCTAACTCTTACGTTATGTGCGCAGATGGCTCCGCTGCCCGCGTCATAAATGTCACACAGGGCTATCAGAAAATCTATAATATACAGCAAAAAACCAAACACAGAGCTTTTGAAGGTGAACCTGGTAGGTTAGATCCCAGGCGTAGAACAGTTTATCAGCGTCTTGCATTACAATGTACTGCAGGTCATAAATTGTCAGTCAGGGTCCCTACCAAACCACTGTTGGAAAAAAGTGGTAGAAATGCCACCAAATATAAAGTGAGATGGAGAAATCTGCAGCAATGTC…	CCQ_YDL227C_HO chromosome4:46271-48031 - 692ATGCTTTCTGAAAGCACGACTATTCTGATGGCTAACGGTGAAATTAAAGACATCGCAAACGTCACGGCTAACTCTTACGTTATGTGCGCAGATGGCTCCGCTGCCCGCGTCATAAATGTCACACAGGGCTATCAGAAAATCTATAATATACAGCAAAAAACCAAACACAGAGCTTTTGAAGGTGAACCTGGTAGGTTAGATCCCAGGCGTAGAACAGTTTATCAGCGTCTTGCATTACAATGTACTGCAGGTCATAAATTGTCAGTCAGGGTCCCTACCAAACCACTGTTGGAAAAAAGTGGTAGAAATGCCACCAAATATAAAGTGAGATGGAGAAATCTGCAGCAATGTCAGA…	ALA	notfound	notfound	GLY	notfound	notfound	notfound	notfound	LEU	notfound	notfound	LEU	notfound	notfound	notfound	3	Japan	CCQ	Tree
CCR	no	> CCR_YDL227C_HO chromosome4:46271-48031 - 692 ATGCTTTCTGAAAACACGACTATTCTGATGGCTAACGGTGAAATTAAAGACATCGCAAACGTCACGGCTAACTCTTACGTTATGTGCGCAGATGGCTCCGCTGCCCGCGTCATAAATGTCACACAGGGCTATCAGAAAATCTATAATATACAGCAAAAAACCAAACACAGAGCTTTTGAAGGTGAACCTGGTAGGTTAGATCCCAGGCGTAGAACAGTTTATCAGCGTCTTGCATTACAATGTACTGCAGGTCATAAATTGTCAGTCAGGGTCCCTACCAAACCACTGTTGGAAAAAAGTGGTAGAAATGCCACCAAATATAAAGTGAGATGGAGAAATCTGCAGCAATGTC…	CCR_YDL227C_HO chromosome4:46271-48031 - 692ATGCTTTCTGAAAACACGACTATTCTGATGGCTAACGGTGAAATTAAAGACATCGCAAACGTCACGGCTAACTCTTACGTTATGTGCGCAGATGGCTCCGCTGCCCGCGTCATAAATGTCACACAGGGCTATCAGAAAATCTATAATATACAGCAAAAAACCAAACACAGAGCTTTTGAAGGTGAACCTGGTAGGTTAGATCCCAGGCGTAGAACAGTTTATCAGCGTCTTGCATTACAATGTACTGCAGGTCATAAATTGTCAGTCAGGGTCCCTACCAAACCACTGTTGGAAAAAAGTGGTAGAAATGCCACCAAATATAAAGTGAGATGGAGAAATCTGCAGCAATGTCAGA…	ALA	notfound	notfound	GLY	notfound	notfound	notfound	notfound	LEU	notfound	notfound	LEU	notfound	notfound	notfound	3	Japan	CCR	Tree
CCS	no	> CCS_YDL227C_HO chromosome4:46271-48031 - 692 ATGCTTTCTGAAAACACGACTATTCTGATGGCTAACGGTGAAATTAAAGACATCGCAAACGTCACGGCTAACTCTTACGTTATGTGCGCAGATGGCTCCGCTGCCCGCGTCATAAATGTCACACAGGGCTATCAGAAAATCTATAATATACAGCAAAAAACCAAACACAGAGCTTTTGAAGGTGAACCTGGTAGGTTAGATCCCAGGCGTAGAACAGTTTATCAGCGTCTTGCATTACAATGTACTGCAGGTCATAAATTGTCAGTCAGGGTCCCTACCAAACCACTGTTGGAAAAAAGTGGTAGAAATGCCACCAAATATAAAGTGAGATGGAGAAATCTGCAGCAATGTC…	CCS_YDL227C_HO chromosome4:46271-48031 - 692ATGCTTTCTGAAAACACGACTATTCTGATGGCTAACGGTGAAATTAAAGACATCGCAAACGTCACGGCTAACTCTTACGTTATGTGCGCAGATGGCTCCGCTGCCCGCGTCATAAATGTCACACAGGGCTATCAGAAAATCTATAATATACAGCAAAAAACCAAACACAGAGCTTTTGAAGGTGAACCTGGTAGGTTAGATCCCAGGCGTAGAACAGTTTATCAGCGTCTTGCATTACAATGTACTGCAGGTCATAAATTGTCAGTCAGGGTCCCTACCAAACCACTGTTGGAAAAAAGTGGTAGAAATGCCACCAAATATAAAGTGAGATGGAGAAATCTGCAGCAATGTCAGA…	ALA	notfound	notfound	GLY	notfound	notfound	notfound	notfound	LEU	notfound	notfound	LEU	notfound	notfound	notfound	3	Japan	CCS	Tree
CCV	no	> CCV_YDL227C_HO chromosome4:46271-48031 - 692 ATGCTTTCTGAAAACACGACTATTCTGATGGCTAACGGTGAAATTAAAGACATCGCAAACGTCACGGCTAACTCTTACGTTATGTGCGCAGATGGTTCCGCTGCCCGCGTCATAAATGTCACACAGGGCTATCAGAAAATCTATAATATACAGCAAAAAACCAAACACAGAGCTTTTGAAGGTGAACCTGGTAGGTTAGATCCCAGGCGTAGAACAGTTTATCAGCGTCTTGCATTACAATGTACTGCAGGTCATAAATTGTCAGTCAGGGTCCCTACCAAACCACTGTTGGAAAAAAGTGGTAGAAATGCCACCAAATATAAAGTGAGATGGAGAAATCTGCAGCAATGTC…	CCV_YDL227C_HO chromosome4:46271-48031 - 692ATGCTTTCTGAAAACACGACTATTCTGATGGCTAACGGTGAAATTAAAGACATCGCAAACGTCACGGCTAACTCTTACGTTATGTGCGCAGATGGTTCCGCTGCCCGCGTCATAAATGTCACACAGGGCTATCAGAAAATCTATAATATACAGCAAAAAACCAAACACAGAGCTTTTGAAGGTGAACCTGGTAGGTTAGATCCCAGGCGTAGAACAGTTTATCAGCGTCTTGCATTACAATGTACTGCAGGTCATAAATTGTCAGTCAGGGTCCCTACCAAACCACTGTTGGAAAAAAGTGGTAGAAATGCCACCAAATATAAAGTGAGATGGAGAAATCTGCAGCAATGTCAGA…	ALA	notfound	notfound	GLY	notfound	notfound	notfound	notfound	LEU	notfound	notfound	LEU	notfound	notfound	notfound	3	Sri Lanka	CCV	Tree
CDC	no	> CDC_YDL227C_HO chromosome4:46271-48031 - 692 ATGCTTTCTGAAAACACGACTATTCTGATGGCTAACGGTGAAATTAAAGACATCGCAAACGTCACGGCTAACTCTTACGTTATGTGCGCAGATGGCTCCGCTGCCCGCGTCATAAATGTCACACAGGGCTATCAGAAAATCTATAATATACAGCAAAAAACCAAACACAGAGCTTTTGAAGGTGAACCTGGTAGGTTAGATCCCAGGCGTAGAACAGTTTATCAGCGTCTTGCATTACAATGTACTGCAGGTCATAAATTGTCAGTCAGGGTCCCTACCAAACCACTGTTGGAAAAAAGTGGTAGAAATGCCACCAAATATAAAGTGAGATGGAGAAATCTGCAGCAATGTC…	CDC_YDL227C_HO chromosome4:46271-48031 - 692ATGCTTTCTGAAAACACGACTATTCTGATGGCTAACGGTGAAATTAAAGACATCGCAAACGTCACGGCTAACTCTTACGTTATGTGCGCAGATGGCTCCGCTGCCCGCGTCATAAATGTCACACAGGGCTATCAGAAAATCTATAATATACAGCAAAAAACCAAACACAGAGCTTTTGAAGGTGAACCTGGTAGGTTAGATCCCAGGCGTAGAACAGTTTATCAGCGTCTTGCATTACAATGTACTGCAGGTCATAAATTGTCAGTCAGGGTCCCTACCAAACCACTGTTGGAAAAAAGTGGTAGAAATGCCACCAAATATAAAGTGAGATGGAGAAATCTGCAGCAATGTCAGA…	ALA	notfound	notfound	GLY	notfound	notfound	notfound	notfound	LEU	notfound	notfound	LEU	notfound	notfound	notfound	3	Botanical Garden, Novosibirsk, Siberia, Russia	CDC	Tree
CDD	no	> CDD_YDL227C_HO chromosome4:46271-48031 - 692 ATGCTTTCTGAAAACACGACTATTCTGATGGCTAACGGTGAAATTAAAGACATCGCAAACGTCACGGCTAACTCTTACGTTATGTGCGCAGATGGCTCCGCTGCCCGCGTCATAAATGTCACACAGGGCTATCAGAAAATCTATAATATACAGCAAAAAACCAAACACAGAGCTTTTGAAGGTGAACCTGGTAGGTTAGATCCCAGGCGTAGAACAGTTTATCAGCGTCTTGCATTACAATGTACTGCAGGTCATAAATTGTCAGTCAGGGTCCCTACCAAACCACTGTTGGAAAAAAGTGGTAGAAATGCCACCAAATATAAAGTGAGATGGAGAAATCTGCAGCAATGTC…	CDD_YDL227C_HO chromosome4:46271-48031 - 692ATGCTTTCTGAAAACACGACTATTCTGATGGCTAACGGTGAAATTAAAGACATCGCAAACGTCACGGCTAACTCTTACGTTATGTGCGCAGATGGCTCCGCTGCCCGCGTCATAAATGTCACACAGGGCTATCAGAAAATCTATAATATACAGCAAAAAACCAAACACAGAGCTTTTGAAGGTGAACCTGGTAGGTTAGATCCCAGGCGTAGAACAGTTTATCAGCGTCTTGCATTACAATGTACTGCAGGTCATAAATTGTCAGTCAGGGTCCCTACCAAACCACTGTTGGAAAAAAGTGGTAGAAATGCCACCAAATATAAAGTGAGATGGAGAAATCTGCAGCAATGTCAGA…	ALA	notfound	notfound	GLY	notfound	notfound	notfound	notfound	LEU	notfound	notfound	LEU	notfound	notfound	notfound	3	Botanical Garden, Novosibirsk, Siberia, Russia	CDD	Tree
CDE	no	> CDE_YDL227C_HO chromosome4:46271-48031 - 692 ATGCTTTCTGAAAACACGACTATTCTGATGGCTAACGGTGAAATTAAAGACATCGCAAACGTCACGGCTAACTCTTACGTTATGTGCGCAGATGGCTCCGCTGCCCGCGTCATAAATGTCACACAGGGCTATCAGAAAATCTATAATATACAGCAAAAAACCAAACACAGAGCTTTTGAAGGTGAACCTGGTAGGTTAGATCCCAGGCGTAGAACAGTTTATCAGCGTCTTGCATTACAATGTACTGCAGGTCATAAATTGTCAGTCAGGGTCCCTACCAAACCACTGTTGGAAAAAAGTGGTAGAAATGCCACCAAATATAAAGTGAGATGGAGAAATCTGCAGCAATGTC…	CDE_YDL227C_HO chromosome4:46271-48031 - 692ATGCTTTCTGAAAACACGACTATTCTGATGGCTAACGGTGAAATTAAAGACATCGCAAACGTCACGGCTAACTCTTACGTTATGTGCGCAGATGGCTCCGCTGCCCGCGTCATAAATGTCACACAGGGCTATCAGAAAATCTATAATATACAGCAAAAAACCAAACACAGAGCTTTTGAAGGTGAACCTGGTAGGTTAGATCCCAGGCGTAGAACAGTTTATCAGCGTCTTGCATTACAATGTACTGCAGGTCATAAATTGTCAGTCAGGGTCCCTACCAAACCACTGTTGGAAAAAAGTGGTAGAAATGCCACCAAATATAAAGTGAGATGGAGAAATCTGCAGCAATGTCAGA…	ALA	notfound	notfound	GLY	notfound	notfound	notfound	notfound	LEU	notfound	notfound	LEU	notfound	notfound	notfound	3	Novosibirsk, Siberia, Russia	CDE	Tree
CDH	no	> CDH_YDL227C_HO chromosome4:46271-48031 - 692 ATGCTTTCTGAAAACACGACTATTCTGATGGCTAACGGTGAAATTAAAGACATCGCAAACGTCACGGCTAACTCTTACGTTATGTGCGCAGATGGCTCCGCTGCCCGCGTCATAAATGTCACACAGGGCTATCAGAAAATCTATAATATACAGCAAAAAACCAAACACAGAGCTTTTGAAGGTGAACCTGGTAGGTTAGATCCCAGGCGTAGAACAGTTTATCAGCGTCTTGCATTACAATGTACTGCAGGTCATAAATTGTCAGTCAGGGTCCCTACCAAACCACTGTTGGAAAAAAGTGGTAGAAATGCCACCAAATATAAAGTGAGATGGAGAAATCTGCAGCAATGTC…	CDH_YDL227C_HO chromosome4:46271-48031 - 692ATGCTTTCTGAAAACACGACTATTCTGATGGCTAACGGTGAAATTAAAGACATCGCAAACGTCACGGCTAACTCTTACGTTATGTGCGCAGATGGCTCCGCTGCCCGCGTCATAAATGTCACACAGGGCTATCAGAAAATCTATAATATACAGCAAAAAACCAAACACAGAGCTTTTGAAGGTGAACCTGGTAGGTTAGATCCCAGGCGTAGAACAGTTTATCAGCGTCTTGCATTACAATGTACTGCAGGTCATAAATTGTCAGTCAGGGTCCCTACCAAACCACTGTTGGAAAAAAGTGGTAGAAATGCCACCAAATATAAAGTGAGATGGAGAAATCTGCAGCAATGTCAGA…	ALA	notfound	notfound	GLY	notfound	notfound	notfound	notfound	LEU	notfound	notfound	LEU	notfound	notfound	notfound	3	Botanical garden, Blagoveshchensk, Russia	CDH	Tree
CDI	no	> CDI_YDL227C_HO chromosome4:46271-48031 - 692 ATGCTTTCTGAAAACACGACTATTCTGATGGCTAACGGTGAAATTAAAGACATCGCAAACGTCACGGCTAACTCTTACGTTATGTGCGCAGATGGCTCCGCTGCCCGCGTCATAAATGTCACACAGGGCTATCAGAAAATCTATAATATACAGCAAAAAACCAAACACAGAGCTTTTGAAGGTGAACCTGGTAGGTTAGATCCCAGGCGTAGAACAGTTTATCAGCGTCTTGCATTACAATGTACTGCAGGTCATAAATTGTCAGTCAGGGTCCCTACCAAACCACTGTTGGAAAAAAGTGGTAGAAATGCCACCAAATATAAAGTGAGATGGAGAAATCTGCAGCAATGTC…	CDI_YDL227C_HO chromosome4:46271-48031 - 692ATGCTTTCTGAAAACACGACTATTCTGATGGCTAACGGTGAAATTAAAGACATCGCAAACGTCACGGCTAACTCTTACGTTATGTGCGCAGATGGCTCCGCTGCCCGCGTCATAAATGTCACACAGGGCTATCAGAAAATCTATAATATACAGCAAAAAACCAAACACAGAGCTTTTGAAGGTGAACCTGGTAGGTTAGATCCCAGGCGTAGAACAGTTTATCAGCGTCTTGCATTACAATGTACTGCAGGTCATAAATTGTCAGTCAGGGTCCCTACCAAACCACTGTTGGAAAAAAGTGGTAGAAATGCCACCAAATATAAAGTGAGATGGAGAAATCTGCAGCAATGTCAGA…	ALA	notfound	notfound	GLY	notfound	notfound	notfound	notfound	LEU	notfound	notfound	LEU	notfound	notfound	notfound	3	Botanical garden, Blagoveshchensk, Russia	CDI	Tree
CDL	no	> CDL_YDL227C_HO chromosome4:46271-48031 - 692 ATGCTTTCTGAAAACACGACTATTCTGATGGCTAACGGTGAAATTAAAGACATCGCAAACGTCACGGCTAACTCTTACGTTATGTGCGCAGATGGCTCCGCTGCCCGCGTCATAAATGTCACACAGGGCTATCAGAAAATCTATAATATACAGCAAAAAACCAAACACAGAGCTTTTGAAGGTGAACCTGGTAGGTTAGATCCCAGGCGTAGAACAGTTTATCAGCGTCTTGCATTACAATGTACTGCAGGTCATAAATTGTCAGTCAGGGTCCCTACCAAACCACTGTTGGAAAAAAGTGGTAGAAATGCCACCAAATATAAAGTGAGATGGAGAAATCTGCAGCAATGTC…	CDL_YDL227C_HO chromosome4:46271-48031 - 692ATGCTTTCTGAAAACACGACTATTCTGATGGCTAACGGTGAAATTAAAGACATCGCAAACGTCACGGCTAACTCTTACGTTATGTGCGCAGATGGCTCCGCTGCCCGCGTCATAAATGTCACACAGGGCTATCAGAAAATCTATAATATACAGCAAAAAACCAAACACAGAGCTTTTGAAGGTGAACCTGGTAGGTTAGATCCCAGGCGTAGAACAGTTTATCAGCGTCTTGCATTACAATGTACTGCAGGTCATAAATTGTCAGTCAGGGTCCCTACCAAACCACTGTTGGAAAAAAGTGGTAGAAATGCCACCAAATATAAAGTGAGATGGAGAAATCTGCAGCAATGTCAGA…	ALA	notfound	notfound	GLY	notfound	notfound	notfound	notfound	LEU	notfound	notfound	LEU	notfound	notfound	notfound	3	Vladivostok, Russian Far East	CDL	Tree
CDP	no	> CDP_YDL227C_HO chromosome4:46271-48031 - 692 ATGCTTTCTGAAAACACGACTATTCTGATGGCTAACGGTGAAATTAAAGACATCGCAAACGTCACGGCTAACTCTTACGTTATGTGCGCAGATGGCTCCGCTGCCCGCGTCATAAATGTCACACAGGGCTATCAGAAAATCTATAATATACAGCAAAAAACCAAACACAGAGCTTTTGAAGGTGAACCTGGTAGGTTAGATCCCAGGCGTAGAACAGTTTATCAGCGTCTTGCATTACAATGTACTGCAGGTCATAAATTGTCAGTCAGGGTCCCTACCAAACCACTGTTGGAAAAAAGTGGTAGAAATGCCACCAAATATAAAGTGAGATGGAGAAATCTGCAGCAATGTC…	CDP_YDL227C_HO chromosome4:46271-48031 - 692ATGCTTTCTGAAAACACGACTATTCTGATGGCTAACGGTGAAATTAAAGACATCGCAAACGTCACGGCTAACTCTTACGTTATGTGCGCAGATGGCTCCGCTGCCCGCGTCATAAATGTCACACAGGGCTATCAGAAAATCTATAATATACAGCAAAAAACCAAACACAGAGCTTTTGAAGGTGAACCTGGTAGGTTAGATCCCAGGCGTAGAACAGTTTATCAGCGTCTTGCATTACAATGTACTGCAGGTCATAAATTGTCAGTCAGGGTCCCTACCAAACCACTGTTGGAAAAAAGTGGTAGAAATGCCACCAAATATAAAGTGAGATGGAGAAATCTGCAGCAATGTCAGA…	ALA	notfound	notfound	GLY	notfound	notfound	notfound	notfound	LEU	notfound	notfound	LEU	notfound	notfound	notfound	3	Augusta, MI 49012, USA	CDP	Tree
CDQ	no	> CDQ_YDL227C_HO chromosome4:46271-48031 - 692 ATGCTTTCTGAAAACACGACTATTCTGATGGCTAACGGTGAAATTAAAGACATCGCAAACGTCACGGCTAACTCTTACGTTATGTGCGCAGATGGCTCCGCTGCCCGCGTCATAAATGTCACACAGGGCTATCAGAAAATCTATAATATACAGCAAAAAACCAAACACAGAGCTTTTGAAGGTGAACCTGGTAGGTTAGATCCCAGGCGTAGAACAGTTTATCAGCGTCTTGCATTACAATGTACTGCAGGTCATAAATTGTCAGTCAGGGTCCCTACCAAACCACTGTTGGAAAAAAGTGGTAGAAATGCCACCAAATATAAAGTGAGATGGAGAAATCTGCAGCAATGTC…	CDQ_YDL227C_HO chromosome4:46271-48031 - 692ATGCTTTCTGAAAACACGACTATTCTGATGGCTAACGGTGAAATTAAAGACATCGCAAACGTCACGGCTAACTCTTACGTTATGTGCGCAGATGGCTCCGCTGCCCGCGTCATAAATGTCACACAGGGCTATCAGAAAATCTATAATATACAGCAAAAAACCAAACACAGAGCTTTTGAAGGTGAACCTGGTAGGTTAGATCCCAGGCGTAGAACAGTTTATCAGCGTCTTGCATTACAATGTACTGCAGGTCATAAATTGTCAGTCAGGGTCCCTACCAAACCACTGTTGGAAAAAAGTGGTAGAAATGCCACCAAATATAAAGTGAGATGGAGAAATCTGCAGCAATGTCAGA…	ALA	notfound	notfound	GLY	notfound	notfound	notfound	notfound	LEU	notfound	notfound	LEU	notfound	notfound	notfound	3	Augusta, MI 49012, USA	CDQ	Tree
CMP	no	> CMP_YDL227C_HO chromosome4:46271-48031 - 692 ATGCTTTCTGAAAACACGACTATTCTGATGGCTAACGGTGAAATTAAAGACATCGCAAACGTCACGGCTAACTCTTACGTTATGTGCGCAGATGGCTCCGCTGCCCGCGTCATAAATGTCACACAGGGCTATCAGAAAATCTATAATATACAGCAAAAAACCAAACACAGAGCTTTTGAAGGTGAACCTGGTAGGTTAGATCCCAGGCGTAGAACAGTTTATCAGCGTCTTGCATTACAATGTACTGCAGGTCATAAATTGTCAGTCAGGGTCCCTACCAAACCATTGTTGGAAAAAAGTGGTAGAAATGCCACCAAATATAAAGTGAGATGGAGAAATCTGCAGCAATGTC…	CMP_YDL227C_HO chromosome4:46271-48031 - 692ATGCTTTCTGAAAACACGACTATTCTGATGGCTAACGGTGAAATTAAAGACATCGCAAACGTCACGGCTAACTCTTACGTTATGTGCGCAGATGGCTCCGCTGCCCGCGTCATAAATGTCACACAGGGCTATCAGAAAATCTATAATATACAGCAAAAAACCAAACACAGAGCTTTTGAAGGTGAACCTGGTAGGTTAGATCCCAGGCGTAGAACAGTTTATCAGCGTCTTGCATTACAATGTACTGCAGGTCATAAATTGTCAGTCAGGGTCCCTACCAAACCATTGTTGGAAAAAAGTGGTAGAAATGCCACCAAATATAAAGTGAGATGGAGAAATCTGCAGCAATGTCAGA…	ALA	notfound	notfound	GLY	notfound	notfound	notfound	notfound	LEU	notfound	notfound	LEU	notfound	notfound	notfound	3	Pennsylvania, USA	CMP	Tree
CMQ	no	> CMQ_YDL227C_HO chromosome4:46271-48031 - 692 ATGCTTTCTGAAAACACGACTATTCTGATGGCTAACGGTGAAATTAAAGACATCGCAAACGTCACGGCTAACTCTTACGTTATGTGCGCAGATGGCTCCGCTGCCCGCGTCATAAATGTCACACAGGGCTATCAGAAAATCTATAATATACAGCAAAAAACCAAACACAGAGCTTTTGAAGGTGAACCTGGTAGGTTAGATCCCAGGCGTAGAACAGTTTATCAGCGTCTTGCATTACAATGTACTGCAGGTCATAAATTGTCAGTCAGGGTCCCTACCAAACCATTGTTGGAAAAAAGTGGTAGAAATGCCACCAAATATAAAGTGAGATGGAGAAATCTGCAGCAATGTC…	CMQ_YDL227C_HO chromosome4:46271-48031 - 692ATGCTTTCTGAAAACACGACTATTCTGATGGCTAACGGTGAAATTAAAGACATCGCAAACGTCACGGCTAACTCTTACGTTATGTGCGCAGATGGCTCCGCTGCCCGCGTCATAAATGTCACACAGGGCTATCAGAAAATCTATAATATACAGCAAAAAACCAAACACAGAGCTTTTGAAGGTGAACCTGGTAGGTTAGATCCCAGGCGTAGAACAGTTTATCAGCGTCTTGCATTACAATGTACTGCAGGTCATAAATTGTCAGTCAGGGTCCCTACCAAACCATTGTTGGAAAAAAGTGGTAGAAATGCCACCAAATATAAAGTGAGATGGAGAAATCTGCAGCAATGTCAGA…	ALA	notfound	notfound	GLY	notfound	notfound	notfound	notfound	LEU	notfound	notfound	LEU	notfound	notfound	notfound	3	Pennsylvania, USA	CMQ	Tree
CMS	no	> CMS_YDL227C_HO chromosome4:46271-48031 - 692 ATGCTTTCTGAAAACACGACTATTCTGATGGCTAACGGTGAAATTAAAGACATCGCAAACGTCACGGCTAACTCTTACGTTATGTGCGCAGATGGCTCCGCTGCCCGCGTCATAAATGTCACACAGGGCTATCAGAAAATCTATAATATACAGCAAAAAACCAAACACAGAGCTTTTGAAGGTGAACCTGGTAGGTTAGATCCCAGGCGTAGAACAGTTTATCAGCGTCTTGCATTACAATGTACTGCAGGTCATAAATTGTCAGTCAGGGTCCCTACCAAACCACTGTTGGAAAAAAGTGGTAGAAATGCCACCAAATATAAAGTGAGATGGAGAAATCTGCAGCAATGTC…	CMS_YDL227C_HO chromosome4:46271-48031 - 692ATGCTTTCTGAAAACACGACTATTCTGATGGCTAACGGTGAAATTAAAGACATCGCAAACGTCACGGCTAACTCTTACGTTATGTGCGCAGATGGCTCCGCTGCCCGCGTCATAAATGTCACACAGGGCTATCAGAAAATCTATAATATACAGCAAAAAACCAAACACAGAGCTTTTGAAGGTGAACCTGGTAGGTTAGATCCCAGGCGTAGAACAGTTTATCAGCGTCTTGCATTACAATGTACTGCAGGTCATAAATTGTCAGTCAGGGTCCCTACCAAACCACTGTTGGAAAAAAGTGGTAGAAATGCCACCAAATATAAAGTGAGATGGAGAAATCTGCAGCAATGTCAGA…	ALA	notfound	notfound	GLY	notfound	notfound	notfound	notfound	LEU	notfound	notfound	LEU	notfound	notfound	notfound	3	Pennsylvania, USA	CMS	Tree
SACE_YBS	no	> SACE_YBS_YDL227C_HO chromosome4:46271-48031 - 692 ATGCTTTCTGAAAACACGACTATTCTGATGGCTAACGGTGAAATTAAAGACATCGCAAACGTCACGGCTAACTCTTACGTTATGTGCGCAGATGGCTCCGCTGCCCGCGTCATAAATGTCACACAGGGCTATCAGAAAATCTATAATATACAGCAAAAAACCAAACACAGAGCTTTTGAAGGTGAACCTGGTAGGTTAGATCCCAGGCGTAGAACAGTTTATCAGCGTCTTGCATTACAATGTACTGCAGGTCATAAATTGTCAGTCAGGGTCCCTACCAAACCACTGTTGGAAAAAAGTGGTAGAAATGCCACCAAATATAAAGTGAGATGGAGAAATCTGCAGCA…	SACE_YBS_YDL227C_HO chromosome4:46271-48031 - 692ATGCTTTCTGAAAACACGACTATTCTGATGGCTAACGGTGAAATTAAAGACATCGCAAACGTCACGGCTAACTCTTACGTTATGTGCGCAGATGGCTCCGCTGCCCGCGTCATAAATGTCACACAGGGCTATCAGAAAATCTATAATATACAGCAAAAAACCAAACACAGAGCTTTTGAAGGTGAACCTGGTAGGTTAGATCCCAGGCGTAGAACAGTTTATCAGCGTCTTGCATTACAATGTACTGCAGGTCATAAATTGTCAGTCAGGGTCCCTACCAAACCACTGTTGGAAAAAAGTGGTAGAAATGCCACCAAATATAAAGTGAGATGGAGAAATCTGCAGCAATG…	ALA	notfound	notfound	GLY	notfound	notfound	notfound	notfound	LEU	notfound	notfound	LEU	notfound	notfound	notfound	3	Pennsylvania, USA	SACE_YBS	Tree
SACE_YCL	no	> SACE_YCL_YDL227C_HO chromosome4:46271-48031 - 692 ATGCTTTCTGAAAACACGACTATTCTGATGGCTAACGGTGAAATTAAAGACATCGCAAACGTCACGGCTAACTCTTACGTTATGTGCGCAGATGGCTCCGCTGCCCGCGTCATAAATGTCACACAGGGCTATCAGAAAATCTATAATATACAGCAAAAAACCAAACACAGAGCTTTTGAAGGTGAACCTGGTAGGTTAGATCCCAGGCGTAGAACAGTTTATCAGCGTCTTGCATTACAATGTACTGCAGGTCATAAATTGTCAGTCAGGGTCCCTACCAAACCACTGTTGGAAAAAAGTGGTAGAAATGCCACCAAATATAAAGTGAGATGGAGAAATCTGCAGCA…	SACE_YCL_YDL227C_HO chromosome4:46271-48031 - 692ATGCTTTCTGAAAACACGACTATTCTGATGGCTAACGGTGAAATTAAAGACATCGCAAACGTCACGGCTAACTCTTACGTTATGTGCGCAGATGGCTCCGCTGCCCGCGTCATAAATGTCACACAGGGCTATCAGAAAATCTATAATATACAGCAAAAAACCAAACACAGAGCTTTTGAAGGTGAACCTGGTAGGTTAGATCCCAGGCGTAGAACAGTTTATCAGCGTCTTGCATTACAATGTACTGCAGGTCATAAATTGTCAGTCAGGGTCCCTACCAAACCACTGTTGGAAAAAAGTGGTAGAAATGCCACCAAATATAAAGTGAGATGGAGAAATCTGCAGCAATG…	ALA	notfound	notfound	GLY	notfound	notfound	notfound	notfound	LEU	notfound	notfound	LEU	notfound	notfound	notfound	3	NA	SACE_YCL	Tree
SACE_YCR	no	> SACE_YCR_YDL227C_HO chromosome4:46271-48031 - 692 ATGCTTTCTGAAAACACGACTATTCTGATGGCTAACGGTGAAATTAAAGACATCGCAAACGTCACGGCTAACTCTTACGTTATGTGCGCAGATGGCTCCGCTGCCCGCGTCATAAATGTCACACAGGGCTATCAGAAAATCTATAATATACAGCAAAAAACCAAACACAGAGCTTTTGAAGGTGAACCTGGTAGGTTAGATCCCAGGCGTAGAACAGTTTATCAGCGTCTTGCATTACAATGTACTGCAGGTCATAAATTGTCAGTCAGGGTCCCTACCAAACCACTGTTGGAAAAAAGTGGTAGAAATGCCACCAAATATAAAGTGAGATGGAGAAATCTGCAGCA…	SACE_YCR_YDL227C_HO chromosome4:46271-48031 - 692ATGCTTTCTGAAAACACGACTATTCTGATGGCTAACGGTGAAATTAAAGACATCGCAAACGTCACGGCTAACTCTTACGTTATGTGCGCAGATGGCTCCGCTGCCCGCGTCATAAATGTCACACAGGGCTATCAGAAAATCTATAATATACAGCAAAAAACCAAACACAGAGCTTTTGAAGGTGAACCTGGTAGGTTAGATCCCAGGCGTAGAACAGTTTATCAGCGTCTTGCATTACAATGTACTGCAGGTCATAAATTGTCAGTCAGGGTCCCTACCAAACCACTGTTGGAAAAAAGTGGTAGAAATGCCACCAAATATAAAGTGAGATGGAGAAATCTGCAGCAATG…	ALA	notfound	notfound	GLY	notfound	notfound	notfound	notfound	LEU	notfound	notfound	LEU	notfound	notfound	notfound	3	Japan	SACE_YCR	Tree
SACE_YCU	no	> SACE_YCU_YDL227C_HO chromosome4:46271-48031 - 692 ATGCTTTCTGAAAACACGACTATTCTGATGGCTAACGGTGAAATTAAAGACATCGCAAACGTCACGGCTAACTCTTACGTTATGTGCGCAGATGGCTCCGCTGCCCGCGTCATAAATGTCACACAGGGCTATCAGAAAATCTATAATATACAGCAAAAAACCAAACACAGAGCTTTTGAAGGTGAACCTGGTAGGTTAGATCCCAGGCGTAGAACAGTTTATCAGCGTCTTGCATTACAATGTACTGCAGGTCATAAATTGTCAGTCAGGGTCCCTACCAAACCACTGTTGGAAAAAAGTGGTAGAAATGCCACCAAATATAAAGTGAGATGGAGAAATCTGCAGCA…	SACE_YCU_YDL227C_HO chromosome4:46271-48031 - 692ATGCTTTCTGAAAACACGACTATTCTGATGGCTAACGGTGAAATTAAAGACATCGCAAACGTCACGGCTAACTCTTACGTTATGTGCGCAGATGGCTCCGCTGCCCGCGTCATAAATGTCACACAGGGCTATCAGAAAATCTATAATATACAGCAAAAAACCAAACACAGAGCTTTTGAAGGTGAACCTGGTAGGTTAGATCCCAGGCGTAGAACAGTTTATCAGCGTCTTGCATTACAATGTACTGCAGGTCATAAATTGTCAGTCAGGGTCCCTACCAAACCACTGTTGGAAAAAAGTGGTAGAAATGCCACCAAATATAAAGTGAGATGGAGAAATCTGCAGCAATG…	ALA	notfound	notfound	GLY	notfound	notfound	notfound	notfound	LEU	notfound	notfound	LEU	notfound	notfound	notfound	3	Pennsylvania, USA	SACE_YCU	Tree
SACE_YCY	no	> SACE_YCY_YDL227C_HO chromosome4:46271-48031 - 692 ATGCTTTCTGAAAACACGACTGTTCTGATGGCTAACGGTGAAATTAAAGACATCGCAAACGTCACGGCTAACTCTTACGTTATGTGCGCAGATGGCTCCGCTGCCCGCGTCATAAATGTCACACAGGGCTATCAGAAAATCTATAATATACAGCAAAAAACCAAACACAGAGCTTTTGAAGGTGAACCTGGTAGGTTAGATCCCAGGCGTAGAACAGTTTATCAGCGTCTTGCATTACAATGTACTGCAGGTCATAAATTGTCAGTCAGGGTCCCTACCAAACCACTGTTGGAAAAAAGTGGTAGAAATGCCACCAAATATAAAGTGAGATGGAGAAATCTGCAGCA…	SACE_YCY_YDL227C_HO chromosome4:46271-48031 - 692ATGCTTTCTGAAAACACGACTGTTCTGATGGCTAACGGTGAAATTAAAGACATCGCAAACGTCACGGCTAACTCTTACGTTATGTGCGCAGATGGCTCCGCTGCCCGCGTCATAAATGTCACACAGGGCTATCAGAAAATCTATAATATACAGCAAAAAACCAAACACAGAGCTTTTGAAGGTGAACCTGGTAGGTTAGATCCCAGGCGTAGAACAGTTTATCAGCGTCTTGCATTACAATGTACTGCAGGTCATAAATTGTCAGTCAGGGTCCCTACCAAACCACTGTTGGAAAAAAGTGGTAGAAATGCCACCAAATATAAAGTGAGATGGAGAAATCTGCAGCAATG…	ALA	notfound	notfound	GLY	notfound	notfound	notfound	notfound	LEU	notfound	notfound	LEU	notfound	notfound	notfound	3	Malaysia	SACE_YCY	Tree
BSK	no	> BSK_YDL227C_HO chromosome4:46271-48031 - 692 ATGCTTTCTGAAAACACGACTATTCTGATGGCTAACGGTGAAATTAAAGACATCGCAAACGTCACGGCTAACTCTTACGTTATGTGCGCAGATGGCTCCGCTGCCCGCGTCATAAATGTCACACAGGGCTATCAGAAAATCTATAATATACAGCAAAAAACCAAACACAGAGCTTTTGAAGGTGAACCTGGTAGGTTAGATCCCAGGCGTAGAACAGTTTATCAGCGTCTTGCATTACAATGTACTGCAGGTCATAAATTGTCAGTCAGGGTCCCTACCAAACCACTGTTGGAAAAAAGTGGTAGAAATGCCACCAAATATAAAGTGAGATGGAGAAATCTGCAGCAATGTC…	BSK_YDL227C_HO chromosome4:46271-48031 - 692ATGCTTTCTGAAAACACGACTATTCTGATGGCTAACGGTGAAATTAAAGACATCGCAAACGTCACGGCTAACTCTTACGTTATGTGCGCAGATGGCTCCGCTGCCCGCGTCATAAATGTCACACAGGGCTATCAGAAAATCTATAATATACAGCAAAAAACCAAACACAGAGCTTTTGAAGGTGAACCTGGTAGGTTAGATCCCAGGCGTAGAACAGTTTATCAGCGTCTTGCATTACAATGTACTGCAGGTCATAAATTGTCAGTCAGGGTCCCTACCAAACCACTGTTGGAAAAAAGTGGTAGAAATGCCACCAAATATAAAGTGAGATGGAGAAATCTGCAGCAATGTCAGA…	ALA	notfound	notfound	GLY	notfound	notfound	notfound	notfound	LEU	notfound	notfound	LEU	notfound	notfound	notfound	3	France	BSK	Unknown
SACE_YDB	no	> SACE_YDB_YDL227C_HO chromosome4:46271-48031 - 692 ATGCTTTCTGAAAACACGACTATTCTGATGGCTAACGGTGAAATTAAAGACATCGCAAACGTCACGGCTAACTCTTACGTTATGTGCGCAGATGGCTCCGCTGCCCGCGTCATAAATGTCACACAGGGCTATCAGAAAATCTATAATATACAGCAAAAAACCAAACACAGAGCTTTTGAAGGTGAACCTGGTAGGTTAGATCCCAGGCGTAGAACAGTTTATCAGCGTCTTGCATTACAATGTACTGCAGGTCATAAATTGTCAGTCAGGGTCCCTACCAAACCACTGTTGGAAAAAAGTGGTAGAAATGCCACCAAATATAAAGTGAGATGGAGAAATCTGCAGCA…	SACE_YDB_YDL227C_HO chromosome4:46271-48031 - 692ATGCTTTCTGAAAACACGACTATTCTGATGGCTAACGGTGAAATTAAAGACATCGCAAACGTCACGGCTAACTCTTACGTTATGTGCGCAGATGGCTCCGCTGCCCGCGTCATAAATGTCACACAGGGCTATCAGAAAATCTATAATATACAGCAAAAAACCAAACACAGAGCTTTTGAAGGTGAACCTGGTAGGTTAGATCCCAGGCGTAGAACAGTTTATCAGCGTCTTGCATTACAATGTACTGCAGGTCATAAATTGTCAGTCAGGGTCCCTACCAAACCACTGTTGGAAAAAAGTGGTAGAAATGCCACCAAATATAAAGTGAGATGGAGAAATCTGCAGCAATG…	ALA	notfound	notfound	GLY	notfound	notfound	notfound	notfound	LEU	notfound	notfound	LEU	notfound	notfound	notfound	3	Africa	SACE_YDB	Unknown
SACE_YDI	no	> SACE_YDI_YDL227C_HO chromosome4:46271-48031 - 692 ATGCTTTCTGAAAACACGACTATTCTGATGGCTAACGGTGAAATTAAAGACATCGCAAACGTCACGGCTAACTCTTACGTTATGTGCGCAGATGGCTCCGCTGCCCGCGTCATAAATGTCACACAGGGCTATCAGAAAATCTATAATATACAGCAAAAAACCAAACACAGAGCTTTTGAAGGTGAACCTGGTAGGTTAGATCCCAGGCGTAGAACAGTTTATCAGCGTCTTGCATTACAATGTACTGCAGGTCATAAATTGTCAGTCAGGGTCCCTACCAAACCACTGTTGGAAAAAAGTGGTAGAAATGCCACCAAATATAAAGTGAGATGGAGAAATCTGCAGCA…	SACE_YDI_YDL227C_HO chromosome4:46271-48031 - 692ATGCTTTCTGAAAACACGACTATTCTGATGGCTAACGGTGAAATTAAAGACATCGCAAACGTCACGGCTAACTCTTACGTTATGTGCGCAGATGGCTCCGCTGCCCGCGTCATAAATGTCACACAGGGCTATCAGAAAATCTATAATATACAGCAAAAAACCAAACACAGAGCTTTTGAAGGTGAACCTGGTAGGTTAGATCCCAGGCGTAGAACAGTTTATCAGCGTCTTGCATTACAATGTACTGCAGGTCATAAATTGTCAGTCAGGGTCCCTACCAAACCACTGTTGGAAAAAAGTGGTAGAAATGCCACCAAATATAAAGTGAGATGGAGAAATCTGCAGCAATG…	ALA	notfound	notfound	GLY	notfound	notfound	notfound	notfound	LEU	notfound	notfound	LEU	notfound	notfound	notfound	3	India	SACE_YDI	Unknown
ALI	no	> ALI_YDL227C_HO chromosome4:46271-48031 - 692 ATGCTTTCTGAAAACACGACTATTCTGATGGCTAACGGTGAAATTAAAGACATCGCAAACGTCACGGCTAACTCTTACGTTATGTGCGCAGATGGCTCCGCTGCCCGCGTCATAAATGTCACACAGGGCTATCAGAAAATCTATAATATACAGCAAAAAACCAAACACAGAGCTTTTGAAGGTGAACCTGGTAGGTTAGATCCCAGGCGTAGAACAGTTTATCAGCGTCTTGCATAACAATGTACTGCAGGTCATAAATTGTCAGTCAGGGTCCCTACCAAACCACTGTTGGAAAAAAGTGGTAGAAATGCCACCAAATATAAAGTGAGATGGAGAAATCTGCAGCAATGTC…	ALI_YDL227C_HO chromosome4:46271-48031 - 692ATGCTTTCTGAAAACACGACTATTCTGATGGCTAACGGTGAAATTAAAGACATCGCAAACGTCACGGCTAACTCTTACGTTATGTGCGCAGATGGCTCCGCTGCCCGCGTCATAAATGTCACACAGGGCTATCAGAAAATCTATAATATACAGCAAAAAACCAAACACAGAGCTTTTGAAGGTGAACCTGGTAGGTTAGATCCCAGGCGTAGAACAGTTTATCAGCGTCTTGCATAACAATGTACTGCAGGTCATAAATTGTCAGTCAGGGTCCCTACCAAACCACTGTTGGAAAAAAGTGGTAGAAATGCCACCAAATATAAAGTGAGATGGAGAAATCTGCAGCAATGTCAGA…	ALA	notfound	notfound	GLY	notfound	notfound	notfound	notfound	LEU	notfound	notfound	LEU	notfound	notfound	notfound	3	Yasuni National Park, Orellana, Ecuador	ALI	Water
ANA	no	> ANA_YDL227C_HO chromosome4:46271-48031 - 692 ATGCTTTCTGAAAACACGACTATTCTGATGGCTAACGGTGAAATTAAAGACATCGCAAACGTCACGGCTAACTCTTACGTTATGTGCGCAGATGGCTCCGCTGCCCGCGTCATAAATGTCACACAGGGCTATCAGAAAATCTATAATATACAGCAAAAAACCAAACACAGAGCTTTTGAAGGTGAACCTGGTAGGTTAGATCCCAGGCGTAGAACAGTTTATCAGCGTCTTGCATTACAATGTACTGCAGGTCATAAATTGTCAGTCAGGGTCCCTACCAAACCACTGTTGGAAAAAAGTGGTAGAAATGCCACCAAATATAAAGTGAGATGGAGAAATCTGCAGCAATGTC…	ANA_YDL227C_HO chromosome4:46271-48031 - 692ATGCTTTCTGAAAACACGACTATTCTGATGGCTAACGGTGAAATTAAAGACATCGCAAACGTCACGGCTAACTCTTACGTTATGTGCGCAGATGGCTCCGCTGCCCGCGTCATAAATGTCACACAGGGCTATCAGAAAATCTATAATATACAGCAAAAAACCAAACACAGAGCTTTTGAAGGTGAACCTGGTAGGTTAGATCCCAGGCGTAGAACAGTTTATCAGCGTCTTGCATTACAATGTACTGCAGGTCATAAATTGTCAGTCAGGGTCCCTACCAAACCACTGTTGGAAAAAAGTGGTAGAAATGCCACCAAATATAAAGTGAGATGGAGAAATCTGCAGCAATGTCAGA…	ALA	notfound	notfound	GLY	notfound	notfound	notfound	notfound	LEU	notfound	notfound	LEU	notfound	notfound	notfound	3	Burundi	ANA	Wine
ARP	no	> ARP_YDL227C_HO chromosome4:46271-48031 - 692 ATGCTTTCTGAAAACACGACTATTCTGATGGCTAACGGTGAAATTAAAGACATCGCAAACGTCACGGCTAACTCTTACGTTATGTGCGCAGATGGCTCCGCTGCCCGCGTCATAAATGTCACACAGGGCTATCAGAAAATCTATAATATACAGCAAAAAACCAAACACAGAGCTTTTGAAGGTGAACCTGGTAGGTTAGATCCCAGGCGTAGAACAGTTTATCAGCGTCTTGCATTACAATGTACTGCAGGTCATAAATTGTCAGTCAGGGTCCCTACCAAACCACTGTTGGAAAAAAGTGGTAGAAATGCCACCAAATATAAAGTGAGATGGAGAAATCTGCAGCAATGTC…	ARP_YDL227C_HO chromosome4:46271-48031 - 692ATGCTTTCTGAAAACACGACTATTCTGATGGCTAACGGTGAAATTAAAGACATCGCAAACGTCACGGCTAACTCTTACGTTATGTGCGCAGATGGCTCCGCTGCCCGCGTCATAAATGTCACACAGGGCTATCAGAAAATCTATAATATACAGCAAAAAACCAAACACAGAGCTTTTGAAGGTGAACCTGGTAGGTTAGATCCCAGGCGTAGAACAGTTTATCAGCGTCTTGCATTACAATGTACTGCAGGTCATAAATTGTCAGTCAGGGTCCCTACCAAACCACTGTTGGAAAAAAGTGGTAGAAATGCCACCAAATATAAAGTGAGATGGAGAAATCTGCAGCAATGTCAGA…	ALA	notfound	notfound	GLY	notfound	notfound	notfound	notfound	LEU	notfound	notfound	LEU	notfound	notfound	notfound	3	Japan	ARP	Wine
BIE	no	> BIE_YDL227C_HO chromosome4:46271-48031 - 692 ATGCTTTCTGAAAACACGACTATTCTGATGGCTAACGGTGAAATTAAAGACATCGCAAACGTCACGGCTAACTCTTACGTTATGTGCGCAGATGGCTCCGCTGCCCGCGTCATAAATGTCACACAGGGCTATCAGAAAATCTATAATATACAGCAAAAAACTAAACACAGAGCTTTTGAAGGTGAACCTGGTAGGTTAGATCCCAGGCGTAGAACAGTTTATCAGAGTCTTGCATTACAATGTACTGCAGGTCATAAATTGTCAGTCAGGGTCCCTACAAAACCACTGTTGGAAAAAAGTGGTAGAAATGCCACCAAATATAAAGTGAGATGGAGAAATCTGCAGCAATGTC…	BIE_YDL227C_HO chromosome4:46271-48031 - 692ATGCTTTCTGAAAACACGACTATTCTGATGGCTAACGGTGAAATTAAAGACATCGCAAACGTCACGGCTAACTCTTACGTTATGTGCGCAGATGGCTCCGCTGCCCGCGTCATAAATGTCACACAGGGCTATCAGAAAATCTATAATATACAGCAAAAAACTAAACACAGAGCTTTTGAAGGTGAACCTGGTAGGTTAGATCCCAGGCGTAGAACAGTTTATCAGAGTCTTGCATTACAATGTACTGCAGGTCATAAATTGTCAGTCAGGGTCCCTACAAAACCACTGTTGGAAAAAAGTGGTAGAAATGCCACCAAATATAAAGTGAGATGGAGAAATCTGCAGCAATGTCAGA…	ALA	notfound	notfound	GLY	notfound	notfound	notfound	notfound	LEU	notfound	notfound	LEU	notfound	notfound	notfound	3	San Severo, Puglia, Italy	BIE	Wine
BPN	no	> BPN_YDL227C_HO chromosome4:46271-48031 - 692 ATGCTTTCTGAAAACACGACTATTCTGATGGCTAACGGTGAAATTAAAGACATCGCAAACGTCACGGCTAACTCTTACGTTATGTGCGCAGATGGCTCCGCTGCCCGCGTCATAAATGTCACACAGGGCTATCAGAAAATCTATAATATACAGCAAAAAACCAAACACAGAGCTTTTGAAGGTGAACCTGGTAGGTTAGATCCCAGGCGTAGAACAGTTTATCAGCGTCTTGCATTACAATGTACTGCAGGTCATAAATTGTCAGTCAGGGTCCCTACCAAACCACTGTTGGAAAAAAGTGGTAGAAATGCCACCAAATATAAAGTGAGATGGAGAAATCTGCAGCAATGTC…	BPN_YDL227C_HO chromosome4:46271-48031 - 692ATGCTTTCTGAAAACACGACTATTCTGATGGCTAACGGTGAAATTAAAGACATCGCAAACGTCACGGCTAACTCTTACGTTATGTGCGCAGATGGCTCCGCTGCCCGCGTCATAAATGTCACACAGGGCTATCAGAAAATCTATAATATACAGCAAAAAACCAAACACAGAGCTTTTGAAGGTGAACCTGGTAGGTTAGATCCCAGGCGTAGAACAGTTTATCAGCGTCTTGCATTACAATGTACTGCAGGTCATAAATTGTCAGTCAGGGTCCCTACCAAACCACTGTTGGAAAAAAGTGGTAGAAATGCCACCAAATATAAAGTGAGATGGAGAAATCTGCAGCAATGTCAGA…	ALA	notfound	notfound	GLY	notfound	notfound	notfound	notfound	LEU	notfound	notfound	LEU	notfound	notfound	notfound	3	Italy	BPN	Wine
CDG	no	> CDG_YDL227C_HO chromosome4:46271-48031 - 692 ATGCTTTCTGAAAACACGACTATTCTGATGGCTAACGGTGAAATTAAAGACATCGCAAACGTCACGGCTAACTCTTACGTTATGTGCGCAGATGGCTCCGCTGCCCGCGTCATAAATGTCACACAGGGCTATCAGAAAATCTATAATATACAGCAAAAAACCAAACACAGAGCTTTTGAAGGTGAACCTGGTAGGTTAGATCCCAGGCGTAGAACAGTTTATCAGCGTCTTGCATTACAATGTACTGCAGGTCATAAATTGTCAGTCAGGGTCCCTACCAAACCACTGTTGGAAAAAAGTGGTAGAAATGCCACCAAATATAAAGTGAGATGGAGAAATCTGCAGCAATGTC…	CDG_YDL227C_HO chromosome4:46271-48031 - 692ATGCTTTCTGAAAACACGACTATTCTGATGGCTAACGGTGAAATTAAAGACATCGCAAACGTCACGGCTAACTCTTACGTTATGTGCGCAGATGGCTCCGCTGCCCGCGTCATAAATGTCACACAGGGCTATCAGAAAATCTATAATATACAGCAAAAAACCAAACACAGAGCTTTTGAAGGTGAACCTGGTAGGTTAGATCCCAGGCGTAGAACAGTTTATCAGCGTCTTGCATTACAATGTACTGCAGGTCATAAATTGTCAGTCAGGGTCCCTACCAAACCACTGTTGGAAAAAAGTGGTAGAAATGCCACCAAATATAAAGTGAGATGGAGAAATCTGCAGCAATGTCAGA…	ALA	notfound	notfound	GLY	notfound	notfound	notfound	notfound	LEU	notfound	notfound	LEU	notfound	notfound	notfound	3	Botanical garden, Blagoveshchensk, Russia	CDG	Wine
SACE_YBP	no	> SACE_YBP_YDL227C_HO chromosome4:46271-48031 - 692 ATGCTTTCTGAAAACACGACTATTCTGATGGCTAACGGTGAAATTAAAGACATCGCAAACGTCACGGCTAACTCTTACGTTATGTGCGCAGATGGCTCCGCTGCCCGCGTCATAAATGTCACACAGGGCTATCAGAAAATCTATAATATACAGCAAAAAACCAAACACAGAGCTTTTGAAGGTGAACCTGGTAGGTTAGATCCCAGGCGTAGAACAGTTTATCAGCGTCTTGCATTACAATGTACTGCAGGTCATAAATTGTCAGTCAGGGTCCCTACCAAACCACTGTTGGAAAAAAGTGGTAGAAATGCCACCAAATATAAAGTGAGATGGAGAAATCTGCAGCA…	SACE_YBP_YDL227C_HO chromosome4:46271-48031 - 692ATGCTTTCTGAAAACACGACTATTCTGATGGCTAACGGTGAAATTAAAGACATCGCAAACGTCACGGCTAACTCTTACGTTATGTGCGCAGATGGCTCCGCTGCCCGCGTCATAAATGTCACACAGGGCTATCAGAAAATCTATAATATACAGCAAAAAACCAAACACAGAGCTTTTGAAGGTGAACCTGGTAGGTTAGATCCCAGGCGTAGAACAGTTTATCAGCGTCTTGCATTACAATGTACTGCAGGTCATAAATTGTCAGTCAGGGTCCCTACCAAACCACTGTTGGAAAAAAGTGGTAGAAATGCCACCAAATATAAAGTGAGATGGAGAAATCTGCAGCAATG…	ALA	notfound	notfound	GLY	notfound	notfound	notfound	notfound	LEU	notfound	notfound	LEU	notfound	notfound	notfound	3	West Africa	SACE_YBP	Wine
SACE_YCO	no	> SACE_YCO_YDL227C_HO chromosome4:46271-48031 - 692 ATGCTTTCTGAAAACACGACTATTCTGATGGCTAACGGTGAAATTAAAGACATCGCAAACGTCACGGCTAACTCTTACGTTATGTGCGCAGATGGCTCCGCTGCCCGCGTCATAAATGTCACACAGGGCTATCAGAAAATCTATAATATACAGCAAAAAACCAAACACAGAGCTTTTGAAGGTGAACCTGGTAGGTTAGATCCCAGGCGTAGAACAGTTTATCAGCGTCTTGCATTACAATGTACTGCAGGTCATAAATTGTCAGTCAGGGTCCCTACCAAACCACTGTTGGAAAAAAGTGGTAGAAATGCCACCAAATATAAAGTGAGATGGAGAAATCTGCAGCA…	SACE_YCO_YDL227C_HO chromosome4:46271-48031 - 692ATGCTTTCTGAAAACACGACTATTCTGATGGCTAACGGTGAAATTAAAGACATCGCAAACGTCACGGCTAACTCTTACGTTATGTGCGCAGATGGCTCCGCTGCCCGCGTCATAAATGTCACACAGGGCTATCAGAAAATCTATAATATACAGCAAAAAACCAAACACAGAGCTTTTGAAGGTGAACCTGGTAGGTTAGATCCCAGGCGTAGAACAGTTTATCAGCGTCTTGCATTACAATGTACTGCAGGTCATAAATTGTCAGTCAGGGTCCCTACCAAACCACTGTTGGAAAAAAGTGGTAGAAATGCCACCAAATATAAAGTGAGATGGAGAAATCTGCAGCAATG…	ALA	notfound	notfound	GLY	notfound	notfound	notfound	notfound	LEU	notfound	notfound	LEU	notfound	notfound	notfound	3	NA	SACE_YCO	Wine
CHS	no	> CHS_YDL227C_HO chromosome4:46271-48031 - 692 ATGCTTTCTGAAAACACGACTATTCTGATGGCTAACGGTGAAATTAAAGACATCGCAAACGTCACGGCTAACTCTTACGTTATGTGCGCAGATGGCTCCGCTGCCCGCGTCATAAATGTCACACAGGGCTATCAGAAAATCTATAATATACAGCAAAAAACCAAACACAGAGCTTTTGAAGGTGAACCTGGTAGGTTAGATCCCAGGCGTAGAACAGTTTATCAGCGTCTTGCATTACAATGTACTGCAGGTCATAAATTGTCAGTCAGGGTCCCTACCAAACCACTGTTGGAAAAAAGTGGTAGAAATGCCACCAAATATAAAGTGAGATGGAGAAATCTGCAGCAATGTC…	CHS_YDL227C_HO chromosome4:46271-48031 - 692ATGCTTTCTGAAAACACGACTATTCTGATGGCTAACGGTGAAATTAAAGACATCGCAAACGTCACGGCTAACTCTTACGTTATGTGCGCAGATGGCTCCGCTGCCCGCGTCATAAATGTCACACAGGGCTATCAGAAAATCTATAATATACAGCAAAAAACCAAACACAGAGCTTTTGAAGGTGAACCTGGTAGGTTAGATCCCAGGCGTAGAACAGTTTATCAGCGTCTTGCATTACAATGTACTGCAGGTCATAAATTGTCAGTCAGGGTCCCTACCAAACCACTGTTGGAAAAAAGTGGTAGAAATGCCACCAAATATAAAGTGAGATGGAGAAATCTGCAGCAATGTCAGA…	ALA	notfound	notfound	GLY	notfound	notfound	notfound	notfound	LEU	notfound	notfound	notfound	HIS	notfound	36	4	France	CHS	Human, clinical
CHT	no	> CHT_YDL227C_HO chromosome4:46271-48031 - 692 ATGCTTTCTGAAAACACGACTATTCTGATGGCTAACGGTGAAATTAAAGACATCGCAAACGTCACGGCTAACTCTTACGTTATGTGCGCAGATGGCTCCGCTGCCCGCGTCATAAATGTCACACAGGGCTATCAGAAAATCTATAATATACAGCAAAAAACCAAACACAGAGCTTTTGAAGGTGAACCTGGTAGGTTAGATCCCAGGCGTAGAACAGTTTATCAGCGTCTTGCATTACAATGTACTGCAGGTCATAAATTGTCAGTCAGGGTCCCTACCAAACCACTGTTGGAAAAAAGTGGTAGAAATGCCACCAAATATAAAGTGAGATGGAGAAATCTGCAGCAATGTC…	CHT_YDL227C_HO chromosome4:46271-48031 - 692ATGCTTTCTGAAAACACGACTATTCTGATGGCTAACGGTGAAATTAAAGACATCGCAAACGTCACGGCTAACTCTTACGTTATGTGCGCAGATGGCTCCGCTGCCCGCGTCATAAATGTCACACAGGGCTATCAGAAAATCTATAATATACAGCAAAAAACCAAACACAGAGCTTTTGAAGGTGAACCTGGTAGGTTAGATCCCAGGCGTAGAACAGTTTATCAGCGTCTTGCATTACAATGTACTGCAGGTCATAAATTGTCAGTCAGGGTCCCTACCAAACCACTGTTGGAAAAAAGTGGTAGAAATGCCACCAAATATAAAGTGAGATGGAGAAATCTGCAGCAATGTCAGA…	ALA	notfound	notfound	GLY	notfound	notfound	notfound	notfound	LEU	notfound	notfound	notfound	HIS	notfound	36	4	France	CHT	Human, clinical
CPD	no	> CPD_YDL227C_HO chromosome4:46271-48031 - 692 ATGCTTTCTGAAAACACGACTATTCTGATGGCTAACGGTGAAATTAAAGACATCGCAAACGTCACGGCTAACTCTTACGTTATGTGCGCAGATGGCTCCGCTGCCCGCGTCATAAATGTCACACAGGGCTATCAGAAAATCTATAATATACAGCAAAAAACCAAACACAGAGCTTTTGAAGGTGAACCTGGTAGGTTAGATCCCAGGCGTAGAACAGTTTATCAGCGTCTTGCATTACAATGTACTGCAGGTCATAAATTGTCAGTCAGGGTCCCTACCAAACCACTGTTGGAAAAAAGTGGTAGAAATGCCACCAAATATAAAGTGAGATGGAGAAATCTGCAGCAATGTC…	CPD_YDL227C_HO chromosome4:46271-48031 - 692ATGCTTTCTGAAAACACGACTATTCTGATGGCTAACGGTGAAATTAAAGACATCGCAAACGTCACGGCTAACTCTTACGTTATGTGCGCAGATGGCTCCGCTGCCCGCGTCATAAATGTCACACAGGGCTATCAGAAAATCTATAATATACAGCAAAAAACCAAACACAGAGCTTTTGAAGGTGAACCTGGTAGGTTAGATCCCAGGCGTAGAACAGTTTATCAGCGTCTTGCATTACAATGTACTGCAGGTCATAAATTGTCAGTCAGGGTCCCTACCAAACCACTGTTGGAAAAAAGTGGTAGAAATGCCACCAAATATAAAGTGAGATGGAGAAATCTGCAGCAATGTCAGA…	ALA	notfound	notfound	GLY	notfound	notfound	notfound	notfound	LEU	notfound	notfound	notfound	HIS	notfound	notfound	5	NA	CPD	Beer
BVA	no	> BVA_YDL227C_HO chromosome4:46271-48031 - 692 ATGCTTTCTGAAAACACGACTATTCTGATGGCTAACGGTGAAATTAAAGACATCGCAAACGTCACGGCTAACTCTTACGTTATGTGCGCAGATGGCTCCGCTGCCCGCGTCATAAATGTCACACAGGGCTATCAGAAAATCTATAATATACAGCAAAAAACCAAACACAGAGCTTTTGAAGGTGAACCTGGTAGGTTAGATCCCAGGCGTAGAACAGTTTATCAGCGTCTTGCATTACAATGTACTGCAGGTCATAAATTGTCAGTCAGGGTCCCTACCAAACCACTGTTGGAAAAAAGTGGTAGAAATGCCACCAAATATAAAGTGAGATGGAGAAATCTGCAGCAATGTC…	BVA_YDL227C_HO chromosome4:46271-48031 - 692ATGCTTTCTGAAAACACGACTATTCTGATGGCTAACGGTGAAATTAAAGACATCGCAAACGTCACGGCTAACTCTTACGTTATGTGCGCAGATGGCTCCGCTGCCCGCGTCATAAATGTCACACAGGGCTATCAGAAAATCTATAATATACAGCAAAAAACCAAACACAGAGCTTTTGAAGGTGAACCTGGTAGGTTAGATCCCAGGCGTAGAACAGTTTATCAGCGTCTTGCATTACAATGTACTGCAGGTCATAAATTGTCAGTCAGGGTCCCTACCAAACCACTGTTGGAAAAAAGTGGTAGAAATGCCACCAAATATAAAGTGAGATGGAGAAATCTGCAGCAATGTCAGA…	ALA	notfound	notfound	GLY	notfound	notfound	notfound	notfound	LEU	notfound	notfound	notfound	HIS	notfound	notfound	5	Brazil	BVA	Bioethanol
BVD	no	> BVD_YDL227C_HO chromosome4:46271-48031 - 692 ATGCTTTCTGAAAACACGACTATTCTGATGGCTAACGGTGAAATTAAAGACATCGCAAACGTCACGGCTAACTCTTACGTTATGTGCGCAGATGGCTCCGCTGCCCGCGTCATAAATGTCACACAGGGCTATCAGAAAATCTATAATATACAGCAAAAAACCAAACACAGAGCTTTTGAAGGTGAACCTGGTAGGTTAGATCCCAGGCGTAGAACAGTTTATCAGCGTCTTGCATTACAATGTACTGCAGGTCATAAATTGTCAGTCAGGGTCCCTACCAAACCACTGTTGGAAAAAAGTGGTAGAAATGCCACCAAATATAAAGTGAGATGGAGAAATCTGCAGCAATGTC…	BVD_YDL227C_HO chromosome4:46271-48031 - 692ATGCTTTCTGAAAACACGACTATTCTGATGGCTAACGGTGAAATTAAAGACATCGCAAACGTCACGGCTAACTCTTACGTTATGTGCGCAGATGGCTCCGCTGCCCGCGTCATAAATGTCACACAGGGCTATCAGAAAATCTATAATATACAGCAAAAAACCAAACACAGAGCTTTTGAAGGTGAACCTGGTAGGTTAGATCCCAGGCGTAGAACAGTTTATCAGCGTCTTGCATTACAATGTACTGCAGGTCATAAATTGTCAGTCAGGGTCCCTACCAAACCACTGTTGGAAAAAAGTGGTAGAAATGCCACCAAATATAAAGTGAGATGGAGAAATCTGCAGCAATGTCAGA…	ALA	notfound	notfound	GLY	notfound	notfound	notfound	notfound	LEU	notfound	notfound	notfound	HIS	notfound	notfound	5	Brazil	BVD	Bioethanol
BVE	no	> BVE_YDL227C_HO chromosome4:46271-48031 - 692 ATGCTTTCTGAAAACACGACTATTCTGATGGCTAACGGTGAAATTAAAGACATCGCAAACGTCACGGCTAACTCTTACGTTATGTGCGCAGATGGCTCCGCTGCCCGCGTCATAAATGTCACACAGGGCTATCAGAAAATCTATAATATACAGCAAAAAACCAAACACAGAGCTTTTGAAGGTGAACCTGGTAGGTTAGATCCCAGGCGTAGAACAGTTTATCAGCGTCTTGCATTACAATGTACTGCAGGTCATAAATTGTCAGTCAGGGTCCCTACCAAACCACTGTTGGAAAAAAGTGGTAGAAATGCCACCAAATATAAAGTGAGATGGAGAAATCTGCAGCAATGTC…	BVE_YDL227C_HO chromosome4:46271-48031 - 692ATGCTTTCTGAAAACACGACTATTCTGATGGCTAACGGTGAAATTAAAGACATCGCAAACGTCACGGCTAACTCTTACGTTATGTGCGCAGATGGCTCCGCTGCCCGCGTCATAAATGTCACACAGGGCTATCAGAAAATCTATAATATACAGCAAAAAACCAAACACAGAGCTTTTGAAGGTGAACCTGGTAGGTTAGATCCCAGGCGTAGAACAGTTTATCAGCGTCTTGCATTACAATGTACTGCAGGTCATAAATTGTCAGTCAGGGTCCCTACCAAACCACTGTTGGAAAAAAGTGGTAGAAATGCCACCAAATATAAAGTGAGATGGAGAAATCTGCAGCAATGTCAGA…	ALA	notfound	notfound	GLY	notfound	notfound	notfound	notfound	LEU	notfound	notfound	notfound	HIS	notfound	notfound	5	Brazil	BVE	Bioethanol
CNI	no	> CNI_YDL227C_HO chromosome4:46271-48031 - 692 ATGCTTTCTGAAAACACGACTATTCTGATGGCTAACGGTGAAATTAAAGACATCGCAAACGTCACGGCTAACTCTTACGTTATGTGCGCAGATGGCTCCGCTGCCCGCGTCATAAATGTCACACAGGGCTATCAGAAAATCTATAATATACAGCAAAAAACCAAACACAGAGCTTTTGAAGGTGAACCTGGTAGGTTAGATCCCAGGCGTAGAACAGTTTATCAGCGTCTTGCATTACAATGTACTGCAGGTCATAAATTGTCAGTCAGGGTCCCTACCAAACCACTGTTGGAAAAAAGTGGTAGAAATGCCACCAAATATAAAGTGAGATGGAGAAATCTGCAGCAATGTC…	CNI_YDL227C_HO chromosome4:46271-48031 - 692ATGCTTTCTGAAAACACGACTATTCTGATGGCTAACGGTGAAATTAAAGACATCGCAAACGTCACGGCTAACTCTTACGTTATGTGCGCAGATGGCTCCGCTGCCCGCGTCATAAATGTCACACAGGGCTATCAGAAAATCTATAATATACAGCAAAAAACCAAACACAGAGCTTTTGAAGGTGAACCTGGTAGGTTAGATCCCAGGCGTAGAACAGTTTATCAGCGTCTTGCATTACAATGTACTGCAGGTCATAAATTGTCAGTCAGGGTCCCTACCAAACCACTGTTGGAAAAAAGTGGTAGAAATGCCACCAAATATAAAGTGAGATGGAGAAATCTGCAGCAATGTCAGA…	ALA	notfound	notfound	GLY	notfound	notfound	notfound	notfound	LEU	notfound	notfound	notfound	HIS	notfound	notfound	5	Brazil	CNI	Bioethanol
BHE	no	> BHE_YDL227C_HO chromosome4:46271-48031 - 692 ATGCTTTCTGAAAACACGACTATTCTGATGGCTAACGGTGAAATTAAAGACATCGCAAACGTCACGGCTAACTCTTACGTTATGTGCGCAGATGGCTCCGCTGCCCGCGTCATAAATGTCACACAGGGCTATCAGAAAATCTATAATATACAGCAAAAAACCAAACACAGAGCTTTTGAAGGTGAACCTGGTAGGTTAGATCCCAGGCGTAGAACAGTTTATCAGCGTCTTGCATTACAATGTACTGCAGGTCATAAATTGTCAGTCAGGGTCCCTACCAAACCACTGTTGGAAAAAAGTGGTAGAAATGCCACCAAATATAAAGTGAGATGGAGAAATCTGCAGCAATGTC…	BHE_YDL227C_HO chromosome4:46271-48031 - 692ATGCTTTCTGAAAACACGACTATTCTGATGGCTAACGGTGAAATTAAAGACATCGCAAACGTCACGGCTAACTCTTACGTTATGTGCGCAGATGGCTCCGCTGCCCGCGTCATAAATGTCACACAGGGCTATCAGAAAATCTATAATATACAGCAAAAAACCAAACACAGAGCTTTTGAAGGTGAACCTGGTAGGTTAGATCCCAGGCGTAGAACAGTTTATCAGCGTCTTGCATTACAATGTACTGCAGGTCATAAATTGTCAGTCAGGGTCCCTACCAAACCACTGTTGGAAAAAAGTGGTAGAAATGCCACCAAATATAAAGTGAGATGGAGAAATCTGCAGCAATGTCAGA…	ALA	notfound	notfound	GLY	notfound	notfound	notfound	notfound	LEU	notfound	notfound	notfound	HIS	notfound	notfound	5	Brittany, France	BHE	Cider
BHK	no	> BHK_YDL227C_HO chromosome4:46271-48031 - 692 ATGCTTTCTGAAAACACGACTATTCTGATGGCTAACGGTGAAATTAAAGACATCGCAAACGTCACGGCTAACTCTTACGTTATGTGCGCAGATGGCTCCGCTGCCCGCGTCATAAATGTCACACAGGGCTATCAGAAAATCTATAATATACAGCAAAAAACCAAACACAGAGCTTTTGAAGGTGAACCTGGTAGGTTAGATCCCAGGCGTAGAACAGTTTATCAGCGTCTTGCATTACAATGTACTGCAGGTCATAAATTGTCAGTCAGGGTCCCTACCAAACCACTGTTGGAAAAAAGTGGTAGAAATGCCACCAAATATAAAGTGAGATGGAGAAATCTGCAGCAATGTC…	BHK_YDL227C_HO chromosome4:46271-48031 - 692ATGCTTTCTGAAAACACGACTATTCTGATGGCTAACGGTGAAATTAAAGACATCGCAAACGTCACGGCTAACTCTTACGTTATGTGCGCAGATGGCTCCGCTGCCCGCGTCATAAATGTCACACAGGGCTATCAGAAAATCTATAATATACAGCAAAAAACCAAACACAGAGCTTTTGAAGGTGAACCTGGTAGGTTAGATCCCAGGCGTAGAACAGTTTATCAGCGTCTTGCATTACAATGTACTGCAGGTCATAAATTGTCAGTCAGGGTCCCTACCAAACCACTGTTGGAAAAAAGTGGTAGAAATGCCACCAAATATAAAGTGAGATGGAGAAATCTGCAGCAATGTCAGA…	ALA	notfound	notfound	GLY	notfound	notfound	notfound	notfound	LEU	notfound	notfound	notfound	HIS	notfound	notfound	5	Upper Normandy, France	BHK	Cider
BHT	no	> BHT_YDL227C_HO chromosome4:46271-48031 - 692 ATGCTTTCTGAAAACACGACTATTCTGATGGCTAACGGTGAAATTAAAGACATCGCAAACGTCACGGCTAACTCTTACGTTATGTGCGCAGATGGCTCCGCTGCCCGCGTCATAAATGTCACACAGGGCTATCAGAAAATCTATAATATACAGCAAAAAACCAAACACAGAGCTTTTGAAGGTGAACCTGGTAGGTTAGATCCCAGGCGTAGAACAGTTTATCAGCGTCTTGCATTACAATGTACTGCAGGTCATAAATTGTCAGTCAGGGTCCCTACCAAACCACTGTTGGAAAAAAGTGGTAGAAATGCCACCAAATATAAAGTGAGATGGAGAAATCTGCAGCAATGTC…	BHT_YDL227C_HO chromosome4:46271-48031 - 692ATGCTTTCTGAAAACACGACTATTCTGATGGCTAACGGTGAAATTAAAGACATCGCAAACGTCACGGCTAACTCTTACGTTATGTGCGCAGATGGCTCCGCTGCCCGCGTCATAAATGTCACACAGGGCTATCAGAAAATCTATAATATACAGCAAAAAACCAAACACAGAGCTTTTGAAGGTGAACCTGGTAGGTTAGATCCCAGGCGTAGAACAGTTTATCAGCGTCTTGCATTACAATGTACTGCAGGTCATAAATTGTCAGTCAGGGTCCCTACCAAACCACTGTTGGAAAAAAGTGGTAGAAATGCCACCAAATATAAAGTGAGATGGAGAAATCTGCAGCAATGTCAGA…	ALA	notfound	notfound	GLY	notfound	notfound	notfound	notfound	LEU	notfound	notfound	notfound	HIS	notfound	notfound	5	Upper Normandy, France	BHT	Cider
CHV	no	> CHV_YDL227C_HO chromosome4:46271-48031 - 692 ATGCTTTCTGAAAACACGACTATTCTGATGGCTAACGGTGAAATTAAAGACATCGCAAACGTCACGGCTAACTCTTACGTTATGTGCGCAGATGGCTCCGCTGCCCGCGTCATAAATGTCACACAGGGCTATCAGAAAATCTATAATATACAGCAAAAAACCAAACACAGAGCTTTTGAAGGTGAACCTGGTAGGTTAGATCCCAGGCGTAGAACAGTTTATCAGCGTCTTGCATTACAATGTACTGCAGGTCATAAATTGTCAGTCAGGGTCCCTACCAAACCACTGTTGGAAAAAAGTGGTAGAAATGCCACCAAATATAAAGTGAGATGGAGAAATCTGCAGCAATGTC…	CHV_YDL227C_HO chromosome4:46271-48031 - 692ATGCTTTCTGAAAACACGACTATTCTGATGGCTAACGGTGAAATTAAAGACATCGCAAACGTCACGGCTAACTCTTACGTTATGTGCGCAGATGGCTCCGCTGCCCGCGTCATAAATGTCACACAGGGCTATCAGAAAATCTATAATATACAGCAAAAAACCAAACACAGAGCTTTTGAAGGTGAACCTGGTAGGTTAGATCCCAGGCGTAGAACAGTTTATCAGCGTCTTGCATTACAATGTACTGCAGGTCATAAATTGTCAGTCAGGGTCCCTACCAAACCACTGTTGGAAAAAAGTGGTAGAAATGCCACCAAATATAAAGTGAGATGGAGAAATCTGCAGCAATGTCAGA…	ALA	notfound	notfound	GLY	notfound	notfound	notfound	notfound	LEU	notfound	notfound	notfound	HIS	notfound	notfound	5	France	CHV	Cider
APH	no	> APH_YDL227C_HO chromosome4:46271-48031 - 692 ATGCTTTCTGAAAACACGACTATTCTGATGGCTAACGGTGAAATTAAAGACATCGCAAACGTCACGGCTAACTCTTACGTTATGTGCGCAGATGGCTCCGCTGCCCGCGTCATAAATGTCACACAGGGCTATCAGAAAATCTATAATATACAGCAAAAAACCAAACACAGAGCTTTTGAAGGTGAACCTGGTAGGTTAGATCCCAGGCGTAGAACAGTTTATCAGCGTCTTGCATTACAATGTACTGCAGGTCATAAATTGTCAGTCAGGGTCCCTACCAAACCACTGTTGGAAAAAAGTGGTAGAAATGCCACCAAATATAAAGTGAGATGGAGAAATCTGCAGCAATGTC…	APH_YDL227C_HO chromosome4:46271-48031 - 692ATGCTTTCTGAAAACACGACTATTCTGATGGCTAACGGTGAAATTAAAGACATCGCAAACGTCACGGCTAACTCTTACGTTATGTGCGCAGATGGCTCCGCTGCCCGCGTCATAAATGTCACACAGGGCTATCAGAAAATCTATAATATACAGCAAAAAACCAAACACAGAGCTTTTGAAGGTGAACCTGGTAGGTTAGATCCCAGGCGTAGAACAGTTTATCAGCGTCTTGCATTACAATGTACTGCAGGTCATAAATTGTCAGTCAGGGTCCCTACCAAACCACTGTTGGAAAAAAGTGGTAGAAATGCCACCAAATATAAAGTGAGATGGAGAAATCTGCAGCAATGTCAGA…	ALA	notfound	notfound	GLY	notfound	notfound	notfound	notfound	LEU	notfound	notfound	notfound	HIS	notfound	notfound	5	Pirassununga, Sao Paulo, Brazil	APH	Distillery
SACE_YCG	no	> SACE_YCG_YDL227C_HO chromosome4:46271-48031 - 692 ATGCTTTCTGAAAACACGACTATTCTGATGGCTAACGGTGAAATTAAAGACATCGCAAACGTCACGGCTAACTCTTACGTTATGTGCGCAGATGGCTCCGCTGCCCGCGTCATAAATGTCACACAGGGCTATCAGAAAATCTATAATATACAGCAAAAAACCAAACACAGAGCTTTTGAAGGTGAACCTGGTAGGTTAGATCCCAGGCGTAGAACAGTTTATCAGCGTCTTGCATTACAATGTACTGCAGGTCATAAATTGTCAGTCAGGGTCCCTACCAAACCACTGTTGGAAAAAAGTGGTAGAAATGCCACCAAATATAAAGTGAGATGGAGAAATCTGCAGCA…	SACE_YCG_YDL227C_HO chromosome4:46271-48031 - 692ATGCTTTCTGAAAACACGACTATTCTGATGGCTAACGGTGAAATTAAAGACATCGCAAACGTCACGGCTAACTCTTACGTTATGTGCGCAGATGGCTCCGCTGCCCGCGTCATAAATGTCACACAGGGCTATCAGAAAATCTATAATATACAGCAAAAAACCAAACACAGAGCTTTTGAAGGTGAACCTGGTAGGTTAGATCCCAGGCGTAGAACAGTTTATCAGCGTCTTGCATTACAATGTACTGCAGGTCATAAATTGTCAGTCAGGGTCCCTACCAAACCACTGTTGGAAAAAAGTGGTAGAAATGCCACCAAATATAAAGTGAGATGGAGAAATCTGCAGCAATG…	ALA	notfound	notfound	GLY	notfound	notfound	notfound	notfound	LEU	notfound	notfound	notfound	HIS	notfound	notfound	5	Maryland, USA	SACE_YCG	Industrial
BNN	no	> BNN_YDL227C_HO chromosome4:46271-48031 - 692 ATGCTTTCTGAAAACACGACTATTCTGATGGCTAACGGTGAAATTAAAGACATCGCAAACGTCACGGCTAACTCTTACGTTATGTGCGCAGATGGCTCCGCTGCCCGCGTCATAAATGTCACACAGGGCTATCAGAAAATCTATAATATACAGCAAAAAACCAAACACAGAGCTTTTGAAGGTGAACCTGGTAGGTTAGATCCCAGGCGTAGAACAGTTTATCAGCGTCTTGCATTACAATGTACTGCAGGTCATAAATTGTCAGTCAGGGTCCCTACCAAACCACTGTTGGAAAAAAGTGGTAGAAATGCCACCAAATATAAAGTGAGATGGAGAAATCTGCAGCAATGTC…	BNN_YDL227C_HO chromosome4:46271-48031 - 692ATGCTTTCTGAAAACACGACTATTCTGATGGCTAACGGTGAAATTAAAGACATCGCAAACGTCACGGCTAACTCTTACGTTATGTGCGCAGATGGCTCCGCTGCCCGCGTCATAAATGTCACACAGGGCTATCAGAAAATCTATAATATACAGCAAAAAACCAAACACAGAGCTTTTGAAGGTGAACCTGGTAGGTTAGATCCCAGGCGTAGAACAGTTTATCAGCGTCTTGCATTACAATGTACTGCAGGTCATAAATTGTCAGTCAGGGTCCCTACCAAACCACTGTTGGAAAAAAGTGGTAGAAATGCCACCAAATATAAAGTGAGATGGAGAAATCTGCAGCAATGTCAGA…	ALA	notfound	notfound	GLY	notfound	notfound	notfound	notfound	LEU	notfound	notfound	notfound	HIS	notfound	notfound	5	Pedrejon, Rioja, Spain	BNN	Wine
CNH	no	> CNH_YDL227C_HO chromosome4:46271-48031 - 692 ATGCTTTCTGAAAACACGACTATTCTGATGGCTAACGGTGAAATTAAAGACATCGCAAACGTCACGGCTAACTCTTACGTTATGTGCGCAGATGGCTCCGCTGCCCGCGTCATAAATGTCACACAGGGCTATCAGAAAATCTATAATATACAGCAAAAAACCAAACACAGAGCTTTTGAAGGTGAACCTGGTAGGTTAGATCCCAGGCGTAGAACAGTTTATCAGCGTCTTGCATTACAATGTACTGCAGGTCATAAATTGTCAGTCAGGGTCCCTACCAAACCACTGTTGGAAAAAAGTGGTAGAAATGCCACCAAATATAAAGTGAGATGGAGAAATCTGCAGCAATGTC…	CNH_YDL227C_HO chromosome4:46271-48031 - 692ATGCTTTCTGAAAACACGACTATTCTGATGGCTAACGGTGAAATTAAAGACATCGCAAACGTCACGGCTAACTCTTACGTTATGTGCGCAGATGGCTCCGCTGCCCGCGTCATAAATGTCACACAGGGCTATCAGAAAATCTATAATATACAGCAAAAAACCAAACACAGAGCTTTTGAAGGTGAACCTGGTAGGTTAGATCCCAGGCGTAGAACAGTTTATCAGCGTCTTGCATTACAATGTACTGCAGGTCATAAATTGTCAGTCAGGGTCCCTACCAAACCACTGTTGGAAAAAAGTGGTAGAAATGCCACCAAATATAAAGTGAGATGGAGAAATCTGCAGCAATGTCAGA…	ALA	notfound	notfound	GLY	notfound	notfound	notfound	notfound	LEU	notfound	notfound	notfound	notfound	LEU/HIS	notfound	6	Brazil	CNH	Bioethanol
CNM	no	> CNM_YDL227C_HO chromosome4:46271-48031 - 692 ATGCTTTCTGAAAACACGACTATTCTGATGGCTAACGGTGAAATTAAAGACATCGCAAACGTCACGGCTAACTCTTACGTTATGTGCGCAGATGGCTCCGCTGCCCGCGTCATAAATGTCACACAGGGCTATCAGAAAATCTATAATATACAGCAAAAAACCAAACACAGAGCTTTTGAAGGTGAACCTGGTAGGTTAGATCCCAGGCGTAGAACAGTTTATCAGCGTCTTGCATTACAATGTACTGCAGGTCATAAATTGTCAGTCAGGGTCCCTACCAAACCACTGTTGGAAAAAAGTGGTAGAAATGCCACCAAATATAAAGTGAGATGGAGAAATCTGCAGCAATGTC…	CNM_YDL227C_HO chromosome4:46271-48031 - 692ATGCTTTCTGAAAACACGACTATTCTGATGGCTAACGGTGAAATTAAAGACATCGCAAACGTCACGGCTAACTCTTACGTTATGTGCGCAGATGGCTCCGCTGCCCGCGTCATAAATGTCACACAGGGCTATCAGAAAATCTATAATATACAGCAAAAAACCAAACACAGAGCTTTTGAAGGTGAACCTGGTAGGTTAGATCCCAGGCGTAGAACAGTTTATCAGCGTCTTGCATTACAATGTACTGCAGGTCATAAATTGTCAGTCAGGGTCCCTACCAAACCACTGTTGGAAAAAAGTGGTAGAAATGCCACCAAATATAAAGTGAGATGGAGAAATCTGCAGCAATGTCAGA…	ALA	notfound	notfound	GLY	notfound	notfound	notfound	notfound	LEU	notfound	notfound	notfound	notfound	LEU/HIS	notfound	6	Brazil	CNM	Bioethanol
CNR	no	> CNR_YDL227C_HO chromosome4:46271-48031 - 692 ATGCTTTCTGAAAACACGACTATTCTGATGGCTAACGGTGAAATTAAAGACATCGCAAACGTCACGGCTAACTCTTACGTTATGTGCGCAGATGGCTCCGCTGCCCGCGTCATAAATGTCACACAGGGCTATCAGAAAATCTATAATATACAGCAAAAAACCAAACACAGAGCTTTTGAAGGTGAACCTGGTAGGTTAGATCCCAGGCGTAGAACAGTTTATCAGCGTCTTGCATTACAATGTACTGCAGGTCATAAATTGTCAGTCAGGGTCCCTACCAAACCACTGTTGGAAAAAAGTGGTAGAAATGCCACCAAATATAAAGTGAGATGGAGAAATCTGCAGCAATGTC…	CNR_YDL227C_HO chromosome4:46271-48031 - 692ATGCTTTCTGAAAACACGACTATTCTGATGGCTAACGGTGAAATTAAAGACATCGCAAACGTCACGGCTAACTCTTACGTTATGTGCGCAGATGGCTCCGCTGCCCGCGTCATAAATGTCACACAGGGCTATCAGAAAATCTATAATATACAGCAAAAAACCAAACACAGAGCTTTTGAAGGTGAACCTGGTAGGTTAGATCCCAGGCGTAGAACAGTTTATCAGCGTCTTGCATTACAATGTACTGCAGGTCATAAATTGTCAGTCAGGGTCCCTACCAAACCACTGTTGGAAAAAAGTGGTAGAAATGCCACCAAATATAAAGTGAGATGGAGAAATCTGCAGCAATGTCAGA…	ALA	notfound	notfound	GLY	notfound	notfound	notfound	notfound	LEU	notfound	notfound	notfound	notfound	LEU/HIS	notfound	6	Brazil	CNR	Bioethanol
CNV	no	> CNV_YDL227C_HO chromosome4:46271-48031 - 692 ATGCTTTCTGAAAACACGACTATTCTGATGGCTAACGGTGAAATTAAAGACATCGCAAACGTCACGGCTAACTCTTACGTTATGTGCGCAGATGGCTCCGCTGCCCGCGTCATAAATGTCACACAGGGCTATCAGAAAATCTATAATATACAGCAAAAAACCAAACACAGAGCTTTTGAAGGTGAACCTGGTAGGTTAGATCCCAGGCGTAGAACAGTTTATCAGCGTCTTGCATTACAATGTACTGCAGGTCATAAATTGTCAGTCAGGGTCCCTACCAAACCACTGTTGGAAAAAAGTGGTAGAAATGCCACCAAATATAAAGTGAGATGGAGAAATCTGCAGCAATGTC…	CNV_YDL227C_HO chromosome4:46271-48031 - 692ATGCTTTCTGAAAACACGACTATTCTGATGGCTAACGGTGAAATTAAAGACATCGCAAACGTCACGGCTAACTCTTACGTTATGTGCGCAGATGGCTCCGCTGCCCGCGTCATAAATGTCACACAGGGCTATCAGAAAATCTATAATATACAGCAAAAAACCAAACACAGAGCTTTTGAAGGTGAACCTGGTAGGTTAGATCCCAGGCGTAGAACAGTTTATCAGCGTCTTGCATTACAATGTACTGCAGGTCATAAATTGTCAGTCAGGGTCCCTACCAAACCACTGTTGGAAAAAAGTGGTAGAAATGCCACCAAATATAAAGTGAGATGGAGAAATCTGCAGCAATGTCAGA…	ALA	notfound	notfound	GLY	notfound	notfound	notfound	notfound	LEU	notfound	notfound	notfound	notfound	LEU/HIS	notfound	6	Brazil	CNV	Bioethanol
BTT	no	> BTT_YDL227C_HO chromosome4:46271-48031 - 692 ATGCTTTCTGAAAACACGACTATTCTGATGGCTAACGGTGAAATTAAAGACATCGCAAACGTCACGGCTAACTCTTACGTTATGTGCGCAGATGGCTCCGCTGCCCGCGTCATAAATGTCACACAGGGCTATCAGAAAATCTATAATATACAGCAAAAAACCAAACACAGAGCTTTTGAAGGTGAACCTGGTAGGTTAGATCCCAGGCGTAGAACAGTTTATCAGCGTCTTGCATTACAATGTACTGCAGGTCATAAATTGTCAGTCAGGGTCCCTACCAAACCACTGTTGGAAAAAAGTGGTAGAAATGCCACCAAATATAAAGTGAGATGGAGAAATCTGCAGCAATGTC…	BTT_YDL227C_HO chromosome4:46271-48031 - 692ATGCTTTCTGAAAACACGACTATTCTGATGGCTAACGGTGAAATTAAAGACATCGCAAACGTCACGGCTAACTCTTACGTTATGTGCGCAGATGGCTCCGCTGCCCGCGTCATAAATGTCACACAGGGCTATCAGAAAATCTATAATATACAGCAAAAAACCAAACACAGAGCTTTTGAAGGTGAACCTGGTAGGTTAGATCCCAGGCGTAGAACAGTTTATCAGCGTCTTGCATTACAATGTACTGCAGGTCATAAATTGTCAGTCAGGGTCCCTACCAAACCACTGTTGGAAAAAAGTGGTAGAAATGCCACCAAATATAAAGTGAGATGGAGAAATCTGCAGCAATGTCAGA…	ALA	notfound	notfound	GLY	notfound	notfound	notfound	notfound	LEU	notfound	notfound	notfound	notfound	LEU/HIS	notfound	6	Brazil	BTT	Distillery
ARE	no	> ARE_YDL227C_HO chromosome4:46271-48031 - 692 ATGCTTTCTGAAAACACGACTATTCTGATGGCTAACGGTGAAATTAAAGACATCGCAAACGTCACGGCTAACTCTTACGTTATGTGCGCAGATGGCTCCGCTGCCCGCGTCATAAATGTCACACAGGGCTATCAGAAAATCTATAATATACAGCAAAAAACCAAACACAGAGCTTTTGAAGGTGAACCTGGTAGGTTAGATCCCAGGCGTAGAACAGTTTATCAGCGTCTTGCATTACAATGTACTGCAGGTCATAAATTGTCAGTCAGGGTCCCTACCAAACCACTGTTGGAAAAAAGTGGTAGAAATGCCACCAAATATAAAGTGAGATGGAGAAATCTGCAGCAATGTC…	ARE_YDL227C_HO chromosome4:46271-48031 - 692ATGCTTTCTGAAAACACGACTATTCTGATGGCTAACGGTGAAATTAAAGACATCGCAAACGTCACGGCTAACTCTTACGTTATGTGCGCAGATGGCTCCGCTGCCCGCGTCATAAATGTCACACAGGGCTATCAGAAAATCTATAATATACAGCAAAAAACCAAACACAGAGCTTTTGAAGGTGAACCTGGTAGGTTAGATCCCAGGCGTAGAACAGTTTATCAGCGTCTTGCATTACAATGTACTGCAGGTCATAAATTGTCAGTCAGGGTCCCTACCAAACCACTGTTGGAAAAAAGTGGTAGAAATGCCACCAAATATAAAGTGAGATGGAGAAATCTGCAGCAATGTCAGA…	ALA	notfound	notfound	GLY	notfound	notfound	notfound	notfound	LEU	notfound	notfound	notfound	notfound	LEU/HIS	notfound	6	NA	ARE	Tree
ADL	no	> ADL_YDL227C_HO chromosome4:46271-48031 - 692 ATGCTTTCTGAAAACACGACTATTCTGATGGCTAACGGTGAAATTAAAGACATCGCAAACGTCACGGCTAACTCTTACGTTATGTGCGCAGATGGCTCCGCTGCCCGCGTCATAAATGTCACACAGGGCTATCAGAAAATCTATAATATACAGCAAAAAACCAAACACAGAGCTTTTGAAGGTGAACCTGGTAGGTTAGATCCCAGGCGTAGAACAGTTTATCAGCGTCTTGCATTACAATGTACTGCAGGTCATAAATTGTCAGTCAGGGTCCCTACCAAACCACTGTTGGAAAAAAGTGGTAGAAATGCCACCAAATATAAAGTGAGATGGAGAAATCTGCAGCAATGTC…	ADL_YDL227C_HO chromosome4:46271-48031 - 692ATGCTTTCTGAAAACACGACTATTCTGATGGCTAACGGTGAAATTAAAGACATCGCAAACGTCACGGCTAACTCTTACGTTATGTGCGCAGATGGCTCCGCTGCCCGCGTCATAAATGTCACACAGGGCTATCAGAAAATCTATAATATACAGCAAAAAACCAAACACAGAGCTTTTGAAGGTGAACCTGGTAGGTTAGATCCCAGGCGTAGAACAGTTTATCAGCGTCTTGCATTACAATGTACTGCAGGTCATAAATTGTCAGTCAGGGTCCCTACCAAACCACTGTTGGAAAAAAGTGGTAGAAATGCCACCAAATATAAAGTGAGATGGAGAAATCTGCAGCAATGTCAGA…	ALA	notfound	notfound	notfound	ASP	notfound	notfound	notfound	LEU	notfound	notfound	LEU	notfound	notfound	notfound	7	Netherlands	ADL	Bakery
AGE	no	> AGE_YDL227C_HO chromosome4:46271-48031 - 692 ATGCTTTCTGAAAACACGACTATTCTGATGGCTAACGGTGAAATTAAAGACATCGCAAACGTCACGGCTAACTCTTACGTTATGTGCGCAGATGGCTCCGCTGCCCGCGTCATAAATGTCACACAGGGCTATCAGAAAATCTATAATATACAGCAAAAAACCAAACACAGAGCTTTTGAAGGTGAACCTGGTAGGTTAGATCCCAGGCGTAGAACAGTTTATCAGCGTCTTGCATTACAATGTACTGCAGGTCATAAATTGTCAGTCAGGGTCCCTACCAAACCACTGTTGGAAAAAAGTGGTAGAAATGCCACCAAATATAAAGTGAGATGGAGAAATCTGCAGCAATGTC…	AGE_YDL227C_HO chromosome4:46271-48031 - 692ATGCTTTCTGAAAACACGACTATTCTGATGGCTAACGGTGAAATTAAAGACATCGCAAACGTCACGGCTAACTCTTACGTTATGTGCGCAGATGGCTCCGCTGCCCGCGTCATAAATGTCACACAGGGCTATCAGAAAATCTATAATATACAGCAAAAAACCAAACACAGAGCTTTTGAAGGTGAACCTGGTAGGTTAGATCCCAGGCGTAGAACAGTTTATCAGCGTCTTGCATTACAATGTACTGCAGGTCATAAATTGTCAGTCAGGGTCCCTACCAAACCACTGTTGGAAAAAAGTGGTAGAAATGCCACCAAATATAAAGTGAGATGGAGAAATCTGCAGCAATGTCAGA…	ALA	notfound	notfound	notfound	ASP	notfound	notfound	notfound	LEU	notfound	notfound	LEU	notfound	notfound	notfound	7	NA	AGE	Bakery
BTD	no	> BTD_YDL227C_HO chromosome4:46271-48031 - 692 ATGCTTTCTGAAAACACGACTATTCTGATGGCTAACGGTGAAATTAAAGACATCGCAAACGTCACGGCTAACTCTTACGTTATGTGCGCAGATGGCTCCGCTGCCCGCGTCATAAATGTCACACAGGGCTATCAGAAAATCTATAATATACAGCAAAAAACCAAACACAGAGCTTTTGAAGGTGAACCTGGTAGGTTAGATCCCAGGCGTAGAACAGTTTATCAGCGTCTTGCATTACAATGTACTGCAGGTCATAAATTGTCAGTCAGGGTCCCTACCAAACCACTGTTGGAAAAAAGTGGTAGAAATGCCACCAAATATAAAGTGAGATGGAGAAATCTGCAGCAATGTC…	BTD_YDL227C_HO chromosome4:46271-48031 - 692ATGCTTTCTGAAAACACGACTATTCTGATGGCTAACGGTGAAATTAAAGACATCGCAAACGTCACGGCTAACTCTTACGTTATGTGCGCAGATGGCTCCGCTGCCCGCGTCATAAATGTCACACAGGGCTATCAGAAAATCTATAATATACAGCAAAAAACCAAACACAGAGCTTTTGAAGGTGAACCTGGTAGGTTAGATCCCAGGCGTAGAACAGTTTATCAGCGTCTTGCATTACAATGTACTGCAGGTCATAAATTGTCAGTCAGGGTCCCTACCAAACCACTGTTGGAAAAAAGTGGTAGAAATGCCACCAAATATAAAGTGAGATGGAGAAATCTGCAGCAATGTCAGA…	ALA	notfound	notfound	notfound	ASP	notfound	notfound	notfound	LEU	notfound	notfound	LEU	notfound	notfound	notfound	7	NA	BTD	Bakery
CHG	no	> CHG_YDL227C_HO chromosome4:46271-48031 - 692 ATGCTTTCTGAAAACACGACTATTCTGATGGCTAACGGTGAAATTAAAGACATCGCAAACGTCACGGCTAACTCTTACGTTATGTGCGCAGATGGCTCCGCTGCCCGCGTCATAAATGTCACACAGGGCTATCAGAAAATCTATAATATACAGCAAAAAACCAAACACAGAGCTTTTGAAGGTGAACCTGGTAGGTTAGATCCCAGGCGTAGAACAGTTTATCAGCGTCTTGCATTACAATGTACTGCAGGTCATAAATTGTCAGTCAGGGTCCCTACCAAACCACTGTTGGAAAAAAGTGGTAGAAATGCCACCAAATATAAAGTGAGATGGAGAAATCTGCAGCAATGTC…	CHG_YDL227C_HO chromosome4:46271-48031 - 692ATGCTTTCTGAAAACACGACTATTCTGATGGCTAACGGTGAAATTAAAGACATCGCAAACGTCACGGCTAACTCTTACGTTATGTGCGCAGATGGCTCCGCTGCCCGCGTCATAAATGTCACACAGGGCTATCAGAAAATCTATAATATACAGCAAAAAACCAAACACAGAGCTTTTGAAGGTGAACCTGGTAGGTTAGATCCCAGGCGTAGAACAGTTTATCAGCGTCTTGCATTACAATGTACTGCAGGTCATAAATTGTCAGTCAGGGTCCCTACCAAACCACTGTTGGAAAAAAGTGGTAGAAATGCCACCAAATATAAAGTGAGATGGAGAAATCTGCAGCAATGTCAGA…	ALA	notfound	notfound	notfound	ASP	notfound	notfound	notfound	LEU	notfound	notfound	LEU	notfound	notfound	notfound	7	Vietnam	CHG	Bakery
CHH	no	> CHH_YDL227C_HO chromosome4:46271-48031 - 692 ATGCTTTCTGAAAACACGACTATTCTGATGGCTAACGGTGAAATTAAAGACATCGCAAACGTCACGGCTAACTCTTACGTTATGTGCGCAGATGGCTCCGCTGCCCGCGTCATAAATGTCACACAGGGCTATCAGAAAATCTATAATATACAGCAAAAAACCAAACACAGAGCTTTTGAAGGTGAACCTGGTAGGTTAGATCCCAGGCGTAGAACAGTTTATCAGCGTCTTGCATTACAATGTACTGCAGGTCATAAATTGTCAGTCAGGGTCCCTACCAAACCACTGTTGGAAAAAAGTGGTAGAAATGCCACCAAATATAAAGTGAGATGGAGAAATCTGCAGCAATGTC…	CHH_YDL227C_HO chromosome4:46271-48031 - 692ATGCTTTCTGAAAACACGACTATTCTGATGGCTAACGGTGAAATTAAAGACATCGCAAACGTCACGGCTAACTCTTACGTTATGTGCGCAGATGGCTCCGCTGCCCGCGTCATAAATGTCACACAGGGCTATCAGAAAATCTATAATATACAGCAAAAAACCAAACACAGAGCTTTTGAAGGTGAACCTGGTAGGTTAGATCCCAGGCGTAGAACAGTTTATCAGCGTCTTGCATTACAATGTACTGCAGGTCATAAATTGTCAGTCAGGGTCCCTACCAAACCACTGTTGGAAAAAAGTGGTAGAAATGCCACCAAATATAAAGTGAGATGGAGAAATCTGCAGCAATGTCAGA…	ALA	notfound	notfound	notfound	ASP	notfound	notfound	notfound	LEU	notfound	notfound	LEU	notfound	notfound	notfound	7	France	CHH	Bakery
CHL	no	> CHL_YDL227C_HO chromosome4:46271-48031 - 692 ATGCTTTCTGAAAACACGACTATTCTGATGGCTAACGGTGAAATTAAAGACATCGCAAACGTCACGGCTAACTCTTACGTTATGTGCGCAGATGGCTCCGCTGCCCGCGTCATAAATGTCACACAGGGCTATCAGAAAATCTATAATATACAGCAAAAAACCAAACACAGAGCTTTTGAAGGTGAACCTGGTAGGTTAGATCCCAGGCGTAGAACAGTTTATCAGCGTCTTGCATTACAATGTACTGCAGGTCATAAATTGTCAGTCAGGGTCCCTACCAAACCACTGTTGGAAAAAAGTGGTAGAAATGCCACCAAATATAAAGTGAGATGGAGAAATCTGCAGCAATGTC…	CHL_YDL227C_HO chromosome4:46271-48031 - 692ATGCTTTCTGAAAACACGACTATTCTGATGGCTAACGGTGAAATTAAAGACATCGCAAACGTCACGGCTAACTCTTACGTTATGTGCGCAGATGGCTCCGCTGCCCGCGTCATAAATGTCACACAGGGCTATCAGAAAATCTATAATATACAGCAAAAAACCAAACACAGAGCTTTTGAAGGTGAACCTGGTAGGTTAGATCCCAGGCGTAGAACAGTTTATCAGCGTCTTGCATTACAATGTACTGCAGGTCATAAATTGTCAGTCAGGGTCCCTACCAAACCACTGTTGGAAAAAAGTGGTAGAAATGCCACCAAATATAAAGTGAGATGGAGAAATCTGCAGCAATGTCAGA…	ALA	notfound	notfound	notfound	ASP	notfound	notfound	notfound	LEU	notfound	notfound	LEU	notfound	notfound	notfound	7	Northern Europe	CHL	Bakery
AEC	no	> AEC_YDL227C_HO chromosome4:46271-48031 - 692 ATGCTTTCTGAAAACACGACTATTCTGATGGCTAACGGTGAAATTAAAGACATCGCAAACGTCACGGCTAACTCTTACGTTATGTGCGCAGATGGCTCCGCTGCCCGCGTCATAAATGTCACACAGGGCTATCAGAAAATCTATAATATACAGCAAAAAACCAAACACAGAGCTTTTGAAGGTGAACCTGGTAGGTTAGATCCCAGGCGTAGAACAGTTTATCAGCGTCTTGCATTACAATGTACTGCAGSTCATAAATTGTCAGTCAGGGTCCCTACCAAACCACTGTTAGAAAAAAGTGGTAGAAATGCCACCAAATATAAAGTGAGATGGAGAAATCTGCAGCAATGTC…	AEC_YDL227C_HO chromosome4:46271-48031 - 692ATGCTTTCTGAAAACACGACTATTCTGATGGCTAACGGTGAAATTAAAGACATCGCAAACGTCACGGCTAACTCTTACGTTATGTGCGCAGATGGCTCCGCTGCCCGCGTCATAAATGTCACACAGGGCTATCAGAAAATCTATAATATACAGCAAAAAACCAAACACAGAGCTTTTGAAGGTGAACCTGGTAGGTTAGATCCCAGGCGTAGAACAGTTTATCAGCGTCTTGCATTACAATGTACTGCAGSTCATAAATTGTCAGTCAGGGTCCCTACCAAACCACTGTTAGAAAAAAGTGGTAGAAATGCCACCAAATATAAAGTGAGATGGAGAAATCTGCAGCAATGTCAGA…	ALA	notfound	notfound	notfound	ASP	notfound	notfound	notfound	LEU	notfound	notfound	LEU	notfound	notfound	notfound	7	NA	AEC	Beer
BDL	no	> BDL_YDL227C_HO chromosome4:46271-48031 - 692 ATGCTTTCTGAAAACACGACTATTCTGATGGCTAACGGTGAAATTAAAGACATCGCAAACGTCACGGCTAACTCTTACGTTATGTGCGCAGATGGCTCCGCTGCCCGCGTCATAAATGTCACACAGGGCTATCAGAAAATCTATAATATACAGCAAAAAACCAAACACAGAGCTTTTGAAGGTGAACCTGGTAGGTTAGATCCCAGGCGTAGAACAGTTTATCAGCGTCTTGCATTACAATGTACTGCAGGTCATAAATTGTCAGTCAGGGTCCCTACCAAACCACTGTTGGAAAAAAGTGGTAGAAATGCCACCAAATATAAAGTGAGATGGAGAAATCTGCAGCAATGTC…	BDL_YDL227C_HO chromosome4:46271-48031 - 692ATGCTTTCTGAAAACACGACTATTCTGATGGCTAACGGTGAAATTAAAGACATCGCAAACGTCACGGCTAACTCTTACGTTATGTGCGCAGATGGCTCCGCTGCCCGCGTCATAAATGTCACACAGGGCTATCAGAAAATCTATAATATACAGCAAAAAACCAAACACAGAGCTTTTGAAGGTGAACCTGGTAGGTTAGATCCCAGGCGTAGAACAGTTTATCAGCGTCTTGCATTACAATGTACTGCAGGTCATAAATTGTCAGTCAGGGTCCCTACCAAACCACTGTTGGAAAAAAGTGGTAGAAATGCCACCAAATATAAAGTGAGATGGAGAAATCTGCAGCAATGTCAGA…	ALA	notfound	notfound	notfound	ASP	notfound	notfound	notfound	LEU	notfound	notfound	LEU	notfound	notfound	notfound	7	Equador	BDL	Beer
CFC	no	> CFC_YDL227C_HO chromosome4:46271-48031 - 692 ATGCTTTCTGAAAACACGACTATTCTGATGGCTAACGGTGAAATTAAAGACATCGCAAACGTCACGGCTAACTCTTACGTTATGTGCGCAGATGGCTCCGCTGCCCGCGTCATAAATGTCACACAGGGCTATCAGAAAATCTATAATATACAGCAAAAAACCAAACACAGAGCTTTTGAAGGTGAACCTGGTAGGTTAGATCCCAGGCGTAGAACAGTTTATCAGCGTCTTGCATTACAATGTACTGCAGGTCATAAATTGTCAGTCAGGGTCCCTACCAAACCACTGTTRGAAAAAAGTGGTAGAAATGCCACCAAATATAAAGTGAGATGGAGAAATCTGCAGCAATGTC…	CFC_YDL227C_HO chromosome4:46271-48031 - 692ATGCTTTCTGAAAACACGACTATTCTGATGGCTAACGGTGAAATTAAAGACATCGCAAACGTCACGGCTAACTCTTACGTTATGTGCGCAGATGGCTCCGCTGCCCGCGTCATAAATGTCACACAGGGCTATCAGAAAATCTATAATATACAGCAAAAAACCAAACACAGAGCTTTTGAAGGTGAACCTGGTAGGTTAGATCCCAGGCGTAGAACAGTTTATCAGCGTCTTGCATTACAATGTACTGCAGGTCATAAATTGTCAGTCAGGGTCCCTACCAAACCACTGTTRGAAAAAAGTGGTAGAAATGCCACCAAATATAAAGTGAGATGGAGAAATCTGCAGCAATGTCAGA…	ALA	notfound	notfound	notfound	ASP	notfound	notfound	notfound	LEU	notfound	notfound	LEU	notfound	notfound	notfound	7	Westmalle, Belgium	CFC	Beer
CFI	no	> CFI_YDL227C_HO chromosome4:46271-48031 - 692 ATGCTTTCTGAAAACACGACTATTCTGATGGCTAACGGTGAAATTAAAGACATCGCAAACGTCACGGCTAACTCTTACGTTATGTGCGCAGATGGCTCCGCTGCCCGCGTCATAAATGTCACACAGGGCTATCAGAAAATCTATAATATACAGCAAAAAACCAAACACAGAGCTTTTGAAGGTGAACCTGGTAGGTTAGATCCCAGGCGTAGAACAGTTTATCAGCGTCTTGCATTACAATGTACTGCAGGTCATAAATTGTCAGTCAGGGTCCCTACCAAACCACTGTTGGAAAAAAGTGGTAGAAATGCCACCAAATATAAAGTGAGATGGAGAAATCTGCAGCAATGTC…	CFI_YDL227C_HO chromosome4:46271-48031 - 692ATGCTTTCTGAAAACACGACTATTCTGATGGCTAACGGTGAAATTAAAGACATCGCAAACGTCACGGCTAACTCTTACGTTATGTGCGCAGATGGCTCCGCTGCCCGCGTCATAAATGTCACACAGGGCTATCAGAAAATCTATAATATACAGCAAAAAACCAAACACAGAGCTTTTGAAGGTGAACCTGGTAGGTTAGATCCCAGGCGTAGAACAGTTTATCAGCGTCTTGCATTACAATGTACTGCAGGTCATAAATTGTCAGTCAGGGTCCCTACCAAACCACTGTTGGAAAAAAGTGGTAGAAATGCCACCAAATATAAAGTGAGATGGAGAAATCTGCAGCAATGTCAGA…	ALA	notfound	notfound	notfound	ASP	notfound	notfound	notfound	LEU	notfound	notfound	LEU	notfound	notfound	notfound	7	UK	CFI	Beer
CFN	no	> CFN_YDL227C_HO chromosome4:46271-48031 - 692 ATGCTTTCTGAAAACACGACTATTCTGATGGCTAACGGTGAAATTAAAGACATCGCAAACGTCACGGCTAACTCTTACGTTATGTGCGCAGATGGCTCCGCTGCCCGCGTCATAAATGTCACACAGGGCTATCAGAAAATCTATAATATACAGCAAAAAACCAAACACAGAGCTTTTGAAGGTGAACCTGGTAGGTTAGATCCCAGGCGTAGAACAGTTTATCAGCGTCTTGCATTACAATGTACTGCAGGTCATAAATTGTCAGTCAGGGTCCCTACCAAACCACTGTTGGAAAAAAGTGGTAGAAATGCCACCAAATATAAAGTGAGATGGAGAAATCTGCAGCAATGTC…	CFN_YDL227C_HO chromosome4:46271-48031 - 692ATGCTTTCTGAAAACACGACTATTCTGATGGCTAACGGTGAAATTAAAGACATCGCAAACGTCACGGCTAACTCTTACGTTATGTGCGCAGATGGCTCCGCTGCCCGCGTCATAAATGTCACACAGGGCTATCAGAAAATCTATAATATACAGCAAAAAACCAAACACAGAGCTTTTGAAGGTGAACCTGGTAGGTTAGATCCCAGGCGTAGAACAGTTTATCAGCGTCTTGCATTACAATGTACTGCAGGTCATAAATTGTCAGTCAGGGTCCCTACCAAACCACTGTTGGAAAAAAGTGGTAGAAATGCCACCAAATATAAAGTGAGATGGAGAAATCTGCAGCAATGTCAGA…	ALA	notfound	notfound	notfound	ASP	notfound	notfound	notfound	LEU	notfound	notfound	LEU	notfound	notfound	notfound	7	NA	CFN	Beer
CHK	no	> CHK_YDL227C_HO chromosome4:46271-48031 - 692 ATGCTTTCTGAAAACACGACTATTCTGATGGCTAACGGTGAAATTAAAGACATCGCAAACGTCACGGCTAACTCTTACGTTATGTGCGCAGATGGCTCCGCTGCCCGCGTCATAAATGTCACACAGGGCTATCAGAAAATCTATAATATACAGCAAAAAACCAAACACAGAGCTTTTGAAGGTGAACCTGGTAGGTTAGATCCCAGGCGTAGAACAGTTTATCAGCGTCTTGCATTACAATGTACTGCAGGTCATAAATTGTCAGTCAGGGTCCCTACCAAACCACTGTTGGAAAAAAGTGGTAGAAATGCCACCAAATATAAAGTGAGATGGAGAAATCTGCAGCAATGTC…	CHK_YDL227C_HO chromosome4:46271-48031 - 692ATGCTTTCTGAAAACACGACTATTCTGATGGCTAACGGTGAAATTAAAGACATCGCAAACGTCACGGCTAACTCTTACGTTATGTGCGCAGATGGCTCCGCTGCCCGCGTCATAAATGTCACACAGGGCTATCAGAAAATCTATAATATACAGCAAAAAACCAAACACAGAGCTTTTGAAGGTGAACCTGGTAGGTTAGATCCCAGGCGTAGAACAGTTTATCAGCGTCTTGCATTACAATGTACTGCAGGTCATAAATTGTCAGTCAGGGTCCCTACCAAACCACTGTTGGAAAAAAGTGGTAGAAATGCCACCAAATATAAAGTGAGATGGAGAAATCTGCAGCAATGTCAGA…	ALA	notfound	notfound	notfound	ASP	notfound	notfound	notfound	LEU	notfound	notfound	LEU	notfound	notfound	notfound	7	UK	CHK	Beer
AEL	no	> AEL_YDL227C_HO chromosome4:46271-48031 - 692 ATGCTTTCTGAAAACACGACTATTCTGATGGCTAACGGTGAAATTAAAGACATCGCAAACGTCACGGCTAACTCTTACGTTATGTGCGCAGATGGCTCCGCTGCCCGCGTCATAAATGTCACACAGGGCTATCAGAAAATCTATAATATACAGCAAAAAACCAAACACAGAGCTTTTGAAGGTGAACCTGGTAGGTTAGATCCCAGGCGTAGAACAGTTTATCAGCGTCTTGCATTACAATGTACTGCAGGTCATAAATTGTCAGTCAGGGTCCCTACCAAACCACTGTTGGAAAAAAGTGGTAGAAATGCCACCAAATATAAAGTGAGATGGAGAAATCTGCAGCAATGTC…	AEL_YDL227C_HO chromosome4:46271-48031 - 692ATGCTTTCTGAAAACACGACTATTCTGATGGCTAACGGTGAAATTAAAGACATCGCAAACGTCACGGCTAACTCTTACGTTATGTGCGCAGATGGCTCCGCTGCCCGCGTCATAAATGTCACACAGGGCTATCAGAAAATCTATAATATACAGCAAAAAACCAAACACAGAGCTTTTGAAGGTGAACCTGGTAGGTTAGATCCCAGGCGTAGAACAGTTTATCAGCGTCTTGCATTACAATGTACTGCAGGTCATAAATTGTCAGTCAGGGTCCCTACCAAACCACTGTTGGAAAAAAGTGGTAGAAATGCCACCAAATATAAAGTGAGATGGAGAAATCTGCAGCAATGTCAGA…	ALA	notfound	notfound	notfound	ASP	notfound	notfound	notfound	LEU	notfound	notfound	LEU	notfound	notfound	notfound	7	NA	AEL	Distillery
ATS	no	> ATS_YDL227C_HO chromosome4:46271-48031 - 692 ATGCTTTCTGAAAACACGACTATTCTGATGGCTAACGGTGAAATTAAAGACATCGCAAACGTCACGGCTAACTCTTACGTTATGTGCGCAGATGGCTCCGCTGCCCGCGTCATAAATGTCACACAGGGCTATCAGAAAATCTATAATATACAGCAAAAAACCAAACACAGAGCTTTTGAAGGTGAACCTGGTAGGTTAGATCCCAGGCGTAGAACAGTTTATCAGCGTCTTGCATTACAATGTACTGCAGGTCATAAATTGTCAGTCAGGGTCCCTACCAAACCACTGTTGGAAAAAAGTGGTAGAAATGCCACCAAATATAAAGTGAGATGGAGAAATCTGCAGCAATGTC…	ATS_YDL227C_HO chromosome4:46271-48031 - 692ATGCTTTCTGAAAACACGACTATTCTGATGGCTAACGGTGAAATTAAAGACATCGCAAACGTCACGGCTAACTCTTACGTTATGTGCGCAGATGGCTCCGCTGCCCGCGTCATAAATGTCACACAGGGCTATCAGAAAATCTATAATATACAGCAAAAAACCAAACACAGAGCTTTTGAAGGTGAACCTGGTAGGTTAGATCCCAGGCGTAGAACAGTTTATCAGCGTCTTGCATTACAATGTACTGCAGGTCATAAATTGTCAGTCAGGGTCCCTACCAAACCACTGTTGGAAAAAAGTGGTAGAAATGCCACCAAATATAAAGTGAGATGGAGAAATCTGCAGCAATGTCAGA…	ALA	notfound	notfound	notfound	ASP	notfound	notfound	notfound	LEU	notfound	notfound	LEU	notfound	notfound	notfound	7	Spain	ATS	Flower
BBP	no	> BBP_YDL227C_HO chromosome4:46271-48031 - 692 ATGCTTTCTGAAAACACGACTATTCTGATGGCTAACGGTGAAATTAAAGACATCGCAAACGTCACGGCTAACTCTTACGTTATGTGCGCAGATGGCTCCGCTGCCCGCGTCATAAATGTCACACAGGGCTATCAGAAAATCTATAATATACAGCAAAAAACCAAACACAGAGCTTTTGAAGGTGAACCTGGTAGGTTAGATCCCAGGCGTAGAACAGTTTATCAGCGTCTTGCATTACAATGTACTGCAGGTCATAAATTGTCAGTCAGGGTCCCTACCAAACCACTGTTGGAAAAAAGTGGTAGAAATGCCACCAAATATAAAGTGAGATGGAGAAATCTGCAGCAATGTC…	BBP_YDL227C_HO chromosome4:46271-48031 - 692ATGCTTTCTGAAAACACGACTATTCTGATGGCTAACGGTGAAATTAAAGACATCGCAAACGTCACGGCTAACTCTTACGTTATGTGCGCAGATGGCTCCGCTGCCCGCGTCATAAATGTCACACAGGGCTATCAGAAAATCTATAATATACAGCAAAAAACCAAACACAGAGCTTTTGAAGGTGAACCTGGTAGGTTAGATCCCAGGCGTAGAACAGTTTATCAGCGTCTTGCATTACAATGTACTGCAGGTCATAAATTGTCAGTCAGGGTCCCTACCAAACCACTGTTGGAAAAAAGTGGTAGAAATGCCACCAAATATAAAGTGAGATGGAGAAATCTGCAGCAATGTCAGA…	ALA	notfound	notfound	notfound	ASP	notfound	notfound	notfound	LEU	notfound	notfound	LEU	notfound	notfound	notfound	7	Spain	BBP	Flower
CDR	no	> CDR_YDL227C_HO chromosome4:46271-48031 - 692 ATGCTTTCTGAAAACACGACTATTCTGATGGCTAACGGTGAAATTAAAGACATCGCAAACGTCACGGCTAACTCTTACGTTATGTGCGCAGATGGCTCCGCTGCCCGCGTCATAAATGTCACACAGGGCTATCAGAAAATCTATAATATACAGCAAAAAACCAAACACAGAGCTTTTGAAGGTGAACCTGGTAGGTTAGATCCCAGGCGTAGAACAGTTTATCAGCGTCTTGCATTACAATGTACTGCAGGTCATAAATTGTCAGTCAGGGTCCCTACCAAACCACTGTTGGAAAAAAGTGGTAGAAATGCCACCAAATATAAAGTGAGATGGAGAAATCTGCAGCAATGTC…	CDR_YDL227C_HO chromosome4:46271-48031 - 692ATGCTTTCTGAAAACACGACTATTCTGATGGCTAACGGTGAAATTAAAGACATCGCAAACGTCACGGCTAACTCTTACGTTATGTGCGCAGATGGCTCCGCTGCCCGCGTCATAAATGTCACACAGGGCTATCAGAAAATCTATAATATACAGCAAAAAACCAAACACAGAGCTTTTGAAGGTGAACCTGGTAGGTTAGATCCCAGGCGTAGAACAGTTTATCAGCGTCTTGCATTACAATGTACTGCAGGTCATAAATTGTCAGTCAGGGTCCCTACCAAACCACTGTTGGAAAAAAGTGGTAGAAATGCCACCAAATATAAAGTGAGATGGAGAAATCTGCAGCAATGTCAGA…	ALA	notfound	notfound	notfound	ASP	notfound	notfound	notfound	LEU	notfound	notfound	LEU	notfound	notfound	notfound	7	Spain	CDR	Flower
AFT	no	> AFT_YDL227C_HO chromosome4:46271-48031 - 692 ATGCTTTCTGAAAACACGACTATTCTGATGGCTAACGGTGAAATTAAAGACATCGCAAACGTCACGGCTAACTCTTACGTTATGTGCGCAGATGGCTCCGCTGCCCGCGTCATAAATGTCACACAGGGCTATCAGAAAATCTATAATATACAGCAAAAAACCAAACACAGAGCTTTTGAAGGTGAACCTGGTAGGTTAGATCCCAGGCGTAGAACAGTTTATCAGCGTCTTGCATTACAATGTACTGCAGGTCATAAATTGTCAGTCAGGGTCCCTACCAAACCACTGTTGGAAAAAAGTGGTAGAAATGCCACCAAATATAAAGTGAGATGGAGAAATCTGCAGCAATGTC…	AFT_YDL227C_HO chromosome4:46271-48031 - 692ATGCTTTCTGAAAACACGACTATTCTGATGGCTAACGGTGAAATTAAAGACATCGCAAACGTCACGGCTAACTCTTACGTTATGTGCGCAGATGGCTCCGCTGCCCGCGTCATAAATGTCACACAGGGCTATCAGAAAATCTATAATATACAGCAAAAAACCAAACACAGAGCTTTTGAAGGTGAACCTGGTAGGTTAGATCCCAGGCGTAGAACAGTTTATCAGCGTCTTGCATTACAATGTACTGCAGGTCATAAATTGTCAGTCAGGGTCCCTACCAAACCACTGTTGGAAAAAAGTGGTAGAAATGCCACCAAATATAAAGTGAGATGGAGAAATCTGCAGCAATGTCAGA…	ALA	notfound	notfound	notfound	ASP	notfound	notfound	notfound	LEU	notfound	notfound	LEU	notfound	notfound	notfound	7	Austria	AFT	Human, clinical
BFE	no	> BFE_YDL227C_HO chromosome4:46271-48031 - 692 ATGCTTTCTGAAAACACGACTATTCTGATGGCTAACGGTGAAATTAAAGACATCGCAAACGTCACGGCTAACTCTTACGTTATGTGCGCAGATGGCTCCGCTGCCCGCGTCATAAATGTCACACAGGGCTATCAGAAAATCTATAATATACAGCAAAAAACCAAACACAGAGCTTTTGAAGGTGAACCTGGTAGGTTAGATCCCAGGCGTAGAACAGTTTATCAGCGTCTTGCATTACAATGTACTGCAGGTCATAAATTGTCAGTCAGGGTCCCTACCAAACCACTGTTGGAAAAAAGTGGTAGAAATGCCACCAAATATAAAGTGAGATGGAGAAATCTGCAGCAATGTC…	BFE_YDL227C_HO chromosome4:46271-48031 - 692ATGCTTTCTGAAAACACGACTATTCTGATGGCTAACGGTGAAATTAAAGACATCGCAAACGTCACGGCTAACTCTTACGTTATGTGCGCAGATGGCTCCGCTGCCCGCGTCATAAATGTCACACAGGGCTATCAGAAAATCTATAATATACAGCAAAAAACCAAACACAGAGCTTTTGAAGGTGAACCTGGTAGGTTAGATCCCAGGCGTAGAACAGTTTATCAGCGTCTTGCATTACAATGTACTGCAGGTCATAAATTGTCAGTCAGGGTCCCTACCAAACCACTGTTGGAAAAAAGTGGTAGAAATGCCACCAAATATAAAGTGAGATGGAGAAATCTGCAGCAATGTCAGA…	ALA	notfound	notfound	notfound	ASP	notfound	notfound	notfound	LEU	notfound	notfound	LEU	notfound	notfound	notfound	7	NA	BFE	Industrial
BFM	no	> BFM_YDL227C_HO chromosome4:46271-48031 - 692 ATGCTTTCTGAAAACACGACTATTCTGATGGCTAACGGTGAAATTAAAGACATCGCAAACGTCACGGCTAACTCTTACGTTATGTGCGCAGATGGCTCCGCTGCCCGCGTCATAAATGTCACACAGGGCTATCAGAAAATCTATAATATACAGCAAAAAACCAAACACAGAGCTTTTGAAGGTGAACCTGGTAGGTTAGATCCCAGGCGTAGAACAGTTTATCAGCGTCTTGCATTACAATGTACTGCAGGTCATAAATTGTCAGTCAGGGTCCCTACCAAACCACTGTTGGAAAAAAGTGGTAGAAATGCCACCAAATATAAAGTGAGATGGAGAAATCTGCAGCAATGTC…	BFM_YDL227C_HO chromosome4:46271-48031 - 692ATGCTTTCTGAAAACACGACTATTCTGATGGCTAACGGTGAAATTAAAGACATCGCAAACGTCACGGCTAACTCTTACGTTATGTGCGCAGATGGCTCCGCTGCCCGCGTCATAAATGTCACACAGGGCTATCAGAAAATCTATAATATACAGCAAAAAACCAAACACAGAGCTTTTGAAGGTGAACCTGGTAGGTTAGATCCCAGGCGTAGAACAGTTTATCAGCGTCTTGCATTACAATGTACTGCAGGTCATAAATTGTCAGTCAGGGTCCCTACCAAACCACTGTTGGAAAAAAGTGGTAGAAATGCCACCAAATATAAAGTGAGATGGAGAAATCTGCAGCAATGTCAGA…	ALA	notfound	notfound	notfound	ASP	notfound	notfound	notfound	LEU	notfound	notfound	LEU	notfound	notfound	notfound	7	Slovenia	BFM	Industrial
ANP	no	> ANP_YDL227C_HO chromosome4:46271-48031 - 692 ATGCTTTCTGAAAACACGACTATTCTGATGGCTAACGGTGAAATTAAAGACATCGCAAACGTCACGGCTAACTCTTACGTTATGTGCGCAGATGGCTCCGCTGCCCGCGTCATAAATGTCACACAGGGCTATCAGAAAATCTATAATATACAGCAAAAAACCAAACACAGAGCTTTTGAAGGTGAACCTGGTAGGTTAGATCCCAGGCGTAGAACAGTTTATCAGCGTCTTGCATTACAATGTACTGCAGGTCATAAATTGTCAGTCAGGGTCCCTACCAAACCACTGTTGGAAAAAAGTGGTAGAAATGCCACCAAATATAAAGTGAGATGGAGAAATCTGCAGCAATGTC…	ANP_YDL227C_HO chromosome4:46271-48031 - 692ATGCTTTCTGAAAACACGACTATTCTGATGGCTAACGGTGAAATTAAAGACATCGCAAACGTCACGGCTAACTCTTACGTTATGTGCGCAGATGGCTCCGCTGCCCGCGTCATAAATGTCACACAGGGCTATCAGAAAATCTATAATATACAGCAAAAAACCAAACACAGAGCTTTTGAAGGTGAACCTGGTAGGTTAGATCCCAGGCGTAGAACAGTTTATCAGCGTCTTGCATTACAATGTACTGCAGGTCATAAATTGTCAGTCAGGGTCCCTACCAAACCACTGTTGGAAAAAAGTGGTAGAAATGCCACCAAATATAAAGTGAGATGGAGAAATCTGCAGCAATGTCAGA…	ALA	notfound	notfound	notfound	ASP	notfound	notfound	notfound	LEU	notfound	notfound	LEU	notfound	notfound	notfound	7	Navassa Island	ANP	Insect
BCR	no	> BCR_YDL227C_HO chromosome4:46271-48031 - 692 ATGCTTTCTGAAAACACGACTATTCTGATGGCTAACGGTGAAATTAAAGACATCGCAAACGTCACGGCTAACTCTTACGTTATGTGCGCAGATGGCTCCGCTGCCCGCGTCATAAATGTCACACAGGGCTATCAGAAAATCTATAATATACAGCAAAAAACCAAACACAGAGCTTTTGAAGGTGAACCTGGTAGGTTAGATCCCAGGCGTAGAACAGTTTATCAGCGTCTTGCATTACAATGTACTGCAGGTCATAAATTGTCAGTCAGGGTCCCTACCAAACCACTGTTGGAAAAAAGTGGTAGAAATGCCACCAAATATAAAGTGAGATGGAGAAATCTGCAGCAATGTC…	BCR_YDL227C_HO chromosome4:46271-48031 - 692ATGCTTTCTGAAAACACGACTATTCTGATGGCTAACGGTGAAATTAAAGACATCGCAAACGTCACGGCTAACTCTTACGTTATGTGCGCAGATGGCTCCGCTGCCCGCGTCATAAATGTCACACAGGGCTATCAGAAAATCTATAATATACAGCAAAAAACCAAACACAGAGCTTTTGAAGGTGAACCTGGTAGGTTAGATCCCAGGCGTAGAACAGTTTATCAGCGTCTTGCATTACAATGTACTGCAGGTCATAAATTGTCAGTCAGGGTCCCTACCAAACCACTGTTGGAAAAAAGTGGTAGAAATGCCACCAAATATAAAGTGAGATGGAGAAATCTGCAGCAATGTCAGA…	ALA	notfound	notfound	notfound	ASP	notfound	notfound	notfound	LEU	notfound	notfound	LEU	notfound	notfound	notfound	7	Israel	BCR	Nature
BFG	no	> BFG_YDL227C_HO chromosome4:46271-48031 - 692 ATGCTTTCTGAAAACACGACTATTCTGATGGCTAACGGTGAAATTAAAGACATCGCAAACGTCACGGCTAACTCTTACGTTATGTGCGCAGATGGCTCCGCTGCCCGCGTCATAAATGTCACACAGGGCTATCAGAAAATCTATAATATACAGCAAAAAACCAAACACAGAGCTTTTGAAGGTGAACCTGGTAGGTTAGATCCCAGGCGTAGAACAGTTTATCAGCGTCTTGCATTACAATGTACTGCAGGTCATAAATTGTCAGTCAGGGTCCCTACCAAACCACTGTTGGAAAAAAGTGGTAGAAATGCCACCAAATATAAAGTGAGATGGAGAAATCTGCAGCAATGTC…	BFG_YDL227C_HO chromosome4:46271-48031 - 692ATGCTTTCTGAAAACACGACTATTCTGATGGCTAACGGTGAAATTAAAGACATCGCAAACGTCACGGCTAACTCTTACGTTATGTGCGCAGATGGCTCCGCTGCCCGCGTCATAAATGTCACACAGGGCTATCAGAAAATCTATAATATACAGCAAAAAACCAAACACAGAGCTTTTGAAGGTGAACCTGGTAGGTTAGATCCCAGGCGTAGAACAGTTTATCAGCGTCTTGCATTACAATGTACTGCAGGTCATAAATTGTCAGTCAGGGTCCCTACCAAACCACTGTTGGAAAAAAGTGGTAGAAATGCCACCAAATATAAAGTGAGATGGAGAAATCTGCAGCAATGTCAGA…	ALA	notfound	notfound	notfound	ASP	notfound	notfound	notfound	LEU	notfound	notfound	LEU	notfound	notfound	notfound	7	NA	BFG	Nature
ASP	no	> ASP_YDL227C_HO chromosome4:46271-48031 - 692 ATGCTTTCTGAAAACACGACTATTCTGATGGCTAACGGTGAAATTAAAGACATCGCAAACGTCACGGCTAACTCTTACGTTATGTGCGCAGATGGCTCCGCTGCCCGCGTCATAAATGTCACACAGGGCTATCAGAAAATCTATAATATACAGCAAAAAACCAAACACAGAGCTTTTGAAGGTGAACCTGGTAGGTTAGATCCCAGGCGTAGAACAGTTTATCAGCGTCTTGCATTACAATGTACTGCAGGTCATAAATTGTCAGTCAGGGTCCCTACCAAACCACTGTTGGAAAAAAGTGGTAGAAATGCCACCAAATATAAAGTGAGATGGAGAAATCTGCAGCAATGTC…	ASP_YDL227C_HO chromosome4:46271-48031 - 692ATGCTTTCTGAAAACACGACTATTCTGATGGCTAACGGTGAAATTAAAGACATCGCAAACGTCACGGCTAACTCTTACGTTATGTGCGCAGATGGCTCCGCTGCCCGCGTCATAAATGTCACACAGGGCTATCAGAAAATCTATAATATACAGCAAAAAACCAAACACAGAGCTTTTGAAGGTGAACCTGGTAGGTTAGATCCCAGGCGTAGAACAGTTTATCAGCGTCTTGCATTACAATGTACTGCAGGTCATAAATTGTCAGTCAGGGTCCCTACCAAACCACTGTTGGAAAAAAGTGGTAGAAATGCCACCAAATATAAAGTGAGATGGAGAAATCTGCAGCAATGTCAGA…	ALA	notfound	notfound	notfound	ASP	notfound	notfound	notfound	LEU	notfound	notfound	LEU	notfound	notfound	notfound	7	France	ASP	Unknown
CLG	no	> CLG_YDL227C_HO chromosome4:46271-48031 - 692 ATGCTTTCTGAAAACACGACTATTCTGATGGCTAACGGTGAAATTAAAGACATCGCAAACGTCACGGCTAACTCTTACGTTATGTGCGCAGATGGCTCCGCTGCCCGCGTCATAAATGTCACACAGGGCTATCAGAAAATCTATAATATACAGCAAAAAACCAAACACAGAGCTTTTGAAGGTGAACCTGGTAGGTTAGATCCCAGGCGTAGAACAGTTTATCAGCGTCTTTCATTACAATATACTGCAGGTCATAAATTGTCAGTCAGGGTCCCTACCAAACCACTGTTGGAAAAAAGTGGTAGAAATGCCACCAAATATAAAGTGAGATGGAGAAATCTGCAGCAATGTC…	CLG_YDL227C_HO chromosome4:46271-48031 - 692ATGCTTTCTGAAAACACGACTATTCTGATGGCTAACGGTGAAATTAAAGACATCGCAAACGTCACGGCTAACTCTTACGTTATGTGCGCAGATGGCTCCGCTGCCCGCGTCATAAATGTCACACAGGGCTATCAGAAAATCTATAATATACAGCAAAAAACCAAACACAGAGCTTTTGAAGGTGAACCTGGTAGGTTAGATCCCAGGCGTAGAACAGTTTATCAGCGTCTTTCATTACAATATACTGCAGGTCATAAATTGTCAGTCAGGGTCCCTACCAAACCACTGTTGGAAAAAAGTGGTAGAAATGCCACCAAATATAAAGTGAGATGGAGAAATCTGCAGCAATGTCAGA…	ALA	notfound	notfound	notfound	ASP	notfound	notfound	notfound	LEU	notfound	notfound	notfound	HIS	notfound	notfound	8	Nottingham, UK	CLG	Human, clinical
AQH	no	> AQH_YDL227C_HO chromosome4:46271-48031 - 692 ATGCTTTCTGAAAACACGACTATTCTGATGGCTAACGGTGAAATTAAAGACATCGCAAACGTCACGGCTAACTCTTACGTTATGTGCGCAGATGGCTCCGCTGCCCGCGTCATAAATGTCACACAGGGCTATCAGAAAATCTATAATATACAGCAAAAAACCAAACACAGAGCTTTTGAAGGTGAACCTGGTAGGTTAGATCCCAGGCGTAGAACAGTTTATCAGCGTCTTGCATTACAATGTACTGCAGGTCATAAATTGTCAGTCAGGGTCCCTACCAAACCACTGTTGGAAAAAAGTGGTAGAAATGCCACCAAATATAAAGTGAGATGGAGAAATCTGCAGCAATGTC…	AQH_YDL227C_HO chromosome4:46271-48031 - 692ATGCTTTCTGAAAACACGACTATTCTGATGGCTAACGGTGAAATTAAAGACATCGCAAACGTCACGGCTAACTCTTACGTTATGTGCGCAGATGGCTCCGCTGCCCGCGTCATAAATGTCACACAGGGCTATCAGAAAATCTATAATATACAGCAAAAAACCAAACACAGAGCTTTTGAAGGTGAACCTGGTAGGTTAGATCCCAGGCGTAGAACAGTTTATCAGCGTCTTGCATTACAATGTACTGCAGGTCATAAATTGTCAGTCAGGGTCCCTACCAAACCACTGTTGGAAAAAAGTGGTAGAAATGCCACCAAATATAAAGTGAGATGGAGAAATCTGCAGCAATGTCAGA…	ALA	notfound	notfound	notfound	notfound	notfound	GLY/SER	notfound	notfound	notfound	LEU/SER	LEU	notfound	notfound	notfound	9	Sao Paulo, Brazil	AQH	Industrial
BVB	no	> BVB_YDL227C_HO chromosome4:46271-48031 - 692 ATGCTTTCTGAAAACACGACTATTCTGATGGCTAACGGTGAAATTAAAGACATCGCAAACGTCACGGCTAACTCTTACGTTATGTGCGCAGATGGCTCCGCTGCCCGCGTCATAAATGTCACACAGGGCTATCAGAAAATCTATAATATACAGCAAAAAACCAAACACAGAGCTTTTGAAGGTGAACCTGGTAGGTTAGATCCCAGGCGTAGAACAGTTTATCAGCGTCTTGCATTACAATGTACTGCAGGTCATAAATTGTCAGTCAGGGTCCCTACCAAACCACTGTTGGAAAAAAGTGGTAGAAATGCCACCAAATATAAAGTGAGATGGAGAAATCTGCAGCAATGTC…	BVB_YDL227C_HO chromosome4:46271-48031 - 692ATGCTTTCTGAAAACACGACTATTCTGATGGCTAACGGTGAAATTAAAGACATCGCAAACGTCACGGCTAACTCTTACGTTATGTGCGCAGATGGCTCCGCTGCCCGCGTCATAAATGTCACACAGGGCTATCAGAAAATCTATAATATACAGCAAAAAACCAAACACAGAGCTTTTGAAGGTGAACCTGGTAGGTTAGATCCCAGGCGTAGAACAGTTTATCAGCGTCTTGCATTACAATGTACTGCAGGTCATAAATTGTCAGTCAGGGTCCCTACCAAACCACTGTTGGAAAAAAGTGGTAGAAATGCCACCAAATATAAAGTGAGATGGAGAAATCTGCAGCAATGTCAGA…	ALA	notfound	notfound	notfound	notfound	notfound	GLY/SER	notfound	notfound	notfound	LEU/SER	notfound	notfound	LEU/HIS	notfound	10	Brazil	BVB	Bioethanol
BVF	no	> BVF_YDL227C_HO chromosome4:46271-48031 - 692 ATGCTTTCTGAAAACACGACTATTCTGATGGCTAACGGTGAAATTAAAGACATCGCAAACGTCACGGCTAACTCTTACGTTATGTGCGCAGATGGCTCCGCTGCCCGCGTCATAAATGTCACACAGGGCTATCAGAAAATCTATAATATACAGCAAAAAACCAAACACAGAGCTTTTGAAGGTGAACCTGGTAGGTTAGATCCCAGGCGTAGAACAGTTTATCAGCGTCTTGCATTACAATGTACTGCAGGTCATAAATTGTCAGTCAGGGTCCCTACCAAACCACTGTTGGAAAAAAGTGGTAGAAATGCCACCAAATATAAAGTGAGATGGAGAAATCTGCAGCAATGTC…	BVF_YDL227C_HO chromosome4:46271-48031 - 692ATGCTTTCTGAAAACACGACTATTCTGATGGCTAACGGTGAAATTAAAGACATCGCAAACGTCACGGCTAACTCTTACGTTATGTGCGCAGATGGCTCCGCTGCCCGCGTCATAAATGTCACACAGGGCTATCAGAAAATCTATAATATACAGCAAAAAACCAAACACAGAGCTTTTGAAGGTGAACCTGGTAGGTTAGATCCCAGGCGTAGAACAGTTTATCAGCGTCTTGCATTACAATGTACTGCAGGTCATAAATTGTCAGTCAGGGTCCCTACCAAACCACTGTTGGAAAAAAGTGGTAGAAATGCCACCAAATATAAAGTGAGATGGAGAAATCTGCAGCAATGTCAGA…	ALA	notfound	notfound	notfound	notfound	notfound	GLY/SER	notfound	notfound	notfound	LEU/SER	notfound	notfound	LEU/HIS	notfound	10	Brazil	BVF	Bioethanol
BVG	no	> BVG_YDL227C_HO chromosome4:46271-48031 - 692 ATGCTTTCTGAAAACACGACTATTCTGATGGCTAACGGTGAAATTAAAGACATCGCAAACGTCACGGCTAACTCTTACGTTATGTGCGCAGATGGCTCCGCTGCCCGCGTCATAAATGTCACACAGGGCTATCAGAAAATCTATAATATACAGCAAAAAACCAAACACAGAGCTTTTGAAGGTGAACCTGGTAGGTTAGATCCCAGGCGTAGAACAGTTTATCAGCGTCTTGCATTACAATGTACTGCAGGTCATAAATTGTCAGTCAGGGTCCCTACCAAACCACTGTTGGAAAAAAGTGGTAGAAATGCCACCAAATATAAAGTGAGATGGAGAAATCTGCAGCAATGTC…	BVG_YDL227C_HO chromosome4:46271-48031 - 692ATGCTTTCTGAAAACACGACTATTCTGATGGCTAACGGTGAAATTAAAGACATCGCAAACGTCACGGCTAACTCTTACGTTATGTGCGCAGATGGCTCCGCTGCCCGCGTCATAAATGTCACACAGGGCTATCAGAAAATCTATAATATACAGCAAAAAACCAAACACAGAGCTTTTGAAGGTGAACCTGGTAGGTTAGATCCCAGGCGTAGAACAGTTTATCAGCGTCTTGCATTACAATGTACTGCAGGTCATAAATTGTCAGTCAGGGTCCCTACCAAACCACTGTTGGAAAAAAGTGGTAGAAATGCCACCAAATATAAAGTGAGATGGAGAAATCTGCAGCAATGTCAGA…	ALA	notfound	notfound	notfound	notfound	notfound	GLY/SER	notfound	notfound	notfound	LEU/SER	notfound	notfound	LEU/HIS	notfound	10	Brazil	BVG	Bioethanol
BVH	no	> BVH_YDL227C_HO chromosome4:46271-48031 - 692 ATGCTTTCTGAAAACACGACTATTCTGATGGCTAACGGTGAAATTAAAGACATCGCAAACGTCACGGCTAACTCTTACGTTATGTGCGCAGATGGCTCCGCTGCCCGCGTCATAAATGTCACACAGGGCTATCAGAAAATCTATAATATACAGCAAAAAACCAAACACAGAGCTTTTGAAGGTGAACCTGGTAGGTTAGATCCCAGGCGTAGAACAGTTTATCAGCGTCTTGCATTACAATGTACTGCAGGTCATAAATTGTCAGTCAGGGTCCCTACCAAACCACTGTTGGAAAAAAGTGGTAGAAATGCCACCAAATATAAAGTGAGATGGAGAAATCTGCAGCAATGTC…	BVH_YDL227C_HO chromosome4:46271-48031 - 692ATGCTTTCTGAAAACACGACTATTCTGATGGCTAACGGTGAAATTAAAGACATCGCAAACGTCACGGCTAACTCTTACGTTATGTGCGCAGATGGCTCCGCTGCCCGCGTCATAAATGTCACACAGGGCTATCAGAAAATCTATAATATACAGCAAAAAACCAAACACAGAGCTTTTGAAGGTGAACCTGGTAGGTTAGATCCCAGGCGTAGAACAGTTTATCAGCGTCTTGCATTACAATGTACTGCAGGTCATAAATTGTCAGTCAGGGTCCCTACCAAACCACTGTTGGAAAAAAGTGGTAGAAATGCCACCAAATATAAAGTGAGATGGAGAAATCTGCAGCAATGTCAGA…	ALA	notfound	notfound	notfound	notfound	notfound	GLY/SER	notfound	notfound	notfound	LEU/SER	notfound	notfound	LEU/HIS	notfound	10	Brazil	BVH	Bioethanol
CNB	no	> CNB_YDL227C_HO chromosome4:46271-48031 - 692 ATGCTTTCTGAAAACACGACTATTCTGATGGCTAACGGTGAAATTAAAGACATCGCAAACGTCACGGCTAACTCTTACGTTATGTGCGCAGATGGCTCCGCTGCCCGCGTCATAAATGTCACACAGGGCTATCAGAAAATCTATAATATACAGCAAAAAACCAAACACAGAGCTTTTGAAGGTGAACCTGGTAGGTTAGATCCCAGGCGTAGAACAGTTTATCAGCGTCTTGCATTACAATGTACTGCAGGTCATAAATTGTCAGTCAGGGTCCCTACCAAACCACTGTTGGAAAAAAGTGGTAGAAATGCCACCAAATATAAAGTGAGATGGAGAAATCTGCAGCAATGTC…	CNB_YDL227C_HO chromosome4:46271-48031 - 692ATGCTTTCTGAAAACACGACTATTCTGATGGCTAACGGTGAAATTAAAGACATCGCAAACGTCACGGCTAACTCTTACGTTATGTGCGCAGATGGCTCCGCTGCCCGCGTCATAAATGTCACACAGGGCTATCAGAAAATCTATAATATACAGCAAAAAACCAAACACAGAGCTTTTGAAGGTGAACCTGGTAGGTTAGATCCCAGGCGTAGAACAGTTTATCAGCGTCTTGCATTACAATGTACTGCAGGTCATAAATTGTCAGTCAGGGTCCCTACCAAACCACTGTTGGAAAAAAGTGGTAGAAATGCCACCAAATATAAAGTGAGATGGAGAAATCTGCAGCAATGTCAGA…	ALA	notfound	notfound	notfound	notfound	notfound	GLY/SER	notfound	notfound	notfound	LEU/SER	notfound	notfound	LEU/HIS	notfound	10	Brazil	CNB	Bioethanol
CNF	no	> CNF_YDL227C_HO chromosome4:46271-48031 - 692 ATGCTTTCTGAAAACACGACTATTCTGATGGCTAACGGTGAAATTAAAGACATCGCAAACGTCACGGCTAACTCTTACGTTATGTGCGCAGATGGCTCCGCTGCCCGCGTCATAAATGTCACACAGGGCTATCAGAAAATCTATAATATACAGCAAAAAACCAAACACAGAGCTTTTGAAGGTGAACCTGGTAGGTTAGATCCCAGGCGTAGAACAGTTTATCAGCGTCTTGCATTACAATGTACTGCAGGTCATAAATTGTCAGTCAGGGTCCCTACCAAACCACTGTTGGAAAAAAGTGGTAGAAATGCCACCAAATATAAAGTGAGATGGAGAAATCTGCAGCAATGTC…	CNF_YDL227C_HO chromosome4:46271-48031 - 692ATGCTTTCTGAAAACACGACTATTCTGATGGCTAACGGTGAAATTAAAGACATCGCAAACGTCACGGCTAACTCTTACGTTATGTGCGCAGATGGCTCCGCTGCCCGCGTCATAAATGTCACACAGGGCTATCAGAAAATCTATAATATACAGCAAAAAACCAAACACAGAGCTTTTGAAGGTGAACCTGGTAGGTTAGATCCCAGGCGTAGAACAGTTTATCAGCGTCTTGCATTACAATGTACTGCAGGTCATAAATTGTCAGTCAGGGTCCCTACCAAACCACTGTTGGAAAAAAGTGGTAGAAATGCCACCAAATATAAAGTGAGATGGAGAAATCTGCAGCAATGTCAGA…	ALA	notfound	notfound	notfound	notfound	notfound	GLY/SER	notfound	notfound	notfound	LEU/SER	notfound	notfound	LEU/HIS	notfound	10	Brazil	CNF	Bioethanol
CNL	no	> CNL_YDL227C_HO chromosome4:46271-48031 - 692 ATGCTTTCTGAAAACACGACTATTCTGATGGCTAACGGTGAAATTAAAGACATCGCAAACGTCACGGCTAACTCTTACGTTATGTGCGCAGATGGCTCCGCTGCCCGCGTCATAAATGTCACACAGGGCTATCAGAAAATCTATAATATACAGCAAAAAACCAAACACAGAGCTTTTGAAGGTGAACCTGGTAGGTTAGATCCCAGGCGTAGAACAGTTTATCAGCGTCTTGCATTACAATGTACTGCAGGTCATAAATTGTCAGTCAGGGTCCCTACCAAACCACTGTTGGAAAAAAGTGGTAGAAATGCCACCAAATATAAAGTGAGATGGAGAAATCTGCAGCAATGTC…	CNL_YDL227C_HO chromosome4:46271-48031 - 692ATGCTTTCTGAAAACACGACTATTCTGATGGCTAACGGTGAAATTAAAGACATCGCAAACGTCACGGCTAACTCTTACGTTATGTGCGCAGATGGCTCCGCTGCCCGCGTCATAAATGTCACACAGGGCTATCAGAAAATCTATAATATACAGCAAAAAACCAAACACAGAGCTTTTGAAGGTGAACCTGGTAGGTTAGATCCCAGGCGTAGAACAGTTTATCAGCGTCTTGCATTACAATGTACTGCAGGTCATAAATTGTCAGTCAGGGTCCCTACCAAACCACTGTTGGAAAAAAGTGGTAGAAATGCCACCAAATATAAAGTGAGATGGAGAAATCTGCAGCAATGTCAGA…	ALA	notfound	notfound	notfound	notfound	notfound	GLY/SER	notfound	notfound	notfound	LEU/SER	notfound	notfound	LEU/HIS	notfound	10	Brazil	CNL	Bioethanol
CNN	no	> CNN_YDL227C_HO chromosome4:46271-48031 - 692 ATGCTTTCTGAAAACACGACTATTCTGATGGCTAACGGTGAAATTAAAGACATCGCAAACGTCACGGCTAACTCTTACGTTATGTGCGCAGATGGCTCCGCTGCCCGCGTCATAAATGTCACACAGGGCTATCAGAAAATCTATAATATACAGCAAAAAACCAAACACAGAGCTTTTGAAGGTGAACCTGGTAGGTTAGATCCCAGGCGTAGAACAGTTTATCAGCGTCTTGCATTACAATGTACTGCAGGTCATAAATTGTCAGTCAGGGTCCCTACCAAACCACTGTTGGAAAAAAGTGGTAGAAATGCCACCAAATATAAAGTGAGATGGAGAAATCTGCAGCAATGTC…	CNN_YDL227C_HO chromosome4:46271-48031 - 692ATGCTTTCTGAAAACACGACTATTCTGATGGCTAACGGTGAAATTAAAGACATCGCAAACGTCACGGCTAACTCTTACGTTATGTGCGCAGATGGCTCCGCTGCCCGCGTCATAAATGTCACACAGGGCTATCAGAAAATCTATAATATACAGCAAAAAACCAAACACAGAGCTTTTGAAGGTGAACCTGGTAGGTTAGATCCCAGGCGTAGAACAGTTTATCAGCGTCTTGCATTACAATGTACTGCAGGTCATAAATTGTCAGTCAGGGTCCCTACCAAACCACTGTTGGAAAAAAGTGGTAGAAATGCCACCAAATATAAAGTGAGATGGAGAAATCTGCAGCAATGTCAGA…	ALA	notfound	notfound	notfound	notfound	notfound	GLY/SER	notfound	notfound	notfound	LEU/SER	notfound	notfound	LEU/HIS	notfound	10	Brazil	CNN	Bioethanol
CNS	no	> CNS_YDL227C_HO chromosome4:46271-48031 - 692 ATGCTTTCTGAAAACACGACTATTCTGATGGCTAACGGTGAAATTAAAGACATCGCAAACGTCACGGCTAACTCTTACGTTATGTGCGCAGATGGCTCCGCTGCCCGCGTCATAAATGTCACACAGGGCTATCAGAAAATCTATAATATACAGCAAAAAACCAAACACAGAGCTTTTGAAGGTGAACCTGGTAGGTTAGATCCCAGGCGTAGAACAGTTTATCAGCGTCTTGCATTACAATGTACTGCAGGTCATAAATTGTCAGTCAGGGTCCCTACCAAACCACTGTTGGAAAAAAGTGGTAGAAATGCCACCAAATATAAAGTGAGATGGAGAAATCTGCAGCAATGTC…	CNS_YDL227C_HO chromosome4:46271-48031 - 692ATGCTTTCTGAAAACACGACTATTCTGATGGCTAACGGTGAAATTAAAGACATCGCAAACGTCACGGCTAACTCTTACGTTATGTGCGCAGATGGCTCCGCTGCCCGCGTCATAAATGTCACACAGGGCTATCAGAAAATCTATAATATACAGCAAAAAACCAAACACAGAGCTTTTGAAGGTGAACCTGGTAGGTTAGATCCCAGGCGTAGAACAGTTTATCAGCGTCTTGCATTACAATGTACTGCAGGTCATAAATTGTCAGTCAGGGTCCCTACCAAACCACTGTTGGAAAAAAGTGGTAGAAATGCCACCAAATATAAAGTGAGATGGAGAAATCTGCAGCAATGTCAGA…	ALA	notfound	notfound	notfound	notfound	notfound	GLY/SER	notfound	notfound	notfound	LEU/SER	notfound	notfound	LEU/HIS	notfound	10	Brazil	CNS	Bioethanol
CNT	no	> CNT_YDL227C_HO chromosome4:46271-48031 - 692 ATGCTTTCTGAAAACACGACTATTCTGATGGCTAACGGTGAAATTAAAGACATCGCAAACGTCACGGCTAACTCTTACGTTATGTGCGCAGATGGCTCCGCTGCCCGCGTCATAAATGTCACACAGGGCTATCAGAAAATCTATAATATACAGCAAAAAACCAAACACAGAGCTTTTGAAGGTGAACCTGGTAGGTTAGATCCCAGGCGTAGAACAGTTTATCAGCGTCTTGCATTACAATGTACTGCAGGTCATAAATTGTCAGTCAGGGTCCCTACCAAACCACTGTTGGAAAAAAGTGGTAGAAATGCCACCAAATATAAAGTGAGATGGAGAAATCTGCAGCAATGTC…	CNT_YDL227C_HO chromosome4:46271-48031 - 692ATGCTTTCTGAAAACACGACTATTCTGATGGCTAACGGTGAAATTAAAGACATCGCAAACGTCACGGCTAACTCTTACGTTATGTGCGCAGATGGCTCCGCTGCCCGCGTCATAAATGTCACACAGGGCTATCAGAAAATCTATAATATACAGCAAAAAACCAAACACAGAGCTTTTGAAGGTGAACCTGGTAGGTTAGATCCCAGGCGTAGAACAGTTTATCAGCGTCTTGCATTACAATGTACTGCAGGTCATAAATTGTCAGTCAGGGTCCCTACCAAACCACTGTTGGAAAAAAGTGGTAGAAATGCCACCAAATATAAAGTGAGATGGAGAAATCTGCAGCAATGTCAGA…	ALA	notfound	notfound	notfound	notfound	notfound	GLY/SER	notfound	notfound	notfound	LEU/SER	notfound	notfound	LEU/HIS	notfound	10	Brazil	CNT	Bioethanol
CKN	no	> CKN_YDL227C_HO chromosome4:46271-48031 - 692 ATGCTTTCTGAAAACACGACTATTCTGATGGCTAACGGTGAAATTAAAGACATCGCAAACGTCACGGCTAACTCTTACGTTATGTGCGCAGATGGCTCCGCTGCCCGCGTCATAAATGTCACACAGGGCTATCAGAAAATCTATAATATACAGCAAAAAACCAAACACAGAGCTTTTGAAGGTGAACCTGGTAGGTTAGATCCCAGGCGTAGAACAGTTTATCAGCGTCTTGCATTACAATGTACTGCAGGTCATAAATTGTCAGTCAGGGTCCCTACCAAACCACTGTTGGAAAAAAGTGGTAGAAATGCCACCAAATATAAAGTGAGATGGAGAAATCTGCAGCAATGTC…	CKN_YDL227C_HO chromosome4:46271-48031 - 692ATGCTTTCTGAAAACACGACTATTCTGATGGCTAACGGTGAAATTAAAGACATCGCAAACGTCACGGCTAACTCTTACGTTATGTGCGCAGATGGCTCCGCTGCCCGCGTCATAAATGTCACACAGGGCTATCAGAAAATCTATAATATACAGCAAAAAACCAAACACAGAGCTTTTGAAGGTGAACCTGGTAGGTTAGATCCCAGGCGTAGAACAGTTTATCAGCGTCTTGCATTACAATGTACTGCAGGTCATAAATTGTCAGTCAGGGTCCCTACCAAACCACTGTTGGAAAAAAGTGGTAGAAATGCCACCAAATATAAAGTGAGATGGAGAAATCTGCAGCAATGTCAGA…	ALA	notfound	notfound	notfound	notfound	notfound	GLY/SER	notfound	notfound	notfound	LEU/SER	notfound	notfound	LEU/HIS	notfound	10	Amiens, France	CKN	Human, clinical
AAC	no	> AAC_YDL227C_HO chromosome4:46271-48031 - 692ATRCTTTCTGAAAACACGACTATTCTGATGGCTAACGGTGAAATTAAAGACATCGCAAACGTCACGGYTAACTCTTACGTTATGTGCGCAGATGGCTCCGCTGCCCGCGTCATAAATGTCACACAGGGCTATCAGAAAATCTATAATATACAGCAAAAAACCAAACACAGAGCTTTTGAAGGTGAAYCTGGTAGGTTAGATCCCAGGCGTAGAACAGTTTATCAGCGTCTTGCATTACAATGTACTGCAGGTCATAAATTGTCAGTCAGGGTCCCTACCAAACCACTGTTGGAAAAAAGTGGTAGAAATGCCACCAAATATAAAGTGAGATGGAGAAATCTGCAGCAATGTCA…	AAC_YDL227C_HO chromosome4:46271-48031 - 692ATRCTTTCTGAAAACACGACTATTCTGATGGCTAACGGTGAAATTAAAGACATCGCAAACGTCACGGYTAACTCTTACGTTATGTGCGCAGATGGCTCCGCTGCCCGCGTCATAAATGTCACACAGGGCTATCAGAAAATCTATAATATACAGCAAAAAACCAAACACAGAGCTTTTGAAGGTGAAYCTGGTAGGTTAGATCCCAGGCGTAGAACAGTTTATCAGCGTCTTGCATTACAATGTACTGCAGGTCATAAATTGTCAGTCAGGGTCCCTACCAAACCACTGTTGGAAAAAAGTGGTAGAAATGCCACCAAATATAAAGTGAGATGGAGAAATCTGCAGCAATGTCAGA…	ALA	notfound	notfound	notfound	notfound	notfound	GLY/SER	notfound	LEU	notfound	notfound	LEU	notfound	notfound	notfound	11	England	AAC	Beer
AGB	no	> AGB_YDL227C_HO chromosome4:46271-48031 - 692 ATGCTTTCTGAAAACACGACTATTCTGATGGCTAACGGTGAAATTAAAGACATCGCAAACGTCACGGYTAACTCTTACGTTATGTGCGCAGATGGCTCCGCTGCCCGCGTCATAAATGTCACACAGGGCTATCAGAAAATCTATAATATACAGCAAAAAACCAAACACAGAGCTTTTGAAGGTGAACCTGGTAGGTTAGATCCCAGGCGTAGAACAGTTTATCAGCGTCTTGCATTACAATGTACTGCAGGTCATAAATTGTCAGTCAGGGTCCCTACCAAACCACTGTTGGAAAAAAGTGGTAGAAATGCCACCAAATATAAAGTGAGATGGAGAAATCTGCAGCAATGTC…	AGB_YDL227C_HO chromosome4:46271-48031 - 692ATGCTTTCTGAAAACACGACTATTCTGATGGCTAACGGTGAAATTAAAGACATCGCAAACGTCACGGYTAACTCTTACGTTATGTGCGCAGATGGCTCCGCTGCCCGCGTCATAAATGTCACACAGGGCTATCAGAAAATCTATAATATACAGCAAAAAACCAAACACAGAGCTTTTGAAGGTGAACCTGGTAGGTTAGATCCCAGGCGTAGAACAGTTTATCAGCGTCTTGCATTACAATGTACTGCAGGTCATAAATTGTCAGTCAGGGTCCCTACCAAACCACTGTTGGAAAAAAGTGGTAGAAATGCCACCAAATATAAAGTGAGATGGAGAAATCTGCAGCAATGTCAGA…	ALA	notfound	notfound	notfound	notfound	notfound	GLY/SER	notfound	LEU	notfound	notfound	LEU	notfound	notfound	notfound	11	South Yorkshire, UK	AGB	Beer
ATV	no	> ATV_YDL227C_HO chromosome4:46271-48031 - 692 ATGCTTTCTGAAAACACGACTATTCTGATGGCTAACGGTGAAATTAAAGACATCGCAAACGTCACGGCTAACTCTTACGTTATGTGCGCAGATGGCTCCGCTGCCCGCGTCATAAATGTCACACAGGGCTATCAGAAAATCTATAATATACAGCAAAAAACCAAACAYAGAGCTTTTGAAGGTGAACCTGGTAGGTTAGATCCCAGGCGTAGAACAGTTTATCAGCGTCTTGCATTACAATGTACTGCAGGTCATAAATTGTCAGTCAGGGTCCCTACCAAACCACTGTTGGAAAAAAGTGGTAGAAATGCCACCAAATATAAAGTGAGATGGAGAAATCTGCAGCAATGTC…	ATV_YDL227C_HO chromosome4:46271-48031 - 692ATGCTTTCTGAAAACACGACTATTCTGATGGCTAACGGTGAAATTAAAGACATCGCAAACGTCACGGCTAACTCTTACGTTATGTGCGCAGATGGCTCCGCTGCCCGCGTCATAAATGTCACACAGGGCTATCAGAAAATCTATAATATACAGCAAAAAACCAAACAYAGAGCTTTTGAAGGTGAACCTGGTAGGTTAGATCCCAGGCGTAGAACAGTTTATCAGCGTCTTGCATTACAATGTACTGCAGGTCATAAATTGTCAGTCAGGGTCCCTACCAAACCACTGTTGGAAAAAAGTGGTAGAAATGCCACCAAATATAAAGTGAGATGGAGAAATCTGCAGCAATGTCAGA…	ALA	notfound	notfound	notfound	notfound	notfound	GLY/SER	notfound	LEU	notfound	notfound	LEU	notfound	notfound	notfound	11	UK	ATV	Beer
CFD	no	> CFD_YDL227C_HO chromosome4:46271-48031 - 692 ATGCTTTCTGAAAACACGACTATTCTGATGGCTAACGGTGAAATTAAAGACATCGCAAACGTCACGGCTAACTCTTACGTTATGTGCGCAGATGGCTCCGCTGCCCGCGTCATAAATGTCACACAGGGCTATCAGAAAATCTATAATATACAGCAAAAAACCAAACAYAGAGCTTTTGAAGGTGAACCTGGTAGGTTAGATCCCAGGCGTAGAACAGTTTATCAGCGTCTTGCATTACAATGTACTGCAGGTCATAAATTGTCAGTCAGGGTCCCTACCAAACCACTGTTGGAAAAAAGTGGTAGAAATGCCACCAAATATAAAGTGAGATGGAGAAATCTGCAGCAATGTC…	CFD_YDL227C_HO chromosome4:46271-48031 - 692ATGCTTTCTGAAAACACGACTATTCTGATGGCTAACGGTGAAATTAAAGACATCGCAAACGTCACGGCTAACTCTTACGTTATGTGCGCAGATGGCTCCGCTGCCCGCGTCATAAATGTCACACAGGGCTATCAGAAAATCTATAATATACAGCAAAAAACCAAACAYAGAGCTTTTGAAGGTGAACCTGGTAGGTTAGATCCCAGGCGTAGAACAGTTTATCAGCGTCTTGCATTACAATGTACTGCAGGTCATAAATTGTCAGTCAGGGTCCCTACCAAACCACTGTTGGAAAAAAGTGGTAGAAATGCCACCAAATATAAAGTGAGATGGAGAAATCTGCAGCAATGTCAGA…	ALA	notfound	notfound	notfound	notfound	notfound	GLY/SER	notfound	LEU	notfound	notfound	LEU	notfound	notfound	notfound	11	USA	CFD	Beer
CFH	no	> CFH_YDL227C_HO chromosome4:46271-48031 - 692 ATGCTTTCTGAAAACACGACTATTCTGATGGCTAACGGTGAAATTAAAGACATCGCAAACGTCACGGYTAACTCTTACGTTATGTGCGCAGATGGCTCCGCTGCCCGCGTCATAAATGTCACACAGGGCTATCAGAAAATCTATAATATACAGCAAAAAACCAAACACAGAGCTTTTGAAGGTGAACCTGGTAGGTTAGATCCCAGGCGTAGAACAGTTTATCAGCGTCTTGCATTACAATGTACTGCAGGTCATAAATTGTCAGTCAGGGTCCCTACCAAACCACTGTTGGAAAAAAGTGGTAGAAATGCCACCAAATATAAAGTGAGATGGAGAAATCTGCAGCAATGTC…	CFH_YDL227C_HO chromosome4:46271-48031 - 692ATGCTTTCTGAAAACACGACTATTCTGATGGCTAACGGTGAAATTAAAGACATCGCAAACGTCACGGYTAACTCTTACGTTATGTGCGCAGATGGCTCCGCTGCCCGCGTCATAAATGTCACACAGGGCTATCAGAAAATCTATAATATACAGCAAAAAACCAAACACAGAGCTTTTGAAGGTGAACCTGGTAGGTTAGATCCCAGGCGTAGAACAGTTTATCAGCGTCTTGCATTACAATGTACTGCAGGTCATAAATTGTCAGTCAGGGTCCCTACCAAACCACTGTTGGAAAAAAGTGGTAGAAATGCCACCAAATATAAAGTGAGATGGAGAAATCTGCAGCAATGTCAGA…	ALA	notfound	notfound	notfound	notfound	notfound	GLY/SER	notfound	LEU	notfound	notfound	LEU	notfound	notfound	notfound	11	UK	CFH	Beer
CFM	no	> CFM_YDL227C_HO chromosome4:46271-48031 - 692 ATGCTTTCTGAAAACACGACTATTCTGATGGCTAACGGTGAAATTAAAGACATCGCAAACGTCACGGCTAACTCTTACGTTATGTGCGCAGATGGCTCCGCTGCCCGCGTCATAAATGTCACACAGGGCTATCAGAAAATCTATAATATACAGCAAAAAACCAAACAYAGAGCTTTTGAAGGTGAACCTGGTAGGTTAGATCCCAGGCGTAGAACAGTTTATCAGCGTCTTGCATTACAATGTACTGCAGGTCATAAATTGTCAGTCAGGGTCCCTACCAAACCACTGTTGGAAAAAAGTGGTAGAAATGCCACCAAATATAAAGTGAGATGGAGAAATCTGCAGCAATGTC…	CFM_YDL227C_HO chromosome4:46271-48031 - 692ATGCTTTCTGAAAACACGACTATTCTGATGGCTAACGGTGAAATTAAAGACATCGCAAACGTCACGGCTAACTCTTACGTTATGTGCGCAGATGGCTCCGCTGCCCGCGTCATAAATGTCACACAGGGCTATCAGAAAATCTATAATATACAGCAAAAAACCAAACAYAGAGCTTTTGAAGGTGAACCTGGTAGGTTAGATCCCAGGCGTAGAACAGTTTATCAGCGTCTTGCATTACAATGTACTGCAGGTCATAAATTGTCAGTCAGGGTCCCTACCAAACCACTGTTGGAAAAAAGTGGTAGAAATGCCACCAAATATAAAGTGAGATGGAGAAATCTGCAGCAATGTCAGA…	ALA	notfound	notfound	notfound	notfound	notfound	GLY/SER	notfound	LEU	notfound	notfound	LEU	notfound	notfound	notfound	11	San Diego, USA	CFM	Beer
AQM	no	> AQM_YDL227C_HO chromosome4:46271-48031 - 692 ATGCTTTCTGAAAACACGACTATTCTGATGGCTAACGGTGAAATTAAAGACATCGCAAACGTCACGGCTAACTCTTACGTTATGTGCGCAGATGGCTCCGCTGCCCGCGTCATAAATGTCACACAGGGCTATCAGAAAATCTATAATATACAGCAAAAAACCAAACACAGAGCTTTTGAAGGTGAACCTGGTAGGTTAGATCCCAGGCGTAGAACAGTTTATCAGCGTCTTGCATTACAATGTACTGCAGGTCATAAATTRTCAGTCAGGGTCCCTACCAAACCACTGTTGGAAAAAARTGGTAGAAATGCCACCAAATATAAAGTGAGATGGAGAAATCTGCAGCAATGTC…	AQM_YDL227C_HO chromosome4:46271-48031 - 692ATGCTTTCTGAAAACACGACTATTCTGATGGCTAACGGTGAAATTAAAGACATCGCAAACGTCACGGCTAACTCTTACGTTATGTGCGCAGATGGCTCCGCTGCCCGCGTCATAAATGTCACACAGGGCTATCAGAAAATCTATAATATACAGCAAAAAACCAAACACAGAGCTTTTGAAGGTGAACCTGGTAGGTTAGATCCCAGGCGTAGAACAGTTTATCAGCGTCTTGCATTACAATGTACTGCAGGTCATAAATTRTCAGTCAGGGTCCCTACCAAACCACTGTTGGAAAAAARTGGTAGAAATGCCACCAAATATAAAGTGAGATGGAGAAATCTGCAGCAATGTCAGA…	ALA	notfound	notfound	notfound	notfound	notfound	GLY/SER	notfound	LEU	notfound	notfound	LEU	notfound	notfound	notfound	11	Italy	AQM	Dairy
ARS	no	> ARS_YDL227C_HO chromosome4:46271-48031 - 692 ATGCTTTCTGAAAACACGACTATTCTGATGGCTAACGGTGAAATTAAAGACATCGCAAACGTCACGGCTAACTCTTACGTTATGTGCGCAGATRGCTCCGCTGCCCRCGTCATAAATGTCACACAGGGCTATCAGAAAATCTATAATATACAGCAAAAAACCAAACACAGAGCTTTTGAAGGTGAACCTGGTAGGTTAGATCCCAGGCGTAGAACAGTTTATCAGCGTCTTGCATTACAATGTACTGCAGGTCATAAATTRTCAGTCAGGGTCCCTACCAAACCACTGTTGGAAAAAAGTGGTAGAAATGCCACCAAATATAAAGTGAGATGGAGAAATCTGCAGCAATGTC…	ARS_YDL227C_HO chromosome4:46271-48031 - 692ATGCTTTCTGAAAACACGACTATTCTGATGGCTAACGGTGAAATTAAAGACATCGCAAACGTCACGGCTAACTCTTACGTTATGTGCGCAGATRGCTCCGCTGCCCRCGTCATAAATGTCACACAGGGCTATCAGAAAATCTATAATATACAGCAAAAAACCAAACACAGAGCTTTTGAAGGTGAACCTGGTAGGTTAGATCCCAGGCGTAGAACAGTTTATCAGCGTCTTGCATTACAATGTACTGCAGGTCATAAATTRTCAGTCAGGGTCCCTACCAAACCACTGTTGGAAAAAAGTGGTAGAAATGCCACCAAATATAAAGTGAGATGGAGAAATCTGCAGCAATGTCAGA…	ALA	notfound	notfound	notfound	notfound	notfound	GLY/SER	notfound	LEU	notfound	notfound	LEU	notfound	notfound	notfound	11	NA	ARS	Nature
BFN	no	> BFN_YDL227C_HO chromosome4:46271-48031 - 692 ATGCTTTCTGAAAACACGACTATTCTGATGGCTAACGGTGAAATTAAAGACATCGCAAACGTCACGGCTAACTCTTACGTTATGTGCGCAGATGGCTCCGCTGCCCGCGTCATAAATGTCACACAGGGCTATCAGAAAATCTATAATATACAGCAAAAAACCAAACACAGAGCTTTTGAAGGTGAACCTGGTAGGTTAGATCCCAGGCGTAGAACAGTTTATCAGCGTCTTGCATTACAATGTACTGCAGGTCATAAATTRTCAGTCAGGGTCCCTACCAAACCACTGTTGGAAAAAARTGGTAGAAATGCCACCAAATATAAAGTGAGATGGAGAAATCTGCAGCAATGTC…	BFN_YDL227C_HO chromosome4:46271-48031 - 692ATGCTTTCTGAAAACACGACTATTCTGATGGCTAACGGTGAAATTAAAGACATCGCAAACGTCACGGCTAACTCTTACGTTATGTGCGCAGATGGCTCCGCTGCCCGCGTCATAAATGTCACACAGGGCTATCAGAAAATCTATAATATACAGCAAAAAACCAAACACAGAGCTTTTGAAGGTGAACCTGGTAGGTTAGATCCCAGGCGTAGAACAGTTTATCAGCGTCTTGCATTACAATGTACTGCAGGTCATAAATTRTCAGTCAGGGTCCCTACCAAACCACTGTTGGAAAAAARTGGTAGAAATGCCACCAAATATAAAGTGAGATGGAGAAATCTGCAGCAATGTCAGA…	ALA	notfound	notfound	notfound	notfound	notfound	GLY/SER	notfound	LEU	notfound	notfound	LEU	notfound	notfound	notfound	11	Serbia	BFN	Tree
BPI	no	> BPI_YDL227C_HO chromosome4:46271-48031 - 692 ATGCTTTCTGAAAACACGACTATTCTGATGGCTAACGGTGAAATTAAAGACATCGCAAACGTCACGGCTAACTCTTACGTTATGTGCGCAGATGGCTCCGCTGCCCGCGTCATAAATGTCACACAGGGCTATCAGAAAATCTATAATATACAGCAAAAAACCAAACACAGAGCTTTTGAAGGTGAACCTGGTAGGTTAGATCCCAGGCGTAGAACAGTTTATCAGCGTCTTGCATTACAATGTACTGCAGGTCATAAATTGTCAGTCAGGGTCCCTACCAAACCACTGTTGGAAAAAAGTGGTAGAAATGCCACCAAATATAAAGTGAGATGGAGAAATCTGCAGCAATGTC…	BPI_YDL227C_HO chromosome4:46271-48031 - 692ATGCTTTCTGAAAACACGACTATTCTGATGGCTAACGGTGAAATTAAAGACATCGCAAACGTCACGGCTAACTCTTACGTTATGTGCGCAGATGGCTCCGCTGCCCGCGTCATAAATGTCACACAGGGCTATCAGAAAATCTATAATATACAGCAAAAAACCAAACACAGAGCTTTTGAAGGTGAACCTGGTAGGTTAGATCCCAGGCGTAGAACAGTTTATCAGCGTCTTGCATTACAATGTACTGCAGGTCATAAATTGTCAGTCAGGGTCCCTACCAAACCACTGTTGGAAAAAAGTGGTAGAAATGCCACCAAATATAAAGTGAGATGGAGAAATCTGCAGCAATGTCAGA…	ALA	notfound	notfound	notfound	notfound	notfound	GLY/SER	notfound	LEU	notfound	notfound	LEU	notfound	notfound	notfound	11	Ethiopia	BPI	Unknown
APL	no	> APL_YDL227C_HO chromosome4:46271-48031 - 692 ATGCTTTCTGAAAACACGACTATTCTGATGGCTAACGGTGAAATTAAAGACATCGCAAACGTCACGGCTAACTCTTACGTTATGTGCGCAGATGGCTCCGCTGCCCGCGTCATAAATGTCACACAGGGCTATCAGAAAATCTATAATATACAGCAAAAAACCAAACACAGAGCTTTTGAAGGTGAACCTGGTAGGTTAGATCCCAGGCGTAGAACAGTTTATCAGCGTCTTGCATTACAATGTACTGCAGGTCATAAATTGTCAGTCAGGGTCCCTACCAAACCACTGTTGGAAAAAAGTGGTAGAAATGCCACCAAATATAAAGTGAGATGGAGAAATCTGCAGCAATGTC…	APL_YDL227C_HO chromosome4:46271-48031 - 692ATGCTTTCTGAAAACACGACTATTCTGATGGCTAACGGTGAAATTAAAGACATCGCAAACGTCACGGCTAACTCTTACGTTATGTGCGCAGATGGCTCCGCTGCCCGCGTCATAAATGTCACACAGGGCTATCAGAAAATCTATAATATACAGCAAAAAACCAAACACAGAGCTTTTGAAGGTGAACCTGGTAGGTTAGATCCCAGGCGTAGAACAGTTTATCAGCGTCTTGCATTACAATGTACTGCAGGTCATAAATTGTCAGTCAGGGTCCCTACCAAACCACTGTTGGAAAAAAGTGGTAGAAATGCCACCAAATATAAAGTGAGATGGAGAAATCTGCAGCAATGTCAGA…	ALA	notfound	notfound	notfound	notfound	notfound	notfound	GLY/ASP	LEU	notfound	notfound	LEU	notfound	notfound	notfound	12	Turkey	APL	Bakery
BTB	no	> BTB_YDL227C_HO chromosome4:46271-48031 - 692 ATGCTTTCTGAAAACACGACTATTCTGATGGCTAACGGTGAAATTAAAGACATCGCAAACGTCACGGCTAACTCTTACGTTATGTGCGCAGATGGCTCCGCTGCCCGCGTCATAAATGTCACACAGGGCTATCAGAAAATCTATAATATACAGCAAAAAACCAAACACAGAGCTTTTGAAGGTGAACCTGGTAGGTTAGATCCCAGGCRTAGAACAGTTTATCAGCGTCTTGCATTACAATGTACTGCAGGTCATAAATTGTCAGTCAGGGTCCCTACCAAACCACTGTTGGAAAAAAGTGGTAGAAATGCCACCAAATATAAAGTGAGATGGAGAAATCTGCAGCAATGTC…	BTB_YDL227C_HO chromosome4:46271-48031 - 692ATGCTTTCTGAAAACACGACTATTCTGATGGCTAACGGTGAAATTAAAGACATCGCAAACGTCACGGCTAACTCTTACGTTATGTGCGCAGATGGCTCCGCTGCCCGCGTCATAAATGTCACACAGGGCTATCAGAAAATCTATAATATACAGCAAAAAACCAAACACAGAGCTTTTGAAGGTGAACCTGGTAGGTTAGATCCCAGGCRTAGAACAGTTTATCAGCGTCTTGCATTACAATGTACTGCAGGTCATAAATTGTCAGTCAGGGTCCCTACCAAACCACTGTTGGAAAAAAGTGGTAGAAATGCCACCAAATATAAAGTGAGATGGAGAAATCTGCAGCAATGTCAGA…	ALA	notfound	notfound	notfound	notfound	notfound	notfound	GLY/ASP	LEU	notfound	notfound	LEU	notfound	notfound	notfound	12	NA	BTB	Bakery
CHI	no	> CHI_YDL227C_HO chromosome4:46271-48031 - 692 ATGCTTTCTGAAAACACGACTATTCTGATGGCTAACGGTGAAATTAAAGACATCGCAAACGTCACGGCTAACTCTTACGTTATGTGCGCAGATGGCTCCGCTGCCCGCGTCATAAATGTCACACAGGGCTATCAGAAAATCTATAATATACAGCAAAAAACCAAACACAGAGCTTTTGAAGGTGAACCTGGTAGGTTAGATCCCAGGCGTAGAACAGTTTATCAGCGTCTTGCATTACAATGTACTGCAGGTCATAAATTGTCAGTCAGGGTCCCTACCAAACCACTGTTGGAAAAAAGTGGTAGAAATGCCACCAAATATAAAGTGAGATGGAGAAATCTGCAGCAATGTC…	CHI_YDL227C_HO chromosome4:46271-48031 - 692ATGCTTTCTGAAAACACGACTATTCTGATGGCTAACGGTGAAATTAAAGACATCGCAAACGTCACGGCTAACTCTTACGTTATGTGCGCAGATGGCTCCGCTGCCCGCGTCATAAATGTCACACAGGGCTATCAGAAAATCTATAATATACAGCAAAAAACCAAACACAGAGCTTTTGAAGGTGAACCTGGTAGGTTAGATCCCAGGCGTAGAACAGTTTATCAGCGTCTTGCATTACAATGTACTGCAGGTCATAAATTGTCAGTCAGGGTCCCTACCAAACCACTGTTGGAAAAAAGTGGTAGAAATGCCACCAAATATAAAGTGAGATGGAGAAATCTGCAGCAATGTCAGA…	ALA	notfound	notfound	notfound	notfound	notfound	notfound	GLY/ASP	LEU	notfound	notfound	LEU	notfound	notfound	notfound	12	USA	CHI	Bakery
AEB	no	> AEB_YDL227C_HO chromosome4:46271-48031 - 692 ATGCTTTCTGAAAACACGACTATTCTGATGGCTAACGGTGAAATTAAAGACATCGCAAACGTCACGGCTAACTCTTACGTTATGTGCGCAGATGGCTCCGCTGCCCGCGTCATAAATGTCACACAGGGCTATCAGAAAATCTATAATATACAGCAAAAAACCAAACACAGAGCTTTTGAAGGTGAACCTGGTAGGTTAGATCCCAGGCGTAGAACAGTTTATCAGCGTCTTGCATTACAATGTACTGCAGGTCATAAATTGTCAGTCAGGGTCCCTACCAAACCACTGTTGGAAAAAAGTGGTAGAAATGCCACCAAATATAAAGTGAGATGGAGAAATCTGCAGCAATGTC…	AEB_YDL227C_HO chromosome4:46271-48031 - 692ATGCTTTCTGAAAACACGACTATTCTGATGGCTAACGGTGAAATTAAAGACATCGCAAACGTCACGGCTAACTCTTACGTTATGTGCGCAGATGGCTCCGCTGCCCGCGTCATAAATGTCACACAGGGCTATCAGAAAATCTATAATATACAGCAAAAAACCAAACACAGAGCTTTTGAAGGTGAACCTGGTAGGTTAGATCCCAGGCGTAGAACAGTTTATCAGCGTCTTGCATTACAATGTACTGCAGGTCATAAATTGTCAGTCAGGGTCCCTACCAAACCACTGTTGGAAAAAAGTGGTAGAAATGCCACCAAATATAAAGTGAGATGGAGAAATCTGCAGCAATGTCAGA…	ALA	notfound	notfound	notfound	notfound	notfound	notfound	GLY/ASP	LEU	notfound	notfound	LEU	notfound	notfound	notfound	12	Oranjeboom brewery, Rotterdam, Netherlands	AEB	Beer
AQT	no	> AQT_YDL227C_HO chromosome4:46271-48031 - 692 ATGCTTTCTGAAAACACGACTATTCTGATGGCTAACGGTGAAATTAAAGACATCGCAAACGTCACGGCTAACTCTTACGTTATGTGCGCAGATGGCTCCGCTGCCCGCGTCATAAATGTCACACAGGGCTATCAGAAAATCTATAATATACAGCAAAAAACCAAACACAGAGCTTTTGAAGGTGAACCTGGTAGGTTAGATCCCAGGCGTAGAACAGTTTATCAGCGTCTTGCATTACAATGTACTGCAGGTCATAAATTGTCAGTCAGGGTCCCTACCAAACCACTGTTGGAAAAAAGTGGTAGAAATGCCACCAAATATAAAGTGAGATGGAGAAATCTGCAGCAATGTC…	AQT_YDL227C_HO chromosome4:46271-48031 - 692ATGCTTTCTGAAAACACGACTATTCTGATGGCTAACGGTGAAATTAAAGACATCGCAAACGTCACGGCTAACTCTTACGTTATGTGCGCAGATGGCTCCGCTGCCCGCGTCATAAATGTCACACAGGGCTATCAGAAAATCTATAATATACAGCAAAAAACCAAACACAGAGCTTTTGAAGGTGAACCTGGTAGGTTAGATCCCAGGCGTAGAACAGTTTATCAGCGTCTTGCATTACAATGTACTGCAGGTCATAAATTGTCAGTCAGGGTCCCTACCAAACCACTGTTGGAAAAAAGTGGTAGAAATGCCACCAAATATAAAGTGAGATGGAGAAATCTGCAGCAATGTCAGA…	ALA	notfound	notfound	notfound	notfound	notfound	notfound	GLY/ASP	LEU	notfound	notfound	LEU	notfound	notfound	notfound	12	Belgium	AQT	Beer
ASH	no	> ASH_YDL227C_HO chromosome4:46271-48031 - 692 ATGCTTTCTGAAAACACGACTATTCTGATGGCTAACGGTGAAATTAAAGACATCGCAAACGTCACGGCTAACTCTTACGTTATGTGCGCAGATGGCTCCGCTGCCCGCGTCATAAATGTCACACAGGGCTATCAGAAAATCTATAATATACAGCAAAAAACCAAACACAGAGCTTTTGAAGGTGAACCTGGTAGGTTAGATCCCAGGCGTAGAACAGTTTATCAGCGTCTTGCATTACAATGTACTGCAGGTCATAAATTGTCAGTCAGGGTCCCTACCAAACCACTGTTGGAAAAAAGTGGTAGAAATGCCACCAAATATAAAGTGAGATGGAGAAATCTGCAGCAATGTC…	ASH_YDL227C_HO chromosome4:46271-48031 - 692ATGCTTTCTGAAAACACGACTATTCTGATGGCTAACGGTGAAATTAAAGACATCGCAAACGTCACGGCTAACTCTTACGTTATGTGCGCAGATGGCTCCGCTGCCCGCGTCATAAATGTCACACAGGGCTATCAGAAAATCTATAATATACAGCAAAAAACCAAACACAGAGCTTTTGAAGGTGAACCTGGTAGGTTAGATCCCAGGCGTAGAACAGTTTATCAGCGTCTTGCATTACAATGTACTGCAGGTCATAAATTGTCAGTCAGGGTCCCTACCAAACCACTGTTGGAAAAAAGTGGTAGAAATGCCACCAAATATAAAGTGAGATGGAGAAATCTGCAGCAATGTCAGA…	ALA	notfound	notfound	notfound	notfound	notfound	notfound	GLY/ASP	LEU	notfound	notfound	LEU	notfound	notfound	notfound	12	Netherlands	ASH	Beer
BSI	no	> BSI_YDL227C_HO chromosome4:46271-48031 - 692 ATGCTTTCTGAAAACACGACTATTCTGATGGCTAACGGTGAAATTAAAGACATCGCAAACGTCACGGCTAACTCTTACGTTATGTGCGCAGATGGCTCCGCTGCCCGCGTCATAAATGTCACACAGGGCTATCAGAAAATCTATAATATACAGCAAAAAACCAAACACAGAGCTTTTGAAGGTGAACCTGGTAGGTTAGATCCCAGGCGTAGAACAGTTTATCAGCGTCTTGCATTACAATGTACTGCAGGTCATAAATTGTCAGTCAGGGTCCCTACCAAACCACTGTTGGAAAAAAGTGGTAGAAATGCCACCAAATATAAAGTGAGATGGAGAAATCTGCAGCAATGTC…	BSI_YDL227C_HO chromosome4:46271-48031 - 692ATGCTTTCTGAAAACACGACTATTCTGATGGCTAACGGTGAAATTAAAGACATCGCAAACGTCACGGCTAACTCTTACGTTATGTGCGCAGATGGCTCCGCTGCCCGCGTCATAAATGTCACACAGGGCTATCAGAAAATCTATAATATACAGCAAAAAACCAAACACAGAGCTTTTGAAGGTGAACCTGGTAGGTTAGATCCCAGGCGTAGAACAGTTTATCAGCGTCTTGCATTACAATGTACTGCAGGTCATAAATTGTCAGTCAGGGTCCCTACCAAACCACTGTTGGAAAAAAGTGGTAGAAATGCCACCAAATATAAAGTGAGATGGAGAAATCTGCAGCAATGTCAGA…	ALA	notfound	notfound	notfound	notfound	notfound	notfound	GLY/ASP	LEU	notfound	notfound	LEU	notfound	notfound	notfound	12	Belgium	BSI	Beer
CBR	no	> CBR_YDL227C_HO chromosome4:46271-48031 - 692 ATGCTTTCTGAAAACACGACTATTCTGATGGCTAACGGTGAAATTAAAGACATCGCAAACGTCACGGCTAACTCTTACGTTATGTGCGCAGATGGCTCCGCTGCCCGCGTCATAAATGTCACACAGGGCTATCAGAAAATCTATAATATACAGCAAAAAACCAAACACAGAGCTTTTGAAGGTGAACCTGGTAGGTTAGATCCCAGGCGTAGAACAGTTTATCAGCGTCTTGCATTACAATGTACTGCAGGTCATAAATTGTCAGTCAGGGTCCCTACCAAACCACTGTTGGAAAAAAGTGGTAGAAATGCCACCAAATATAAAGTGAGATGGAGAAATCTGCAGCAATGTC…	CBR_YDL227C_HO chromosome4:46271-48031 - 692ATGCTTTCTGAAAACACGACTATTCTGATGGCTAACGGTGAAATTAAAGACATCGCAAACGTCACGGCTAACTCTTACGTTATGTGCGCAGATGGCTCCGCTGCCCGCGTCATAAATGTCACACAGGGCTATCAGAAAATCTATAATATACAGCAAAAAACCAAACACAGAGCTTTTGAAGGTGAACCTGGTAGGTTAGATCCCAGGCGTAGAACAGTTTATCAGCGTCTTGCATTACAATGTACTGCAGGTCATAAATTGTCAGTCAGGGTCCCTACCAAACCACTGTTGGAAAAAAGTGGTAGAAATGCCACCAAATATAAAGTGAGATGGAGAAATCTGCAGCAATGTCAGA…	ALA	notfound	notfound	notfound	notfound	notfound	notfound	GLY/ASP	LEU	notfound	notfound	LEU	notfound	notfound	notfound	12	UK	CBR	Beer
CFG	no	> CFG_YDL227C_HO chromosome4:46271-48031 - 692 ATGCTTTCTGAAAACACGACTATTCTGATGGCTAACGGTGAAATTAAAGACATCGCAAACGTCACGGCTAACTCTTACGTTATGTGCGCAGATGGCTCCGCTGCCCGCGTCATAAATGTCACACAGGGCTATCAGAAAATCTATAATATACAGCAAAAAACCAAACACAGAGCTTTTGAAGGTGAACCTGGTAGGTTAGATCCCAGGCGTAGAACAGTTTATCAGCGTCTTGCATTACAATGTACTGCAGGTCATAAATTGTCAGTCAGGGTCCCTACCAAACCACTGTTGGAAAAAAGTGGTAGAAATGCCACCAAATATAAAGTGAGATGGAGAAATCTGCAGCAATGTC…	CFG_YDL227C_HO chromosome4:46271-48031 - 692ATGCTTTCTGAAAACACGACTATTCTGATGGCTAACGGTGAAATTAAAGACATCGCAAACGTCACGGCTAACTCTTACGTTATGTGCGCAGATGGCTCCGCTGCCCGCGTCATAAATGTCACACAGGGCTATCAGAAAATCTATAATATACAGCAAAAAACCAAACACAGAGCTTTTGAAGGTGAACCTGGTAGGTTAGATCCCAGGCGTAGAACAGTTTATCAGCGTCTTGCATTACAATGTACTGCAGGTCATAAATTGTCAGTCAGGGTCCCTACCAAACCACTGTTGGAAAAAAGTGGTAGAAATGCCACCAAATATAAAGTGAGATGGAGAAATCTGCAGCAATGTCAGA…	ALA	notfound	notfound	notfound	notfound	notfound	notfound	GLY/ASP	LEU	notfound	notfound	LEU	notfound	notfound	notfound	12	UK	CFG	Beer
CGC	no	> CGC_YDL227C_HO chromosome4:46271-48031 - 692 ATGCTTTCTGAAAACACGACTATTCTGATGGCTAACGGTGAAATTAAAGACATCGCAAACGTCACGGCTAACTCTTACGTTATGTGCGCAGATGGCTCCGCTGCCCGCGTCATAAATGTCACACAGGGCTATCAGAAAATCTATAATATACAGCAAAAAACCAAACACAGAGCTTTTGAAGGTGAACCTGGTAGGTTAGATCCCAGGCGTAGAACAGTTTATCAGCGTCTTGCATTACAATGTACTGCAGGTCATAAATTGTCAGTCAGGGTCCCTACCAAACCACTGTTGGAAAAAAGTGGTAGAAATGCCACCAAATATAAAGTGAGATGGAGAAATCTGCAGCAATGTC…	CGC_YDL227C_HO chromosome4:46271-48031 - 692ATGCTTTCTGAAAACACGACTATTCTGATGGCTAACGGTGAAATTAAAGACATCGCAAACGTCACGGCTAACTCTTACGTTATGTGCGCAGATGGCTCCGCTGCCCGCGTCATAAATGTCACACAGGGCTATCAGAAAATCTATAATATACAGCAAAAAACCAAACACAGAGCTTTTGAAGGTGAACCTGGTAGGTTAGATCCCAGGCGTAGAACAGTTTATCAGCGTCTTGCATTACAATGTACTGCAGGTCATAAATTGTCAGTCAGGGTCCCTACCAAACCACTGTTGGAAAAAAGTGGTAGAAATGCCACCAAATATAAAGTGAGATGGAGAAATCTGCAGCAATGTCAGA…	ALA	notfound	notfound	notfound	notfound	notfound	notfound	GLY/ASP	LEU	notfound	notfound	LEU	notfound	notfound	notfound	12	Davis, CA, UCD	CGC	Fruit
CMG	no	> CMG_YDL227C_HO chromosome4:46271-48031 - 692 ATGCTTTCTGAAAACACGAYTATTCTGATGGCTAACGGTGAAATTAAAGACATCGCAAACGTCACGGCTAACTCTTACGTTATGTGCGCAGATGGCTCCGCTGCCCGCGTCATAAATGTCACACAGGGCTATCAGAAAATCTATAATATACAGCAAAAAACCAAACACAGAGCTTTTGAAGGTGAACCTGGTAGGTTAGATCCCAGGCGTAGAACAGTTTATCAGCGTCTTGCATTACAATGTACTGCAGGTCATAAATTGTCAGTCAGGGTCCCTACCAAACCACTGTTGGAAAAAAGTGGTAGAAATGCCACCAAATATAAAGTGAGATGGAGAAATCTGCAGCAATGTC…	CMG_YDL227C_HO chromosome4:46271-48031 - 692ATGCTTTCTGAAAACACGAYTATTCTGATGGCTAACGGTGAAATTAAAGACATCGCAAACGTCACGGCTAACTCTTACGTTATGTGCGCAGATGGCTCCGCTGCCCGCGTCATAAATGTCACACAGGGCTATCAGAAAATCTATAATATACAGCAAAAAACCAAACACAGAGCTTTTGAAGGTGAACCTGGTAGGTTAGATCCCAGGCGTAGAACAGTTTATCAGCGTCTTGCATTACAATGTACTGCAGGTCATAAATTGTCAGTCAGGGTCCCTACCAAACCACTGTTGGAAAAAAGTGGTAGAAATGCCACCAAATATAAAGTGAGATGGAGAAATCTGCAGCAATGTCAGA…	ALA	notfound	notfound	notfound	notfound	notfound	notfound	GLY/ASP	LEU	notfound	notfound	LEU	notfound	notfound	notfound	12	Japan	CMG	Sake
AEV	no	> AEV_YDL227C_HO chromosome4:46271-48031 - 692 ATGCTTTCTGAAAACACGACTATTCTGATGGCTAACGGTGAAATTAAAGACATCGCAAACGTCACGGCTAACTCTTACGTTATGTGCGCAGATGGCTCCGCTGCCCGCGTCATAAATGTCACACAGGGCTATCAGAAAATCTATAATATACAGCAAAAAACCAAACACAGAGCTTTTGAAGGTGAACCTGGTAGGTTAGATCCCAGGCGTAGAACAGTTTATCAGCGTCTTGCATTACAATGTACTGCAGGTCATAAATTGTCAGTCAGGGTCCCTACCAAACCACTGTTGGAAAAAAGTGGTAGAAATGCCACCAAATATAAAGTGAGATGGAGAAATCTGCAGCAATGTC…	AEV_YDL227C_HO chromosome4:46271-48031 - 692ATGCTTTCTGAAAACACGACTATTCTGATGGCTAACGGTGAAATTAAAGACATCGCAAACGTCACGGCTAACTCTTACGTTATGTGCGCAGATGGCTCCGCTGCCCGCGTCATAAATGTCACACAGGGCTATCAGAAAATCTATAATATACAGCAAAAAACCAAACACAGAGCTTTTGAAGGTGAACCTGGTAGGTTAGATCCCAGGCGTAGAACAGTTTATCAGCGTCTTGCATTACAATGTACTGCAGGTCATAAATTGTCAGTCAGGGTCCCTACCAAACCACTGTTGGAAAAAAGTGGTAGAAATGCCACCAAATATAAAGTGAGATGGAGAAATCTGCAGCAATGTCAGA…	ALA	notfound	notfound	notfound	notfound	notfound	notfound	GLY/ASP	LEU	notfound	notfound	LEU	notfound	notfound	notfound	12	Rotterdam, Netherlands	AEV	Water
ALN	no	> ALN_YDL227C_HO chromosome4:46271-48031 - 692 ATGCTTTCTGAAAACACGACTATTCTGATGGCTAACGGTGAAATTAAAGACATCGCAAACGTCACGGCTAACTCTTACGTTATGTGCGCAGATGGCTCCGCTGCCCGCGTCATAAATGTCACACAGGGCTATCAGAAAATCTATAATATACAGCAAAAAACCAAACACAGAGCTTTTGAAGGTGAACCTGGTAGGTTAGATCCCAGGCGTAGAACAGTTTATCAGCGTCTTGCATTACAATGTACTGCAGGTCATAAATTGTCAGTCAGGGTCCCTACCAAACCACTGTTGGAAAAAAGTGGTAGAAATGCCACCAAATATAAAGTGAGATGGAGAAATCTGCAGCAATGTC…	ALN_YDL227C_HO chromosome4:46271-48031 - 692ATGCTTTCTGAAAACACGACTATTCTGATGGCTAACGGTGAAATTAAAGACATCGCAAACGTCACGGCTAACTCTTACGTTATGTGCGCAGATGGCTCCGCTGCCCGCGTCATAAATGTCACACAGGGCTATCAGAAAATCTATAATATACAGCAAAAAACCAAACACAGAGCTTTTGAAGGTGAACCTGGTAGGTTAGATCCCAGGCGTAGAACAGTTTATCAGCGTCTTGCATTACAATGTACTGCAGGTCATAAATTGTCAGTCAGGGTCCCTACCAAACCACTGTTGGAAAAAAGTGGTAGAAATGCCACCAAATATAAAGTGAGATGGAGAAATCTGCAGCAATGTCAGA…	ALA	notfound	notfound	notfound	notfound	notfound	notfound	GLY/ASP	LEU	notfound	notfound	LEU	notfound	notfound	notfound	12	Bratislava, Deninska Nova Ves, Slovakia	ALN	Water
BBG	no	> BBG_YDL227C_HO chromosome4:46271-48031 - 692 ATGCTTTCTGAAAACACGACTATTCTGATGGCTAACGGTGAAATTAAAGACATCGCAAACGTCACGGCTAACTCTTACGTTATGTGCGCAGATGGCTCCGCTGCCCGCGTCATAAATGTCACACAGGGCTATCAGAAAATCTATAATATACAGCAAAAAACCAAACACAGAGCTTTTGAAGGTGAACCTGGTAGGTTAGATCCCAGGCGTAGAACAGTTTATCAGCGTCTTGCATTACAATGTACTGCAGGTCATAAATTGTCAGTCAGGGTCCCTACCAAACCACTGTTGGAAAAAAGTGGTAGAAATGCCACCAAATATAAAGTGAGATGGAGAAATCTGCAGCAATGTC…	BBG_YDL227C_HO chromosome4:46271-48031 - 692ATGCTTTCTGAAAACACGACTATTCTGATGGCTAACGGTGAAATTAAAGACATCGCAAACGTCACGGCTAACTCTTACGTTATGTGCGCAGATGGCTCCGCTGCCCGCGTCATAAATGTCACACAGGGCTATCAGAAAATCTATAATATACAGCAAAAAACCAAACACAGAGCTTTTGAAGGTGAACCTGGTAGGTTAGATCCCAGGCGTAGAACAGTTTATCAGCGTCTTGCATTACAATGTACTGCAGGTCATAAATTGTCAGTCAGGGTCCCTACCAAACCACTGTTGGAAAAAAGTGGTAGAAATGCCACCAAATATAAAGTGAGATGGAGAAATCTGCAGCAATGTCAGA…	ALA	notfound	notfound	notfound	notfound	notfound	notfound	GLY/ASP	LEU	notfound	notfound	LEU	notfound	notfound	notfound	12	Devinska Nova Ves, Slovakia	BBG	Water
BRP	no	> BRP_YDL227C_HO chromosome4:46271-48031 - 692 ATGCTTTCTGAAAACACGACTATTCTGATGGCTAACGGTGAAATTAAAGACATCGCAAACGTCACGGCTAACTCTTACGTTATGTGCGCAGATGGCTCCGCTGCCCGCGTCATAAATGTCACACAGGGCTATCAGAAAATCTATAATATACAGCAAAAAACCAAACACAGAGCTTTTGAAGGTGAACCTGGTAGGTTAGATCCCAGGCGTAGAACAGTTTATCAGCGTCTTGCATTACAATGTACTGCAGGTCATAAATTGTCAGTCAGGGTCCCTACCAAACCACTGTTGGAAAAAAGTGGTAGAAATGCCACCAAATATAAAGTGAGATGGAGAAATCTGCAGCAATGTC…	BRP_YDL227C_HO chromosome4:46271-48031 - 692ATGCTTTCTGAAAACACGACTATTCTGATGGCTAACGGTGAAATTAAAGACATCGCAAACGTCACGGCTAACTCTTACGTTATGTGCGCAGATGGCTCCGCTGCCCGCGTCATAAATGTCACACAGGGCTATCAGAAAATCTATAATATACAGCAAAAAACCAAACACAGAGCTTTTGAAGGTGAACCTGGTAGGTTAGATCCCAGGCGTAGAACAGTTTATCAGCGTCTTGCATTACAATGTACTGCAGGTCATAAATTGTCAGTCAGGGTCCCTACCAAACCACTGTTGGAAAAAAGTGGTAGAAATGCCACCAAATATAAAGTGAGATGGAGAAATCTGCAGCAATGTCAGA…	ALA	notfound	notfound	notfound	notfound	notfound	notfound	notfound	LEU	notfound	notfound	LEU	notfound	notfound	notfound	13	Belgium	BRP	Beer
BHB	no	> BHB_YDL227C_HO chromosome4:46271-48031 - 692 ATGCTTTCTGAAAACACGACTATTCTGATGGCTAACGGTGAAATTAAAGACATCGCAAACGTCACGGCTAACTCTTACGTTATGTGCGCAGATGGCTCCGCTGCCCGCGTCATAAATGTCACACAGGGCTATCAGAAAATCTATAATATACAGCAAAAAACCAAACACAGAGCTTTTGAAGGTGAACCTGGTAGGTTAGATCCCAGGCGTAGAACAGTTTATCAGCGTCTTGCATTACAATGTACTGCAGGTCATAAATTGTCAGTCAGGGTCCCTACCAAACCACTGTTGGAAAAAAGTGGTAGAAATGCCACCAAATATAAAGTGAGATGGAGAAATCTGCAGCAATGTC…	BHB_YDL227C_HO chromosome4:46271-48031 - 692ATGCTTTCTGAAAACACGACTATTCTGATGGCTAACGGTGAAATTAAAGACATCGCAAACGTCACGGCTAACTCTTACGTTATGTGCGCAGATGGCTCCGCTGCCCGCGTCATAAATGTCACACAGGGCTATCAGAAAATCTATAATATACAGCAAAAAACCAAACACAGAGCTTTTGAAGGTGAACCTGGTAGGTTAGATCCCAGGCGTAGAACAGTTTATCAGCGTCTTGCATTACAATGTACTGCAGGTCATAAATTGTCAGTCAGGGTCCCTACCAAACCACTGTTGGAAAAAAGTGGTAGAAATGCCACCAAATATAAAGTGAGATGGAGAAATCTGCAGCAATGTCAGA…	ALA	notfound	notfound	notfound	notfound	SER	notfound	notfound	notfound	SER	notfound	LEU	notfound	notfound	notfound	14	Australia	BHB	Bakery
AQG	no	> AQG_YDL227C_HO chromosome4:46271-48031 - 692 ATGCTTTCTGAAAACACGACTATTCTGATGGCTAACGGTGAAATTAAAGACATCGCAAACGTCACGGCTAACTCTTACGTTATGTGCGCAGATGGCTCCGCTGCCCGCGTCATAAATGTCACACAGGGCTATCAGAAAATCTATAATATACAGCAAAAAACCAAACACAGAGCTTTTGAAGGTGAACCTGGTAGGTTAGATCCCAGGCGTAGAACAGTTTATCAGCGTCTTGCATTACAATGTACTGCAGGTCATAAATTGTCAGTCAGGGTCCCTACCAAACCACTGTTGGAAAAAAGTGGTAGAAATGCCACCAAATATAAAGTGAGATGGAGAAATCTGCAGCAATGTC…	AQG_YDL227C_HO chromosome4:46271-48031 - 692ATGCTTTCTGAAAACACGACTATTCTGATGGCTAACGGTGAAATTAAAGACATCGCAAACGTCACGGCTAACTCTTACGTTATGTGCGCAGATGGCTCCGCTGCCCGCGTCATAAATGTCACACAGGGCTATCAGAAAATCTATAATATACAGCAAAAAACCAAACACAGAGCTTTTGAAGGTGAACCTGGTAGGTTAGATCCCAGGCGTAGAACAGTTTATCAGCGTCTTGCATTACAATGTACTGCAGGTCATAAATTGTCAGTCAGGGTCCCTACCAAACCACTGTTGGAAAAAAGTGGTAGAAATGCCACCAAATATAAAGTGAGATGGAGAAATCTGCAGCAATGTCAGA…	ALA	notfound	notfound	notfound	notfound	SER	notfound	notfound	notfound	SER	notfound	LEU	notfound	notfound	notfound	14	Plovdiv, Bulgaria	AQG	Beer
CNE	no	> CNE_YDL227C_HO chromosome4:46271-48031 - 692 ATGCTTTCTGAAAACACGACTATTCTGATGGCTAACGGTGAAATTAAAGACATCGCAAACGTCACGGCTAACTCTTACGTTATGTGCGCAGATGGCTCCGCTGCCCGCGTCATAAATGTCACACAGGGCTATCAGAAAATCTATAATATACAGCAAAAAACCAAACACAGAGCTTTTGAAGGTGAACCTGGTAGGTTAGATCCCAGGCGTAGAACAGTTTATCAGCGTCTTGCATTACAATGTACTGCAGGTCATAAATTGTCAGTCAGGGTCCCTACCAAACCACTGTTGGAAAAAAGTGGTAGAAATGCCACCAAATATAAAGTGAGATGGAGAAATCTGCAGCAATGTC…	CNE_YDL227C_HO chromosome4:46271-48031 - 692ATGCTTTCTGAAAACACGACTATTCTGATGGCTAACGGTGAAATTAAAGACATCGCAAACGTCACGGCTAACTCTTACGTTATGTGCGCAGATGGCTCCGCTGCCCGCGTCATAAATGTCACACAGGGCTATCAGAAAATCTATAATATACAGCAAAAAACCAAACACAGAGCTTTTGAAGGTGAACCTGGTAGGTTAGATCCCAGGCGTAGAACAGTTTATCAGCGTCTTGCATTACAATGTACTGCAGGTCATAAATTGTCAGTCAGGGTCCCTACCAAACCACTGTTGGAAAAAAGTGGTAGAAATGCCACCAAATATAAAGTGAGATGGAGAAATCTGCAGCAATGTCAGA…	ALA	notfound	notfound	notfound	notfound	SER	notfound	notfound	notfound	SER	notfound	LEU	notfound	notfound	notfound	14	Brazil	CNE	Bioethanol
CIG	no	> CIG_YDL227C_HO chromosome4:46271-48031 - 692 ATGCTTTCTGAAAACACGACTATTCTGATGGCTAACGGTGAAATTAAAGACATCGCAAACGTCACGGCTAACTCTTACGTTATGTGCGCAGATGGCTCCGCTGCCCGCGTCATAAATGTCACACAGGGCTATCAGAAAATCTATAATATACAGCAAAAAACCAAACACAGAGCTTTTGAAGGTGAACCTGGTAGGTTAGATCCCAGGCGTAGAACAGTTTATCAGCGTCTTGCATTACAATGTACTGCAGGTCATAAATTGTCAGTCAGGGTCCCTACCAAACCACTGTTGGAAAAAAGTGGTAGAAATGCCACCAAATATAAAGTGAGATGGAGAAATCTGCAGCAATGTC…	CIG_YDL227C_HO chromosome4:46271-48031 - 692ATGCTTTCTGAAAACACGACTATTCTGATGGCTAACGGTGAAATTAAAGACATCGCAAACGTCACGGCTAACTCTTACGTTATGTGCGCAGATGGCTCCGCTGCCCGCGTCATAAATGTCACACAGGGCTATCAGAAAATCTATAATATACAGCAAAAAACCAAACACAGAGCTTTTGAAGGTGAACCTGGTAGGTTAGATCCCAGGCGTAGAACAGTTTATCAGCGTCTTGCATTACAATGTACTGCAGGTCATAAATTGTCAGTCAGGGTCCCTACCAAACCACTGTTGGAAAAAAGTGGTAGAAATGCCACCAAATATAAAGTGAGATGGAGAAATCTGCAGCAATGTCAGA…	ALA	notfound	notfound	notfound	notfound	SER	notfound	notfound	notfound	SER	notfound	LEU	notfound	notfound	notfound	14	Netherlands	CIG	Human, clinical
CIH	no	> CIH_YDL227C_HO chromosome4:46271-48031 - 692 ATGCTTTCTGAAAACACGACTATTCTGATGGCTAACGGTGAAATTAAAGACATCGCAAACGTCACGGCTAACTCTTACGTTATGTGCGCAGATGGCTCCGCTGCCCGCGTCATAAATGTCACACAGGGCTATCAGAAAATCTATAATATACAGCAAAAAACCAAACACAGAGCTTTTGAAGGTGAACCTGGTAGGTTAGATCCCAGGCGTAGAACAGTTTATCAGCGTCTTGCATTACAATGTACTGCAGGTCATAAATTGTCAGTCAGGGTCCCTACCAAACCACTGTTGGAAAAAAGTGGTAGAAATGCCACCAAATATAAAGTGAGATGGAGAAATCTGCAGCAATGTC…	CIH_YDL227C_HO chromosome4:46271-48031 - 692ATGCTTTCTGAAAACACGACTATTCTGATGGCTAACGGTGAAATTAAAGACATCGCAAACGTCACGGCTAACTCTTACGTTATGTGCGCAGATGGCTCCGCTGCCCGCGTCATAAATGTCACACAGGGCTATCAGAAAATCTATAATATACAGCAAAAAACCAAACACAGAGCTTTTGAAGGTGAACCTGGTAGGTTAGATCCCAGGCGTAGAACAGTTTATCAGCGTCTTGCATTACAATGTACTGCAGGTCATAAATTGTCAGTCAGGGTCCCTACCAAACCACTGTTGGAAAAAAGTGGTAGAAATGCCACCAAATATAAAGTGAGATGGAGAAATCTGCAGCAATGTCAGA…	ALA	notfound	notfound	notfound	notfound	SER	notfound	notfound	notfound	SER	notfound	LEU	notfound	notfound	notfound	14	Netherlands	CIH	Human, clinical
CIL	no	> CIL_YDL227C_HO chromosome4:46271-48031 - 692 ATGCTTTCTGAAAACACGACTATTCTGATGGCTAACGGTGAAATTAAAGACATCGCAAACGTCACGGCTAACTCTTACGTTATGTGCGCAGATGGCTCCGCTGCCCGCGTCATAAATGTCACACAGGGCTATCAGAAAATCTATAATATACAGCAAAAAACCAAACACAGAGCTTTTGAAGGTGAACCTGGTAGGTTAGATCCCAGGCGTAGAACAGTTTATCAGCGTCTTGCATTACAATGTACTGCAGGTCATAAATTGTCAGTCAGGGTCCCTACCAAACCACTGTTGGAAAAAAGTGGTAGAAATGCCACCAAATATAAAGTGAGATGGAGAAATCTGCAGCAATGTC…	CIL_YDL227C_HO chromosome4:46271-48031 - 692ATGCTTTCTGAAAACACGACTATTCTGATGGCTAACGGTGAAATTAAAGACATCGCAAACGTCACGGCTAACTCTTACGTTATGTGCGCAGATGGCTCCGCTGCCCGCGTCATAAATGTCACACAGGGCTATCAGAAAATCTATAATATACAGCAAAAAACCAAACACAGAGCTTTTGAAGGTGAACCTGGTAGGTTAGATCCCAGGCGTAGAACAGTTTATCAGCGTCTTGCATTACAATGTACTGCAGGTCATAAATTGTCAGTCAGGGTCCCTACCAAACCACTGTTGGAAAAAAGTGGTAGAAATGCCACCAAATATAAAGTGAGATGGAGAAATCTGCAGCAATGTCAGA…	ALA	notfound	notfound	notfound	notfound	SER	notfound	notfound	notfound	SER	notfound	LEU	notfound	notfound	notfound	14	Netherlands	CIL	Human, clinical
SACE_YBW	no	> SACE_YBW_YDL227C_HO chromosome4:46271-48031 - 692 ATGCTTTCTGAAAACACGACTATTCTGATGGCTAACGGTGAAATTAAAGACATCGCAAACGTCACGGCTAACTCTTACGTTATGTGCGCAGATGGCTCCGCTGCCCGCGTCATAAATGTCACACAGGGCTATCAGAAAATCTATAATATACAGCAAAAAACCAAACACAGAGCTTTTGAAGGTGAACCTGGTAGGTTAGATCCCAGGCGTAGAACAGTTTATCAGCGTCTTGCATTACAATGTACTGCAGGTCATAAATTGTCAGTCAGGGTCCCTACCAAACCACTGTTGGAAAAAAGTGGTAGAAATGCCACCAAATATAAAGTGAGATGGAGAAATCTGCAGCA…	SACE_YBW_YDL227C_HO chromosome4:46271-48031 - 692ATGCTTTCTGAAAACACGACTATTCTGATGGCTAACGGTGAAATTAAAGACATCGCAAACGTCACGGCTAACTCTTACGTTATGTGCGCAGATGGCTCCGCTGCCCGCGTCATAAATGTCACACAGGGCTATCAGAAAATCTATAATATACAGCAAAAAACCAAACACAGAGCTTTTGAAGGTGAACCTGGTAGGTTAGATCCCAGGCGTAGAACAGTTTATCAGCGTCTTGCATTACAATGTACTGCAGGTCATAAATTGTCAGTCAGGGTCCCTACCAAACCACTGTTGGAAAAAAGTGGTAGAAATGCCACCAAATATAAAGTGAGATGGAGAAATCTGCAGCAATG…	ALA	notfound	notfound	notfound	notfound	SER	notfound	notfound	notfound	SER	notfound	LEU	notfound	notfound	notfound	14	Minnesota, USA	SACE_YBW	Human, clinical
CBK	no	> CBK_YDL227C_HO chromosome4:46271-48031 - 692 ATGCTTTCTGAAAACACGACTATTCTGATGGCTAACGGTGAAATTAAAGACATCGCAAACGTCACGGCTAACTCTTACGTTATGTGCGCAGATGGCTCCGCTGCCCGCGTCATAAATGTCACACAGGGCTATCAGAAAATCTATAATATACAGCAAAAAACCAAACACAGAGCTTTTGAAGGTGAACCTGGTAGGTTAGATCCCAGGCGTAGAACAGTTTATCAGCGTCTTGCATTACAATGTACTGCAGGTCATAAATTGTCAGTCAGGGTCCCTACCAAACCACTGTTGGAAAAAAGTGGTAGAAATGCCACCAAATATAAAGTGAGATGGAGAAATCTGCAGCAATGTC…	CBK_YDL227C_HO chromosome4:46271-48031 - 692ATGCTTTCTGAAAACACGACTATTCTGATGGCTAACGGTGAAATTAAAGACATCGCAAACGTCACGGCTAACTCTTACGTTATGTGCGCAGATGGCTCCGCTGCCCGCGTCATAAATGTCACACAGGGCTATCAGAAAATCTATAATATACAGCAAAAAACCAAACACAGAGCTTTTGAAGGTGAACCTGGTAGGTTAGATCCCAGGCGTAGAACAGTTTATCAGCGTCTTGCATTACAATGTACTGCAGGTCATAAATTGTCAGTCAGGGTCCCTACCAAACCACTGTTGGAAAAAAGTGGTAGAAATGCCACCAAATATAAAGTGAGATGGAGAAATCTGCAGCAATGTCAGA…	ALA	notfound	notfound	notfound	notfound	SER	notfound	notfound	notfound	SER	notfound	LEU	notfound	notfound	notfound	14	Schleswig-Holstein	CBK	Insect
SACE_MAL	no	> SACE_MAL_YDL227C_HO chromosome4:46271-48031 - 692 ATGCTTTCTGAAAACACGACTGTTCTGATGGCTAACGGTGAAATTAAAGACATCGCAAACGTCACGGCTAACTCTTACGTTATGTGCGCAGATGGCTCCGCTGCCCGCGTCATAAATGTCACACAGGGCTATCAGAAAATCTATAATATACAGCAAAAAACCAAACACAGAGCTTTTGAAGGTGAACCTGGTAGGTTAGATCCCAGGCGTAGAACAGTTTATCAGCGTCTTGCATTACAATGTACTGCAGGTCATAAATTGTCAGTCAGGGTCCCTACCAAACCACTGTTGGAAAAAAGTGGTAGAAATGCCACCAAATATAAAGTGAGATGGAGAAATCTGCAGCA…	SACE_MAL_YDL227C_HO chromosome4:46271-48031 - 692ATGCTTTCTGAAAACACGACTGTTCTGATGGCTAACGGTGAAATTAAAGACATCGCAAACGTCACGGCTAACTCTTACGTTATGTGCGCAGATGGCTCCGCTGCCCGCGTCATAAATGTCACACAGGGCTATCAGAAAATCTATAATATACAGCAAAAAACCAAACACAGAGCTTTTGAAGGTGAACCTGGTAGGTTAGATCCCAGGCGTAGAACAGTTTATCAGCGTCTTGCATTACAATGTACTGCAGGTCATAAATTGTCAGTCAGGGTCCCTACCAAACCACTGTTGGAAAAAAGTGGTAGAAATGCCACCAAATATAAAGTGAGATGGAGAAATCTGCAGCAATG…	ALA	notfound	notfound	notfound	notfound	SER	notfound	notfound	notfound	SER	notfound	LEU	notfound	notfound	notfound	14	Telok Senangin, Malaysia	SACE_MAL	Insect
SACE_GAV	no	> SACE_GAV_YDL227C_HO chromosome4:46271-48031 - 692 ATGCTTTCTGAAAACACGACTATTCTGATGGCTAACGGTGAAATTAAAGACATCGCAAACGTCACGGCTAACTCTTACGTTATGTGCGCAGATGGCTCCGCTGCCCGCGTCATAAATGTCACACAGGGCTATCAGAAAATCTATAATATACAGCAAAAAACCAAACACAGAGCTTTTGAAGGTGAACCTGGTAGGTTAGATCCCAGGCGTAGAACAGTTTATCAGCGTCTTGCATTACAATGTACTGCAGGTCATAAATTGTCAGTCAGGGTCCCTACCAAACCACTGTTGGAAAAAAGTGGTAGAAATGCCACCAAATATAAAGTGAGATGGAGAAATCTGCAGCA…	SACE_GAV_YDL227C_HO chromosome4:46271-48031 - 692ATGCTTTCTGAAAACACGACTATTCTGATGGCTAACGGTGAAATTAAAGACATCGCAAACGTCACGGCTAACTCTTACGTTATGTGCGCAGATGGCTCCGCTGCCCGCGTCATAAATGTCACACAGGGCTATCAGAAAATCTATAATATACAGCAAAAAACCAAACACAGAGCTTTTGAAGGTGAACCTGGTAGGTTAGATCCCAGGCGTAGAACAGTTTATCAGCGTCTTGCATTACAATGTACTGCAGGTCATAAATTGTCAGTCAGGGTCCCTACCAAACCACTGTTGGAAAAAAGTGGTAGAAATGCCACCAAATATAAAGTGAGATGGAGAAATCTGCAGCAATG…	ALA	notfound	notfound	notfound	notfound	SER	notfound	notfound	notfound	SER	notfound	LEU	notfound	notfound	notfound	14	NA	SACE_GAV	Lab strain
BCV	no	> BCV_YDL227C_HO chromosome4:46271-48031 - 692 ATGCTTTCTGAAAACACGACTATTCTGATGGCTAACGGTGAAATTAAAGACATCGCAAACGTCACGGCTAACTCTTACGTTATGTGCGCAGATGGCTCCGCTGCCCGCGTCATAAATGTCACACAGGGCTATCAGAAAATCTATAATATACAGCAAAAAACCAAACACAGAGCTTTTGAAGGTGAACCTGGTAGGTTAGATCCCAGGCGTAGAACAGTTTATCAGCGTCTTGCATTACAATGTACTGCAGGTCATAAATTGTCAGTCAGGGTCCCTACCAAACCACTGTTGGAAAAAAGTGGTAGAAATGCCACCAAATATAAAGTGAGATGGAGAAATCTGCAGCAATGTC…	BCV_YDL227C_HO chromosome4:46271-48031 - 692ATGCTTTCTGAAAACACGACTATTCTGATGGCTAACGGTGAAATTAAAGACATCGCAAACGTCACGGCTAACTCTTACGTTATGTGCGCAGATGGCTCCGCTGCCCGCGTCATAAATGTCACACAGGGCTATCAGAAAATCTATAATATACAGCAAAAAACCAAACACAGAGCTTTTGAAGGTGAACCTGGTAGGTTAGATCCCAGGCGTAGAACAGTTTATCAGCGTCTTGCATTACAATGTACTGCAGGTCATAAATTGTCAGTCAGGGTCCCTACCAAACCACTGTTGGAAAAAAGTGGTAGAAATGCCACCAAATATAAAGTGAGATGGAGAAATCTGCAGCAATGTCAGA…	ALA	notfound	notfound	notfound	notfound	SER	notfound	notfound	notfound	SER	notfound	LEU	notfound	notfound	notfound	14	Israel	BCV	Nature
BDA	no	> BDA_YDL227C_HO chromosome4:46271-48031 - 692 ATGCTTTCTGAAAACACGACTATTCTGATGGCTAACGGTGAAATTAAAGACATCGCAAACGTCACGGCTAACTCTTACGTTATGTGCGCAGATGGCTCCGCTGCCCGCGTCATAAATGTCACACAGGGCTATCAGAAAATCTATAATATACAGCAAAAAACCAAACACAGAGCTTTTGAAGGTGAACCTGGTAGGTTAGATCCCAGGCGTAGAACAGTTTATCAGCGTCTTGCATTACAATGTACTGCAGGTCATAAATTGTCAGTCAGGGTCCCTACCAAACCACTGTTGGAAAAAAGTGGTAGAAATGCCACCAAATATAAAGTGAGATGGAGAAATCTGCAGCAATGTC…	BDA_YDL227C_HO chromosome4:46271-48031 - 692ATGCTTTCTGAAAACACGACTATTCTGATGGCTAACGGTGAAATTAAAGACATCGCAAACGTCACGGCTAACTCTTACGTTATGTGCGCAGATGGCTCCGCTGCCCGCGTCATAAATGTCACACAGGGCTATCAGAAAATCTATAATATACAGCAAAAAACCAAACACAGAGCTTTTGAAGGTGAACCTGGTAGGTTAGATCCCAGGCGTAGAACAGTTTATCAGCGTCTTGCATTACAATGTACTGCAGGTCATAAATTGTCAGTCAGGGTCCCTACCAAACCACTGTTGGAAAAAAGTGGTAGAAATGCCACCAAATATAAAGTGAGATGGAGAAATCTGCAGCAATGTCAGA…	ALA	notfound	notfound	notfound	notfound	SER	notfound	notfound	notfound	SER	notfound	LEU	notfound	notfound	notfound	14	Israel	BDA	Nature
BDB	no	> BDB_YDL227C_HO chromosome4:46271-48031 - 692 ATGCTTTCTGAAAACACGACTATTCTGATGGCTAACGGTGAAATTAAAGACATCGCAAACGTCACGGCTAACTCTTACGTTATGTGCGCAGATGGCTCCGCTGCCCGCGTCATAAATGTCACACAGGGCTATCAGAAAATCTATAATATACAGCAAAAAACCAAACACAGAGCTTTTGAAGGTGAACCTGGTAGGTTAGATCCCAGGCGTAGAACAGTTTATCAGCGTCTTGCATTACAATGTACTGCAGGTCATAAATTGTCAGTCAGGGTCCCTACCAAACCACTGTTGGAAAAAAGTGGTAGAAATGCCACCAAATATAAAGTGAGATGGAGAAATCTGCAGCAATGTC…	BDB_YDL227C_HO chromosome4:46271-48031 - 692ATGCTTTCTGAAAACACGACTATTCTGATGGCTAACGGTGAAATTAAAGACATCGCAAACGTCACGGCTAACTCTTACGTTATGTGCGCAGATGGCTCCGCTGCCCGCGTCATAAATGTCACACAGGGCTATCAGAAAATCTATAATATACAGCAAAAAACCAAACACAGAGCTTTTGAAGGTGAACCTGGTAGGTTAGATCCCAGGCGTAGAACAGTTTATCAGCGTCTTGCATTACAATGTACTGCAGGTCATAAATTGTCAGTCAGGGTCCCTACCAAACCACTGTTGGAAAAAAGTGGTAGAAATGCCACCAAATATAAAGTGAGATGGAGAAATCTGCAGCAATGTCAGA…	ALA	notfound	notfound	notfound	notfound	SER	notfound	notfound	notfound	SER	notfound	LEU	notfound	notfound	notfound	14	Israel	BDB	Nature
BDD	no	> BDD_YDL227C_HO chromosome4:46271-48031 - 692 ATGCTTTCTGAAAACACGACTATTCTGATGGCTAACGGTGAAATTAAAGACATCGCAAACGTCACGGCTAACTCTTACGTTATGTGCGCAGATGGCTCCGCTGCCCGCGTCATAAATGTCACACAGGGCTATCAGAAAATCTATAATATACAGCAAAAAACCAAACACAGAGCTTTTGAAGGTGAACCTGGTAGGTTAGATCCCAGGCGTAGAACAGTTTATCAGCGTCTTGCATTACAATGTACTGCAGGTCATAAATTGTCAGTCAGGGTCCCTACCAAACCACTGTTGGAAAAAAGTGGTAGAAATGCCACCAAATATAAAGTGAGATGGAGAAATCTGCAGCAATGTC…	BDD_YDL227C_HO chromosome4:46271-48031 - 692ATGCTTTCTGAAAACACGACTATTCTGATGGCTAACGGTGAAATTAAAGACATCGCAAACGTCACGGCTAACTCTTACGTTATGTGCGCAGATGGCTCCGCTGCCCGCGTCATAAATGTCACACAGGGCTATCAGAAAATCTATAATATACAGCAAAAAACCAAACACAGAGCTTTTGAAGGTGAACCTGGTAGGTTAGATCCCAGGCGTAGAACAGTTTATCAGCGTCTTGCATTACAATGTACTGCAGGTCATAAATTGTCAGTCAGGGTCCCTACCAAACCACTGTTGGAAAAAAGTGGTAGAAATGCCACCAAATATAAAGTGAGATGGAGAAATCTGCAGCAATGTCAGA…	ALA	notfound	notfound	notfound	notfound	SER	notfound	notfound	notfound	SER	notfound	LEU	notfound	notfound	notfound	14	Israel	BDD	Nature
BDE	no	> BDE_YDL227C_HO chromosome4:46271-48031 - 692 ATGCTTTCTGAAAACACGACTATTCTGATGGCTAACGGTGAAATTAAAGACATCGCAAACGTCACGGCTAACTCTTACGTTATGTGCGCAGATGGCTCCGCTGCCCGCGTCATAAATGTCACACAGGGCTATCAGAAAATCTATAATATACAGCAAAAAACCAAACACAGAGCTTTTGAAGGTGAACCTGGTAGGTTAGATCCCAGGCGTAGAACAGTTTATCAGCGTCTTGCATTACAATGTACTGCAGGTCATAAATTGTCAGTCAGGGTCCCTACCAAACCACTGTTGGAAAAAAGTGGTAGAAATGCCACCAAATATAAAGTGAGATGGAGAAATCTGCAGCAATGTC…	BDE_YDL227C_HO chromosome4:46271-48031 - 692ATGCTTTCTGAAAACACGACTATTCTGATGGCTAACGGTGAAATTAAAGACATCGCAAACGTCACGGCTAACTCTTACGTTATGTGCGCAGATGGCTCCGCTGCCCGCGTCATAAATGTCACACAGGGCTATCAGAAAATCTATAATATACAGCAAAAAACCAAACACAGAGCTTTTGAAGGTGAACCTGGTAGGTTAGATCCCAGGCGTAGAACAGTTTATCAGCGTCTTGCATTACAATGTACTGCAGGTCATAAATTGTCAGTCAGGGTCCCTACCAAACCACTGTTGGAAAAAAGTGGTAGAAATGCCACCAAATATAAAGTGAGATGGAGAAATCTGCAGCAATGTCAGA…	ALA	notfound	notfound	notfound	notfound	SER	notfound	notfound	notfound	SER	notfound	LEU	notfound	notfound	notfound	14	Israel	BDE	Nature
BDH	no	> BDH_YDL227C_HO chromosome4:46271-48031 - 692 ATGCTTTCTGAAAACACGACTATTCTGATGGCTAACGGTGAAATTAAAGACATCGCAAACGTCACGGCTAACTCTTACGTTATGTGCGCAGATGGCTCCGCTGCCCGCGTCATAAATGTCACACAGGGCTATCAGAAAATCTATAATATACAGCAAAAAACCAAACACAGAGCTTTTGAAGGTGAACCTGGTAGGTTAGATCCCAGGCGTAGAACAGTTTATCAGCGTCTTGCATTACAATGTACTGCAGGTCATAAATTGTCAGTCAGGGTCCCTACCAAACCACTGTTGGAAAAAAGTGGTAGAAATGCCACCAAATATAAAGTGAGATGGAGAAATCTGCAGCAATGTC…	BDH_YDL227C_HO chromosome4:46271-48031 - 692ATGCTTTCTGAAAACACGACTATTCTGATGGCTAACGGTGAAATTAAAGACATCGCAAACGTCACGGCTAACTCTTACGTTATGTGCGCAGATGGCTCCGCTGCCCGCGTCATAAATGTCACACAGGGCTATCAGAAAATCTATAATATACAGCAAAAAACCAAACACAGAGCTTTTGAAGGTGAACCTGGTAGGTTAGATCCCAGGCGTAGAACAGTTTATCAGCGTCTTGCATTACAATGTACTGCAGGTCATAAATTGTCAGTCAGGGTCCCTACCAAACCACTGTTGGAAAAAAGTGGTAGAAATGCCACCAAATATAAAGTGAGATGGAGAAATCTGCAGCAATGTCAGA…	ALA	notfound	notfound	notfound	notfound	SER	notfound	notfound	notfound	SER	notfound	LEU	notfound	notfound	notfound	14	Israel	BDH	Nature
BDI	no	> BDI_YDL227C_HO chromosome4:46271-48031 - 692 ATGCTTTCTGAAAACACGACTATTCTGATGGCTAACGGTGAAATTAAAGACATCGCAAACGTCACGGCTAACTCTTACGTTATGTGCGCAGATGGCTCCGCTGCCCGCGTCATAAATGTCACACAGGGCTATCAGAAAATCTATAATATACAGCAAAAAACCAAACACAGAGCTTTTGAAGGTGAACCTGGTAGGTTAGATCCCAGGCGTAGAACAGTTTATCAGCGTCTTGCATTACAATGTACTGCAGGTCATAAATTGTCAGTCAGGGTCCCTACCAAACCACTGTTGGAAAAAAGTGGTAGAAATGCCACCAAATATAAAGTGAGATGGAGAAATCTGCAGCAATGTC…	BDI_YDL227C_HO chromosome4:46271-48031 - 692ATGCTTTCTGAAAACACGACTATTCTGATGGCTAACGGTGAAATTAAAGACATCGCAAACGTCACGGCTAACTCTTACGTTATGTGCGCAGATGGCTCCGCTGCCCGCGTCATAAATGTCACACAGGGCTATCAGAAAATCTATAATATACAGCAAAAAACCAAACACAGAGCTTTTGAAGGTGAACCTGGTAGGTTAGATCCCAGGCGTAGAACAGTTTATCAGCGTCTTGCATTACAATGTACTGCAGGTCATAAATTGTCAGTCAGGGTCCCTACCAAACCACTGTTGGAAAAAAGTGGTAGAAATGCCACCAAATATAAAGTGAGATGGAGAAATCTGCAGCAATGTCAGA…	ALA	notfound	notfound	notfound	notfound	SER	notfound	notfound	notfound	SER	notfound	LEU	notfound	notfound	notfound	14	Israel	BDI	Nature
BRL	no	> BRL_YDL227C_HO chromosome4:46271-48031 - 692 ATGCTTTCTGAAAACACGACTATTCTGATGGCTAACGGTGAAATTAAAGACATCGCAAACGTCACGGCTAACTCTTACGTTATGTGCGCAGATGGCTCCGCTGCCCGCGTCATAAATGTCACACAGGGCTATCAGAAAATCTATAATATACAGCAAAAAACCAAACACAGAGCTTTTGAAGGTGAACCTGGTAGGTTAGATCCCAGGCGTAGAACAGTTTATCAGCGTCTTGCATTACAATGTACTGCAGGTCATAAATTGTCAGTCAGGGTCCCTACCAAACCACTGTTGGAAAAAAGTGGTAGAAATGCCACCAAATATAAAGTGAGATGGAGAAATCTGCAGCAATGTC…	BRL_YDL227C_HO chromosome4:46271-48031 - 692ATGCTTTCTGAAAACACGACTATTCTGATGGCTAACGGTGAAATTAAAGACATCGCAAACGTCACGGCTAACTCTTACGTTATGTGCGCAGATGGCTCCGCTGCCCGCGTCATAAATGTCACACAGGGCTATCAGAAAATCTATAATATACAGCAAAAAACCAAACACAGAGCTTTTGAAGGTGAACCTGGTAGGTTAGATCCCAGGCGTAGAACAGTTTATCAGCGTCTTGCATTACAATGTACTGCAGGTCATAAATTGTCAGTCAGGGTCCCTACCAAACCACTGTTGGAAAAAAGTGGTAGAAATGCCACCAAATATAAAGTGAGATGGAGAAATCTGCAGCAATGTCAGA…	ALA	notfound	notfound	notfound	notfound	SER	notfound	notfound	notfound	SER	notfound	LEU	notfound	notfound	notfound	14	USA	BRL	Unknown
ASV	no	> ASV_YDL227C_HO chromosome4:46271-48031 - 692 ATGCTTTCTGAAAACACGACTATTCTGATGGCTAACGGTGAAATTAAAGACATCGCAAACGTCACGGCTAACTCTTACGTTATGTGCGCAGATGGCTCCGCTGCCCGCGTCATAAATGTCACACAGGGCTATCAGAAAATCTATAATATACAGCAAAAAACCAAACACAGAGCTTTTGAAGGTGAACCTGGTAGGTTAGATCCCAGGCGTAGAACAGTTTATCAGCGTCTTGCATTACAATGTACTGCAGGTCATAAATTGTCAGTCAGGGTCCCTACCAAACCACTGTTGGAAAAAAGTGGTAGAAATGCCACCAAATATAAAGTGAGATGGAGAAATCTGCAGCAATGTC…	ASV_YDL227C_HO chromosome4:46271-48031 - 692ATGCTTTCTGAAAACACGACTATTCTGATGGCTAACGGTGAAATTAAAGACATCGCAAACGTCACGGCTAACTCTTACGTTATGTGCGCAGATGGCTCCGCTGCCCGCGTCATAAATGTCACACAGGGCTATCAGAAAATCTATAATATACAGCAAAAAACCAAACACAGAGCTTTTGAAGGTGAACCTGGTAGGTTAGATCCCAGGCGTAGAACAGTTTATCAGCGTCTTGCATTACAATGTACTGCAGGTCATAAATTGTCAGTCAGGGTCCCTACCAAACCACTGTTGGAAAAAAGTGGTAGAAATGCCACCAAATATAAAGTGAGATGGAGAAATCTGCAGCAATGTCAGA…	ALA	notfound	notfound	notfound	notfound	SER	notfound	notfound	notfound	SER	notfound	LEU	notfound	notfound	notfound	14	Italy	ASV	Wine
BSS	no	> BSS_YDL227C_HO chromosome4:46271-48031 - 692 ATGCTTTCTGAAAACACGACTATTCTGATGGCTAACGGTGAAATTAAAGACATCGCAAACGTCACGGCTAACTCTTACGTTATGTGCGCAGATGGCTCCGCTGCCCGCGTCATAAATGTCACACAGGGCTATCAGAAAATCTATAATATACAGCAAAAAACCAAACACAGAGCTTTTGAAGGTGAACCTGGTAGGTTAGATCCCAGGCGTAGAACAGTTTATCAGCGTCTTGCATTACAATGTACTGCAGGTCATAAATTGTCAGTCAGGGTCCCTACCAAACCACTGTTGGAAAAAAGTGGTAGAAATGCCACCAAATATAAAGTGAGATGGAGAAATCTGCAGCAATGTC…	BSS_YDL227C_HO chromosome4:46271-48031 - 692ATGCTTTCTGAAAACACGACTATTCTGATGGCTAACGGTGAAATTAAAGACATCGCAAACGTCACGGCTAACTCTTACGTTATGTGCGCAGATGGCTCCGCTGCCCGCGTCATAAATGTCACACAGGGCTATCAGAAAATCTATAATATACAGCAAAAAACCAAACACAGAGCTTTTGAAGGTGAACCTGGTAGGTTAGATCCCAGGCGTAGAACAGTTTATCAGCGTCTTGCATTACAATGTACTGCAGGTCATAAATTGTCAGTCAGGGTCCCTACCAAACCACTGTTGGAAAAAAGTGGTAGAAATGCCACCAAATATAAAGTGAGATGGAGAAATCTGCAGCAATGTCAGA…	ALA	notfound	notfound	notfound	notfound	SER	notfound	notfound	notfound	SER	notfound	LEU	notfound	notfound	notfound	14	Mendoza area, Argentina	BSS	Wine
AHP	no	> AHP_YDL227C_HO chromosome4:46271-48031 - 692 ATGCTTTCTGAAAACACGACTATTCTGATGGCTAACGGTGAAATTAAAGACATCGCAAACGTCACGGCTAACTCTTACGTTATGTGCGCAGATGGCTCCGCTGCCCGCGTCATAAATGTCACACAGGGCTATCAGAAAATCTATAATATACAGCAAAAAACCAAACACAGAGCTTTTGAAGGTGAACCTGGTAGGTTAGATCCCAGGCGTAGAACAGTTTATCAGCGTCTTGCATTACAATGTACTGCAGGTCATAAATTGTCAGTCAGGGTCCCTACCAAACCACTGTTGGAAAAAAGTGGTAGAAATGCCACCAAATATAAAGTGAGATGGAGAAATCTGCAGCAATGTC…	AHP_YDL227C_HO chromosome4:46271-48031 - 692ATGCTTTCTGAAAACACGACTATTCTGATGGCTAACGGTGAAATTAAAGACATCGCAAACGTCACGGCTAACTCTTACGTTATGTGCGCAGATGGCTCCGCTGCCCGCGTCATAAATGTCACACAGGGCTATCAGAAAATCTATAATATACAGCAAAAAACCAAACACAGAGCTTTTGAAGGTGAACCTGGTAGGTTAGATCCCAGGCGTAGAACAGTTTATCAGCGTCTTGCATTACAATGTACTGCAGGTCATAAATTGTCAGTCAGGGTCCCTACCAAACCACTGTTGGAAAAAAGTGGTAGAAATGCCACCAAATATAAAGTGAGATGGAGAAATCTGCAGCAATGTCAGA…	ALA	notfound	notfound	notfound	notfound	SER	notfound	notfound	notfound	SER	notfound	notfound	HIS	notfound	notfound	15	Spain	AHP	Wine
ADK	no	> ADK_YDL227C_HO chromosome4:46271-48031 - 692 ATGCTTTCTGAAAACACGACTATTCTGATGGCTAACGGTGAAATTAAAGACATCGCAAACGTCACGGCTAACTCTTACGTTATGTGCGCAGATGGCTCCGCTGCCCGCGTCATAAATGTCACACAGGGCTATCAGAAAATCTATAATATACAGCAAAAAACCAAACACARAGCTTTTGAAGGTGAACCTGGTAGGTTAGATCCCAGGCGTAGAACAGTTTATCAGCGTCTTGCATTACAATGTACTGCAGGTCATAAATTGTCAGTCAGGGTCCCTACCAAACCACTGTTGGAAAAAAGTGGTAGAAATGCCACCAAATATAAAGTGAGATGGAGAAATCTGCAGCAATGTC…	ADK_YDL227C_HO chromosome4:46271-48031 - 692ATGCTTTCTGAAAACACGACTATTCTGATGGCTAACGGTGAAATTAAAGACATCGCAAACGTCACGGCTAACTCTTACGTTATGTGCGCAGATGGCTCCGCTGCCCGCGTCATAAATGTCACACAGGGCTATCAGAAAATCTATAATATACAGCAAAAAACCAAACACARAGCTTTTGAAGGTGAACCTGGTAGGTTAGATCCCAGGCGTAGAACAGTTTATCAGCGTCTTGCATTACAATGTACTGCAGGTCATAAATTGTCAGTCAGGGTCCCTACCAAACCACTGTTGGAAAAAAGTGGTAGAAATGCCACCAAATATAAAGTGAGATGGAGAAATCTGCAGCAATGTCAGA…	ALA	notfound	notfound	notfound	notfound	SER	notfound	notfound	notfound	notfound	LEU/SER	notfound	notfound	LEU/HIS	notfound	17	Shanaong, China	ADK	Bakery
BFH	no	> BFH_YDL227C_HO chromosome4:46271-48031 - 692 ATGCTTTCTGAAAACACGACTATTCTGATGGCTAACGGTGAAATTAAAGACATCGCAAACGTCACGGCTAACTCTTACGTTATGTGCGCAGATGGCTCCGCTGCCCGCGTCATAAATGTCACACAGGGCTATCAGAAAATCTATAATATACAGCAAAAAACCAAACACAGAGCTTTTGAAGGTGAACCTGGTAGGTTAGATCCCAGGCGTAGAACAGTTTATCAGCGTCTTGCATTACAATGTACTGCAGGTCATAAATTATCAGTCAGGGTCCCTACCAAACCACTGTTGGAAAAAAGTGGTAGAAATGCCACCAAATATAAAGTGAGATGGAGAAATCTGCAGCAATGTC…	BFH_YDL227C_HO chromosome4:46271-48031 - 692ATGCTTTCTGAAAACACGACTATTCTGATGGCTAACGGTGAAATTAAAGACATCGCAAACGTCACGGCTAACTCTTACGTTATGTGCGCAGATGGCTCCGCTGCCCGCGTCATAAATGTCACACAGGGCTATCAGAAAATCTATAATATACAGCAAAAAACCAAACACAGAGCTTTTGAAGGTGAACCTGGTAGGTTAGATCCCAGGCGTAGAACAGTTTATCAGCGTCTTGCATTACAATGTACTGCAGGTCATAAATTATCAGTCAGGGTCCCTACCAAACCACTGTTGGAAAAAAGTGGTAGAAATGCCACCAAATATAAAGTGAGATGGAGAAATCTGCAGCAATGTCAGA…	ALA	notfound	notfound	notfound	notfound	SER	notfound	notfound	LEU	notfound	notfound	LEU	notfound	notfound	notfound	18	Slovenia	BFH	Dairy
SACE_MAA	no	> SACE_MAA_YDL227C_HO chromosome4:46271-48031 - 692 ATGCTTTCTGAAAACACGACTATTCTGATGGCTAACGGTGAAATTAAAGACATCGCAAACGTCACGGCTAACTCTTACGTTATGTGCGCAGATGGCTCCGCTGCCCGCGTCATAAATGTCACACAGGGCTATCAGAAAATCTATAATATACAGCAAAAAACCAAACACAGAGCTTTTGAAGGTGAACCTGGTAGGTTAGATCCCAGGCGTAGAACAGTTTATCAGCGTCTTGCATTACAATGTACTGCAGGTCATAAATTGTCAGTCAGGGTCCCTACCAAACCACTGTTGGAAAAAAGTGGTAGAAATGCCACCAAATATAAAGTGAGATGGAGAAATCTGCAGCA…	SACE_MAA_YDL227C_HO chromosome4:46271-48031 - 692ATGCTTTCTGAAAACACGACTATTCTGATGGCTAACGGTGAAATTAAAGACATCGCAAACGTCACGGCTAACTCTTACGTTATGTGCGCAGATGGCTCCGCTGCCCGCGTCATAAATGTCACACAGGGCTATCAGAAAATCTATAATATACAGCAAAAAACCAAACACAGAGCTTTTGAAGGTGAACCTGGTAGGTTAGATCCCAGGCGTAGAACAGTTTATCAGCGTCTTGCATTACAATGTACTGCAGGTCATAAATTGTCAGTCAGGGTCCCTACCAAACCACTGTTGGAAAAAAGTGGTAGAAATGCCACCAAATATAAAGTGAGATGGAGAAATCTGCAGCAATG…	ALA	notfound	notfound	notfound	notfound	SER	notfound	notfound	LEU	notfound	notfound	notfound	HIS	notfound	notfound	19	Newcastle, UK	SACE_MAA	Human, clinical
CDM	no	> CDM_YDL227C_HO chromosome4:46271-48031 - 692 ATGCTTTCTGAAAACACGACTATTCTGATGGCTAACGGTGAAATTAAAGACATCGCAAACGTCACGGCTAACTCTTACGTTATGTGCGCAGATGGCTCCGCTGCCCGCGTCATAAATGTCACACAGGGCTATCAGAAAATCTATAATATACAGCAAAAAACCAAACACAGAGCTTTTGAAGGTGAACCTGGTAGGTTAGATCCCAGGCGTAGAACAGTTTATCAGCGTCTTGCATTACAATGTACTGCAGGTCATAAATTGTCAGTCAGGGTCCCTACCAAACCACTGTTGGAAAAAAAGTGGTAGAAATGCCACCAAATATAAAGTGAGATGGAGAAATCTGCAGCAATGT…	CDM_YDL227C_HO chromosome4:46271-48031 - 692ATGCTTTCTGAAAACACGACTATTCTGATGGCTAACGGTGAAATTAAAGACATCGCAAACGTCACGGCTAACTCTTACGTTATGTGCGCAGATGGCTCCGCTGCCCGCGTCATAAATGTCACACAGGGCTATCAGAAAATCTATAATATACAGCAAAAAACCAAACACAGAGCTTTTGAAGGTGAACCTGGTAGGTTAGATCCCAGGCGTAGAACAGTTTATCAGCGTCTTGCATTACAATGTACTGCAGGTCATAAATTGTCAGTCAGGGTCCCTACCAAACCACTGTTGGAAAAAAAGTGGTAGAAATGCCACCAAATATAAAGTGAGATGGAGAAATCTGCAGCAATGTCAG…	ALA	notfound	notfound	notfound	notfound	SER	notfound	notfound	LEU	notfound	notfound	notfound	HIS	notfound	notfound	19	Rio de Janeiro, Brazil	CDM	Water
ASC	no	> ASC_YDL227C_HO chromosome4:46271-48031 - 692 ATGCTTTCTGAAAACACGACTATTCTGATGGCTAACGGTGAAATTAAAGACATCGCAAACGTCACGGCTAACTCTTACGTTATGTGCGCAGATGGCTCCGCTGCCCGCGTCATAAATGTCACACAGGGCTATCAGAAAATCTATAATATACAGCAAAAAACCAAACACAGAGCTTTTGAAGGTGAACCTGGTAGGTTAGATCCCAGGCRTAGAACAGTTTATCAGCGTCTTGCATTACAATGTACTGCAGGTCATAAATTGTCAGTYAGGGTCCCTACCAAACCACTGTTGGAAAAAAGTGGTAGAAATGCCACCAAATATAAAGTGAGATGGAGAAATCTGCAGCAATGTC…	ASC_YDL227C_HO chromosome4:46271-48031 - 692ATGCTTTCTGAAAACACGACTATTCTGATGGCTAACGGTGAAATTAAAGACATCGCAAACGTCACGGCTAACTCTTACGTTATGTGCGCAGATGGCTCCGCTGCCCGCGTCATAAATGTCACACAGGGCTATCAGAAAATCTATAATATACAGCAAAAAACCAAACACAGAGCTTTTGAAGGTGAACCTGGTAGGTTAGATCCCAGGCRTAGAACAGTTTATCAGCGTCTTGCATTACAATGTACTGCAGGTCATAAATTGTCAGTYAGGGTCCCTACCAAACCACTGTTGGAAAAAAGTGGTAGAAATGCCACCAAATATAAAGTGAGATGGAGAAATCTGCAGCAATGTCAGA…	notfound	notfound	THR/ALA	GLY	notfound	notfound	notfound	notfound	LEU	notfound	notfound	LEU	notfound	notfound	notfound	20	South Africa	ASC	Beer
CFF	no	> CFF_YDL227C_HO chromosome4:46271-48031 - 692 ATGCTTTCTGAAAACACGACTATTCTGATGGCTAACGGTGAAATTAAAGACATCGCAAACGTCACGGCTAACTCTTACGTTATGTGCGCAGATGGCTCCGCTGCCCGCGTCATAAATGTCACACAGGGCTATCAGAAAATCTATAATATACAGCAAAAAACCAAACACAGAGCTTTTGAAGGTGAACCTGGTAGGTTAGATCCCAGGCGTAGAACAGTTTATCAGCGTCTTGCATTACAATGTACTGCAGGTCATAAATTGTCAGTCAGGGTCCCTACCAAACCACTGTTGGAAAAAAGTGGTAGAAATGCCACCAAATATAAAGTGAGATGGAGAAATCTGCAGCAATGTC…	CFF_YDL227C_HO chromosome4:46271-48031 - 692ATGCTTTCTGAAAACACGACTATTCTGATGGCTAACGGTGAAATTAAAGACATCGCAAACGTCACGGCTAACTCTTACGTTATGTGCGCAGATGGCTCCGCTGCCCGCGTCATAAATGTCACACAGGGCTATCAGAAAATCTATAATATACAGCAAAAAACCAAACACAGAGCTTTTGAAGGTGAACCTGGTAGGTTAGATCCCAGGCGTAGAACAGTTTATCAGCGTCTTGCATTACAATGTACTGCAGGTCATAAATTGTCAGTCAGGGTCCCTACCAAACCACTGTTGGAAAAAAGTGGTAGAAATGCCACCAAATATAAAGTGAGATGGAGAAATCTGCAGCAATGTCAGA…	notfound	notfound	THR/ALA	GLY	notfound	notfound	notfound	notfound	LEU	notfound	notfound	LEU	notfound	notfound	notfound	20	Belgium	CFF	Beer
CFT	no	> CFT_YDL227C_HO chromosome4:46271-48031 - 692 ATGCTTTCTGAAAACACGACTATTCTGATGGCTAACGGTGAAATTAAAGACATCGCAAACGTCACGGCTAACTCTTACGTTATGTGCGCAGATGGCTCCGCTGCCCGCGTCATAAATGTCACACAGGGCTATCAGAAAATCTATAATATACAGCAAAAAACCAAACACAGAGCTTTTGAAGGTGAACCTGGTAGGTTAGATCCCAGGCGTAGAACAGTTTATCAGCGTCTTGCATTACAATGTACTGCAGGTCATAAATTGTCAGTCAGGGTCCCTACCAAACCACTGTTGGAAAAAAGTGGTAGAAATGCCACCAAATATAAAGTGAGATGGAGAAATCTGCAGCAATGTC…	CFT_YDL227C_HO chromosome4:46271-48031 - 692ATGCTTTCTGAAAACACGACTATTCTGATGGCTAACGGTGAAATTAAAGACATCGCAAACGTCACGGCTAACTCTTACGTTATGTGCGCAGATGGCTCCGCTGCCCGCGTCATAAATGTCACACAGGGCTATCAGAAAATCTATAATATACAGCAAAAAACCAAACACAGAGCTTTTGAAGGTGAACCTGGTAGGTTAGATCCCAGGCGTAGAACAGTTTATCAGCGTCTTGCATTACAATGTACTGCAGGTCATAAATTGTCAGTCAGGGTCCCTACCAAACCACTGTTGGAAAAAAGTGGTAGAAATGCCACCAAATATAAAGTGAGATGGAGAAATCTGCAGCAATGTCAGA…	notfound	notfound	THR/ALA	GLY	notfound	notfound	notfound	notfound	LEU	notfound	notfound	LEU	notfound	notfound	notfound	20	Fresno area, California	CFT	Fruit
BMD	no	> BMD_YDL227C_HO chromosome4:46271-48031 - 692 ATGCTTTCTGAAAACACGACTATTCTGATGGCTAACGGTGAAATTAAAGACATCGCAAACGTCACGGCTAACTCTTACGTTATGTGCGCAGATGGCTCCGCTGCCCGCGTCATAAATGTCACACAGGGCTATCAGAAAATCTATAATATACAGCAAAAAACCAAACACAGAGCTTTTGAAGGTGAACCTGGTAGGTTAGATCCCAGGCGTAGAACAGTTTATCAGCGTCTTGCATTACAATGTACTGCAGGTCATAAATTGTCAGTCAGGGTCCCTACCAAACCACTGTTGGAAAAAAGTGGTAGAAATGCCACCAAATATAAAGTGAGATGGAGAAATCTGCAGCAATGTC…	BMD_YDL227C_HO chromosome4:46271-48031 - 692ATGCTTTCTGAAAACACGACTATTCTGATGGCTAACGGTGAAATTAAAGACATCGCAAACGTCACGGCTAACTCTTACGTTATGTGCGCAGATGGCTCCGCTGCCCGCGTCATAAATGTCACACAGGGCTATCAGAAAATCTATAATATACAGCAAAAAACCAAACACAGAGCTTTTGAAGGTGAACCTGGTAGGTTAGATCCCAGGCGTAGAACAGTTTATCAGCGTCTTGCATTACAATGTACTGCAGGTCATAAATTGTCAGTCAGGGTCCCTACCAAACCACTGTTGGAAAAAAGTGGTAGAAATGCCACCAAATATAAAGTGAGATGGAGAAATCTGCAGCAATGTCAGA…	notfound	notfound	THR/ALA	GLY	notfound	notfound	notfound	notfound	LEU	notfound	notfound	LEU	notfound	notfound	notfound	20	RVI Newcastle, UK	BMD	Human
BTA	no	> BTA_YDL227C_HO chromosome4:46271-48031 - 692 ATGCTTTCTGAAAACACGACTATTCTGATGGCTAACGGTGAAATTAAAGACATCGCAAACGTCACGGCTAACTCTTACGTTATGTGCGCAGATGGCTCCGCTGCCCGCGTCATAAATGTCACACAGGGCTATCAGAAAATCTATAATATACAGCAAAAAACCAAACACAGAGCTTTTGAAGGTGAACCTGGTAGGTTAGATCCCAGGCGTAGAACAGTTTATCAGCGTCTTGCATTACAATGTACTGCAGGTCATAAATTGTCAGTCAGGGTCCCTACMAAACCACTGTTGGAAAAAAGTGGTAGAAATGCCACCAAATATAAAGTGAGATGGAGAAATCTGCAGCAATGTC…	BTA_YDL227C_HO chromosome4:46271-48031 - 692ATGCTTTCTGAAAACACGACTATTCTGATGGCTAACGGTGAAATTAAAGACATCGCAAACGTCACGGCTAACTCTTACGTTATGTGCGCAGATGGCTCCGCTGCCCGCGTCATAAATGTCACACAGGGCTATCAGAAAATCTATAATATACAGCAAAAAACCAAACACAGAGCTTTTGAAGGTGAACCTGGTAGGTTAGATCCCAGGCGTAGAACAGTTTATCAGCGTCTTGCATTACAATGTACTGCAGGTCATAAATTGTCAGTCAGGGTCCCTACMAAACCACTGTTGGAAAAAAGTGGTAGAAATGCCACCAAATATAAAGTGAGATGGAGAAATCTGCAGCAATGTCAGA…	notfound	notfound	THR/ALA	GLY	notfound	notfound	notfound	notfound	LEU	notfound	notfound	LEU	notfound	notfound	notfound	20	Germany	BTA	Human, clinical
ATB	no	> ATB_YDL227C_HO chromosome4:46271-48031 - 692 ATGCTTTCTGAAAACACGACTATTCTGATGGCTAACGGTGAAATTAAAGACATCGCAAACGTCACGGCTAACTCTTACGTTATGTGCGCAGATGGCTCCGCTGCCCGCGTCATAAATGTCACACAGGGCTATCAGAAAATCTATAATATACAGCAAAAAACCAAACACAGAGCTTTTGAAGGTGAACCTGGTAGGTTAGATCCCAGGCGTAGAACAGTTTATCAGCGTCTTGCATTACAATGTACTGCAGGTCATAAATTGTCAGTCAGGGTCCCTACMAAACCACTGTTGGAAAAAAGTGGTAGAAATGCCACCAAATATAAAGTGAGATGGAGAAATCTGCAGCAATGTC…	ATB_YDL227C_HO chromosome4:46271-48031 - 692ATGCTTTCTGAAAACACGACTATTCTGATGGCTAACGGTGAAATTAAAGACATCGCAAACGTCACGGCTAACTCTTACGTTATGTGCGCAGATGGCTCCGCTGCCCGCGTCATAAATGTCACACAGGGCTATCAGAAAATCTATAATATACAGCAAAAAACCAAACACAGAGCTTTTGAAGGTGAACCTGGTAGGTTAGATCCCAGGCGTAGAACAGTTTATCAGCGTCTTGCATTACAATGTACTGCAGGTCATAAATTGTCAGTCAGGGTCCCTACMAAACCACTGTTGGAAAAAAGTGGTAGAAATGCCACCAAATATAAAGTGAGATGGAGAAATCTGCAGCAATGTCAGA…	notfound	notfound	THR/ALA	GLY	notfound	notfound	notfound	notfound	LEU	notfound	notfound	LEU	notfound	notfound	notfound	20	NA	ATB	Nature
BHD	no	> BHD_YDL227C_HO chromosome4:46271-48031 - 692 ATGCTTTCTGAAAACACGACTATTCTGATGGCTAACGGTGAAATTAAAGACATCGCAAACGTCACGGCTAACTCTTACGTTATGTGCGCAGATGGCTCCGCTGCCCGCGTCATAAATGTCACACAGGGCTATCAGAAAATCTATAATATACAGCAAAAAACCAAACACAGAGCTTTTGAAGGTGAACCTGGTAGGTTAGATCCCAGGCGTAGAACAGTTTATCAGCGTCTTGCATTACAATGTACTGCAGGTCATAAATTGTCAGTCAGGGTCCCTACCAAACCACTGTTGGAAAAAAGTGGTAGAAATGCCACCAAATATAAAGTGAGATGGAGAAATCTGCAGCAATGTC…	BHD_YDL227C_HO chromosome4:46271-48031 - 692ATGCTTTCTGAAAACACGACTATTCTGATGGCTAACGGTGAAATTAAAGACATCGCAAACGTCACGGCTAACTCTTACGTTATGTGCGCAGATGGCTCCGCTGCCCGCGTCATAAATGTCACACAGGGCTATCAGAAAATCTATAATATACAGCAAAAAACCAAACACAGAGCTTTTGAAGGTGAACCTGGTAGGTTAGATCCCAGGCGTAGAACAGTTTATCAGCGTCTTGCATTACAATGTACTGCAGGTCATAAATTGTCAGTCAGGGTCCCTACCAAACCACTGTTGGAAAAAAGTGGTAGAAATGCCACCAAATATAAAGTGAGATGGAGAAATCTGCAGCAATGTCAGA…	notfound	notfound	THR/ALA	GLY	notfound	notfound	notfound	notfound	LEU	notfound	notfound	notfound	HIS	notfound	36	21	Brittany, France	BHD	Cider
AAN	no	> AAN_YDL227C_HO chromosome4:46271-48031 - 692 ATGCTTTCTGAAAACACGACTATTCTGATGGCTAACGGTGAAATTAAAGACATCGCAAACGTCACGGCTAACTCTTACGTTATGTGCGCAGATGGCTCCGCTGCCCGCGTCATAAATGTCACACAGGGCTATCAGAAAATCTATAATATACAGCAAAAAACCAAACACAGAGCTTTTGAAGGTGAACCTGGTAGGTTAGATCCCAGGCRTAGAACAGTTTATCAGCGTCTTGCATTACAATGTACTGCAGGTCATAAATTGTCAGTCAGGGTCCCTACCAAACCACTGTTGGAAAAAAGTGGTAGAAATGCCACCAAATATAAAGTGAGATGGAGAAATCTGCAGCAATGTC…	AAN_YDL227C_HO chromosome4:46271-48031 - 692ATGCTTTCTGAAAACACGACTATTCTGATGGCTAACGGTGAAATTAAAGACATCGCAAACGTCACGGCTAACTCTTACGTTATGTGCGCAGATGGCTCCGCTGCCCGCGTCATAAATGTCACACAGGGCTATCAGAAAATCTATAATATACAGCAAAAAACCAAACACAGAGCTTTTGAAGGTGAACCTGGTAGGTTAGATCCCAGGCRTAGAACAGTTTATCAGCGTCTTGCATTACAATGTACTGCAGGTCATAAATTGTCAGTCAGGGTCCCTACCAAACCACTGTTGGAAAAAAGTGGTAGAAATGCCACCAAATATAAAGTGAGATGGAGAAATCTGCAGCAATGTCAGA…	notfound	notfound	THR/ALA	GLY	notfound	notfound	notfound	notfound	LEU	notfound	notfound	notfound	notfound	LEU/HIS	notfound	22	Czech Republic	AAN	Bakery
AAP	no	> AAP_YDL227C_HO chromosome4:46271-48031 - 692 ATGCTTTCTGAAAACACGACTATTCTGATGGCTAACGGTGAAATTAAAGACATCGCAAACGTCACGGCTAACTCTTACGTTATGTGCGCAGATGGCTCCGCTGCCCGCGTCATAAATGTCACACAGGGCTATCAGAAAATCTATAATATACAGCAAAAAACCAAACACAGAGCTTTTGAAGGTGAACCTGGTAGGTTAGATCCCAGGCRTAGAACAGTTTATCAGCGTCTTGCATTACAATGTACTGCAGGTCATAAATTGTCAGTCAGGGTCCCTACCAAACCACTGTTGGAAAAAAGTGGTAGAAATGCCACCAAATATAAAGTGAGATGGAGAAATCTGCAGCAATGTC…	AAP_YDL227C_HO chromosome4:46271-48031 - 692ATGCTTTCTGAAAACACGACTATTCTGATGGCTAACGGTGAAATTAAAGACATCGCAAACGTCACGGCTAACTCTTACGTTATGTGCGCAGATGGCTCCGCTGCCCGCGTCATAAATGTCACACAGGGCTATCAGAAAATCTATAATATACAGCAAAAAACCAAACACAGAGCTTTTGAAGGTGAACCTGGTAGGTTAGATCCCAGGCRTAGAACAGTTTATCAGCGTCTTGCATTACAATGTACTGCAGGTCATAAATTGTCAGTCAGGGTCCCTACCAAACCACTGTTGGAAAAAAGTGGTAGAAATGCCACCAAATATAAAGTGAGATGGAGAAATCTGCAGCAATGTCAGA…	notfound	notfound	THR/ALA	GLY	notfound	notfound	notfound	notfound	LEU	notfound	notfound	notfound	notfound	LEU/HIS	notfound	22	Australia	AAP	Bakery
CPQ	no	> CPQ_YDL227C_HO chromosome4:46271-48031 - 692 ATGCTTTCCGAAAACACGACTATTCTGATGGCTAACGGTGAAATTAAAGACATCGCAAACGTCACGGCTAACTCTTACGTTATGTGCGCAGATGGCTCCGCTGCCCGCGTCATAAATGTCACACAGGGCTATCAGAAAATCTATAATATACAGCAAAAAMCCAAACACAGAGCTTTTGAAGGTGAACCTGGTAGGTTAGATCCCAGGYGTAGAACAGTTTATCAGCGTCTTGCATTACAATGTACTGCAGGTCATAAATTGTCAGTCAGGGTCCCTACCAAACCACTGTTGGAAAAAAGTGGTAGAAATGCCACCAAATATAAAGTGAGATGGAGAAATCTGCAGCAATGTC…	CPQ_YDL227C_HO chromosome4:46271-48031 - 692ATGCTTTCCGAAAACACGACTATTCTGATGGCTAACGGTGAAATTAAAGACATCGCAAACGTCACGGCTAACTCTTACGTTATGTGCGCAGATGGCTCCGCTGCCCGCGTCATAAATGTCACACAGGGCTATCAGAAAATCTATAATATACAGCAAAAAMCCAAACACAGAGCTTTTGAAGGTGAACCTGGTAGGTTAGATCCCAGGYGTAGAACAGTTTATCAGCGTCTTGCATTACAATGTACTGCAGGTCATAAATTGTCAGTCAGGGTCCCTACCAAACCACTGTTGGAAAAAAGTGGTAGAAATGCCACCAAATATAAAGTGAGATGGAGAAATCTGCAGCAATGTCAGA…	notfound	notfound	THR/ALA	GLY	notfound	notfound	notfound	notfound	LEU	notfound	notfound	notfound	notfound	LEU/HIS	notfound	22	Tamaulipas, Mexico	CPQ	Distillery
ATC	no	> ATC_YDL227C_HO chromosome4:46271-48031 - 692 ATGCTTTCTGAAAACACGACTATTCTGATGGCTAACGGTGAAATTAAAGACATCGCAAACGTCACGGCTAACTCTTACGTTATGTGCGCAGATGGCTCCGCTGCCCGCGTCATAAATGTCACACAGGGCTATCAGAAAATCTATAATATACAGCAAAAAACCAAACACAGAGCTTTTGAAGGTGAACCTGGTAGGTTAGATCCCAGGCGTAGAACAGTTTATCAGCGTCTTGCATTACAATGTACTGCAGGTCATAAATTGTCAGTCAGGGTCCCTACCAAACCACTGTTGGAAAAAAGTGGTAGAAATGCCACCAAATATAAAGTGAGATGGAGAAATCTGCAGCAATGTC…	ATC_YDL227C_HO chromosome4:46271-48031 - 692ATGCTTTCTGAAAACACGACTATTCTGATGGCTAACGGTGAAATTAAAGACATCGCAAACGTCACGGCTAACTCTTACGTTATGTGCGCAGATGGCTCCGCTGCCCGCGTCATAAATGTCACACAGGGCTATCAGAAAATCTATAATATACAGCAAAAAACCAAACACAGAGCTTTTGAAGGTGAACCTGGTAGGTTAGATCCCAGGCGTAGAACAGTTTATCAGCGTCTTGCATTACAATGTACTGCAGGTCATAAATTGTCAGTCAGGGTCCCTACCAAACCACTGTTGGAAAAAAGTGGTAGAAATGCCACCAAATATAAAGTGAGATGGAGAAATCTGCAGCAATGTCAGA…	notfound	notfound	THR/ALA	GLY	notfound	notfound	notfound	notfound	LEU	notfound	notfound	notfound	notfound	LEU/HIS	notfound	22	NA	ATC	Human, clinical
SACE_YAN	no	> SACE_YAN_YDL227C_HO chromosome4:46271-48031 - 692 ATGCTTTCTGAAAACACGACTATTCTGATGGCTAACGGTGAAATTAAAGACATCGCAAACGTCACGGCTAACTCTTACGTTATGTGCGCAGATGGCTCCGCTGCCCGCGTCATAAATGTCACACAGGGCTATCAGAAAATCTATAATATACAGCAAAAAACCAAACACAGAGCTTTTGAAGGTGAACCTGGTAGGTTAGATCCCAGGCGTAGAACAGTTTATCAGCGTCTTGCATTACAATGTACTGCAGGTCATAAATTGTCAGTCAGGGTCCCTACCAAACCACTGTTGGAAAAAAGTGGTAGAAATGCCACCAAATATAAAGTGAGATGGAGAAATCTGCAGCA…	SACE_YAN_YDL227C_HO chromosome4:46271-48031 - 692ATGCTTTCTGAAAACACGACTATTCTGATGGCTAACGGTGAAATTAAAGACATCGCAAACGTCACGGCTAACTCTTACGTTATGTGCGCAGATGGCTCCGCTGCCCGCGTCATAAATGTCACACAGGGCTATCAGAAAATCTATAATATACAGCAAAAAACCAAACACAGAGCTTTTGAAGGTGAACCTGGTAGGTTAGATCCCAGGCGTAGAACAGTTTATCAGCGTCTTGCATTACAATGTACTGCAGGTCATAAATTGTCAGTCAGGGTCCCTACCAAACCACTGTTGGAAAAAAGTGGTAGAAATGCCACCAAATATAAAGTGAGATGGAGAAATCTGCAGCAATG…	notfound	notfound	THR/ALA	GLY	notfound	notfound	notfound	notfound	LEU	notfound	notfound	notfound	notfound	LEU/HIS	notfound	22	California, USA	SACE_YAN	Human, clinical
BBD	no	> BBD_YDL227C_HO chromosome4:46271-48031 - 692 ATGCTTTCTGAAAACACGACTATTCTGATGGCTAACGGTGAAATTAAAGACATCGCAAACGTCACGGCTAACTCTTACGTTATGTGCGCAGATGGCTCCGCTGCCCGCGTCATAAATGTCACACAGGGCTATCAGAAAATCTATAATATACAGCAAAAAACCAAACACAGAGCTTTTGAAGGTGAACCTGGTAGGTTAGATCCCAGGCRTAGAACAGTTTATCAGCGTCTTGCATTACAATGTACTGCAGGTCATAAATTGTCAGTCAGGGTCCCTACCAAACCACTGTTGGAAAAAAGTGGTAGAAATGCCACCAAATATAAAGTGAGATGGAGAAATCTGCAGCAATGTC…	BBD_YDL227C_HO chromosome4:46271-48031 - 692ATGCTTTCTGAAAACACGACTATTCTGATGGCTAACGGTGAAATTAAAGACATCGCAAACGTCACGGCTAACTCTTACGTTATGTGCGCAGATGGCTCCGCTGCCCGCGTCATAAATGTCACACAGGGCTATCAGAAAATCTATAATATACAGCAAAAAACCAAACACAGAGCTTTTGAAGGTGAACCTGGTAGGTTAGATCCCAGGCRTAGAACAGTTTATCAGCGTCTTGCATTACAATGTACTGCAGGTCATAAATTGTCAGTCAGGGTCCCTACCAAACCACTGTTGGAAAAAAGTGGTAGAAATGCCACCAAATATAAAGTGAGATGGAGAAATCTGCAGCAATGTCAGA…	notfound	notfound	THR/ALA	GLY	notfound	notfound	notfound	notfound	LEU	notfound	notfound	notfound	notfound	LEU/HIS	notfound	22	Jakubov, Slovakia	BBD	Water
BBE	no	> BBE_YDL227C_HO chromosome4:46271-48031 - 692 ATGCTTTCTGAAAACACGACTATTCTGATGGCTAACGGTGAAATTAAAGACATCGCAAACGTCACGGCTAACTCTTACGTTATGTGCGCAGATGGCTCCGCTGCCCGCGTCATAAATGTCACACAGGGCTATCAGAAAATCTATAATATACAGCAAAAAACCAAACACAGAGCTTTTGAAGGTGAACCTGGTAGGTTAGATCCCAGGCRTAGAACAGTTTATCAGCGTCTTGCATTACAATGTACTGCAGGTCATAAATTGTCAGTCAGGGTCCCTACCAAACCACTGTTGGAAAAAAGTGGTAGAAATGCCACCAAATATAAAGTGAGATGGAGAAATCTGCAGCAATGTC…	BBE_YDL227C_HO chromosome4:46271-48031 - 692ATGCTTTCTGAAAACACGACTATTCTGATGGCTAACGGTGAAATTAAAGACATCGCAAACGTCACGGCTAACTCTTACGTTATGTGCGCAGATGGCTCCGCTGCCCGCGTCATAAATGTCACACAGGGCTATCAGAAAATCTATAATATACAGCAAAAAACCAAACACAGAGCTTTTGAAGGTGAACCTGGTAGGTTAGATCCCAGGCRTAGAACAGTTTATCAGCGTCTTGCATTACAATGTACTGCAGGTCATAAATTGTCAGTCAGGGTCCCTACCAAACCACTGTTGGAAAAAAGTGGTAGAAATGCCACCAAATATAAAGTGAGATGGAGAAATCTGCAGCAATGTCAGA…	notfound	notfound	THR/ALA	GLY	notfound	notfound	notfound	notfound	LEU	notfound	notfound	notfound	notfound	LEU/HIS	notfound	22	Jakubov, Slovakia	BBE	Water
BBF	no	> BBF_YDL227C_HO chromosome4:46271-48031 - 692 ATGCTTTCTGAAAACACGACTATTCTGATGGCTAACGGTGAAATTAAAGACATCGCAAACGTCACGGCTAACTCTTACGTTATGTGCGCAGATGGCTCCGCTGCCCGCGTCATAAATGTCACACAGGGCTATCAGAAAATCTATAATATACAGCAAAAAACCAAACACAGAGCTTTTGAAGGTGAACCTGGTAGGTTAGATCCCAGGCRTAGAACAGTTTATCAGCGTCTTGCATTACAATGTACTGCAGGTCATAAATTGTCAGTCAGGGTCCCTACCAAACCACTGTTGGAAAAAAGTGGTAGAAATGCCACCAAATATAAAGTGAGATGGAGAAATCTGCAGCAATGTC…	BBF_YDL227C_HO chromosome4:46271-48031 - 692ATGCTTTCTGAAAACACGACTATTCTGATGGCTAACGGTGAAATTAAAGACATCGCAAACGTCACGGCTAACTCTTACGTTATGTGCGCAGATGGCTCCGCTGCCCGCGTCATAAATGTCACACAGGGCTATCAGAAAATCTATAATATACAGCAAAAAACCAAACACAGAGCTTTTGAAGGTGAACCTGGTAGGTTAGATCCCAGGCRTAGAACAGTTTATCAGCGTCTTGCATTACAATGTACTGCAGGTCATAAATTGTCAGTCAGGGTCCCTACCAAACCACTGTTGGAAAAAAGTGGTAGAAATGCCACCAAATATAAAGTGAGATGGAGAAATCTGCAGCAATGTCAGA…	notfound	notfound	THR/ALA	GLY	notfound	notfound	notfound	notfound	LEU	notfound	notfound	notfound	notfound	LEU/HIS	notfound	22	Bratislava, Slovakia	BBF	Water
BHL	no	> BHL_YDL227C_HO chromosome4:46271-48031 - 692 ATGCTTTCTGAAAACACGACTATTCTGATGGCTAACGGTGAAATTAAAGACATCGCAAACGTCACGGCTAACTCTTACGTTATGTGCGCAGATGGCTCCGCTGCCCGCGTCATAAATGTCACACAGGGCTATCAGAAAATCTATAATATACAGCAAAAAACCAAACACAGAGCTTTTGAAGGTGAACCTGGTAGGTTAGATCCCAGGCGTAGAACAGTTTATCAGCGTCTTGCATTACAATGTACTGCAGGTCATAAATTGTCAGTCAGGGTCCCTACCAAACCACTGTTGGAAAAAAGTGGTAGAAATGCCACCAAATATAAAGTGAGATGGAGAAATCTGCAGCAATGTC…	BHL_YDL227C_HO chromosome4:46271-48031 - 692ATGCTTTCTGAAAACACGACTATTCTGATGGCTAACGGTGAAATTAAAGACATCGCAAACGTCACGGCTAACTCTTACGTTATGTGCGCAGATGGCTCCGCTGCCCGCGTCATAAATGTCACACAGGGCTATCAGAAAATCTATAATATACAGCAAAAAACCAAACACAGAGCTTTTGAAGGTGAACCTGGTAGGTTAGATCCCAGGCGTAGAACAGTTTATCAGCGTCTTGCATTACAATGTACTGCAGGTCATAAATTGTCAGTCAGGGTCCCTACCAAACCACTGTTGGAAAAAAGTGGTAGAAATGCCACCAAATATAAAGTGAGATGGAGAAATCTGCAGCAATGTCAGA…	notfound	notfound	THR/ALA	notfound	notfound	notfound	GLY/SER	notfound	notfound	notfound	LEU/SER	LEU	notfound	notfound	36	23	Upper Normandy, France	BHL	Cider
BMQ	no	> BMQ_YDL227C_HO chromosome4:46271-48031 - 692 ATGCTTTCTGAAAACACGACTATTCTGATGGCTAACGGTGAAATTAAAGACATCGCAAACGTCACGGCTAACTCTTACGTTATGTGCGCAGATGGCTCCGCTGCCCGCGTCATAAATGTCACACAGGGCTATCAGAAAATCTATAATATACAGCAAAAAACCAAACACAGAGCTTTTGAAGGTGAACCTGGTAGGTTAGATCCCAGGCGTAGAACAGTTTATCAGCGTCTTGCATTAYAATGTACTGCAGGTCATAAATTGTCAGTCAGGGTCCCTACMAAACCACTGTTGGAAAAAAGTGGTAGAAATGCCACCAAATATAAAGTGAGATGGAGAAATCTGCAGCAATGTC…	BMQ_YDL227C_HO chromosome4:46271-48031 - 692ATGCTTTCTGAAAACACGACTATTCTGATGGCTAACGGTGAAATTAAAGACATCGCAAACGTCACGGCTAACTCTTACGTTATGTGCGCAGATGGCTCCGCTGCCCGCGTCATAAATGTCACACAGGGCTATCAGAAAATCTATAATATACAGCAAAAAACCAAACACAGAGCTTTTGAAGGTGAACCTGGTAGGTTAGATCCCAGGCGTAGAACAGTTTATCAGCGTCTTGCATTAYAATGTACTGCAGGTCATAAATTGTCAGTCAGGGTCCCTACMAAACCACTGTTGGAAAAAAGTGGTAGAAATGCCACCAAATATAAAGTGAGATGGAGAAATCTGCAGCAATGTCAGA…	notfound	notfound	THR/ALA	notfound	notfound	notfound	GLY/SER	notfound	notfound	notfound	LEU/SER	LEU	notfound	notfound	notfound	24	La Fe Hospital,Valencia, Spain	BMQ	Human, clinical
CKA	no	> CKA_YDL227C_HO chromosome4:46271-48031 - 692 ATGCTTTCTGAAAACACGACTATTCTGATGGCTAACGGTGAAATTAAAGACATCGCAAACGTCACGGCTAACTCTTACGTTATGTGCGCAGATGGCTCCGCTGCCCGCGTCATAAATGTCACACAGGGCTATCAGAAAATCTATAATATACAGCAAAAAACCAAACACAGAGCTTTTGAAGGTGAACCTGGTAGGTTAGATCCCAGGCGTAGAACAGTTTATCAGCGTCTTGCATTACAATGTACTGCAGGTCATAAATTGTCAGTCAGGGTCCCTACCAAACCACTGTTGGAAAAAAGTGGTAGAAATGCCACCAAATATAAAGTGAGATGGAGAAATCTGCAGCAATGTC…	CKA_YDL227C_HO chromosome4:46271-48031 - 692ATGCTTTCTGAAAACACGACTATTCTGATGGCTAACGGTGAAATTAAAGACATCGCAAACGTCACGGCTAACTCTTACGTTATGTGCGCAGATGGCTCCGCTGCCCGCGTCATAAATGTCACACAGGGCTATCAGAAAATCTATAATATACAGCAAAAAACCAAACACAGAGCTTTTGAAGGTGAACCTGGTAGGTTAGATCCCAGGCGTAGAACAGTTTATCAGCGTCTTGCATTACAATGTACTGCAGGTCATAAATTGTCAGTCAGGGTCCCTACCAAACCACTGTTGGAAAAAAGTGGTAGAAATGCCACCAAATATAAAGTGAGATGGAGAAATCTGCAGCAATGTCAGA…	notfound	notfound	THR/ALA	notfound	notfound	notfound	GLY/SER	notfound	notfound	notfound	LEU/SER	LEU	notfound	notfound	notfound	24	Paris, France, H3	CKA	Human, clinical
CRE	no	> CRE_YDL227C_HO chromosome4:46271-48031 - 692 ATGCTTTCTGAAAACACGACTATTCTGATGGCTAACGGTGAAATTAAAGACATCGCAAACGTCACGGCTAACTCTTACGTTATGTGCGCAGATGGCTCCGCTGCCCGCGTCATAAATGTCACACAGGGCTATCAGAAAATCTATAATATACAGCAAAAAACCAAACACAGAGCTTTTGAAGGTGAACCTGGTAGGTTAGATCCCAGGCGTAGAACAGTTTATCAGCGTCTTGCATTACAATGTACTGCAGGTCATAAATTGTCAGTCAGGGTCCCTACMAAACCACTGTTGGAAAAAAGTGGTAGAAATGCCACCAAATATAAAGTGAGATGGAGAAATCTGCAGCAATGTC…	CRE_YDL227C_HO chromosome4:46271-48031 - 692ATGCTTTCTGAAAACACGACTATTCTGATGGCTAACGGTGAAATTAAAGACATCGCAAACGTCACGGCTAACTCTTACGTTATGTGCGCAGATGGCTCCGCTGCCCGCGTCATAAATGTCACACAGGGCTATCAGAAAATCTATAATATACAGCAAAAAACCAAACACAGAGCTTTTGAAGGTGAACCTGGTAGGTTAGATCCCAGGCGTAGAACAGTTTATCAGCGTCTTGCATTACAATGTACTGCAGGTCATAAATTGTCAGTCAGGGTCCCTACMAAACCACTGTTGGAAAAAAGTGGTAGAAATGCCACCAAATATAAAGTGAGATGGAGAAATCTGCAGCAATGTCAGA…	notfound	notfound	THR/ALA	notfound	notfound	notfound	GLY/SER	notfound	notfound	notfound	LEU/SER	LEU	notfound	notfound	notfound	24	Ecuador	CRE	Insect
CBL	no	> CBL_YDL227C_HO chromosome4:46271-48031 - 692 ATGCTTTCTGAAAACACGACTATTCTGATGGCTAACGGTGAAATTAAAGACATCGCAAACGTCACGGCTAACTCTTACGTTATGTGCGCAGATGGCTCCGCTGCCCGCGTCATAAATGTCACACAGGGCTATCAGAAAATCTATAATATACAGCAAAAAACCAAACACAGAGCTTTTGAAGGTGAACCTGGTAGGTTAGATCCCAGGCGTAGAACAGTTTATCAGCGTCTTGCATTACAATGTACGGTCATAAATTGTCAGTCAGGGTCCCTACCAAACCACTGTTGGAAAAAAGTGGTAGAAATGCCACCAAATATAAAGTGAGATGGAGAAATCGCAATGTCAGACGCTT…	CBL_YDL227C_HO chromosome4:46271-48031 - 692ATGCTTTCTGAAAACACGACTATTCTGATGGCTAACGGTGAAATTAAAGACATCGCAAACGTCACGGCTAACTCTTACGTTATGTGCGCAGATGGCTCCGCTGCCCGCGTCATAAATGTCACACAGGGCTATCAGAAAATCTATAATATACAGCAAAAAACCAAACACAGAGCTTTTGAAGGTGAACCTGGTAGGTTAGATCCCAGGCGTAGAACAGTTTATCAGCGTCTTGCATTACAATGTACGGTCATAAATTGTCAGTCAGGGTCCCTACCAAACCACTGTTGGAAAAAAGTGGTAGAAATGCCACCAAATATAAAGTGAGATGGAGAAATCGCAATGTCAGACGCTTGAT…	notfound	notfound	THR/ALA	notfound	notfound	notfound	GLY/SER	notfound	notfound	notfound	LEU/SER	notfound	notfound	LEU/HIS	notfound	25	Schleswig-Holstein	CBL	Insect
CBM	no	> CBM_YDL227C_HO chromosome4:46271-48031 - 692 ATGCTTTCTGAAAACACGACTATTCTGATGGCTAACGGTGAAATTAAAGACATCGCAAACGTCACGGCTAACTCTTACGTTATGTGCGCAGATGGCTCCGCTGCCCGCGTCATAAATGTCACACAGGGCTATCAGAAAATCTATAATATACAGCAAAAAACCAAACACAGAGCTTTTGAAGGTGAACCTGGTAGGTTAGATCCCAGGCGTAGAACAGTTTATCAGCGTCTTGCATTACAATGTACGGTCATAAATTGTCAGTCAGGGTCCCTACCAAACCACTGTTGGAAAAAAGTGGTAGAAATGCCACCAAATATAAAGTGAGATGGAGAAATCGCAATGTCAGACGCTT…	CBM_YDL227C_HO chromosome4:46271-48031 - 692ATGCTTTCTGAAAACACGACTATTCTGATGGCTAACGGTGAAATTAAAGACATCGCAAACGTCACGGCTAACTCTTACGTTATGTGCGCAGATGGCTCCGCTGCCCGCGTCATAAATGTCACACAGGGCTATCAGAAAATCTATAATATACAGCAAAAAACCAAACACAGAGCTTTTGAAGGTGAACCTGGTAGGTTAGATCCCAGGCGTAGAACAGTTTATCAGCGTCTTGCATTACAATGTACGGTCATAAATTGTCAGTCAGGGTCCCTACCAAACCACTGTTGGAAAAAAGTGGTAGAAATGCCACCAAATATAAAGTGAGATGGAGAAATCGCAATGTCAGACGCTTGAT…	notfound	notfound	THR/ALA	notfound	notfound	notfound	GLY/SER	notfound	notfound	notfound	LEU/SER	notfound	notfound	LEU/HIS	notfound	25	Forest of Nehmten in Schleswig-Holstein	CBM	Insect
ASR	no	> ASR_YDL227C_HO chromosome4:46271-48031 - 692 ATGCTTTCTGAAAACACGACTATTCTGATGGCTAACGGTGAAATTAAAGACATCGCAAACGTCACGGCTAACTCTTACGTTATGTGCGCAGATGGCTCCGCTGCCCGCGTCATAAATGTCACACAGGGCTATCAGAAAATCTATAATATACAGCAAAAAACCAAACACAGAGCTTTTGAAGGTGAACCTGGTAGGTTAGATCCCAGGCGTAGAACAGTTTATCAGCGTCTTGCATTACAATGTACTGCAGGTCATAAATTGTCAGTCAGGGTCCCTACCAAACCACTGTTGGAAAAAAGTGGTAGAAATGCCACCAAATATAAAGTGAGATGGAGAAATCTGCAGCAATGTC…	ASR_YDL227C_HO chromosome4:46271-48031 - 692ATGCTTTCTGAAAACACGACTATTCTGATGGCTAACGGTGAAATTAAAGACATCGCAAACGTCACGGCTAACTCTTACGTTATGTGCGCAGATGGCTCCGCTGCCCGCGTCATAAATGTCACACAGGGCTATCAGAAAATCTATAATATACAGCAAAAAACCAAACACAGAGCTTTTGAAGGTGAACCTGGTAGGTTAGATCCCAGGCGTAGAACAGTTTATCAGCGTCTTGCATTACAATGTACTGCAGGTCATAAATTGTCAGTCAGGGTCCCTACCAAACCACTGTTGGAAAAAAGTGGTAGAAATGCCACCAAATATAAAGTGAGATGGAGAAATCTGCAGCAATGTCAGA…	notfound	notfound	THR/ALA	notfound	notfound	notfound	GLY/SER	notfound	notfound	notfound	LEU/SER	notfound	notfound	LEU/HIS	notfound	25	Italy	ASR	Wine
BSR	no	> BSR_YDL227C_HO chromosome4:46271-48031 - 692 ATGCTTTCTGAAAACACGACTATTCTGATGGCTAACGGTGAAATTAAAGACATCGCAAACGTCACGGCTAACTCTTACGTTATGTGCGCAGATGGCTCCGCTGCCCGCGTCATAAATGTCACACAGGGCTATCAGAAAATCTATAATATACAGCAAAAAACCAAACACAGAGCTTTTGAAGGTGAACCTGGTAGGTTAGATCCCAGGCGTAGAACAGTTTATCAGCGTCTTGCATTACAATGTACTGCAGGTCATAAATTGTCAGTCAGGGTCCCTACCAAACCACTGTTGGAAAAAAGTGGTAGAAATGCCACCAAATATAAAGTGAGATGGAGAAATCTGCAGCAATGTC…	BSR_YDL227C_HO chromosome4:46271-48031 - 692ATGCTTTCTGAAAACACGACTATTCTGATGGCTAACGGTGAAATTAAAGACATCGCAAACGTCACGGCTAACTCTTACGTTATGTGCGCAGATGGCTCCGCTGCCCGCGTCATAAATGTCACACAGGGCTATCAGAAAATCTATAATATACAGCAAAAAACCAAACACAGAGCTTTTGAAGGTGAACCTGGTAGGTTAGATCCCAGGCGTAGAACAGTTTATCAGCGTCTTGCATTACAATGTACTGCAGGTCATAAATTGTCAGTCAGGGTCCCTACCAAACCACTGTTGGAAAAAAGTGGTAGAAATGCCACCAAATATAAAGTGAGATGGAGAAATCTGCAGCAATGTCAGA…	notfound	notfound	THR/ALA	notfound	notfound	notfound	GLY/SER	notfound	notfound	notfound	LEU/SER	notfound	notfound	LEU/HIS	notfound	25	Mendoza area, Argentina	BSR	Wine
BTP	no	> BTP_YDL227C_HO chromosome4:46271-48031 - 692 ATGCTTTCTGAAAACACGACTATTCTGATGGCTAACGGTGAAATTAAAGACATCGCAAACGTCACGGCTAACTCTTACGTTATGTGCGCAGATGGCTCCGCTGCCCGCGTCATAAATGTCACACAGGGCTATCAGAAAATCTATAATATACAGCAAAAAACCAAACACAGAGCTTTTGAAGGTGAACCTGGTAGGTTAGATCCCAGGCGTAGAACAGTTTATCAGCGTCTTGCATTACAATGTACTGCAGGTCATAAATTGTCAGTCAGGGTCCCTACCAAACCACTGTTGGAAAAAAGTGGTAGAAATGCCACCAAATATAAAGTGAGATGGAGAAATCTGCAGCAATGTC…	BTP_YDL227C_HO chromosome4:46271-48031 - 692ATGCTTTCTGAAAACACGACTATTCTGATGGCTAACGGTGAAATTAAAGACATCGCAAACGTCACGGCTAACTCTTACGTTATGTGCGCAGATGGCTCCGCTGCCCGCGTCATAAATGTCACACAGGGCTATCAGAAAATCTATAATATACAGCAAAAAACCAAACACAGAGCTTTTGAAGGTGAACCTGGTAGGTTAGATCCCAGGCGTAGAACAGTTTATCAGCGTCTTGCATTACAATGTACTGCAGGTCATAAATTGTCAGTCAGGGTCCCTACCAAACCACTGTTGGAAAAAAGTGGTAGAAATGCCACCAAATATAAAGTGAGATGGAGAAATCTGCAGCAATGTCAGA…	notfound	notfound	THR/ALA	notfound	notfound	notfound	GLY/SER	notfound	notfound	notfound	LEU/SER	notfound	notfound	LEU/HIS	notfound	25	Valle de Ica, Peru	BTP	Wine
BTR	no	> BTR_YDL227C_HO chromosome4:46271-48031 - 692 ATGCTTTCTGAAAACACGACTATTCTGATGGCTAACGGTGAAATTAAAGACATCGCAAACGTCACGGCTAACTCTTACGTTATGTGCGCAGATGGCTCCGCTGCCCGCGTCATAAATGTCACACAGGGCTATCAGAAAATCTATAATATACAGCAAAAAACCAAACACAGAGCTTTTGAAGGTGAACCTGGTAGGTTAGATCCCAGGCGTAGAACAGTTTATCAGCGTCTTGCATTACAATGTACTGCAGGTCATAAATTGTCAGTCAGGGTCCCTACCAAACCACTGTTGGAAAAAAGTGGTAGAAATGCCACCAAATATAAAGTGAGATGGAGAAATCTGCAGCAATGTC…	BTR_YDL227C_HO chromosome4:46271-48031 - 692ATGCTTTCTGAAAACACGACTATTCTGATGGCTAACGGTGAAATTAAAGACATCGCAAACGTCACGGCTAACTCTTACGTTATGTGCGCAGATGGCTCCGCTGCCCGCGTCATAAATGTCACACAGGGCTATCAGAAAATCTATAATATACAGCAAAAAACCAAACACAGAGCTTTTGAAGGTGAACCTGGTAGGTTAGATCCCAGGCGTAGAACAGTTTATCAGCGTCTTGCATTACAATGTACTGCAGGTCATAAATTGTCAGTCAGGGTCCCTACCAAACCACTGTTGGAAAAAAGTGGTAGAAATGCCACCAAATATAAAGTGAGATGGAGAAATCTGCAGCAATGTCAGA…	notfound	notfound	THR/ALA	notfound	notfound	notfound	GLY/SER	notfound	notfound	notfound	LEU/SER	notfound	notfound	LEU/HIS	notfound	25	Valle de Ica, Peru	BTR	Wine
CHN	no	> CHN_YDL227C_HO chromosome4:46271-48031 - 692 ATGCTTTCTGAAAACACGACTATTCTGATGGCTAACGGTGAAATTAAAGACATCGCAAACGTCACGGCTAACTCTTACGTTATGTGCGCAGATGGCTCCGCTGCCCGCGTCATAAATGTCACACAGGGCTATCAGAAAATCTATAATATACAGCAAAAAACCAAACACAGAGCTTTTGAAGGTGAACCTGGTAGGTTAGATCCCAGGCRTAGAACAGTTTATCAGCGTCTTGCATTACAATGTACTGYAGGTCATAAATTGTCAGTCAGGGTCCCTACCAAACCACTGTTGGAAAAAAGTGGTAGAAATGCCACCAAATATAAAGTGAGATGGAGAAATCTGCAGCAATGTC…	CHN_YDL227C_HO chromosome4:46271-48031 - 692ATGCTTTCTGAAAACACGACTATTCTGATGGCTAACGGTGAAATTAAAGACATCGCAAACGTCACGGCTAACTCTTACGTTATGTGCGCAGATGGCTCCGCTGCCCGCGTCATAAATGTCACACAGGGCTATCAGAAAATCTATAATATACAGCAAAAAACCAAACACAGAGCTTTTGAAGGTGAACCTGGTAGGTTAGATCCCAGGCRTAGAACAGTTTATCAGCGTCTTGCATTACAATGTACTGYAGGTCATAAATTGTCAGTCAGGGTCCCTACCAAACCACTGTTGGAAAAAAGTGGTAGAAATGCCACCAAATATAAAGTGAGATGGAGAAATCTGCAGCAATGTCAGA…	notfound	notfound	THR/ALA	notfound	notfound	notfound	notfound	GLY/ASP	LEU	notfound	notfound	LEU	notfound	notfound	notfound	26	Gif-sur-Yvette	CHN	Bakery
CHP	no	> CHP_YDL227C_HO chromosome4:46271-48031 - 692 ATGCTTTCTGAAAACACGACTATTCTGATGGCTAACGGTGAAATTAAAGACATCGCAAACGTCACGGCTAACTCTTACGTTATGTGCGCAGATGGCTCCGCTGCCCGCGTCATAAATGTCACACAGGGCTATCAGAAAATCTATAATATACAGCAAAAAACCAAACACAGAGCTTTTGAAGGTGAACCTGGTAGGTTAGATCCCAGGCRTAGAACAGTTTATCAGCGTCTTGCATTACAATGTACTGYAGGTCATAAATTGTCAGTCAGGGTCCCTACCAAACCACTGTTGGAAAAAAGTGGTAGAAATGCCACCAAATATAAAGTGAGATGGAGAAATCTGCAGCAATGTC…	CHP_YDL227C_HO chromosome4:46271-48031 - 692ATGCTTTCTGAAAACACGACTATTCTGATGGCTAACGGTGAAATTAAAGACATCGCAAACGTCACGGCTAACTCTTACGTTATGTGCGCAGATGGCTCCGCTGCCCGCGTCATAAATGTCACACAGGGCTATCAGAAAATCTATAATATACAGCAAAAAACCAAACACAGAGCTTTTGAAGGTGAACCTGGTAGGTTAGATCCCAGGCRTAGAACAGTTTATCAGCGTCTTGCATTACAATGTACTGYAGGTCATAAATTGTCAGTCAGGGTCCCTACCAAACCACTGTTGGAAAAAAGTGGTAGAAATGCCACCAAATATAAAGTGAGATGGAGAAATCTGCAGCAATGTCAGA…	notfound	notfound	THR/ALA	notfound	notfound	notfound	notfound	GLY/ASP	LEU	notfound	notfound	LEU	notfound	notfound	notfound	26	Gif-sur-Yvette	CHP	Bakery
ASB	no	> ASB_YDL227C_HO chromosome4:46271-48031 - 692 ATGCTTTCTGAAAACACGACTATTCTGATGGCTAACGGTGAAATTAAAGACATCGCAAACGTCACGGCTAACTCTTACGTTATGTGCGCAGATGGCTCCGCTGCCCGCGTCATAAATGTCACACAGGGCTATCAGAAAATCTATAATATACAGCAAAAAACCAAACACAGAGCTTTTGAAGGTGAACCTGGTAGGTTAGATCCCAGGCGTAGAACAGTTTATCAGCGTCTTKCATTACAATRTACTGCAGGTCATAAATTGTCAGTCAGGGTCCCTACCAAACCACTGTTGGAAAAAAGTGGTAGAAATGCCACCAAATATAAAGTGAGATGGAGAAATCTGCAGCAATGTC…	ASB_YDL227C_HO chromosome4:46271-48031 - 692ATGCTTTCTGAAAACACGACTATTCTGATGGCTAACGGTGAAATTAAAGACATCGCAAACGTCACGGCTAACTCTTACGTTATGTGCGCAGATGGCTCCGCTGCCCGCGTCATAAATGTCACACAGGGCTATCAGAAAATCTATAATATACAGCAAAAAACCAAACACAGAGCTTTTGAAGGTGAACCTGGTAGGTTAGATCCCAGGCGTAGAACAGTTTATCAGCGTCTTKCATTACAATRTACTGCAGGTCATAAATTGTCAGTCAGGGTCCCTACCAAACCACTGTTGGAAAAAAGTGGTAGAAATGCCACCAAATATAAAGTGAGATGGAGAAATCTGCAGCAATGTCAGA…	notfound	notfound	THR/ALA	notfound	notfound	notfound	notfound	GLY/ASP	LEU	notfound	notfound	LEU	notfound	notfound	notfound	26	NA	ASB	Human, clinical
AAL	no	> AAL_YDL227C_HO chromosome4:46271-48031 - 692 ATGCTTTCTGAAAACACGACTATTCTGATGGCTAACGGTGAAATTAAAGACATCGCAAACGTCACGGCTAACTCTTACGTTATGTGCGCAGATGGCTCCGCTGCCCGCGTCATAAATGTCACACAGGGCTATCAGAAAATCTATAATATACAGCAAAAAACCAAACACAGAGCTTTTGAAGGTGAACCTGGTAGGTTAGATCCCAGGCRTAGAACAGTTTATCAGCGTCTTGCATTACAATGTACTGCAGGTCATAAATTGTCAGTCAGGGTCCCTACCAAACCACTGTTGGAAAAAAGTGGTAGAAATGCCACCAAATATAAAGTGAGATGGAGAAATCTGCAGCAATGTC…	AAL_YDL227C_HO chromosome4:46271-48031 - 692ATGCTTTCTGAAAACACGACTATTCTGATGGCTAACGGTGAAATTAAAGACATCGCAAACGTCACGGCTAACTCTTACGTTATGTGCGCAGATGGCTCCGCTGCCCGCGTCATAAATGTCACACAGGGCTATCAGAAAATCTATAATATACAGCAAAAAACCAAACACAGAGCTTTTGAAGGTGAACCTGGTAGGTTAGATCCCAGGCRTAGAACAGTTTATCAGCGTCTTGCATTACAATGTACTGCAGGTCATAAATTGTCAGTCAGGGTCCCTACCAAACCACTGTTGGAAAAAAGTGGTAGAAATGCCACCAAATATAAAGTGAGATGGAGAAATCTGCAGCAATGTCAGA…	notfound	notfound	THR/ALA	notfound	notfound	notfound	notfound	GLY/ASP	LEU	notfound	notfound	notfound	notfound	LEU/HIS	notfound	27	France	AAL	Bakery
ADM	no	> ADM_YDL227C_HO chromosome4:46271-48031 - 692 ATGCTTTCTGAAAACACGACTATTCTGATGGCTAACGGTGAAATTAAAGACATCGCAAACGTCACGGCTAACTCTTACGTTATGTGCGCAGATGGCTCCGCTGCCCGCGTCATAAATGTCACACAGGGCTATCAGAAAATCTATAATATACAGCAAAAAACCAAACACAGAGCTTTTGAAGGTGAACCTGGTAGGTTAGATCCCAGGCRTAGAACAGTTTATCAGCGTCTTGCATTACAATGTACTGCAGGTCATAAATTGTCAGTCAGGGTCCCTACCAAACCACTGTTGGAAAAAAGTGGTAGAAATGCCACCAAATATAAAGTGAGATGGAGAAATCTGCAGCAATGTC…	ADM_YDL227C_HO chromosome4:46271-48031 - 692ATGCTTTCTGAAAACACGACTATTCTGATGGCTAACGGTGAAATTAAAGACATCGCAAACGTCACGGCTAACTCTTACGTTATGTGCGCAGATGGCTCCGCTGCCCGCGTCATAAATGTCACACAGGGCTATCAGAAAATCTATAATATACAGCAAAAAACCAAACACAGAGCTTTTGAAGGTGAACCTGGTAGGTTAGATCCCAGGCRTAGAACAGTTTATCAGCGTCTTGCATTACAATGTACTGCAGGTCATAAATTGTCAGTCAGGGTCCCTACCAAACCACTGTTGGAAAAAAGTGGTAGAAATGCCACCAAATATAAAGTGAGATGGAGAAATCTGCAGCAATGTCAGA…	notfound	notfound	THR/ALA	notfound	notfound	notfound	notfound	GLY/ASP	LEU	notfound	notfound	notfound	notfound	LEU/HIS	notfound	27	Vietnam	ADM	Bakery
APK	no	> APK_YDL227C_HO chromosome4:46271-48031 - 692 ATGCTTTCTGAAAACACGACTATTCTGATGGCTAACGGTGAAATTAAAGACATCGCAAACGTCACGGCTAACTCTTACGTTATGTGCGCAGATGGCTCCGCTGCCCGCGTCATAAATGTCACACAGGGCTATCAGAAAATCTATAATATACAGCAAAAAACCAAACACAGAGCTTTTGAAGGTGAACCTGGTAGGTTAGATCCCAGGCRTAGAACAGTTTATCAGCGTCTTGCATTACAATGTACTGCAGGTCATAAATTGTCAGTCAGGGTCCCTACCAAACCACTGTTGGAAAAAAGTGGTAGAAATGCCACCAAATATAAAGTGAGATGGAGAAATCTGCAGCAATGTC…	APK_YDL227C_HO chromosome4:46271-48031 - 692ATGCTTTCTGAAAACACGACTATTCTGATGGCTAACGGTGAAATTAAAGACATCGCAAACGTCACGGCTAACTCTTACGTTATGTGCGCAGATGGCTCCGCTGCCCGCGTCATAAATGTCACACAGGGCTATCAGAAAATCTATAATATACAGCAAAAAACCAAACACAGAGCTTTTGAAGGTGAACCTGGTAGGTTAGATCCCAGGCRTAGAACAGTTTATCAGCGTCTTGCATTACAATGTACTGCAGGTCATAAATTGTCAGTCAGGGTCCCTACCAAACCACTGTTGGAAAAAAGTGGTAGAAATGCCACCAAATATAAAGTGAGATGGAGAAATCTGCAGCAATGTCAGA…	notfound	notfound	THR/ALA	notfound	notfound	notfound	notfound	GLY/ASP	LEU	notfound	notfound	notfound	notfound	LEU/HIS	notfound	27	South Africa	APK	Bakery
APN	no	> APN_YDL227C_HO chromosome4:46271-48031 - 692 ATGCTTTCTGAAAACACGACTATTCTGATGGCTAACGGTGAAATTAAAGACATCGCAAACGTCACGGCTAACTCTTACGTTATGTGCGCAGATGGCTCCGCTGCCCGCGTCATAAATGTCACACAGGGCTATCAGAAAATCTATAATATACAGCAAAAAACCAAACACAGAGCTTTTGAAGGTGAACCTGGTAGGTTAGATCCCAGGCRTAGAACAGTTTATCAGCGTCTTGCATTACAATGTACTGCAGGTCATAAATTGTCAGTCAGGGTCCCTACCAAACCACTGTTGGAAAAAAGTGGTAGAAATGCCACCAAATATAAAGTGAGATGGAGAAATCTGCAGCAATGTC…	APN_YDL227C_HO chromosome4:46271-48031 - 692ATGCTTTCTGAAAACACGACTATTCTGATGGCTAACGGTGAAATTAAAGACATCGCAAACGTCACGGCTAACTCTTACGTTATGTGCGCAGATGGCTCCGCTGCCCGCGTCATAAATGTCACACAGGGCTATCAGAAAATCTATAATATACAGCAAAAAACCAAACACAGAGCTTTTGAAGGTGAACCTGGTAGGTTAGATCCCAGGCRTAGAACAGTTTATCAGCGTCTTGCATTACAATGTACTGCAGGTCATAAATTGTCAGTCAGGGTCCCTACCAAACCACTGTTGGAAAAAAGTGGTAGAAATGCCACCAAATATAAAGTGAGATGGAGAAATCTGCAGCAATGTCAGA…	notfound	notfound	THR/ALA	notfound	notfound	notfound	notfound	GLY/ASP	LEU	notfound	notfound	notfound	notfound	LEU/HIS	notfound	27	Philippines	APN	Bakery
BTC	no	> BTC_YDL227C_HO chromosome4:46271-48031 - 692 ATGCTTTCTGAAAACACGACTATTCTGATGGCTAACGGTGAAATTAAAGACATCGCAAACGTCACGGCTAACTCTTACGTTATGTGCGCAGATGGCTCCGCTGCCCGCGTCATAAATGTCACACAGGGCTATCAGAAAATCTATAATATACAGCAAAAAACCAAACACAGAGCTTTTGAAGGTGAACCTGGTAGGTTAGATCCCAGGCRTAGAACAGTTTATCAGCGTCTTGCATTACAATGTACTGCAGGTCATAAATTGTCAGTCAGGGTCCCTACCAAACCACTGTTGGAAAAAAGTGGTAGAAATGCCACCAAATATAAAGTGAGATGGAGAAATCTGCAGCAATGTC…	BTC_YDL227C_HO chromosome4:46271-48031 - 692ATGCTTTCTGAAAACACGACTATTCTGATGGCTAACGGTGAAATTAAAGACATCGCAAACGTCACGGCTAACTCTTACGTTATGTGCGCAGATGGCTCCGCTGCCCGCGTCATAAATGTCACACAGGGCTATCAGAAAATCTATAATATACAGCAAAAAACCAAACACAGAGCTTTTGAAGGTGAACCTGGTAGGTTAGATCCCAGGCRTAGAACAGTTTATCAGCGTCTTGCATTACAATGTACTGCAGGTCATAAATTGTCAGTCAGGGTCCCTACCAAACCACTGTTGGAAAAAAGTGGTAGAAATGCCACCAAATATAAAGTGAGATGGAGAAATCTGCAGCAATGTCAGA…	notfound	notfound	THR/ALA	notfound	notfound	notfound	notfound	GLY/ASP	LEU	notfound	notfound	notfound	notfound	LEU/HIS	notfound	27	NA	BTC	Bakery
BTE	no	> BTE_YDL227C_HO chromosome4:46271-48031 - 692 ATGCTTTCTGAAAACACGACTATTCTGATGGCTAACGGTGAAATTAAAGACATCGCAAACGTCACGGCTAACTCTTACGTTATGTGCGCAGATGGCTCCGCTGCCCGCGTCATAAATGTCACACAGGGCTATCAGAAAATCTATAATATACAGCAAAAAACCAAACACAGAGCTTTTGAAGGTGAACCTGGTAGGTTAGATCCCAGGCRTAGAACAGTTTATCAGCGTCTTGCATTACAATGTACTGCAGGTCATAAATTGTCAGTCAGGGTCCCTACCAAACCACTGTTGGAAAAAAGTGGTAGAAATGCCACCAAATATAAAGTGAGATGGAGAAATCTGCAGCAATGTC…	BTE_YDL227C_HO chromosome4:46271-48031 - 692ATGCTTTCTGAAAACACGACTATTCTGATGGCTAACGGTGAAATTAAAGACATCGCAAACGTCACGGCTAACTCTTACGTTATGTGCGCAGATGGCTCCGCTGCCCGCGTCATAAATGTCACACAGGGCTATCAGAAAATCTATAATATACAGCAAAAAACCAAACACAGAGCTTTTGAAGGTGAACCTGGTAGGTTAGATCCCAGGCRTAGAACAGTTTATCAGCGTCTTGCATTACAATGTACTGCAGGTCATAAATTGTCAGTCAGGGTCCCTACCAAACCACTGTTGGAAAAAAGTGGTAGAAATGCCACCAAATATAAAGTGAGATGGAGAAATCTGCAGCAATGTCAGA…	notfound	notfound	THR/ALA	notfound	notfound	notfound	notfound	GLY/ASP	LEU	notfound	notfound	notfound	notfound	LEU/HIS	notfound	27	NA	BTE	Bakery
CBF	no	> CBF_YDL227C_HO chromosome4:46271-48031 - 692 ATGCTTTCTGAAAACACGACTATTCTGATGGCTAACGGTGAAATTAAAGACATCGCAAACGTCACGGCTAACTCTTACGTTATGTGCGCAGATGGCTCCGCTGCCCGCGTCATAAATGTCACACAGGGCTATCAGAAAATCTATAATATACAGCAAAAAACCAAACACAGAGCTTTTGAAGGTGAACCTGGTAGGTTAGATCCCAGGCRTAGAACAGTTTATCAGCGTCTTGCATTACAATGTACTGCAGGTCATAAATTGTCAGTCAGGGTCCCTACCAAACCACTGTTGGAAAAAAGTGGTAGAAATGCCACCAAATATAAAGTGAGATGGAGAAATCTGCAGCAATGTC…	CBF_YDL227C_HO chromosome4:46271-48031 - 692ATGCTTTCTGAAAACACGACTATTCTGATGGCTAACGGTGAAATTAAAGACATCGCAAACGTCACGGCTAACTCTTACGTTATGTGCGCAGATGGCTCCGCTGCCCGCGTCATAAATGTCACACAGGGCTATCAGAAAATCTATAATATACAGCAAAAAACCAAACACAGAGCTTTTGAAGGTGAACCTGGTAGGTTAGATCCCAGGCRTAGAACAGTTTATCAGCGTCTTGCATTACAATGTACTGCAGGTCATAAATTGTCAGTCAGGGTCCCTACCAAACCACTGTTGGAAAAAAGTGGTAGAAATGCCACCAAATATAAAGTGAGATGGAGAAATCTGCAGCAATGTCAGA…	notfound	notfound	THR/ALA	notfound	notfound	notfound	notfound	GLY/ASP	LEU	notfound	notfound	notfound	notfound	LEU/HIS	notfound	27	Matera, Italy	CBF	Bakery
CFP	no	> CFP_YDL227C_HO chromosome4:46271-48031 - 692 ATGCTTTCTGAAAACACGACTATTCTGATGGCTAACGGTGAAATTAAAGACATCGCAAACGTCACGGCTAACTCTTACGTTATGTGCGCAGATGGCTCCGCTGCCCGCGTCATAAATGTCACACAGGGCTATCAGAAAATCTATAATATACAGCAAAAAACCAAACACAGAGCTTTTGAAGGTGAACCTGGTAGGTTAGATCCCAGGCRTAGAACAGTTTATCAGCGTCTTGCATTACAATGTACTGCAGGTCATAAATTGTCAGTCAGGGTCCCTACCAAACCACTGTTGGAAAAAAGTGGTAGAAATGCCACCAAATATAAAGTGAGATGGAGAAATCTGCAGCAATGTC…	CFP_YDL227C_HO chromosome4:46271-48031 - 692ATGCTTTCTGAAAACACGACTATTCTGATGGCTAACGGTGAAATTAAAGACATCGCAAACGTCACGGCTAACTCTTACGTTATGTGCGCAGATGGCTCCGCTGCCCGCGTCATAAATGTCACACAGGGCTATCAGAAAATCTATAATATACAGCAAAAAACCAAACACAGAGCTTTTGAAGGTGAACCTGGTAGGTTAGATCCCAGGCRTAGAACAGTTTATCAGCGTCTTGCATTACAATGTACTGCAGGTCATAAATTGTCAGTCAGGGTCCCTACCAAACCACTGTTGGAAAAAAGTGGTAGAAATGCCACCAAATATAAAGTGAGATGGAGAAATCTGCAGCAATGTCAGA…	notfound	notfound	THR/ALA	notfound	notfound	notfound	notfound	GLY/ASP	LEU	notfound	notfound	notfound	notfound	LEU/HIS	notfound	27	NA	CFP	Beer
ALV	no	> ALV_YDL227C_HO chromosome4:46271-48031 - 692 ATGCTTTCTGAAAACACGACTATTCTGATGGCTAACGGTGAAATTAAAGACATCGCAAACGTCACGGCTAACTCTTACGTTATGTGCGCAGATGGCTCCGCTGCCCGCGTCATAAATGTCACACAGGGCTATCAGAAAATCTATAATATACAGCAAAAAACCAAACACAGAGCTTTTGAAGGTGAACCTGGTAGGTTAGATCCCAGGCRTAGAACAGTTTATCAGCGTCTTGCATTACAATGTACTGCAGGTCATAAATTGTCAGTCAGGGTCCCTACCAAACCACTGTTGGAAAAAAGTGGTAGAAATGCCACCAAATATAAAGTGAGATGGAGAAATCTGCAGCAATGTC…	ALV_YDL227C_HO chromosome4:46271-48031 - 692ATGCTTTCTGAAAACACGACTATTCTGATGGCTAACGGTGAAATTAAAGACATCGCAAACGTCACGGCTAACTCTTACGTTATGTGCGCAGATGGCTCCGCTGCCCGCGTCATAAATGTCACACAGGGCTATCAGAAAATCTATAATATACAGCAAAAAACCAAACACAGAGCTTTTGAAGGTGAACCTGGTAGGTTAGATCCCAGGCRTAGAACAGTTTATCAGCGTCTTGCATTACAATGTACTGCAGGTCATAAATTGTCAGTCAGGGTCCCTACCAAACCACTGTTGGAAAAAAGTGGTAGAAATGCCACCAAATATAAAGTGAGATGGAGAAATCTGCAGCAATGTCAGA…	notfound	notfound	THR/ALA	notfound	notfound	notfound	notfound	GLY/ASP	LEU	notfound	notfound	notfound	notfound	LEU/HIS	notfound	27	Male Zaluzie, Slovakia	ALV	Fruit
ATR	no	> ATR_YDL227C_HO chromosome4:46271-48031 - 692 ATGCTTTCTGAAAACACGACTATTCTGATGGCTAACGGTGAAATTAAAGACATCGCAAACGTCACGGCTAACTCTTACGTTATGTGCGCAGATGGCTCCGCTGCCCGCGTCATAAATGTCACACAGGGCTATCAGAAAATCTATAATATACAGCAAAAAACCAAACACAGAGCTTTTGAAGGTGAACCTGGTAGGTTAGATCCCAGGCRTAGAACAGTTTATCAGCGTCTTGCATTACAATGTACTGCAGGTCATAAATTGTCAGTCAGGGTCCCTACCAAACCACTGTTGGAAAAAAGTGGTAGAAATGCCACCAAATATAAAGTGAGATGGAGAAATCTGCAGCAATGTC…	ATR_YDL227C_HO chromosome4:46271-48031 - 692ATGCTTTCTGAAAACACGACTATTCTGATGGCTAACGGTGAAATTAAAGACATCGCAAACGTCACGGCTAACTCTTACGTTATGTGCGCAGATGGCTCCGCTGCCCGCGTCATAAATGTCACACAGGGCTATCAGAAAATCTATAATATACAGCAAAAAACCAAACACAGAGCTTTTGAAGGTGAACCTGGTAGGTTAGATCCCAGGCRTAGAACAGTTTATCAGCGTCTTGCATTACAATGTACTGCAGGTCATAAATTGTCAGTCAGGGTCCCTACCAAACCACTGTTGGAAAAAAGTGGTAGAAATGCCACCAAATATAAAGTGAGATGGAGAAATCTGCAGCAATGTCAGA…	notfound	notfound	THR/ALA	notfound	notfound	notfound	notfound	GLY/ASP	LEU	notfound	notfound	notfound	notfound	LEU/HIS	notfound	27	Spain	ATR	Fruit
BBC	no	> BBC_YDL227C_HO chromosome4:46271-48031 - 692 ATGCTTTCTGAAAACACGACTATTCTGATGGCTAACGGTGAAATTAAAGACATCGCAAACGTCACGGCTAACTCTTACGTTATGTGCGCAGATGGCTCCGCTGCCCGCGTCATAAATGTCACACAGGGCTATCAGAAAATCTATAATATACAGCAAAAAACCAAACACAGAGCTTTTGAAGGTGAACCTGGTAGGTTAGATCCCAGGCRTAGAACAGTTTATCAGCGTCTTGCATTACAATGTACTGCAGGTCATAAATTGTCAGTCAGGGTCCCTACCAAACCACTGTTGGAAAAAAGTGGTAGAAATGCCACCAAATATAAAGTGAGATGGAGAAATCTGCAGCAATGTC…	BBC_YDL227C_HO chromosome4:46271-48031 - 692ATGCTTTCTGAAAACACGACTATTCTGATGGCTAACGGTGAAATTAAAGACATCGCAAACGTCACGGCTAACTCTTACGTTATGTGCGCAGATGGCTCCGCTGCCCGCGTCATAAATGTCACACAGGGCTATCAGAAAATCTATAATATACAGCAAAAAACCAAACACAGAGCTTTTGAAGGTGAACCTGGTAGGTTAGATCCCAGGCRTAGAACAGTTTATCAGCGTCTTGCATTACAATGTACTGCAGGTCATAAATTGTCAGTCAGGGTCCCTACCAAACCACTGTTGGAAAAAAGTGGTAGAAATGCCACCAAATATAAAGTGAGATGGAGAAATCTGCAGCAATGTCAGA…	notfound	notfound	THR/ALA	notfound	notfound	notfound	notfound	GLY/ASP	LEU	notfound	notfound	notfound	notfound	LEU/HIS	notfound	27	Laksarska Nova Ves, Slovakia	BBC	Fruit
BMG	no	> BMG_YDL227C_HO chromosome4:46271-48031 - 692 ATGCTTTCTGAAAACACGACTATTCTGATGGCTAACGGTGAAATTAAAGACATCGCAAACGTCACGGCTAACTCTTACGTTATGTGCGCAGATGGCTCCGCTGCCCGCGTCATAAATGTCACACAGGGCTATCAGAAAATCTATAATATACAGCAAAAAACCAAACACAGAGCTTTTGAAGGTGAACCTGGTAGGTTAGATCCCAGGCRTAGAACAGTTTATCAGCGTCTTGCATTACAATGTACTGCAGGTCATAAATTGTCAGTCAGGGTCCCTACCAAACCACTGTTGGAAAAAAGTGGTAGAAATGCCACCAAATATAAAGTGAGATGGAGAAATCTGCAGCAATGTC…	BMG_YDL227C_HO chromosome4:46271-48031 - 692ATGCTTTCTGAAAACACGACTATTCTGATGGCTAACGGTGAAATTAAAGACATCGCAAACGTCACGGCTAACTCTTACGTTATGTGCGCAGATGGCTCCGCTGCCCGCGTCATAAATGTCACACAGGGCTATCAGAAAATCTATAATATACAGCAAAAAACCAAACACAGAGCTTTTGAAGGTGAACCTGGTAGGTTAGATCCCAGGCRTAGAACAGTTTATCAGCGTCTTGCATTACAATGTACTGCAGGTCATAAATTGTCAGTCAGGGTCCCTACCAAACCACTGTTGGAAAAAAGTGGTAGAAATGCCACCAAATATAAAGTGAGATGGAGAAATCTGCAGCAATGTCAGA…	notfound	notfound	THR/ALA	notfound	notfound	notfound	notfound	GLY/ASP	LEU	notfound	notfound	notfound	notfound	LEU/HIS	notfound	27	Norway	BMG	Human, clinical
BML	no	> BML_YDL227C_HO chromosome4:46271-48031 - 692 ATGCTTTCTGAAAACACGACTATTCTGATGGCTAACGGTGAAATTAAAGACATCGCAAACGTCACGGCTAACTCTTACGTTATGTGCGCAGATGGCTCCGCTGCCCGCGTCATAAATGTCACACAGGGCTATCAGAAAATCTATAATATACAGCAAAAAACCAAACACAGAGCTTTTGAAGGTGAACCTGGTAGGTTAGATCCCAGGCRTAGAACAGTTTATCAGCGTCTTGCATTACAATGTACTGCAGGTCATAAATTGTCAGTCAGGGTCCCTACCAAACCACTGTTGGAAAAAAGTGGTAGAAATGCCACCAAATATAAAGTGAGATGGAGAAATCTGCAGCAATGTC…	BML_YDL227C_HO chromosome4:46271-48031 - 692ATGCTTTCTGAAAACACGACTATTCTGATGGCTAACGGTGAAATTAAAGACATCGCAAACGTCACGGCTAACTCTTACGTTATGTGCGCAGATGGCTCCGCTGCCCGCGTCATAAATGTCACACAGGGCTATCAGAAAATCTATAATATACAGCAAAAAACCAAACACAGAGCTTTTGAAGGTGAACCTGGTAGGTTAGATCCCAGGCRTAGAACAGTTTATCAGCGTCTTGCATTACAATGTACTGCAGGTCATAAATTGTCAGTCAGGGTCCCTACCAAACCACTGTTGGAAAAAAGTGGTAGAAATGCCACCAAATATAAAGTGAGATGGAGAAATCTGCAGCAATGTCAGA…	notfound	notfound	THR/ALA	notfound	notfound	notfound	notfound	GLY/ASP	LEU	notfound	notfound	notfound	notfound	LEU/HIS	notfound	27	Belgium	BML	Human, clinical
BMM	no	> BMM_YDL227C_HO chromosome4:46271-48031 - 692 ATGCTTTCTGAAAACACGACTATTCTGATGGCTAACGGTGAAATTAAAGACATCGCAAACGTCACGGCTAACTCTTACGTTATGTGCGCAGATGGCTCCGCTGCCCGCGTCATAAATGTCACACAGGGCTATCAGAAAATCTATAATATACAGCAAAAAACCAAACACAGAGCTTTTGAAGGTGAACCTGGTAGGTTAGATCCCAGGCRTAGAACAGTTTATCAGCGTCTTGCATTACAATGTACTGCAGGTCATAAATTGTCAGTCAGGGTCCCTACCAAACCACTGTTGGAAAAAAGTGGTAGAAATGCCACCAAATATAAAGTGAGATGGAGAAATCTGCAGCAATGTC…	BMM_YDL227C_HO chromosome4:46271-48031 - 692ATGCTTTCTGAAAACACGACTATTCTGATGGCTAACGGTGAAATTAAAGACATCGCAAACGTCACGGCTAACTCTTACGTTATGTGCGCAGATGGCTCCGCTGCCCGCGTCATAAATGTCACACAGGGCTATCAGAAAATCTATAATATACAGCAAAAAACCAAACACAGAGCTTTTGAAGGTGAACCTGGTAGGTTAGATCCCAGGCRTAGAACAGTTTATCAGCGTCTTGCATTACAATGTACTGCAGGTCATAAATTGTCAGTCAGGGTCCCTACCAAACCACTGTTGGAAAAAAGTGGTAGAAATGCCACCAAATATAAAGTGAGATGGAGAAATCTGCAGCAATGTCAGA…	notfound	notfound	THR/ALA	notfound	notfound	notfound	notfound	GLY/ASP	LEU	notfound	notfound	notfound	notfound	LEU/HIS	notfound	27	Vall d'Hebron hospital, Barcelona, Spain	BMM	Human, clinical
CHR	no	> CHR_YDL227C_HO chromosome4:46271-48031 - 692 ATGCTTTCTGAAAACACGACTATTCTGATGGCTAACGGTGAAATTAAAGACATCGCAAACGTCACGGCTAACTCTTACGTTATGTGCGCAGATGGCTCCGCTGCCCGCGTCATAAATGTCACACAGGGCTATCAGAAAATCTATAATATACAGCAAAAAACCAAACACAGAGCTTTTGAAGGTGAACCTGGTAGGTTAGATCCCAGGCRTAGAACAGTTTATCAGCGTCTTGCATTACAATGTACTGCAGGTCATAAATTGTCAGTCAGGGTCCCTACCAAACCACTGTTGGAAAAAAGTGGTAGAAATGCCACCAAATATAAAGTGAGATGGAGAAATCTGCAGCAATGTC…	CHR_YDL227C_HO chromosome4:46271-48031 - 692ATGCTTTCTGAAAACACGACTATTCTGATGGCTAACGGTGAAATTAAAGACATCGCAAACGTCACGGCTAACTCTTACGTTATGTGCGCAGATGGCTCCGCTGCCCGCGTCATAAATGTCACACAGGGCTATCAGAAAATCTATAATATACAGCAAAAAACCAAACACAGAGCTTTTGAAGGTGAACCTGGTAGGTTAGATCCCAGGCRTAGAACAGTTTATCAGCGTCTTGCATTACAATGTACTGCAGGTCATAAATTGTCAGTCAGGGTCCCTACCAAACCACTGTTGGAAAAAAGTGGTAGAAATGCCACCAAATATAAAGTGAGATGGAGAAATCTGCAGCAATGTCAGA…	notfound	notfound	THR/ALA	notfound	notfound	notfound	notfound	GLY/ASP	LEU	notfound	notfound	notfound	notfound	LEU/HIS	notfound	27	France	CHR	Human, clinical
CIE	no	> CIE_YDL227C_HO chromosome4:46271-48031 - 692 ATGCTTTCTGAAAACACGACTATTCTGATGGCTAACGGTGAAATTAAAGACATCGCAAACGTCACGGCTAACTCTTACGTTATGTGCGCAGATGGCTCCGCTGCCCGCGTCATAAATGTCACACAGGGCTATCAGAAAATCTATAATATACAGCAAAAAACCAAACACAGAGCTTTTGAAGGTGAACCTGGTAGGTTAGATCCCAGGCRTAGAACAGTTTATCAGCGTCTTGCATTACAATGTACTGCAGGTCATAAATTGTCAGTCAGGGTCCCTACCAAACCACTGTTGGAAAAAAGTGGTAGAAATGCCACCAAATATAAAGTGAGATGGAGAAATCTGCAGCAATGTC…	CIE_YDL227C_HO chromosome4:46271-48031 - 692ATGCTTTCTGAAAACACGACTATTCTGATGGCTAACGGTGAAATTAAAGACATCGCAAACGTCACGGCTAACTCTTACGTTATGTGCGCAGATGGCTCCGCTGCCCGCGTCATAAATGTCACACAGGGCTATCAGAAAATCTATAATATACAGCAAAAAACCAAACACAGAGCTTTTGAAGGTGAACCTGGTAGGTTAGATCCCAGGCRTAGAACAGTTTATCAGCGTCTTGCATTACAATGTACTGCAGGTCATAAATTGTCAGTCAGGGTCCCTACCAAACCACTGTTGGAAAAAAGTGGTAGAAATGCCACCAAATATAAAGTGAGATGGAGAAATCTGCAGCAATGTCAGA…	notfound	notfound	THR/ALA	notfound	notfound	notfound	notfound	GLY/ASP	LEU	notfound	notfound	notfound	notfound	LEU/HIS	notfound	27	Spain	CIE	Human, clinical
CKK	no	> CKK_YDL227C_HO chromosome4:46271-48031 - 692 ATGCTTTCTGAAAACACGACTATTCTGATGGCTAACGGTGAAATTAAAGACATCGCAAACGTCACGGCTAACTCTTACGTTATGTGCGCAGATGGCTCCGCTGCCCGCGTCATAAATGTCACACAGGGCTATCAGAAAATCTATAATATACAGCAAAAAACCAAACACAGAGCTTTTGAAGGTGAACCTGGTAGGTTAGATCCCAGGCRTAGAACAGTTTATCAGCGTCTTGCATTACAATGTACTGCAGGTCATAAATTGTCAGTCAGGGTCCCTACCAAACCACTGTTGGAAAAAAGTGGTAGAAATGCCACCAAATATAAAGTGAGATGGAGAAATCTGCAGCAATGTC…	CKK_YDL227C_HO chromosome4:46271-48031 - 692ATGCTTTCTGAAAACACGACTATTCTGATGGCTAACGGTGAAATTAAAGACATCGCAAACGTCACGGCTAACTCTTACGTTATGTGCGCAGATGGCTCCGCTGCCCGCGTCATAAATGTCACACAGGGCTATCAGAAAATCTATAATATACAGCAAAAAACCAAACACAGAGCTTTTGAAGGTGAACCTGGTAGGTTAGATCCCAGGCRTAGAACAGTTTATCAGCGTCTTGCATTACAATGTACTGCAGGTCATAAATTGTCAGTCAGGGTCCCTACCAAACCACTGTTGGAAAAAAGTGGTAGAAATGCCACCAAATATAAAGTGAGATGGAGAAATCTGCAGCAATGTCAGA…	notfound	notfound	THR/ALA	notfound	notfound	notfound	notfound	GLY/ASP	LEU	notfound	notfound	notfound	notfound	LEU/HIS	notfound	27	Amiens, France	CKK	Human, clinical
CKS	no	> CKS_YDL227C_HO chromosome4:46271-48031 - 692 ATGCTTTCTGAAAACACGACTATTCTGATGGCTAACGGTGAAATTAAAGACATCGCAAACGTCACGGCTAACTCTTACGTTATGTGCGCAGATGGCTCCGCTGCCCGCGTCATAAATGTCACACAGGGCTATCAGAAAATCTATAATATACAGCAAAAAACCAAACACAGAGCTTTTGAAGGTGAACCTGGTAGGTTAGATCCCAGGCRTAGAACAGTTTATCAGCGTCTTGCATTACAATGTACTGCAGGTCATAAATTGTCAGTCAGGGTCCCTACCAAACCACTGTTGGAAAAAAGTGGTAGAAATGCCACCAAATATAAAGTGAGATGGAGAAATCTGCAGCAATGTC…	CKS_YDL227C_HO chromosome4:46271-48031 - 692ATGCTTTCTGAAAACACGACTATTCTGATGGCTAACGGTGAAATTAAAGACATCGCAAACGTCACGGCTAACTCTTACGTTATGTGCGCAGATGGCTCCGCTGCCCGCGTCATAAATGTCACACAGGGCTATCAGAAAATCTATAATATACAGCAAAAAACCAAACACAGAGCTTTTGAAGGTGAACCTGGTAGGTTAGATCCCAGGCRTAGAACAGTTTATCAGCGTCTTGCATTACAATGTACTGCAGGTCATAAATTGTCAGTCAGGGTCCCTACCAAACCACTGTTGGAAAAAAGTGGTAGAAATGCCACCAAATATAAAGTGAGATGGAGAAATCTGCAGCAATGTCAGA…	notfound	notfound	THR/ALA	notfound	notfound	notfound	notfound	GLY/ASP	LEU	notfound	notfound	notfound	notfound	LEU/HIS	notfound	27	France	CKS	Human, clinical
[truncated: 597 more rows]

## Sheet: "Natural" isolates
Identifier	Strain name and Genome	Ala189: CTCGCAGGAAATG	Thr189: CTCACAGGAAATG	Thr/Ala189: CTCRCAGGAAATG	Gly223: GACGGTA	Asp223: GACGATA	Ser223: GACAGTA	Gly/Ser223 Heterozygous: GACRGTA	223 Gly/Asp Heterozygous: GACGRTA	Leu405: AACTTTACAGAA	Ser405: AACTTCACAGAA	Leu/Ser405 heterozygous: AACTTYACAGAA	Leu475: AGAACAGCTTAAA	His475: AGAACAGCATAAA	Leu/His475: AGAACAGCWTAAA	36-amino acid deletion at positions 524–559: TGTATAAAATGTGGCG	Group	Geographical origins	Standardized name	Ecological origins	Sporulation (asci at 72 hr)
[truncated: 41 more rows]

[truncated: 3 more sheets: Lab HO deletion, Identical to Denver HO allele, for Mapping]
