# Supplementary material
Source: publisher figshare collection journal article supplement (https://gsajournals.figshare.com/articles/dataset/_/27146583)
Supplement: Supplementary file 2 [file 1]

**Table S2** Connections between lecture topics and Colorado State middle school Science standards and learning expectations

| Lecture topic                                                                                                                                    | State standard(s)<br>( <a href="https://www.cde.state.co.us/apps/standards/7,38,16">https://www.cde.state.co.us/apps/standards/7,38,16</a> )                                                                                                             | Learning expectation(s)                                                                                                                            | Science curriculum unit             |
|--------------------------------------------------------------------------------------------------------------------------------------------------|----------------------------------------------------------------------------------------------------------------------------------------------------------------------------------------------------------------------------------------------------------|----------------------------------------------------------------------------------------------------------------------------------------------------|-------------------------------------|
| <i>S. cerevisiae</i> as a microbe and its basic life cycle                                                                                       | All living things are made up of cells, which is the smallest unit that can be said to be alive                                                                                                                                                          | Changes in environmental conditions can affect the survival of individual organisms, populations, and entire species                               | Microbiome, Traits and Reproduction |
|                                                                                                                                                  | Organisms reproduce, either sexually or asexually, and transfer their genetic information to their offspring                                                                                                                                             |                                                                                                                                                    |                                     |
| Fermentation-focused metabolism of <i>S. cerevisiae</i> , natural habitats and industrial use                                                    | Organisms and populations of organisms are dependent on their environmental interactions both with other living things and with nonliving factors                                                                                                        | Explain and illustrate with examples how living systems interact with the biotic and abiotic environment                                           | Metabolism, Microbiome              |
| <i>HO</i> gene function in mating-type switching, non-functional <i>ho</i> alleles, lack of selection for <i>HO</i> when strains don't sporulate | Heredity explains why offspring resemble, but are not identical to, their parents and is a unifying biological principle. Heredity refers to specific mechanisms by which characteristics or traits are passed from one generation to the next via genes | Analyze how various organisms grow, develop, and differentiate during their lifetimes based on an interplay between genetics and their environment | Traits and reproduction             |
|                                                                                                                                                  | Genetic variations among individuals in a population give some individuals an advantage in surviving and reproducing in their environment                                                                                                                | Explain how biological evolution accounts for the unity and diversity of living organisms                                                          |                                     |
|                                                                                                                                                  | Adaptation by natural selection acting over generations is one important process by which species change over time in response to changes in environmental conditions                                                                                    |                                                                                                                                                    |                                     |
| Species identification by DNA "barcode" sequencing                                                                                               | Genetic variations among individuals in a population give some individuals an advantage in surviving and reproducing in their environment                                                                                                                | Explain how biological evolution accounts for the unity and diversity of living organisms                                                          | Traits and reproduction             |
