# Supplementary material
Source: publisher figshare collection journal article supplement (https://gsajournals.figshare.com/articles/dataset/_/27146583)
Supplement: Supplementary file 3 [file 1]

**A**

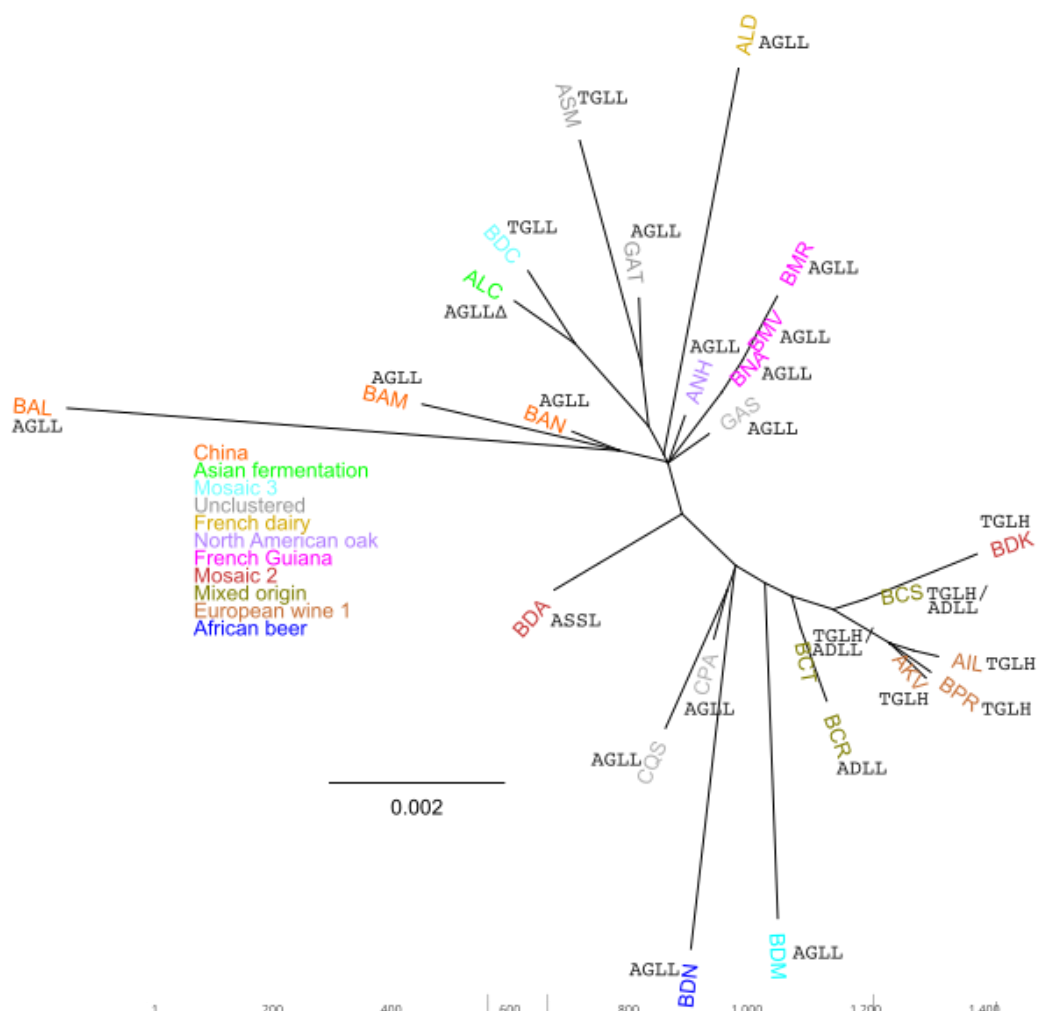

**B**

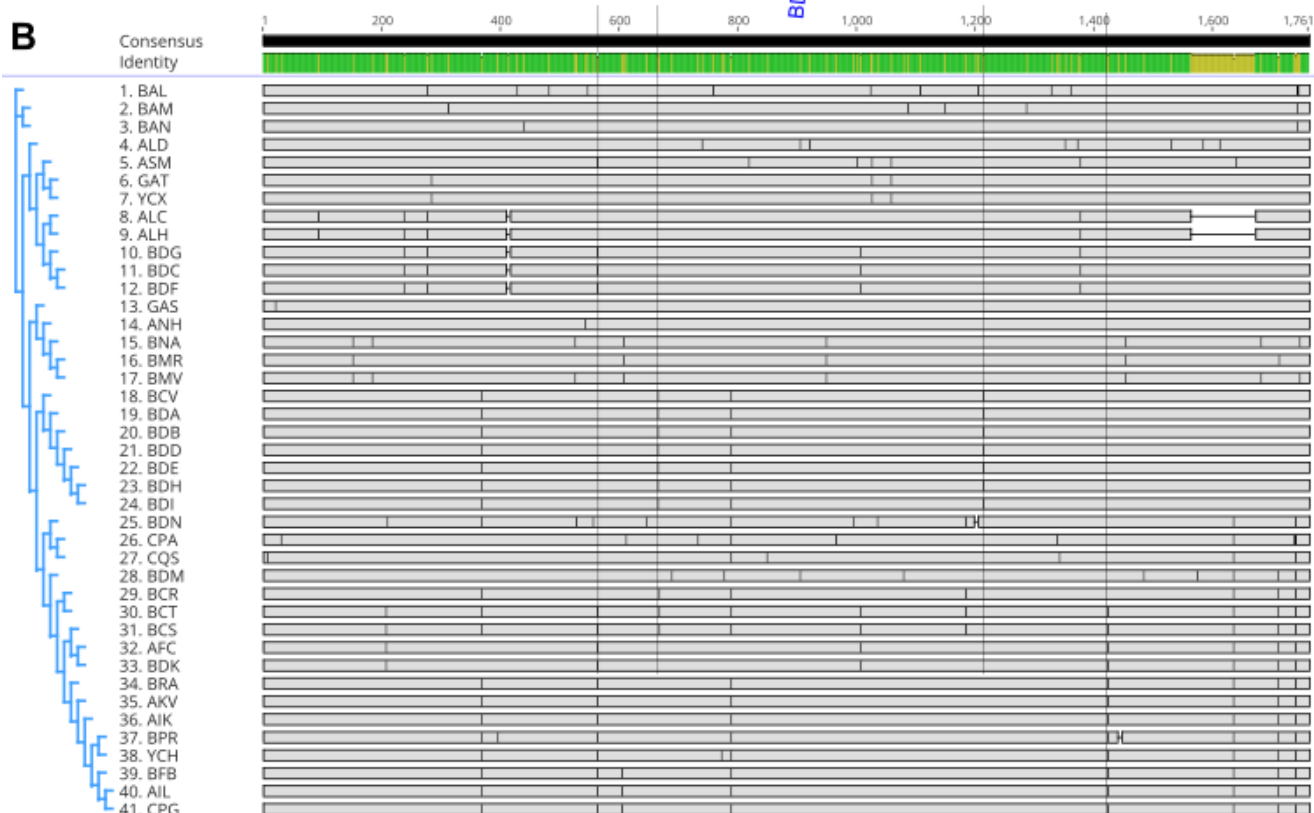

**Figure S1. Phylogenetic relationships between natural *S. cerevisiae* isolates based on *HO* gene sequence**

(A) Phylogenetic tree of the same 41 isolates mapped in Figure 2B, using the same code to represent the residues at key positions and the presence of the 36-residue deletion. Color coding shows which isolates belong to which clade, as defined in the 1,011 genomes study (Peter *et al.*, 2018). The three-letter names for each isolate are the same as assigned in that study (see Supplementary Table S1).

(B) Phylogenetic tree and DNA sequence alignment of *HO* coding regions of the same isolates. Vertical lines indicate the positions corresponding to codons 189, 223, 405, and 475.
